# Supplementary material for: Comprehensive Metabolomic Analysis Reveals Dynamic Metabolic Reprogramming in Hep3B Cells with Aflatoxin B1 Exposure
Source: MDPI journal article supplement (doi:10.3390/toxins13060384), 2021-05-27
Supplement: s1 [file s1]

# Supplementary Materials: Comprehensive Metabolomic Analysis Reveals Dynamic Metabolic Reprogramming in Hep3B Cells with Aflatoxin B1 Exposure

Shufeng Wang, Xin Yang, Feng Liu, Xinzheng Wang, Xuemin Zhang, Kun He and Hongxia Wang

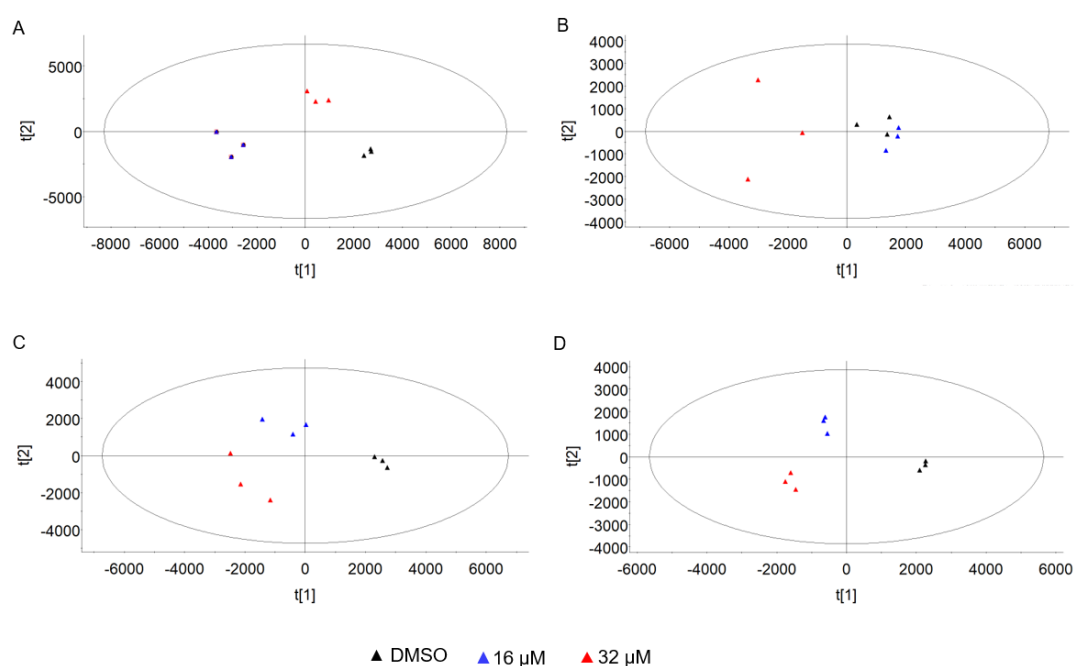

**Figure S1.** PLS-DA score plots based on Figure 3A–D, which were obtained by all metabolic features obtained from three biological replicates of AFB1 treated groups and control group by RPLC-POS (A), RPLC-NEG (B), HILIC-POS (C), and HILIC-NEG (D) modes, respectively. Samples with different treatments in (A–D) are illustrated at the bottom of the figure. DMSO: dimethyl sulfoxide; 16  $\mu$ M: 16  $\mu$ M AFB1; 32  $\mu$ M: 32  $\mu$ M AFB1.

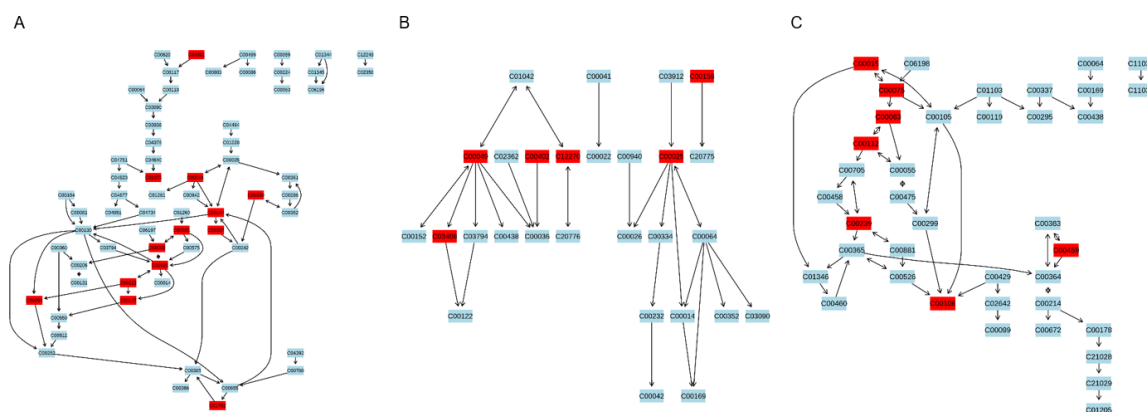

**Figure S2.** Venn diagram depicting overlap of metabolites in Hep3B cells differed significantly between each dose of AFB1 treatment groups and the control group measured by four combined modes (RPLC-POS, RPLC-NEG, HILIC-POS, and HILIC-NEG).

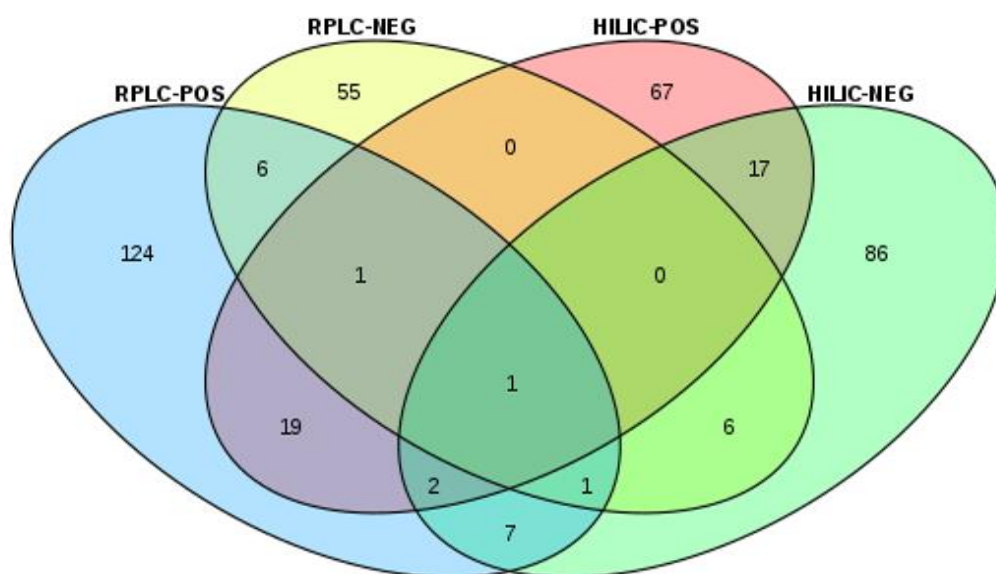

**Figure S3.** Constructions of the top three significantly altered metabolism pathways using the reference map by KEGG from 16  $\mu$ M vs. DMSO comparison. CO represents the entry number of compound and the red ones were metabolites identified in this study: (A) Purine metabolism; (B) Alanine, aspartate and glutamate metabolism; (C) Pyrimidine metabolism.
