# Supplementary material for: Comprehensive Metabolomic Analysis Reveals Dynamic Metabolic Reprogramming in Hep3B Cells with Aflatoxin B1 Exposure
Source: Toxins (Basel). 2021 May 27;13(6):384. doi: 10.3390/toxins13060384 (PMC8229485; doi:10.3390/toxins13060384)
Supplement: Supplementary file 1 [file toxins-13-00384-s001.zip]

Archive with 7 entries (7 files):
- Table S1.xlsx
- Table S2.xlsx
- Table S3.xlsx
- Table S4.xlsx
- Table S5.xlsx
- Table S6.xlsx
- toxins-1205213 SU Figures.pdf
