# Supplementary material for: Comprehensive Metabolomic Analysis Reveals Dynamic Metabolic Reprogramming in Hep3B Cells with Aflatoxin B1 Exposure
Source: Toxins (Basel). 2021 May 27;13(6):384. doi: 10.3390/toxins13060384 (PMC8229485; doi:10.3390/toxins13060384)
Supplement: Supplementary file 1 [file toxins-13-00384-s001.zip › Table S1.xlsx]

## Sheet: Sheet1
Table S1. The identification rates and differential metabolite rates of four analysis modes
Acquision mode	Metabolite features	Identified metabolites	Differential features	Differential metabolites	Identification rate (IM/MF)	Differential metabolite rate (DM/DF)
RPLC-POS	25903	1227	680	161	4.7369	23.6765
RPLC-POS	11590	665	316	70	5.7377	22.1519
HILIC-POS	8174	825	401	107	10.093	26.6833
HILIC-NEG	5498	840	319	120	15.2783	37.6176
Total		2679		392
