# Supplementary material for: Comprehensive Metabolomic Analysis Reveals Dynamic Metabolic Reprogramming in Hep3B Cells with Aflatoxin B1 Exposure
Source: Toxins (Basel). 2021 May 27;13(6):384. doi: 10.3390/toxins13060384 (PMC8229485; doi:10.3390/toxins13060384)
Supplement: Supplementary file 1 [file toxins-13-00384-s001.zip › Table S2.xlsx]

## Sheet: RPLC_POS
Table S2. Identified 1227 metabolites from all samples by RPLC-POS analysis mode
Metabolite ID	Metabolic feature	m/z	Retention time (min)	Metabolite name	Formula	Score	Mass Error (ppm)	Mode
220233	6.97_544.3300m/z	544.33	7	Arg Asn Val Arg	C21H41N11O6	39.5	-2.7	RPLC-POS
18599	7.22_432.1785m/z	432.179	7.2	Tyr Tyr Ser	C21H25N3O7	39.6	4.7	RPLC-POS
75355	13.88_211.2045m/z	211.204	13.9	2-tetradecenal	C14H26O	39.6	-5.5	RPLC-POS
HMDB0031059	13.31_343.2247m/z	343.225	13.3	2-Hydroxy-6-(8,11,14-pentadecatrienyl)benzoic acid	C22H30O3	39.6	-6.2	RPLC-POS
29	1.38_116.0699m/z	116.07	1.4	L-Proline	C5H9NO2	39.7	-5.8	RPLC-POS
36193	13.34_357.2604m/z	357.26	13.3	13,14-dihydro-PGE1	C20H36O5	39.7	-8.9	RPLC-POS
45673	12.61_410.3253m/z	410.325	12.6	PGF2Î± diethyl amide	C24H43NO4	39.7	-2.9	RPLC-POS
HMDB0000138	9.80_466.3146m/z	466.315	9.8	Glycocholic acid	C26H43NO6	39.8	-3.7	RPLC-POS
3337	11.59_201.1021m/z	201.102	11.6	Harmalol	C12H12N2O	40	-0.7	RPLC-POS
15658	12.96_392.2562m/z	392.256	13	Leu Leu Phe	C21H33N3O4	40	4.6	RPLC-POS
20105	13.93_419.2420m/z	419.242	13.9	Met Arg Ile	C17H34N6O4S	40	-3.6	RPLC-POS
22124	18.79_288.1920m/z	288.192	18.8	Val Val Ala	C13H25N3O4	40	0.8	RPLC-POS
23134	5.78_373.2063m/z	373.206	5.8	Pro Glu Lys	C16H28N4O6	40	-4.9	RPLC-POS
34503	11.00_225.1948m/z	225.195	11	N,N'-Dicyclohexylurea	C13H24N2O	40	-6	RPLC-POS
45291	14.67_321.2389m/z	321.239	14.7	17(R)-HETE	C20H32O3	40	-11	RPLC-POS
264639	7.26_573.3586m/z	573.359	7.3	Leu Asn Ile Leu Thr	C26H48N6O8	40	-3.6	RPLC-POS
HMDB0000079	4.85_129.0646m/z	129.065	4.9	Dihydrothymine	C5H8N2O2	40	-9.7	RPLC-POS
HMDB0000325	8.18_191.0904m/z	191.09	8.2	3-Hydroxysuberic acid	C8H14O5	40	-5.4	RPLC-POS
HMDB0001201	2.10_444.0297m/z	444.03	2.1	Guanosine diphosphate	C10H15N5O11P2	40	-4.3	RPLC-POS
HMDB0008827	12.69_690.5015m/z	690.502	12.7	PE(14:0/18:1(11Z))	C37H72NO8P	40	-7.7	RPLC-POS
HMDB0011492	13.37_534.3529m/z	534.353	13.4	LysoPE(0:0/22:2(13Z,16Z))	C27H52NO7P	40	-4.7	RPLC-POS
HMDB0031602	14.11_101.0591m/z	101.059	14.1	4-Pentenoic acid	C5H8O2	40	-5.7	RPLC-POS
HMDB0038994	13.93_277.1787m/z	277.179	13.9	Ginsenoyne C	C17H24O3	40	-4	RPLC-POS
HMDB0060614	2.30_341.0997m/z	341.1	2.3	Sulindac sulfide	C20H17FO2S	40	-2.6	RPLC-POS
HMDB0060622	11.74_552.2592m/z	552.259	11.7	Endoxifen O-glucuronide	C31H37NO8	40	0.1	RPLC-POS
HMDB0112309	11.72_726.4336m/z	726.434	11.7	PS(14:1(9Z)/18:4(6Z,9Z,12Z,15Z))	C38H64NO10P	40	-0.7	RPLC-POS
HMDB0124993	2.36_234.9889m/z	234.989	2.4	4-hydroxy-3-(sulfooxy)benzoic acid	C7H6O7S	40	-7.6	RPLC-POS
HMDB0133162	12.46_219.1364m/z	219.136	12.5	(2Z)-2-[(2-hydroxyphenyl)methylidene]heptanal	C14H18O2	40	-7	RPLC-POS
112	11.02_145.1211m/z	145.121	11	Caprylic acid	C8H16O2	40.1	-8.4	RPLC-POS
6473	14.11_147.0640m/z	147.064	14.1	2,2-Dimethyl Succinic acid	C6H10O4	40.1	-8.2	RPLC-POS
19009	9.43_353.1474m/z	353.147	9.4	Asn Tyr Gly	C15H20N4O6	40.1	5.2	RPLC-POS
21588	11.88_335.1374m/z	335.137	11.9	Asn Ala Met	C12H22N4O5S	40.1	-3	RPLC-POS
65446	11.15_432.3090m/z	432.309	11.2	Malyngamide H	C26H41NO4	40.1	-4.2	RPLC-POS
125308	12.11_532.2795m/z	532.28	12.1	Asp Arg Asn Lys	C20H37N9O8	40.1	-8	RPLC-POS
264453	7.03_625.3026m/z	625.303	7	Leu Ser Phe Met Gln	C28H44N6O8S	40.1	1.9	RPLC-POS
HMDB0000806	15.70_229.2151m/z	229.215	15.7	Myristic acid	C14H28O2	40.1	-4.6	RPLC-POS
HMDB0003822	17.70_429.3710m/z	429.371	17.7	Cholesteryl acetate	C29H48O2	40.1	-3.9	RPLC-POS
HMDB0004231	18.65_206.1390m/z	206.139	18.7	Pantothenol	C9H19NO4	40.1	1.7	RPLC-POS
HMDB0008901	15.33_730.5368m/z	730.537	15.3	PE(15:0/20:2(11Z,14Z))	C40H76NO8P	40.1	-1.8	RPLC-POS
HMDB0011505	11.85_480.3064m/z	480.306	11.8	LysoPE(18:1(11Z)/0:0)	C23H46NO7P	40.1	-4.3	RPLC-POS
HMDB0012252	14.65_324.2882m/z	324.288	14.7	Linoleoyl ethanolamide	C20H37NO2	40.1	-4.7	RPLC-POS
HMDB0029586	11.37_270.3144m/z	270.314	11.4	Octadecylamine	C18H39N	40.1	-4.1	RPLC-POS
HMDB0031080	15.37_427.3564m/z	427.356	15.4	Momordenol	C29H46O2	40.1	-1.6	RPLC-POS
HMDB0033090	12.06_275.1641m/z	275.164	12.1	[6]-Dehydroshogaol	C17H22O3	40.1	-0.4	RPLC-POS
HMDB0036031	10.28_210.1842m/z	210.184	10.3	Labienoxime	C13H23NO	40.1	-4.8	RPLC-POS
HMDB0038955	10.70_280.0956m/z	280.096	10.7	Avenalumin II	C17H13NO3	40.1	-4.3	RPLC-POS
HMDB0039897	10.26_624.3931m/z	624.393	10.3	Hydroxyhomodestruxin B	C31H53N5O8	40.1	-5.7	RPLC-POS
HMDB0059980	9.80_371.1373m/z	371.137	9.8	4-Hydroxy-5-(phenyl)-valeric acid-O-glucuronide	C17H22O9	40.1	10	RPLC-POS
HMDB0094708	6.12_195.1215m/z	195.121	6.1	Tetraethylene glycol	C8H18O5	40.1	-6.2	RPLC-POS
1496	7.12_202.0856m/z	202.086	7.1	Carbaryl	C12H11NO2	40.2	-3.3	RPLC-POS
3600	7.71_569.2908m/z	569.291	7.7	Leukotriene F4	C28H44N2O8S	40.2	2.9	RPLC-POS
16294	12.56_292.1484m/z	292.148	12.6	Ser Ser Val	C11H21N3O6	40.2	-6.6	RPLC-POS
43570	8.24_156.1008m/z	156.101	8.2	ARECOLINE	C8H13NO2	40.2	-6.8	RPLC-POS
64661	7.71_267.1214m/z	267.121	7.7	(+)-2,5-epi Goniothalesdiol	C14H18O5	40.2	-4.8	RPLC-POS
96194	9.82_326.2107m/z	326.211	9.8	norpropoxyphene	C21H27NO2	40.2	-2.4	RPLC-POS
264668	7.93_631.3772m/z	631.377	7.9	Lys Ile Gln Asp Lys	C27H50N8O9	40.2	-0.3	RPLC-POS
HMDB0004833	18.05_862.6223m/z	862.622	18.1	Galabiosylceramide (d18:1/16:0)	C46H87NO13	40.2	-3.1	RPLC-POS
HMDB0007984	16.93_780.5508m/z	780.551	16.9	PC(16:0/20:5(5Z,8Z,11Z,14Z,17Z))	C44H78NO8P	40.2	-3.9	RPLC-POS
HMDB0010380	12.69_466.2930m/z	466.293	12.7	LysoPC(14:1(9Z))	C22H44NO7P	40.2	0.3	RPLC-POS
HMDB0011639	5.40_212.0543m/z	212.054	5.4	Topaquinone	C9H9NO5	40.2	-4.8	RPLC-POS
HMDB0012167	16.92_427.3551m/z	427.355	16.9	4alpha-Formyl-4beta-methyl-5alpha-cholesta-8,24-dien-3beta-ol	C29H46O2	40.2	-4.5	RPLC-POS
HMDB0015667	12.78_315.0915m/z	315.092	12.8	Sulfaphenazole	C15H14N4O2S	40.2	1.6	RPLC-POS
HMDB0029101	5.78_297.1065m/z	297.106	5.8	Tyrosyl-Aspartate	C13H16N2O6	40.2	-5.5	RPLC-POS
HMDB0030210	14.10_294.1511m/z	294.151	14.1	Koenimbine	C19H19NO2	40.2	7.6	RPLC-POS
HMDB0030531	7.26_630.3785m/z	630.379	7.3	Janthitrem G	C39H51NO6	40.2	-0.6	RPLC-POS
HMDB0034189	14.58_447.3078m/z	447.308	14.6	Taccagenin	C27H42O5	40.2	-6	RPLC-POS
HMDB0037780	16.89_505.3844m/z	505.384	16.9	Ganoderiol G	C31H52O5	40.2	-8.6	RPLC-POS
HMDB0040003	2.26_177.0569m/z	177.057	2.3	Methylthio 2-(propanoyloxy)propanoate	C7H12O3S	40.2	-5.9	RPLC-POS
HMDB0041947	5.46_230.1864m/z	230.186	5.5	N1,N8-Diacetylspermidine	C11H23N3O2	40.2	0.5	RPLC-POS
HMDB0061889	10.61_95.0845m/z	95.0845	10.6	(3E,5Z)-1,3,5-Heptatriene	C7H10	40.2	-11.1	RPLC-POS
15801	10.31_429.1894m/z	429.189	10.3	Trp Ser His	C20H24N6O5	40.3	3	RPLC-POS
19816	11.62_371.2027m/z	371.203	11.6	Ser His Lys	C15H26N6O5	40.3	-2.9	RPLC-POS
65467	12.02_198.1840m/z	198.184	12	N-methylundec-10-enamide	C12H23NO	40.3	-6.5	RPLC-POS
133023	8.44_504.2360m/z	504.236	8.4	Glu Gln Val Glu	C20H33N5O10	40.3	11.9	RPLC-POS
140022	7.27_522.2546m/z	522.255	7.3	Phe Asn Ile Glu	C24H35N5O8	40.3	-2.3	RPLC-POS
264263	8.79_550.2678m/z	550.268	8.8	Val Cys Asn Ser Lys	C21H39N7O8S	40.3	4.4	RPLC-POS
264871	13.55_572.3699m/z	572.37	13.6	Leu Ser Pro Lys Lys	C26H49N7O7	40.3	-11.9	RPLC-POS
HMDB0000557	14.41_132.1007m/z	132.101	14.4	L-Alloisoleucine	C6H13NO2	40.3	-8.9	RPLC-POS
HMDB0006485	6.19_472.1547m/z	472.155	6.2	10-Formyldihydrofolate	C20H21N7O7	40.3	-5.9	RPLC-POS
HMDB0008935	14.84_742.5378m/z	742.538	14.8	PE(16:0/20:3(5Z,8Z,11Z))	C41H76NO8P	40.3	-0.4	RPLC-POS
HMDB0014342	8.54_307.1098m/z	307.11	8.5	Fluconazole	C13H12F2N6O	40.3	-5	RPLC-POS
HMDB0015118	13.87_345.1837m/z	345.184	13.9	Formoterol	C19H24N2O4	40.3	8.1	RPLC-POS
HMDB0029236	2.65_492.1236m/z	492.124	2.7	Cyanidin 3-(6''-acetyl-galactoside)	C23H23O12+	40.3	-5.4	RPLC-POS
HMDB0060842	7.00_281.0947m/z	281.095	7	N-Despyridinyl rosiglitazone	C13H16N2O3S	40.3	-2.7	RPLC-POS
HMDB0061638	9.65_360.2731m/z	360.273	9.7	3-hydroxydodecanoyl carnitine	C19H37NO5	40.3	-3.8	RPLC-POS
18417	7.05_289.1894m/z	289.189	7	Ala Lys Ala	C12H24N4O4	40.4	8.4	RPLC-POS
19689	11.82_376.2595m/z	376.259	11.8	Lys Thr Lys	C16H33N5O5	40.4	10.7	RPLC-POS
21939	9.50_307.1101m/z	307.11	9.5	Asn Cys Ala	C10H18N4O5S	40.4	9.8	RPLC-POS
24090	13.78_317.3039m/z	317.304	13.8	Chimyl alcohol	C19H40O3	40.4	-3.5	RPLC-POS
43397	16.13_312.2886m/z	312.289	16.1	(Â±)13-Azaprostanoic acid	C19H37NO2	40.4	-3.6	RPLC-POS
45510	11.96_153.0897m/z	153.09	12	4-hydroxy Nonenal Alkyne	C9H12O2	40.4	-8.5	RPLC-POS
261713	13.62_539.2595m/z	539.259	13.6	Tyr Ser Asn Arg	C22H34N8O8	40.4	4.2	RPLC-POS
264685	12.78_550.2884m/z	550.288	12.8	Ser Leu Pro Tyr Ala	C26H39N5O8	40.4	2.2	RPLC-POS
HMDB0001999	15.19_303.2306m/z	303.231	15.2	Eicosapentaenoic acid	C20H30O2	40.4	-4.2	RPLC-POS
HMDB0003066	13.54_209.0949m/z	209.095	13.5	Chalcone	C15H12O	40.4	-5.5	RPLC-POS
HMDB0007930	16.92_714.5371m/z	714.537	16.9	PC(14:1(9Z)/P-18:1(11Z))	C40H76NO7P	40.4	-8.6	RPLC-POS
HMDB0009090	18.87_744.5594m/z	744.559	18.9	PE(18:2(9Z,12Z)/18:0)	C41H78NO8P	40.4	7.6	RPLC-POS
HMDB0010407	13.48_480.3432m/z	480.343	13.5	LysoPC(P-16:0)	C24H50NO6P	40.4	-3.4	RPLC-POS
HMDB0028730	1.31_262.1023m/z	262.102	1.3	Asparaginyl-Glutamic acid	C9H15N3O6	40.4	-3.9	RPLC-POS
HMDB0030368	11.29_145.1211m/z	145.121	11.3	(3R,5Z)-5-Octene-1,3-diol	C8H16O2	40.4	-8.5	RPLC-POS
HMDB0040015	9.84_164.1062m/z	164.106	9.8	2,3,4,5-Tetrahydro-6-(5-methyl-2-furanyl)pyridine	C10H13NO	40.4	-5	RPLC-POS
HMDB0060814	16.14_679.4374m/z	679.437	16.1	Descladinose roxithromycin	C33H62N2O12	40.4	-0.2	RPLC-POS
HMDB0061636	8.76_332.2418m/z	332.242	8.8	3-hydroxydecanoyl carnitine	C17H33NO5	40.4	-4	RPLC-POS
HMDB0128335	3.05_667.0767m/z	667.077	3	6-{6-carboxy-2-[3,4-dihydroxy-5-(3,4,5-trihydroxybenzoyloxy)benzoyloxy]-3,4-dihydroxyphenoxy}-3,4,5-trihydroxyoxane-2-carboxylic acid	C27H22O20	40.4	-1.6	RPLC-POS
36189	10.87_333.2047m/z	333.205	10.9	PGA3	C20H28O4	40.5	-4	RPLC-POS
262447	13.81_537.3380m/z	537.338	13.8	Tyr Val Lys Lys	C26H44N6O6	40.5	-2.9	RPLC-POS
264110	13.43_604.2660m/z	604.266	13.4	His Gly Tyr Val Glu	C27H37N7O9	40.5	-10.8	RPLC-POS
HMDB0000054	8.15_585.2684m/z	585.268	8.1	Bilirubin	C33H36N4O6	40.5	-4.1	RPLC-POS
HMDB0004284	11.96_139.0742m/z	139.074	12	Tyrosol	C8H10O2	40.5	-8.2	RPLC-POS
HMDB0008830	10.21_686.4677m/z	686.468	10.2	PE(14:0/18:3(6Z,9Z,12Z))	C37H68NO8P	40.5	-11.5	RPLC-POS
HMDB0011352	18.85_724.5255m/z	724.525	18.9	PE(P-16:0/20:4(5Z,8Z,11Z,14Z))	C41H74NO7P	40.5	-2.9	RPLC-POS
HMDB0013122	13.81_508.3749m/z	508.375	13.8	LysoPC(P-18:0)	C26H54NO6P	40.5	-2.5	RPLC-POS
HMDB0013625	16.78_350.3021m/z	350.302	16.8	Dihomo-gamma-Linolenoyl ethanolamide	C22H39NO2	40.5	-9.2	RPLC-POS
HMDB0034159	14.97_403.2309m/z	403.231	15	Acetyl tributyl citrate	C20H34O8	40.5	-4.4	RPLC-POS
HMDB0040367	9.27_309.1259m/z	309.126	9.3	Azacridone A	C18H16N2O3	40.5	8.2	RPLC-POS
HMDB0140986	2.79_325.1052m/z	325.105	2.8	4-hydroxy-3-[1-(2-hydroxyphenyl)-3-oxobutyl]-2H-chromen-2-one	C19H16O5	40.5	-5.9	RPLC-POS
17238	11.94_415.2108m/z	415.211	11.9	Lys His Met	C17H30N6O4S	40.6	-3.4	RPLC-POS
36592	10.61_183.1732m/z	183.173	10.6	2-dodecenal	C12H22O	40.6	-6.5	RPLC-POS
43997	12.83_408.3220m/z	408.322	12.8	MILTEFOSINE	C21H46NO4P	40.6	-4.2	RPLC-POS
44872	12.34_361.2726m/z	361.273	12.3	O-Arachidonoyl Glycidol	C23H36O3	40.6	-3.1	RPLC-POS
HMDB0008987	12.50_690.5045m/z	690.504	12.5	PE(18:0/14:1(9Z))	C37H72NO8P	40.6	-3.4	RPLC-POS
HMDB0009384	16.13_726.5076m/z	726.508	16.1	PE(20:4(5Z,8Z,11Z,14Z)/15:0)	C40H72NO8P	40.6	1	RPLC-POS
HMDB0009682	18.84_764.5260m/z	764.526	18.8	PE(22:6(4Z,7Z,10Z,13Z,16Z,19Z)/16:0)	C43H74NO8P	40.6	4.6	RPLC-POS
HMDB0011164	2.58_263.0861m/z	263.086	2.6	L-beta-aspartyl-L-glutamic acid	C9H14N2O7	40.6	-4.7	RPLC-POS
HMDB0011717	15.00_189.1110m/z	189.111	15	Nonate	C9H16O4	40.6	-6	RPLC-POS
HMDB0012240	11.59_364.2004m/z	364.2	11.6	Isopentenyladenine-9-N-glucoside	C17H25N5O4	40.6	6.8	RPLC-POS
HMDB0015194	18.70_462.1438m/z	462.144	18.7	Azlocillin	C20H23N5O6S	40.6	-0.9	RPLC-POS
HMDB0030199	14.84_501.3379m/z	501.338	14.8	Frangulanine	C28H44N4O4	40.6	-11.2	RPLC-POS
HMDB0030459	6.70_581.3135m/z	581.314	6.7	Hordatine B	C29H40N8O5	40.6	-10.2	RPLC-POS
HMDB0031678	15.13_336.3240m/z	336.324	15.1	Pipericine	C22H41NO	40.6	-6.4	RPLC-POS
HMDB0041201	10.94_277.1785m/z	277.178	10.9	Panaquinquecol 7	C17H24O3	40.6	-4.9	RPLC-POS
HMDB0060620	2.45_373.0873m/z	373.087	2.4	Sulindac sulfone	C20H17FO4S	40.6	-8.5	RPLC-POS
HMDB0129401	4.28_240.0492m/z	240.049	4.3	2-{[hydroxy(6-hydroxy-2H-1,3-benzodioxol-5-yl)methylidene]amino}acetic acid	C10H9NO6	40.6	-4.4	RPLC-POS
HMDB0135504	3.87_470.1423m/z	470.142	3.9	3-(3,4-dimethoxyphenyl)-N-[2-(3,4-dimethoxyphenyl)ethyl]-3-(sulfooxy)propanimidic acid	C21H27NO9S	40.6	-11.9	RPLC-POS
15841	13.54_351.1338m/z	351.134	13.5	Asn Ser Met	C12H22N4O6S	40.7	1.5	RPLC-POS
45199	12.52_315.2512m/z	315.251	12.5	(Â±)12,13-DiHOME	C18H34O4	40.7	-5.7	RPLC-POS
HMDB0000253	12.93_317.2454m/z	317.245	12.9	Pregnenolone	C21H32O2	40.7	-6.7	RPLC-POS
HMDB0008892	15.33_706.5376m/z	706.538	15.3	PE(15:0/18:0)	C38H76NO8P	40.7	-0.8	RPLC-POS
HMDB0008903	16.10_728.5216m/z	728.522	16.1	PE(15:0/20:3(8Z,11Z,14Z))	C40H74NO8P	40.7	-1.3	RPLC-POS
HMDB0011354	18.85_722.5100m/z	722.51	18.9	PE(P-16:0/20:5(5Z,8Z,11Z,14Z,17Z))	C41H72NO7P	40.7	-2.7	RPLC-POS
HMDB0028976	0.91_263.1454m/z	263.145	0.9	Methionyl-Isoleucine	C11H22N2O3S	40.7	11.5	RPLC-POS
HMDB0030057	12.96_413.2654m/z	413.265	13	Boviquinone 4	C26H36O4	40.7	-7.9	RPLC-POS
HMDB0031060	13.15_311.2567m/z	311.257	13.1	(R)-2-Hydroxysterculic acid	C19H34O3	40.7	-4.3	RPLC-POS
HMDB0032527	8.18_259.1165m/z	259.116	8.2	1,1'-(Tetrahydro-6a-hydroxy-2,3a,5-trimethylfuro[2,3-d]-1,3-dioxole-2,5-diyl)bis-ethanone	C12H18O6	40.7	-4.5	RPLC-POS
HMDB0035506	13.01_429.2985m/z	429.298	13	Schidigeragenin B	C27H40O4	40.7	-3.4	RPLC-POS
HMDB0094680	6.77_371.2268m/z	371.227	6.8	Octaethylene glycol	C16H34O9	40.7	-2.1	RPLC-POS
HMDB0112294	11.27_730.4568m/z	730.457	11.3	PS(14:0/18:3(6Z,9Z,12Z))	C38H68NO10P	40.7	-11.7	RPLC-POS
HMDB0133654	7.95_472.1729m/z	472.173	7.9	2-amino-4-({1-[(carboxymethyl)-C-hydroxycarbonimidoyl]-2-[(2,3-dihydroxy-2-methyl-1-phenylpropyl)sulfanyl]ethyl}-C-hydroxycarbonimidoyl)butanoic acid	C20H29N3O8S	40.7	-4	RPLC-POS
HMDB0134196	8.24_495.1891m/z	495.189	8.2	3,4,5-trihydroxy-6-[(14-hydroxy-3-methyl-1,7-dioxo-3,4,5,6,7,8,9,10-octahydro-1H-2-benzoxacyclotetradecin-16-yl)oxy]oxane-2-carboxylic acid	C24H30O11	40.7	6	RPLC-POS
1524	5.58_167.0803m/z	167.08	5.6	Nicotinamide, N-(2-hydroxyethyl)-	C8H10N2O2	40.8	-7.4	RPLC-POS
43559	13.97_225.0901m/z	225.09	14	DIBENZOYLMETHANE	C15H12O2	40.8	-4.1	RPLC-POS
171307	13.75_502.3353m/z	502.335	13.7	Lys Leu Asn Lys	C22H43N7O6	40.8	1	RPLC-POS
242461	7.44_459.2789m/z	459.279	7.4	Val Ile Leu Asp	C21H38N4O7	40.8	-5.3	RPLC-POS
HMDB0001261	10.04_661.3212m/z	661.321	10	Coproporphyrinogen III	C36H44N4O8	40.8	-3	RPLC-POS
HMDB0005771	6.31_457.2463m/z	457.246	6.3	Rigin	C18H32N8O6	40.8	-11.9	RPLC-POS
HMDB0006460	13.75_456.4026m/z	456.403	13.7	Arachidyl carnitine	C27H53NO4	40.8	-4.7	RPLC-POS
HMDB0010403	13.79_570.3512m/z	570.351	13.8	LysoPC(22:5(7Z,10Z,13Z,16Z,19Z))	C30H52NO7P	40.8	-7.4	RPLC-POS
HMDB0029295	9.79_344.1108m/z	344.111	9.8	Caffeoyl tyrosine	C18H17NO6	40.8	-5.9	RPLC-POS
HMDB0031565	11.96_167.1419m/z	167.142	12	Dihydrojasmone	C11H18O	40.8	-6.9	RPLC-POS
HMDB0032976	9.50_114.0361m/z	114.036	9.5	4,5-Dimethylthiazole	C5H7NS	40.8	-9.8	RPLC-POS
HMDB0034955	11.59_595.2245m/z	595.224	11.6	Zizybeoside II	C25H38O16	40.8	2.1	RPLC-POS
HMDB0041617	11.36_297.1323m/z	297.132	11.4	Chavicol O-beta-glucopyranoside	C15H20O6	40.8	-3.3	RPLC-POS
HMDB0062332	10.94_414.3049m/z	414.305	10.9	N-Docosahexaenoyl GABA	C26H39NO3	40.8	11.2	RPLC-POS
22144	6.14_417.2428m/z	417.243	6.1	Glu Leu Arg	C17H32N6O6	40.9	-6.8	RPLC-POS
22413	2.19_306.0918m/z	306.092	2.2	Asp Asp Gly	C10H15N3O8	40.9	-4.6	RPLC-POS
22913	5.95_402.2444m/z	402.244	5.9	Asn Ile Arg	C16H31N7O5	40.9	-3.9	RPLC-POS
43587	11.91_412.3237m/z	412.324	11.9	BENZETHONIUM	C27H41NO2	40.9	6.7	RPLC-POS
HMDB0006543	18.80_176.1170m/z	176.117	18.8	Debrisoquine	C10H13N3	40.9	-6.9	RPLC-POS
HMDB0009720	16.29_828.6474m/z	828.647	16.3	PE(24:0/18:2(9Z,12Z))	C47H90NO8P	40.9	-0.4	RPLC-POS
HMDB0014439	12.67_325.2161m/z	325.216	12.7	Etonogestrel	C22H28O2	40.9	-0.2	RPLC-POS
HMDB0031303	14.11_129.0533m/z	129.053	14.1	Osmundalactone	C6H8O3	40.9	-10.1	RPLC-POS
HMDB0031869	16.80_209.1523m/z	209.152	16.8	(S,E)-Lyratol propanoate	C13H20O2	40.9	-6.1	RPLC-POS
HMDB0038624	1.61_100.0208m/z	100.021	1.6	Thiiraneacetonitrile	C4H5NS	40.9	-7.5	RPLC-POS
HMDB0041500	2.46_167.0916m/z	167.092	2.5	1-Deoxy-D-glucitol	C6H14O5	40.9	1.1	RPLC-POS
HMDB0112529	12.50_840.5656m/z	840.566	12.5	PS(20:0/20:4(8Z,11Z,14Z,17Z))	C46H82NO10P	40.9	-11.1	RPLC-POS
HMDB0113934	18.76_782.5662m/z	782.566	18.8	PE-NMe2(15:0/22:4(7Z,10Z,13Z,16Z))	C44H80NO8P	40.9	-4.2	RPLC-POS
HMDB0129153	5.91_471.1389m/z	471.139	5.9	5-{4-[(E)-2-(2,4-dihydroxyphenyl)ethenyl]-6-hydroxy-2-(4-hydroxyphenyl)-2,3-dihydro-1-benzofuran-3-yl}benzene-1,3-diol	C28H22O7	40.9	-10.6	RPLC-POS
17869	12.67_367.1738m/z	367.174	12.7	His Pro Asn	C15H22N6O5	41	3.6	RPLC-POS
36188	11.26_331.1752m/z	331.175	11.3	Tetranor-PGFM	C16H26O7	41	0.1	RPLC-POS
235961	6.58_496.2000m/z	496.2	6.6	Thr Asn Phe Asp	C21H29N5O9	41	-7.7	RPLC-POS
HMDB0001180	5.34_232.0818m/z	232.082	5.3	N2-Succinyl-L-glutamic acid 5-semialdehyde	C9H13NO6	41	1.2	RPLC-POS
HMDB0006117	16.93_497.2777m/z	497.278	16.9	APGPR Enterostatin	C21H36N8O6	41	-10.8	RPLC-POS
HMDB0007877	16.25_726.5061m/z	726.506	16.2	PC(14:0/18:4(6Z,9Z,12Z,15Z))	C40H72NO8P	41	-1	RPLC-POS
HMDB0008727	15.49_834.6107m/z	834.611	15.5	PC(22:6(4Z,7Z,10Z,13Z,16Z,19Z)/18:0)	C48H84NO8P	41	12	RPLC-POS
HMDB0008904	15.40_726.5029m/z	726.503	15.4	PE(15:0/20:4(5Z,8Z,11Z,14Z))	C40H72NO8P	41	-5.5	RPLC-POS
HMDB0012316	14.65_864.6231m/z	864.623	14.7	3-O-Sulfogalactosylceramide (d18:1/22:0)	C46H89NO11S	41	0.2	RPLC-POS
HMDB0012381	13.94_786.5233m/z	786.523	13.9	PS(18:0/18:3(9Z,12Z,15Z))	C42H76NO10P	41	-5.9	RPLC-POS
HMDB0029016	2.35_245.1115m/z	245.112	2.3	Prolyl-Glutamate	C10H16N2O5	41	-6.8	RPLC-POS
HMDB0031742	5.88_462.1643m/z	462.164	5.9	4-(2-Nitroethyl)phenyl primeveroside	C19H27NO12	41	8	RPLC-POS
HMDB0033926	6.60_171.1119m/z	171.112	6.6	(3xi,6xi)-Cyclo(alanylvalyl)	C8H14N2O2	41	-5.6	RPLC-POS
HMDB0040021	8.62_180.1009m/z	180.101	8.6	2,3-Dihydro-5-(3-hydroxypropanoyl)-1H-pyrrolizine	C10H13NO2	41	-5.8	RPLC-POS
HMDB0040284	14.67_173.1312m/z	173.131	14.7	1,2-Dihydro-1,1,6-trimethylnaphthalene	C13H16	41	-7.4	RPLC-POS
HMDB0062632	12.59_477.2505m/z	477.25	12.6	1-O-all-trans-retinoyl-beta-glucuronic Acid	C26H36O8	41	4.6	RPLC-POS
HMDB0094704	8.15_206.0863m/z	206.086	8.1	N-Propionylmethionine	C8H15NO3S	41	8.7	RPLC-POS
HMDB0127954	16.66_371.0937m/z	371.094	16.7	3,4,5-trihydroxy-6-{[3-(4-hydroxy-3-methoxyphenyl)prop-2-enoyl]oxy}oxane-2-carboxylic acid	C16H18O10	41	-9.5	RPLC-POS
16568	4.65_405.2077m/z	405.208	4.6	Thr Arg Glu	C15H28N6O7	41.1	-3.8	RPLC-POS
20470	5.66_304.1841m/z	304.184	5.7	Ser Val Val	C13H25N3O5	41.1	-8.6	RPLC-POS
20677	10.08_400.2680m/z	400.268	10.1	Pro Arg Lys	C17H33N7O4	41.1	3.3	RPLC-POS
35860	14.53_295.2249m/z	295.225	14.5	9-OxoODE	C18H30O3	41.1	-6.2	RPLC-POS
44938	15.09_293.2459m/z	293.246	15.1	Î³-Linolenic Acid methyl ester	C19H32O2	41.1	-5.3	RPLC-POS
44958	15.36_343.2615m/z	343.261	15.4	Docosahexaenoic Acid methyl ester	C23H34O2	41.1	-4.9	RPLC-POS
HMDB0000285	5.25_484.9739m/z	484.974	5.3	Uridine triphosphate	C9H15N2O15P3	41.1	-4	RPLC-POS
HMDB0008182	16.16_802.5360m/z	802.536	16.2	PC(18:3(6Z,9Z,12Z)/20:5(5Z,8Z,11Z,14Z,17Z))	C46H76NO8P	41.1	-2.7	RPLC-POS
HMDB0008739	14.30_854.5787m/z	854.579	14.3	PC(22:6(4Z,7Z,10Z,13Z,16Z,19Z)/20:4(5Z,8Z,11Z,14Z))	C50H80NO8P	41.1	10.9	RPLC-POS
HMDB0011195	11.66_442.3504m/z	442.35	11.7	2-Hydroxy-3-methoxyestrone	C25H47NO5	41.1	-5.2	RPLC-POS
HMDB0014855	12.90_299.1992m/z	299.199	12.9	Norethindrone	C20H26O2	41.1	-4.5	RPLC-POS
HMDB0015398	7.39_212.1173m/z	212.117	7.4	Varenicline	C13H13N3	41.1	-4.2	RPLC-POS
HMDB0028956	1.99_275.2065m/z	275.206	2	Lysyl-Lysine	C12H26N4O3	41.1	-4.7	RPLC-POS
HMDB0034330	9.27_545.2047m/z	545.205	9.3	Physalin E	C28H32O11	41.1	5.5	RPLC-POS
HMDB0059735	5.78_127.0382m/z	127.038	5.8	5-Methylfuran-2-carboxylic acid	C6H6O3	41.1	-6.4	RPLC-POS
HMDB0115401	12.85_693.4494m/z	693.449	12.8	PA(22:6(4Z,7Z,10Z,13Z,16Z,19Z)/14:0)	C39H65O8P	41.1	0.7	RPLC-POS
3311	18.71_194.1165m/z	194.116	18.7	3,4-Methylenedioxymethamphetamine (MDMA)	C11H15NO2	41.2	-5.5	RPLC-POS
15902	6.46_409.1855m/z	409.185	6.5	Gly Trp Phe	C22H24N4O4	41.2	-3.8	RPLC-POS
19659	7.15_425.1836m/z	425.184	7.2	Phe Gln Met	C19H28N4O5S	41.2	-4	RPLC-POS
138807	14.64_559.3354m/z	559.335	14.6	Phe Lys His Lys	C27H42N8O5	41.2	0.5	RPLC-POS
192461	6.21_476.1971m/z	476.197	6.2	Asn Asp Leu Asp	C18H29N5O10	41.2	-3.4	RPLC-POS
245487	5.72_404.2482m/z	404.248	5.7	Val Ser Ala Lys	C17H33N5O6	41.2	-5.2	RPLC-POS
264473	9.46_490.2561m/z	490.256	9.5	Thr Gly Leu Ala Glu	C20H35N5O9	41.2	10.8	RPLC-POS
HMDB0002088	15.59_326.3043m/z	326.304	15.6	N-Oleoylethanolamine	C20H39NO2	41.2	-3.3	RPLC-POS
HMDB0013820	12.33_191.1783m/z	191.178	12.3	2-Methyl-2-phenyl-undecane	C14H22	41.2	-5.9	RPLC-POS
HMDB0014322	14.42_319.1654m/z	319.165	14.4	Fluvoxamine	C15H21F3N2O2	41.2	8.3	RPLC-POS
HMDB0028928	13.15_261.1473m/z	261.147	13.1	Leucyl-Glutamate	C11H20N2O5	41.2	10.7	RPLC-POS
HMDB0029123	3.67_233.1120m/z	233.112	3.7	Valyl-Aspartate	C9H16N2O5	41.2	-5	RPLC-POS
HMDB0030197	14.71_209.1151m/z	209.115	14.7	(Z)-3-Oxo-2-(2-pentenyl)-1-cyclopenteneacetic acid	C12H16O3	41.2	-10.2	RPLC-POS
HMDB0033569	11.36_113.0588m/z	113.059	11.4	Syoyualdehyde	C6H8O2	41.2	-8.4	RPLC-POS
HMDB0036122	9.64_459.2616m/z	459.262	9.6	[6]-Gingerdiol 4'-O-beta-D-glucopyranoside	C23H38O9	41.2	5.9	RPLC-POS
HMDB0038047	11.69_209.1523m/z	209.152	11.7	Carvyl propionate	C13H20O2	41.2	-6.4	RPLC-POS
HMDB0062439	12.53_285.0932m/z	285.093	12.5	9-Hydroxybenzo[a]pyrene-4,5-oxide	C20H12O2	41.2	7.7	RPLC-POS
HMDB0094807	9.57_214.1428m/z	214.143	9.6	2-nonenoylglycine	C11H19NO3	41.2	-4.4	RPLC-POS
21483	18.63_359.2026m/z	359.203	18.6	Ser Pro Arg	C14H26N6O5	41.3	-3.3	RPLC-POS
41155	11.88_495.1805m/z	495.181	11.9	Harpagoside	C24H30O11	41.3	-11.2	RPLC-POS
44957	14.24_269.2463m/z	269.246	14.2	cis-7-Hexadecenoic Acid methyl ester	C17H32O2	41.3	-4.7	RPLC-POS
45203	9.96_510.3164m/z	510.316	10	1,2-Dioctanoyl PC	C24H48NO8P	41.3	-5.2	RPLC-POS
HMDB0012986	13.91_572.2942m/z	572.294	13.9	Kinetensin 4-7	C26H37N9O6	41.3	0.3	RPLC-POS
HMDB0015305	7.70_233.0913m/z	233.091	7.7	Phenobarbital	C12H12N2O3	41.3	-3.2	RPLC-POS
HMDB0015566	12.30_691.3381m/z	691.338	12.3	Dalfopristin	C34H50N4O9S	41.3	1.4	RPLC-POS
HMDB0033613	6.12_740.3540m/z	740.354	6.1	Glabrin D	C36H49N7O10	41.3	-10	RPLC-POS
HMDB0033642	10.59_205.1421m/z	205.142	10.6	(2xi,3xi,6E)-3,7-Dimethyl-6-octene-1,2,3,8-tetrol	C10H20O4	41.3	-6.8	RPLC-POS
HMDB0036855	11.99_401.2149m/z	401.215	12	Cincassiol B	C20H32O8	41.3	-5.2	RPLC-POS
HMDB0037770	11.75_230.1520m/z	230.152	11.8	Neopellitorine A	C15H19NO	41.3	-8.4	RPLC-POS
HMDB0038108	16.80_181.1573m/z	181.157	16.8	cis-Quinceoxepane	C12H20O	41.3	-7.7	RPLC-POS
HMDB0040778	10.11_237.1475m/z	237.148	10.1	Eremopetasidione	C14H20O3	41.3	-4.1	RPLC-POS
HMDB0041296	2.23_325.1056m/z	325.106	2.2	Moracin K	C19H16O5	41.3	-4.6	RPLC-POS
16872	10.49_429.1893m/z	429.189	10.5	Ser His Trp	C20H24N6O5	41.4	2.7	RPLC-POS
17979	11.15_387.1795m/z	387.18	11.2	Lys Cys His	C15H26N6O4S	41.4	-3.5	RPLC-POS
23953	3.38_263.0860m/z	263.086	3.4	Asp Glu	C9H14N2O7	41.4	-5.1	RPLC-POS
182282	12.59_431.2482m/z	431.248	12.6	Leu Val Ala Glu	C19H34N4O7	41.4	-4.2	RPLC-POS
HMDB0000790	15.98_538.5176m/z	538.518	16	N-Palmitoylsphingosine	C34H67NO3	41.4	-3.3	RPLC-POS
HMDB0015414	9.72_528.2353m/z	528.235	9.7	Rolitetracycline	C27H33N3O8	41.4	2.3	RPLC-POS
HMDB0029978	13.46_297.2409m/z	297.241	13.5	Avenoleic acid	C18H32O3	41.4	-5.1	RPLC-POS
HMDB0030188	8.78_222.1842m/z	222.184	8.8	N-Isobutyl-2,4,8-decatrienamide	C14H23NO	41.4	-4.8	RPLC-POS
HMDB0030200	12.15_487.3252m/z	487.325	12.2	Hovenine A	C27H42N4O4	41.4	-5.5	RPLC-POS
HMDB0031567	13.55_161.0951m/z	161.095	13.6	3-Methyl-4-phenyl-3-buten-2-one	C11H12O	41.4	-6.4	RPLC-POS
HMDB0032112	17.37_317.3039m/z	317.304	17.4	1,2,4-Nonadecanetriol	C19H40O3	41.4	-3.7	RPLC-POS
HMDB0033349	6.84_234.0784m/z	234.078	6.8	Casimiroin	C12H11NO4	41.4	9.7	RPLC-POS
HMDB0033633	16.92_445.3670m/z	445.367	16.9	(3beta,5alpha,6beta,22E,24R)-23-Methylergosta-7,22-diene-3,5,6-triol	C29H48O3	41.4	-1.4	RPLC-POS
HMDB0034942	9.67_375.1302m/z	375.13	9.7	Geniposidic acid	C16H22O10	41.4	4.3	RPLC-POS
HMDB0040926	17.45_275.1634m/z	275.163	17.4	2-Butyl-5-[2-(4-hydroxy-3-methoxyphenyl)ethyl]furan	C17H22O3	41.4	-3	RPLC-POS
HMDB0041583	13.81_415.3186m/z	415.319	13.8	Setariol	C27H42O3	41.4	-5.1	RPLC-POS
HMDB0059644	1.47_684.1392m/z	684.139	1.5	(6S)-6-beta-hydroxy-1,4,5,6-tetrahydronicotinamide-adenine dinucleotide	C21H31N7O15P2	41.4	-5	RPLC-POS
HMDB0062715	1.35_204.0858m/z	204.086	1.4	N-acetyl-L-2-aminoadipate(2-)	C8H13NO5	41.4	-4.2	RPLC-POS
18160	9.60_425.1667m/z	425.167	9.6	Tyr Gln Asp	C18H24N4O8	41.5	0	RPLC-POS
21005	6.00_380.1468m/z	380.147	6	Glu Met Thr	C14H25N3O7S	41.5	-4.7	RPLC-POS
21401	5.98_447.1979m/z	447.198	6	Gln Tyr His	C20H26N6O6	41.5	-1.8	RPLC-POS
43460	8.62_222.1113m/z	222.111	8.6	HYDROCOTARNINE	C12H15NO3	41.5	-5.3	RPLC-POS
44723	15.00_149.0950m/z	149.095	15	Cuminaldehyde	C10H12O	41.5	-7.7	RPLC-POS
44990	1.22_110.0703m/z	110.07	1.2	2-Aminomethylpyrimidine (hydrochloride)	C5H7N3	41.5	-9.3	RPLC-POS
96644	11.91_330.3354m/z	330.335	11.9	(Â±)-CP 47,497-d11	C21H23D11O2	41.5	9.6	RPLC-POS
HMDB0008902	18.76_728.5216m/z	728.522	18.8	PE(15:0/20:3(5Z,8Z,11Z))	C40H74NO8P	41.5	-1.2	RPLC-POS
HMDB0008924	18.85_690.5061m/z	690.506	18.9	PE(16:0/16:1(9Z))	C37H72NO8P	41.5	-1.1	RPLC-POS
HMDB0008939	18.84_738.5059m/z	738.506	18.8	PE(16:0/20:5(5Z,8Z,11Z,14Z,17Z))	C41H72NO8P	41.5	-1.2	RPLC-POS
HMDB0012357	18.89_762.5272m/z	762.527	18.9	PS(16:0/18:1(9Z))	C40H76NO10P	41.5	-1	RPLC-POS
HMDB0036759	9.29_163.1478m/z	163.148	9.3	Pregeijerene	C12H18	41.5	-2.2	RPLC-POS
HMDB0041329	7.32_276.1254m/z	276.125	7.3	5-Amino-6-(4-hydroxy-2-butenoyl)-2,2-dimethyl-4-chromanone	C15H17NO4	41.5	8.5	RPLC-POS
HMDB0041928	13.75_303.2305m/z	303.231	13.7	Methenolone	C20H30O2	41.5	-4.4	RPLC-POS
HMDB0061019	12.83_764.4838m/z	764.484	12.8	14-hydroxyclarithromycin	C38H69NO14	41.5	6.2	RPLC-POS
HMDB0139876	7.80_234.1149m/z	234.115	7.8	3-(4-hydroxyphenyl)-N-(4-oxobutyl)prop-2-enimidic acid	C13H15NO3	41.5	10.3	RPLC-POS
21585	6.55_330.2005m/z	330.2	6.6	Ile Pro Thr	C15H27N3O5	41.6	-5.7	RPLC-POS
43413	14.27_524.3677m/z	524.368	14.3	enantio-PAF C-16	C26H54NO7P	41.6	-6.4	RPLC-POS
241241	6.53_508.2750m/z	508.275	6.5	Val Phe Lys Asp	C24H37N5O7	41.6	-3.1	RPLC-POS
HMDB0001241	2.85_158.0435m/z	158.043	2.8	2-Aminomuconic acid	C6H7NO4	41.6	-8.3	RPLC-POS
HMDB0006556	5.43_148.0594m/z	148.059	5.4	L-4-Hydroxyglutamate semialdehyde	C5H9NO4	41.6	-7.1	RPLC-POS
HMDB0029121	5.95_274.1854m/z	274.185	5.9	Valyl-Arginine	C11H23N5O3	41.6	-7.3	RPLC-POS
HMDB0032796	9.52_255.1212m/z	255.121	9.5	Methyl 3-(2,3-dihydroxy-3-methylbutyl)-4-hydroxybenzoate	C13H18O5	41.6	-5.9	RPLC-POS
HMDB0033337	5.90_432.2029m/z	432.203	5.9	Fusarin C	C23H29NO7	41.6	2.8	RPLC-POS
HMDB0036025	11.89_207.1365m/z	207.137	11.9	2,4,6-Trimethyl-4-phenyl-1,3-dioxane	C13H18O2	41.6	-6.8	RPLC-POS
HMDB0116634	12.82_869.5417m/z	869.542	12.8	PG(22:6(4Z,7Z,10Z,13Z,16Z,19Z)/22:5(4Z,7Z,10Z,13Z,16Z))	C50H77O10P	41.6	10.3	RPLC-POS
20301	14.34_373.2834m/z	373.283	14.3	Lys Ile Leu	C18H36N4O4	41.7	6.5	RPLC-POS
21842	1.46_276.1542m/z	276.154	1.5	Ala Val Ser	C11H21N3O5	41.7	-4.2	RPLC-POS
22553	5.77_366.1327m/z	366.133	5.8	Met Ser Glu	C13H23N3O7S	41.7	-0.8	RPLC-POS
46188	9.94_197.1525m/z	197.152	9.9	3,7-Dimethyl-2E,6-octadienyl acetate	C12H20O2	41.7	-5.7	RPLC-POS
242441	6.28_474.2901m/z	474.29	6.3	Val Ile Lys Asp	C21H39N5O7	41.7	-4.4	RPLC-POS
HMDB0002015	2.68_204.0319m/z	204.032	2.7	Cystathionine ketimine	C7H9NO4S	41.7	-2.8	RPLC-POS
HMDB0002248	13.91_262.1425m/z	262.142	13.9	Gamma glutamyl ornithine	C10H19N3O5	41.7	10.5	RPLC-POS
HMDB0012815	10.97_102.0907m/z	102.091	11	5-Aminopentanal	C5H11NO	41.7	-6	RPLC-POS
HMDB0029391	0.03_324.2160m/z	324.216	0	N-Jasmonoylisoleucine	C18H29NO4	41.7	-3	RPLC-POS
HMDB0034721	14.10_251.1635m/z	251.163	14.1	Procurcumadiol	C15H22O3	41.7	-2.7	RPLC-POS
HMDB0036821	13.69_209.1523m/z	209.152	13.7	3-Hydroxy-beta-ionone	C13H20O2	41.7	-6.1	RPLC-POS
HMDB0039939	6.00_208.1320m/z	208.132	6	Synephrine acetonide	C12H17NO2	41.7	-5.7	RPLC-POS
HMDB0062735	4.32_248.1482m/z	248.148	4.3	(R)-3-hydroxybutyrylcarnitine	C11H21NO5	41.7	-4.1	RPLC-POS
HMDB0128710	4.07_401.1086m/z	401.109	4.1	3,4,5-trihydroxy-6-{[6-(3-hydroxyprop-1-en-1-yl)-4-methoxy-2H-1,3-benzodioxol-5-yl]oxy}oxane-2-carboxylic acid	C17H20O11	41.7	2	RPLC-POS
187	1.79_257.2463m/z	257.246	1.8	Palmitic acid	C16H32O2	41.8	-4.5	RPLC-POS
68034	10.21_231.1002m/z	231.1	10.2	Kawain	C14H14O3	41.8	-6	RPLC-POS
85092	9.22_262.1469m/z	262.147	9.2	Santonine Oxime	C15H19NO3	41.8	12	RPLC-POS
130508	5.63_503.2810m/z	503.281	5.6	Glu Ile Asn Lys	C21H38N6O8	41.8	-2.7	RPLC-POS
215747	15.00_502.3151m/z	502.315	15	Arg Ala Gln Lys	C20H39N9O6	41.8	11	RPLC-POS
HMDB0000341	6.31_173.0798m/z	173.08	6.3	2-Octenedioic acid	C8H12O4	41.8	-6.3	RPLC-POS
HMDB0001046	6.42_177.1010m/z	177.101	6.4	Cotinine	C10H12N2O	41.8	-7	RPLC-POS
HMDB0001206	6.23_810.1312m/z	810.131	6.2	Acetyl-CoA	C23H38N7O17P3S	41.8	-2.3	RPLC-POS
HMDB0001373	5.95_688.1542m/z	688.154	5.9	Dephospho-CoA	C21H35N7O13P2S	41.8	-2.8	RPLC-POS
HMDB0015479	8.36_393.1075m/z	393.107	8.4	Tiotropium	C19H22NO4S2+	41.8	3	RPLC-POS
HMDB0030008	13.81_397.3100m/z	397.31	13.8	d-Tocotrienol	C27H40O2	41.8	-0.3	RPLC-POS
HMDB0030407	6.68_403.2540m/z	403.254	6.7	Merodesmosine	C18H34N4O6	41.8	-2.8	RPLC-POS
HMDB0034239	7.12_131.1055m/z	131.105	7.1	2-Methylpropyl propanoate	C7H14O2	41.8	-9.3	RPLC-POS
HMDB0034492	14.97_425.2128m/z	425.213	15	Dihydrovaltrate	C22H32O8	41.8	-9.9	RPLC-POS
HMDB0038790	11.36_161.0949m/z	161.095	11.4	3-Phenyl-4-pentenal	C11H12O	41.8	-7.3	RPLC-POS
HMDB0041955	8.33_290.1408m/z	290.141	8.3	Norcocaine	C16H19NO4	41.8	7.3	RPLC-POS
HMDB0132953	7.12_528.1988m/z	528.199	7.1	2-amino-4-({1-[(carboxymethyl)-C-hydroxycarbonimidoyl]-2-{[1-hydroxy-1-(4-methoxyphenyl)-4-methyl-3-oxopentan-2-yl]sulfanyl}ethyl}-C-hydroxycarbonimidoyl)butanoic acid	C23H33N3O9S	41.8	-4.2	RPLC-POS
17764	9.65_407.1555m/z	407.156	9.7	Ser Trp Asp	C18H22N4O7	41.9	-1.4	RPLC-POS
23822	4.13_233.1121m/z	233.112	4.1	Val Asp	C9H16N2O5	41.9	-4.8	RPLC-POS
258062	7.43_561.2686m/z	561.269	7.4	Tyr His Leu Glu	C26H36N6O8	41.9	3.3	RPLC-POS
265004	11.93_542.3231m/z	542.323	11.9	Leu Ala Pro Leu Glu	C25H43N5O8	41.9	8.5	RPLC-POS
HMDB0000197	9.50_176.0701m/z	176.07	9.5	Indoleacetic acid	C10H9NO2	41.9	-3	RPLC-POS
HMDB0000656	7.36_427.0936m/z	427.094	7.4	Cysteineglutathione disulfide	C13H22N4O8S2	41.9	-3.8	RPLC-POS
HMDB0003331	5.00_282.1185m/z	282.119	5	1-Methyladenosine	C11H15N5O4	41.9	-4	RPLC-POS
HMDB0010392	13.79_548.3690m/z	548.369	13.8	LysoPC(20:2(11Z,14Z))	C28H54NO7P	41.9	-3.8	RPLC-POS
HMDB0015500	12.22_301.2513m/z	301.251	12.2	Allylestrenol	C21H32O	41.9	-4.3	RPLC-POS
HMDB0028913	6.60_263.1399m/z	263.14	6.6	Isoleucyl-Methionine	C11H22N2O3S	41.9	-9.5	RPLC-POS
HMDB0029336	7.32_648.3783m/z	648.378	7.3	Nummularine A	C36H49N5O6	41.9	4.3	RPLC-POS
HMDB0032248	12.12_199.1684m/z	199.168	12.1	11-Dodecenoic acid	C12H22O2	41.9	-4.2	RPLC-POS
HMDB0038064	11.82_751.5110m/z	751.511	11.8	1,28-Dicaffeoyloctacosanediol	C46H70O8	41.9	-4.5	RPLC-POS
HMDB0038199	12.96_471.2357m/z	471.236	13	Lucidenic acid D1	C27H34O7	41.9	-4.4	RPLC-POS
HMDB0039132	13.97_353.1952m/z	353.195	14	[4]-Gingerdiol 3,5-diacetate	C19H28O6	41.9	-2	RPLC-POS
HMDB0040360	4.34_124.0745m/z	124.075	4.3	2-Acetyl-1-methylpyrrole	C7H9NO	41.9	-9.6	RPLC-POS
HMDB0040570	7.89_355.0638m/z	355.064	7.9	2-O-p-Coumaroylhydroxycitric acid	C15H14O10	41.9	-6.3	RPLC-POS
HMDB0059826	16.80_175.1469m/z	175.147	16.8	alpha-Ionene	C13H18	41.9	-6.8	RPLC-POS
HMDB0061640	10.53_388.3046m/z	388.305	10.5	3-hydroxytetradecanoyl carnitine	C21H41NO5	41.9	-2.9	RPLC-POS
HMDB0124940	3.99_156.9795m/z	156.98	4	2-(sulfooxy)acetic acid	C2H4O6S	41.9	-4	RPLC-POS
36285	10.31_319.2248m/z	319.225	10.3	12-oxo-ETE	C20H30O3	42	-6	RPLC-POS
264319	6.49_486.2906m/z	486.291	6.5	Val Leu Ser Pro Ala	C22H39N5O7	42	-3.4	RPLC-POS
HMDB0000244	8.90_377.1458m/z	377.146	8.9	Riboflavin	C17H20N4O6	42	0.7	RPLC-POS
HMDB0001043	15.87_305.2461m/z	305.246	15.9	Arachidonic acid	C20H32O2	42	-4.6	RPLC-POS
HMDB0011479	11.83_476.2758m/z	476.276	11.8	LysoPE(0:0/18:3(9Z,12Z,15Z))	C23H42NO7P	42	-2.9	RPLC-POS
HMDB0011616	5.77_330.0587m/z	330.059	5.8	Adenosine 2',3'-cyclic phosphate	C10H12N5O6P	42	-3.3	RPLC-POS
HMDB0014578	13.97_288.1733m/z	288.173	14	Cyproheptadine	C21H21N	42	-4.8	RPLC-POS
HMDB0028835	5.90_232.1385m/z	232.138	5.9	Glycyl-Arginine	C8H17N5O3	42	-8.4	RPLC-POS
HMDB0028892	5.88_303.1447m/z	303.145	5.9	Histidinyl-Phenylalanine	C15H18N4O3	42	-1.5	RPLC-POS
HMDB0029055	5.48_276.1653m/z	276.165	5.5	Threoninyl-Arginine	C10H21N5O4	42	-4.9	RPLC-POS
HMDB0029641	15.00_133.1000m/z	133.1	15	p-Mentha-1,3,5,8-tetraene	C10H12	42	-9.2	RPLC-POS
HMDB0031152	10.21_139.1105m/z	139.11	10.2	(3Z,6Z)-3,6-Nonadienal	C9H14O	42	-9.2	RPLC-POS
HMDB0035881	10.61_229.1785m/z	229.179	10.6	11-Hydroxy-9-tridecenoic acid	C13H24O3	42	-5.8	RPLC-POS
HMDB0060546	10.38_414.2627m/z	414.263	10.4	Norbuprenorphine	C25H35NO4	42	-2.9	RPLC-POS
HMDB0061087	11.77_404.2178m/z	404.218	11.8	3,4-Dihydroxy-tamoxifen	C26H29NO3	42	-10.5	RPLC-POS
HMDB0133167	14.98_221.1519m/z	221.152	15	2-benzyl-6-hydroxyheptanal	C14H20O2	42	-7.6	RPLC-POS
18077	3.65_348.1387m/z	348.139	3.7	Ala Glu Glu	C13H21N3O8	42.1	-4	RPLC-POS
21309	4.68_333.1868m/z	333.187	4.7	Gly Thr Arg	C12H24N6O5	42.1	-3.8	RPLC-POS
64811	10.03_335.1046m/z	335.105	10	RG-108	C19H14N2O4	42.1	6	RPLC-POS
96552	11.04_255.1589m/z	255.159	11	(-)-trans-C75	C14H22O4	42.1	-0.9	RPLC-POS
264194	10.13_624.3691m/z	624.369	10.1	Gly Arg Arg Val His	C25H45N13O6	42.1	0.5	RPLC-POS
HMDB0000014	2.24_228.0967m/z	228.097	2.2	Deoxycytidine	C9H13N3O4	42.1	-5.1	RPLC-POS
HMDB0013034	9.79_314.2679m/z	314.268	9.8	Palmitoylglycine	C18H35NO3	42.1	-3.5	RPLC-POS
HMDB0015359	8.40_353.2211m/z	353.221	8.4	Encainide	C22H28N2O2	42.1	-3.6	RPLC-POS
HMDB0029707	18.79_213.1118m/z	213.112	18.8	2-Amino-3,4-dimethylimidazo[4,5-f]quinoline	C12H12N4	42.1	-8	RPLC-POS
HMDB0031346	5.69_192.0851m/z	192.085	5.7	Calystegine C1	C7H13NO5	42.1	-7.8	RPLC-POS
HMDB0032330	1.46_85.0275m/z	85.0275	1.5	4-Hydroxy-2-butenoic acid gamma-lactone	C4H4O2	42.1	-11.2	RPLC-POS
HMDB0038665	7.66_305.1155m/z	305.116	7.7	L-N-(1H-Indol-3-ylacetyl)glutamic acid	C15H16N2O5	42.1	7.6	RPLC-POS
HMDB0061897	8.22_109.1000m/z	109.1	8.2	(Z)-1,3-Octadiene	C8H12	42.1	-11.1	RPLC-POS
HMDB0062517	11.91_386.3252m/z	386.325	11.9	Pentadecanoylcarnitine	C22H43NO4	42.1	-3.4	RPLC-POS
HMDB0112084	11.14_225.1475m/z	225.148	11.1	3-Methyl-5-pentyl-2-furanpropanoic acid	C13H20O3	42.1	-4.4	RPLC-POS
17272	5.60_375.1976m/z	375.198	5.6	Glu Ala Arg	C14H26N6O6	42.2	-2.8	RPLC-POS
21131	11.17_447.1993m/z	447.199	11.2	Trp Gln Asn	C20H26N6O6	42.2	1.5	RPLC-POS
23332	2.16_405.1956m/z	405.196	2.2	Glu Glu Lys	C16H28N4O8	42.2	-5.9	RPLC-POS
264794	6.58_582.2773m/z	582.277	6.6	Val Thr Phe Glu Ser	C26H39N5O10	42.2	0.6	RPLC-POS
HMDB0011470	11.46_426.2612m/z	426.261	11.5	LysoPE(0:0/14:0)	C19H40NO7P	42.2	-0.7	RPLC-POS
HMDB0012561	14.84_433.3652m/z	433.365	14.8	13'-Hydroxy-gamma-tocopherol	C28H48O3	42.2	-5.6	RPLC-POS
HMDB0032559	4.45_241.0807m/z	241.081	4.5	(Â±)-2-(1-Methylpropyl)-4,6-dinitrophenol	C10H12N2O5	42.2	-5.2	RPLC-POS
HMDB0032870	11.02_343.1718m/z	343.172	11	Jasmolone glucoside	C17H26O7	42.2	-9.8	RPLC-POS
HMDB0037606	12.15_221.1518m/z	221.152	12.2	13-Nor-6-eremophilene-8,11-dione	C14H20O2	42.2	-8	RPLC-POS
HMDB0041862	3.58_193.0331m/z	193.033	3.6	D-Glucaro-1,4-lactone	C6H8O7	42.2	-6.3	RPLC-POS
HMDB0133163	11.54_201.1260m/z	201.126	11.5	(2Z)-2-(phenylmethylidene)hept-6-enal	C14H16O	42.2	-6.8	RPLC-POS
21083	2.12_361.1809m/z	361.181	2.1	Asp Ala Arg	C13H24N6O6	42.3	-5.9	RPLC-POS
22044	3.41_391.1922m/z	391.192	3.4	Arg Ser Glu	C14H26N6O7	42.3	-3.5	RPLC-POS
96532	15.00_317.2462m/z	317.246	15	Eicosapentaenoic Acid methyl ester	C21H32O2	42.3	-4.2	RPLC-POS
130762	10.28_538.2488m/z	538.249	10.3	Glu Lys Phe Asp	C24H35N5O9	42.3	-3.7	RPLC-POS
HMDB0000600	9.17_325.1610m/z	325.161	9.2	Galactosylhydroxylysine	C12H24N2O8	42.3	1.3	RPLC-POS
HMDB0004135	6.82_519.1912m/z	519.191	6.8	Poly-g-D-glutamate	C20H30N4O12	42.3	-4	RPLC-POS
HMDB0006240	4.35_175.0854m/z	175.085	4.4	Demethylated antipyrine	C10H10N2O	42.3	-6.9	RPLC-POS
HMDB0015586	13.37_277.1786m/z	277.179	13.4	Cyclandelate	C17H24O3	42.3	-4.4	RPLC-POS
HMDB0036178	16.56_191.1420m/z	191.142	16.6	2-(3-Phenylpropyl)tetrahydrofuran	C13H18O	42.3	-5.6	RPLC-POS
HMDB0061634	7.64_304.2109m/z	304.211	7.6	3-hydroxyoctanoyl carnitine	C15H29NO5	42.3	-3.1	RPLC-POS
6632	5.05_137.0592m/z	137.059	5	2-Methylbenzoic acid	C8H8O2	42.4	-3.9	RPLC-POS
19110	3.46_405.2050m/z	405.205	3.5	Thr Glu Arg	C15H28N6O7	42.4	-10.5	RPLC-POS
44657	9.60_296.2007m/z	296.201	9.6	PRIDINOL	C20H25NO	42.4	-0.8	RPLC-POS
45067	15.74_311.2935m/z	311.294	15.7	Î”2-cis Eicosenoic Acid	C20H38O2	42.4	-3.1	RPLC-POS
HMDB0000630	2.04_112.0493m/z	112.049	2	Cytosine	C4H5N3O	42.4	-10.7	RPLC-POS
HMDB0013195	12.58_170.0953m/z	170.095	12.6	4-Aminobiphenyl	C12H11N	42.4	-6.8	RPLC-POS
HMDB0029028	6.87_302.1482m/z	302.148	6.9	Prolyl-Tryptophan	C16H19N3O3	42.4	-5.8	RPLC-POS
HMDB0029704	14.98_233.1874m/z	233.187	15	1-(2,6,6-Trimethyl-2-cyclohexen-1-yl)-1,6-heptadien-3-one	C16H24O	42.4	-11	RPLC-POS
HMDB0033862	14.00_299.2358m/z	299.236	14	3-(8,11,14-Pentadecatrienyl)phenol	C21H30O	42.4	-3.8	RPLC-POS
HMDB0112273	13.18_694.4713m/z	694.471	13.2	PS(14:0/15:0)	C35H68NO10P	42.4	8.5	RPLC-POS
HMDB0112884	16.29_848.6284m/z	848.628	16.3	PS(24:0/16:0)	C46H90NO10P	42.4	-10.7	RPLC-POS
962	9.39_316.2469m/z	316.247	9.4	Decanoyl-L-carnitine	C17H33NO4	42.5	-4.2	RPLC-POS
16760	5.93_388.2178m/z	388.218	5.9	Ile Gln Gln	C16H29N5O6	42.5	-3.3	RPLC-POS
23549	5.09_432.2547m/z	432.255	5.1	Glu Lys Arg	C17H33N7O6	42.5	-4.1	RPLC-POS
36080	11.34_319.2248m/z	319.225	11.3	11(12)-EpETE	C20H30O3	42.5	-6.3	RPLC-POS
44487	9.11_191.0694m/z	191.069	9.1	HYMECROMONE METHYL ETHER	C11H10O3	42.5	-4.4	RPLC-POS
65298	5.60_327.0785m/z	327.078	5.6	Asp-Abu-OH	C13H14N2O8	42.5	-11.6	RPLC-POS
85051	16.66_342.2448m/z	342.245	16.7	5-Hydroxymethyltolterodine	C22H31NO2	42.5	6.1	RPLC-POS
263578	2.17_145.0479m/z	145.048	2.2	3,5-Dihydroxy-6-methyl-2,3-dihydro-4H-pyran-4-one	C6H8O4	42.5	-11.6	RPLC-POS
HMDB0015066	7.29_443.1472m/z	443.147	7.3	Methacycline	C22H22N2O8	42.5	5.2	RPLC-POS
HMDB0033850	5.83_451.1182m/z	451.118	5.8	Astilbin	C21H22O11	42.5	-11.9	RPLC-POS
HMDB0034590	9.50_419.0568m/z	419.057	9.5	Shoyuflavone C	C19H14O11	42.5	-9.9	RPLC-POS
HMDB0039317	17.45_419.3144m/z	419.314	17.4	Hexadecyl ferulate	C26H42O4	42.5	-2.8	RPLC-POS
18246	7.15_462.2339m/z	462.234	7.2	Lys Glu Trp	C22H31N5O6	42.6	-1.7	RPLC-POS
19688	1.49_379.1274m/z	379.127	1.5	Asp Asn Met	C13H22N4O7S	42.6	-2.2	RPLC-POS
20230	6.19_395.1915m/z	395.191	6.2	Val Asn Tyr	C18H26N4O6	42.6	-2.7	RPLC-POS
22351	14.30_435.1532m/z	435.153	14.3	Asp Asp Trp	C19H22N4O8	42.6	5.1	RPLC-POS
34491	10.34_272.2579m/z	272.258	10.3	2-aminohexadecanoic acid	C16H33NO2	42.6	-1.9	RPLC-POS
44157	12.25_318.2391m/z	318.239	12.2	DROFENINE	C20H31NO2	42.6	-11.6	RPLC-POS
85053	9.62_248.1267m/z	248.127	9.6	3',4'-Methylenedioxy-alpha-pyrrolidinopropiophenone	C14H17NO3	42.6	-5.6	RPLC-POS
HMDB0000262	6.02_127.0489m/z	127.049	6	Thymine	C5H6N2O2	42.6	-10	RPLC-POS
HMDB0004822	1.07_215.0869m/z	215.087	1.1	Methyl bisnorbiotinyl ketone	C9H14N2O2S	42.6	9.7	RPLC-POS
HMDB0006886	17.54_419.3496m/z	419.35	17.5	7a,12a-Dihydroxy-5a-cholestan-3-one	C27H46O3	42.6	-5.6	RPLC-POS
HMDB0008496	16.04_778.5389m/z	778.539	16	PC(20:5(5Z,8Z,11Z,14Z,17Z)/16:1(9Z))	C44H76NO8P	42.6	1	RPLC-POS
HMDB0010393	13.39_546.3509m/z	546.351	13.4	LysoPC(20:3(5Z,8Z,11Z))	C28H52NO7P	42.6	-8.4	RPLC-POS
HMDB0011237	16.26_716.5512m/z	716.551	16.3	PC(P-18:0/14:1(9Z))	C40H78NO7P	42.6	-10.7	RPLC-POS
HMDB0030992	6.76_187.0960m/z	187.096	6.8	5-Butyltetrahydro-2-oxo-3-furancarboxylic acid	C9H14O4	42.6	-2.5	RPLC-POS
HMDB0040262	10.94_223.0629m/z	223.063	10.9	2,4,6-Triethyl-1,3,5-trithiane	C9H18S3	42.6	-6.5	RPLC-POS
HMDB0060511	10.03_569.1712m/z	569.171	10	SN38 glucuronide	C28H28N2O11	42.6	-9.4	RPLC-POS
22402	7.00_457.2437m/z	457.244	7	Tyr Phe Lys	C24H32N4O5	42.7	-1.8	RPLC-POS
HMDB0000889	6.97_516.3009m/z	516.301	7	Tauroursocholic acid	C26H45NO7S	42.7	3.8	RPLC-POS
HMDB0011513	14.00_506.3222m/z	506.322	14	LysoPE(20:2(11Z,14Z)/0:0)	C25H48NO7P	42.7	-3.7	RPLC-POS
HMDB0031315	6.17_307.1750m/z	307.175	6.2	1-(beta-D-Glucopyranosyloxy)-3-octanone	C14H26O7	42.7	-0.5	RPLC-POS
HMDB0033023	7.75_531.2913m/z	531.291	7.7	7,12-Dihydroxy-3,11,15,23-tetraoxolanost-8-en-26-oic acid	C30H42O8	42.7	-7.4	RPLC-POS
HMDB0034666	4.35_134.0591m/z	134.059	4.4	(Â±)-2-Hydroxy-2-phenylacetonitrile	C8H7NO	42.7	-6.8	RPLC-POS
HMDB0040798	2.71_297.0898m/z	297.09	2.7	5-Hydroxy-4-methoxy-3-methyl-2,6-canthinedione	C16H12N2O4	42.7	9.6	RPLC-POS
HMDB0060543	11.80_304.1528m/z	304.153	11.8	6-Hydroxyetodolac	C17H21NO4	42.7	-5.2	RPLC-POS
16084	9.50_407.1562m/z	407.156	9.5	Asp Trp Ser	C18H22N4O7	42.8	0.1	RPLC-POS
45036	7.82_158.0981m/z	158.098	7.8	8-Isoquinoline methanamine (hydrochloride)	C11H11N	42.8	10.4	RPLC-POS
HMDB0001409	2.33_309.0488m/z	309.049	2.3	dUMP	C9H13N2O8P	42.8	1.8	RPLC-POS
HMDB0010383	12.11_494.3234m/z	494.323	12.1	LysoPC(16:1(9Z)/0:0)	C24H48NO7P	42.8	-1.5	RPLC-POS
HMDB0029389	6.29_136.0607m/z	136.061	6.3	(+)-threo-2-Amino-3,4-dihydroxybutanoic acid	C4H9NO4	42.8	2.3	RPLC-POS
HMDB0030305	11.61_222.1473m/z	222.147	11.6	Dioscorine	C13H19NO2	42.8	-6.8	RPLC-POS
HMDB0030990	7.63_201.1107m/z	201.111	7.6	alpha-Carboxy-delta-nonalactone	C10H16O4	42.8	-7.1	RPLC-POS
HMDB0033451	11.39_436.2259m/z	436.226	11.4	Cadabicine	C25H29N3O4	42.8	6.6	RPLC-POS
HMDB0035722	12.06_295.1896m/z	295.19	12.1	Tanacetol A	C17H26O4	42.8	-2.7	RPLC-POS
HMDB0041621	8.42_633.2389m/z	633.239	8.4	6'-Sialyllactosamine	C23H40N2O18	42.8	6.4	RPLC-POS
HMDB0060961	8.54_218.1193m/z	218.119	8.5	N-desisopropylpropranolol	C13H15NO2	42.8	8	RPLC-POS
HMDB0061822	15.74_283.1740m/z	283.174	15.7	Hexaethylene glycol	C12H26O7	42.8	-4	RPLC-POS
HMDB0133755	7.29_163.0749m/z	163.075	7.3	1-phenylbutane-2,3-dione	C10H10O2	42.8	-3	RPLC-POS
21572	6.57_330.1653m/z	330.165	6.6	Val Pro Asp	C14H23N3O6	42.9	-2.1	RPLC-POS
24076	16.19_331.2829m/z	331.283	16.2	1-Monopalmitin	C19H38O4	42.9	-4.3	RPLC-POS
44374	14.76_345.3348m/z	345.335	14.8	1-O-Octadecyl-sn-glycerol	C21H44O3	42.9	-4.5	RPLC-POS
154947	7.61_540.3299m/z	540.33	7.6	His Lys Gln Lys	C23H41N9O6	42.9	8.7	RPLC-POS
HMDB0029008	6.57_265.1520m/z	265.152	6.6	Phenylalanyl-Valine	C14H20N2O3	42.9	-10.1	RPLC-POS
HMDB0029504	10.54_233.1161m/z	233.116	10.5	Marindinin	C14H16O3	42.9	-4.9	RPLC-POS
HMDB0034714	11.78_237.1837m/z	237.184	11.8	Curdione	C15H24O2	42.9	-5.3	RPLC-POS
HMDB0036607	11.70_235.1320m/z	235.132	11.7	(S)-Pterosin P	C14H18O3	42.9	-3.6	RPLC-POS
HMDB0039656	9.89_204.1007m/z	204.101	9.9	5-(2-Furanyl)-1,2,3,4,5,6-hexahydro-7H-cyclopenta[b]pyridin-7-one	C12H13NO2	42.9	-5.8	RPLC-POS
HMDB0041085	12.72_454.2952m/z	454.295	12.7	Sambutoxin	C28H39NO4	42.9	0.1	RPLC-POS
HMDB0131684	14.22_207.0308m/z	207.031	14.2	4-hydroxy-2H,8H-[1,3]dioxolo[4,5-h]chromen-8-one	C10H6O5	42.9	9.5	RPLC-POS
3721	14.64_348.2882m/z	348.288	14.6	Arachidonoyl Ethanolamide	C22H37NO2	43	-4.4	RPLC-POS
23783	4.50_338.1809m/z	338.181	4.5	Tyr Arg	C15H23N5O4	43	-4.1	RPLC-POS
HMDB0001253	4.26_194.0435m/z	194.043	4.3	5,6-Dihydroxyindole-2-carboxylic acid	C9H7NO4	43	-6.7	RPLC-POS
HMDB0011487	18.87_502.2909m/z	502.291	18.9	LysoPE(0:0/20:4(5Z,8Z,11Z,14Z))	C25H44NO7P	43	-3.8	RPLC-POS
HMDB0029819	9.00_285.1318m/z	285.132	9	2-Phenylethyl beta-D-glucopyranoside	C14H20O6	43	-5.2	RPLC-POS
HMDB0030323	14.64_436.2468m/z	436.247	14.6	Paxilline	C27H33NO4	43	-3.4	RPLC-POS
HMDB0033462	8.55_251.1381m/z	251.138	8.6	4-Coumaroyl-2-hydroxyputrescine	C13H18N2O3	43	-3.7	RPLC-POS
HMDB0033831	3.85_297.0384m/z	297.038	3.9	Medicagol	C16H8O6	43	-3.4	RPLC-POS
HMDB0038546	11.67_529.2642m/z	529.264	11.7	ent-6R,16bOH,17-Trihydroxy-7-oxo-6,7-seco-19,6-kauranolide 6-O-glucoside	C26H40O11	43	-0.4	RPLC-POS
HMDB0040668	11.05_373.2183m/z	373.218	11.1	Blumenol C glucoside	C19H32O7	43	-10.3	RPLC-POS
HMDB0041506	14.07_195.1006m/z	195.101	14.1	2-Benzyl-5-hydroxymethyl-1,3-dioxolane	C11H14O3	43	-5	RPLC-POS
HMDB0062555	5.88_262.1638m/z	262.164	5.9	hydroxyisovaleroyl carnitine	C12H23NO5	43	-4.2	RPLC-POS
89558	10.67_163.0750m/z	163.075	10.7	Cassiastearoptene	C10H10O2	43.1	-2.5	RPLC-POS
110223	6.29_419.2120m/z	419.212	6.3	Ala Thr Val Glu	C17H30N4O8	43.1	-4	RPLC-POS
HMDB0010401	14.85_572.3668m/z	572.367	14.9	LysoPC(22:4(7Z,10Z,13Z,16Z))	C30H54NO7P	43.1	-7.5	RPLC-POS
HMDB0015655	16.19_303.2307m/z	303.231	16.2	Methyltestosterone	C20H30O2	43.1	-3.8	RPLC-POS
HMDB0032052	10.61_211.1684m/z	211.168	10.6	alpha-Terpineol propanoate	C13H22O2	43.1	-3.9	RPLC-POS
HMDB0037873	6.84_154.1215m/z	154.122	6.8	4-Ethyl-2-methyl-5-propyloxazole	C9H15NO	43.1	-7.4	RPLC-POS
HMDB0039976	6.55_367.1947m/z	367.195	6.6	(1R*,2R*,4R*,8S*)-p-Menthane-1,2,8,9-tetrol 9-glucoside	C16H30O9	43.1	-4.2	RPLC-POS
HMDB0059631	12.88_197.0945m/z	197.094	12.9	Cis-stilbene oxide	C14H12O	43.1	-8.1	RPLC-POS
HMDB0060661	7.95_619.2741m/z	619.274	7.9	APC	C33H38N4O8	43.1	-3.5	RPLC-POS
HMDB0112093	14.91_295.2258m/z	295.226	14.9	5-Heptyl-2-furanheptanoic acid	C18H30O3	43.1	-3.2	RPLC-POS
3407	14.38_283.2619m/z	283.262	14.4	Vaccenic acid	C18H34O2	43.2	-4.5	RPLC-POS
17791	6.23_423.2235m/z	423.223	6.2	Tyr Gln Ile	C20H30N4O6	43.2	-0.8	RPLC-POS
23393	9.94_346.1790m/z	346.179	9.9	Pro Met Val	C15H27N3O4S	43.2	-1.4	RPLC-POS
43437	11.07_340.2283m/z	340.228	11.1	S-Farnesyl-L-cysteine ME	C19H33NO2S	43.2	-6.5	RPLC-POS
HMDB0000517	2.27_175.1179m/z	175.118	2.3	L-Arginine	C6H14N4O2	43.2	-5.8	RPLC-POS
HMDB0008854	14.54_634.4487m/z	634.449	14.5	PE(14:1(9Z)/14:0)	C33H64NO8P	43.2	7	RPLC-POS
HMDB0033282	1.23_537.1930m/z	537.193	1.2	8-Hydroxypinoresinol 4-glucoside	C26H32O12	43.2	-6.9	RPLC-POS
HMDB0039161	5.86_306.1642m/z	306.164	5.9	Syndesine	C12H23N3O6	43.2	-5.9	RPLC-POS
HMDB0039713	17.55_463.3763m/z	463.376	17.6	(3beta,22R,23R,24S)-3,22,23-Trihydroxystigmastan-6-one	C29H50O4	43.2	-4.2	RPLC-POS
19426	7.22_344.2505m/z	344.25	7.2	Leu Leu Val	C17H33N3O4	43.3	-11.4	RPLC-POS
22021	5.77_363.1806m/z	363.181	5.8	Arg Met Gly	C13H26N6O4S	43.3	-0.8	RPLC-POS
155233	10.94_538.3482m/z	538.348	10.9	His Leu Ile Arg	C24H43N9O5	43.3	4.1	RPLC-POS
210622	10.94_488.2673m/z	488.267	10.9	Gln Ile Val Glu	C21H37N5O8	43.3	-8.7	RPLC-POS
HMDB0003609	2.45_88.0387m/z	88.0387	2.4	2-Aminoacrylic acid	C3H5NO2	43.3	-6.7	RPLC-POS
HMDB0012289	1.43_172.0593m/z	172.059	1.4	Tetrahydrodipicolinate	C7H9NO4	43.3	-6.7	RPLC-POS
HMDB0014558	8.81_325.1206m/z	325.121	8.8	Acetohexamide	C15H20N2O4S	43.3	-3.3	RPLC-POS
HMDB0029108	6.68_295.1642m/z	295.164	6.7	Tyrosyl-Isoleucine	C15H22N2O4	43.3	-3.4	RPLC-POS
HMDB0032358	9.46_288.2520m/z	288.252	9.5	Lauroyl diethanolamide	C16H33NO3	43.3	-4.5	RPLC-POS
HMDB0032930	18.73_136.0202m/z	136.02	18.7	Benzothiazole	C7H5NS	43.3	-9.8	RPLC-POS
HMDB0033939	10.61_312.1470m/z	312.147	10.6	Domoic acid	C15H21NO6	43.3	9.2	RPLC-POS
HMDB0034171	4.54_118.0639m/z	118.064	4.5	Benzeneacetonitrile	C8H7N	43.3	-10.2	RPLC-POS
HMDB0034263	8.18_277.1271m/z	277.127	8.2	Triethyl citrate	C12H20O7	43.3	-3.8	RPLC-POS
HMDB0035089	10.61_151.1106m/z	151.111	10.6	(R)-Carvone	C10H14O	43.3	-7.8	RPLC-POS
HMDB0040373	13.43_247.2042m/z	247.204	13.4	Ginsenoyne J	C17H26O	43.3	-5.9	RPLC-POS
HMDB0128662	15.45_223.0623m/z	223.062	15.4	3-(6-hydroxy-7-methoxy-2H-1,3-benzodioxol-5-yl)prop-2-enal	C11H10O5	43.3	9.9	RPLC-POS
17217	6.55_364.1528m/z	364.153	6.6	Glu Cys Leu	C14H25N3O6S	43.4	-2.5	RPLC-POS
264780	7.15_549.2690m/z	549.269	7.2	Met Leu Gly Gln Thr	C22H40N6O8S	43.4	-2	RPLC-POS
HMDB0003869	6.28_276.1582m/z	276.158	6.3	Epsilon-(gamma-Glutamyl)-lysine	C11H21N3O5	43.4	10.1	RPLC-POS
HMDB0006953	8.08_391.0638m/z	391.064	8.1	1-Phosphatidyl-D-myo-inositol	C11H19O13P	43.4	0.5	RPLC-POS
HMDB0010389	12.11_516.3045m/z	516.305	12.1	LysoPC(18:4(6Z,9Z,12Z,15Z))	C26H46NO7P	43.4	-7.7	RPLC-POS
HMDB0011692	2.96_324.0573m/z	324.057	3	Cytidine 2'-phosphate	C9H14N3O8P	43.4	-5.5	RPLC-POS
HMDB0028764	6.79_320.1228m/z	320.123	6.8	Aspartyl-Tryptophan	C15H17N3O5	43.4	-4	RPLC-POS
HMDB0033675	2.27_219.1329m/z	219.133	2.3	L-Lysopine	C9H18N2O4	43.4	-5	RPLC-POS
HMDB0035207	13.93_161.0948m/z	161.095	13.9	2-Phenyl-4-pentenal	C11H12O	43.4	-8	RPLC-POS
HMDB0041222	5.91_459.1714m/z	459.171	5.9	a-L-Fucopyranosyl-(1->2)-b-D-galactopyranosyl-(1->2)-D-xylose	C17H30O14	43.4	1.3	RPLC-POS
HMDB0041435	1.40_685.2380m/z	685.238	1.4	Citbismine C	C37H36N2O11	43.4	-1.7	RPLC-POS
HMDB0113930	16.11_752.5215m/z	752.522	16.1	PE-NMe2(15:0/20:5(5Z,8Z,11Z,14Z,17Z))	C42H74NO8P	43.4	-1.3	RPLC-POS
21889	11.94_432.2366m/z	432.237	11.9	Trp Ala Arg	C20H29N7O4	43.5	2.9	RPLC-POS
168767	6.25_551.3168m/z	551.317	6.2	Lys Glu Phe Lys	C26H42N6O7	43.5	-3.6	RPLC-POS
HMDB0000791	8.79_288.2164m/z	288.216	8.8	L-Octanoylcarnitine	C15H29NO4	43.5	-2	RPLC-POS
HMDB0011526	12.32_526.2963m/z	526.296	12.3	LysoPE(22:6(4Z,7Z,10Z,13Z,16Z,19Z)/0:0)	C27H44NO7P	43.5	6.7	RPLC-POS
HMDB0012161	4.44_233.1121m/z	233.112	4.4	4-(Glutamylamino) butanoate	C9H16N2O5	43.5	-4.7	RPLC-POS
HMDB0030419	1.82_263.0861m/z	263.086	1.8	gamma-Glutamylaspartic acid	C9H14N2O7	43.5	-4.8	RPLC-POS
HMDB0030471	8.36_171.0998m/z	171.1	8.4	1,4-Ipomeadiol	C9H14O3	43.5	-10.7	RPLC-POS
HMDB0032116	9.98_251.1267m/z	251.127	10	Helinorbisabone	C14H18O4	43.5	-4.4	RPLC-POS
HMDB0240217	5.93_271.0744m/z	271.074	5.9	3-(Cystein-S-yl)acetaminophen	C11H14N2O4S	43.5	-1.3	RPLC-POS
24070	13.45_482.3598m/z	482.36	13.4	Lyso-PAF C-16	C24H52NO6P	43.6	-1.5	RPLC-POS
HMDB0000596	10.45_462.3406m/z	462.341	10.4	Glucosylsphingosine	C24H47NO7	43.6	-4.1	RPLC-POS
HMDB0012838	13.91_339.2515m/z	339.252	13.9	6,7-dihydro-12-epi-LTB4	C20H34O4	43.6	-4.3	RPLC-POS
HMDB0013627	12.20_373.2717m/z	373.272	12.2	Cervonoyl ethanolamide	C24H36O3	43.6	-5.3	RPLC-POS
HMDB0028690	6.82_203.1380m/z	203.138	6.8	Alanyl-Isoleucine	C9H18N2O3	43.6	-5.2	RPLC-POS
HMDB0029545	6.88_389.1244m/z	389.124	6.9	3'-Hydroxy-4',5,6,7,8-pentamethoxyflavone	C20H20O8	43.6	3.4	RPLC-POS
HMDB0040498	12.82_605.3990m/z	605.399	12.8	3-Epipapyriferic acid	C35H56O8	43.6	-9.6	RPLC-POS
HMDB0112659	18.89_812.5402m/z	812.54	18.9	PS(20:4(8Z,11Z,14Z,17Z)/18:0)	C44H78NO10P	43.6	-4.2	RPLC-POS
HMDB0126703	6.62_469.1372m/z	469.137	6.6	2-(3,4-dihydroxyphenyl)-8-[3,4,5-trihydroxy-6-(hydroxymethyl)oxan-2-yl]-3,4-dihydro-2H-1-benzopyran-3,5,6,7-tetrol	C21H24O12	43.6	6.7	RPLC-POS
3428	11.80_300.2879m/z	300.288	11.8	3-ketosphinganine	C18H37NO2	43.7	-6	RPLC-POS
23924	3.91_189.1225m/z	189.123	3.9	Ala Val	C8H16N2O3	43.7	-4.6	RPLC-POS
85055	10.34_218.1525m/z	218.153	10.3	4'-Methyl-alpha-pyrrolidinopropiophenone	C14H19NO	43.7	-6.5	RPLC-POS
155967	5.90_545.2855m/z	545.286	5.9	His Asn Phe Lys	C25H36N8O6	43.7	4.5	RPLC-POS
220987	14.33_518.3091m/z	518.309	14.3	Arg Gln Ser Lys	C20H39N9O7	43.7	8.9	RPLC-POS
HMDB0002149	7.92_163.0377m/z	163.038	7.9	3 Hydroxycoumarin	C9H6O3	43.7	-8.1	RPLC-POS
HMDB0005935	14.33_275.2356m/z	275.236	14.3	Androstenol	C19H30O	43.7	-5	RPLC-POS
HMDB0014754	12.93_516.2934m/z	516.293	12.9	Candoxatril	C29H41NO7	43.7	-4.1	RPLC-POS
HMDB0028789	1.49_250.0866m/z	250.087	1.5	Cysteinyl-Gamma-glutamate	C8H15N3O4S	43.7	3.8	RPLC-POS
HMDB0034450	11.96_195.1371m/z	195.137	12	Neocnidilide	C12H18O2	43.7	-4.2	RPLC-POS
HMDB0059784	3.59_129.0171m/z	129.017	3.6	5-Hydroxy-2-furoic acid	C5H4O4	43.7	-9	RPLC-POS
HMDB0115405	12.67_719.4657m/z	719.466	12.7	PA(22:6(4Z,7Z,10Z,13Z,16Z,19Z)/16:1(9Z))	C41H67O8P	43.7	1.5	RPLC-POS
16013	5.52_395.2018m/z	395.202	5.5	Gly Tyr Arg	C17H26N6O5	43.8	-4.8	RPLC-POS
34547	11.64_304.2999m/z	304.3	11.6	1-hexadecylpyridinium	C21H37N	43.8	0.1	RPLC-POS
44013	13.18_434.3378m/z	434.338	13.2	ELAIDYLPHOSPHOCHOLINE	C23H48NO4P	43.8	-3.7	RPLC-POS
HMDB0001257	0.95_146.1642m/z	146.164	1	Spermidine	C7H19N3	43.8	-6.7	RPLC-POS
HMDB0004627	15.21_317.2461m/z	317.246	15.2	Calusterone	C21H32O2	43.8	-4.4	RPLC-POS
HMDB0013311	1.46_145.0484m/z	145.048	1.5	trans-2-Hexenedioic acid	C6H8O4	43.8	-7.9	RPLC-POS
HMDB0035306	11.94_221.1887m/z	221.189	11.9	Epishyobunone	C15H24O	43.8	-5.9	RPLC-POS
HMDB0036434	13.37_517.2781m/z	517.278	13.4	Lucidenic acid E2	C29H40O8	43.8	-2.9	RPLC-POS
HMDB0038003	4.52_598.1464m/z	598.146	4.5	Delphinidin 3-sambubioside	C26H29O16+	43.8	-10.7	RPLC-POS
HMDB0038580	13.20_325.2002m/z	325.2	13.2	Cibaric acid	C18H28O5	43.8	-2.2	RPLC-POS
HMDB0039837	9.71_168.1017m/z	168.102	9.7	2-(2-Furanyl)-3-piperidinol	C9H13NO2	43.8	-1.2	RPLC-POS
HMDB0040326	9.37_191.0693m/z	191.069	9.4	7-Hydroxy-2,5-dimethyl-4H-1-benzopyran-4-one	C11H10O3	43.8	-5.2	RPLC-POS
HMDB0040446	11.24_193.0847m/z	193.085	11.2	Benzyl acetoacetate	C11H12O3	43.8	-6.5	RPLC-POS
13	3.62_175.1173m/z	175.117	3.6	L-Arginine	C6H14N4O2	43.9	-9.3	RPLC-POS
6424	12.47_227.1994m/z	227.199	12.5	Myristoleic acid	C14H26O2	43.9	-5.1	RPLC-POS
16101	5.77_409.2061m/z	409.206	5.8	Phe Asp Lys	C19H28N4O6	43.9	-5	RPLC-POS
HMDB0000245	6.14_227.1015m/z	227.102	6.1	Porphobilinogen	C10H14N2O4	43.9	-4.8	RPLC-POS
HMDB0011129	14.19_482.3238m/z	482.324	14.2	LysoPE(0:0/18:0)	C23H48NO7P	43.9	-0.6	RPLC-POS
HMDB0015064	13.90_383.2783m/z	383.278	13.9	Misoprostol	C22H38O5	43.9	-2.3	RPLC-POS
HMDB0035177	5.95_200.0906m/z	200.091	5.9	2-Acetyl-1,5,6,7-tetrahydro-6-hydroxy-7-(hydroxymethyl)-4H-azepine-4-one	C9H13NO4	43.9	-5.8	RPLC-POS
HMDB0037562	16.80_227.1635m/z	227.163	16.8	Riesling acetal	C13H22O3	43.9	-3.1	RPLC-POS
HMDB0039644	12.14_251.1639m/z	251.164	12.1	Heliannuol A	C15H22O3	43.9	-1.1	RPLC-POS
HMDB0041937	1.25_462.1800m/z	462.18	1.2	Morphine-6-glucuronide	C23H27NO9	43.9	8.9	RPLC-POS
4289	3.53_257.2465m/z	257.246	3.5	Isopalmitic acid	C16H32O2	44	-4	RPLC-POS
21868	5.93_360.1398m/z	360.14	5.9	Glu Pro Asp	C14H21N3O8	44	-1	RPLC-POS
40945	12.15_383.2205m/z	383.22	12.2	PA(14:0/0:0)	C17H35O7P	44	3	RPLC-POS
HMDB0000991	1.43_160.1322m/z	160.132	1.4	DL-2-Aminooctanoic acid	C8H17NO2	44	-6.4	RPLC-POS
HMDB0006695	1.43_229.1171m/z	229.117	1.4	Prolylhydroxyproline	C10H16N2O4	44	-5	RPLC-POS
HMDB0008189	16.16_828.5485m/z	828.548	16.2	PC(18:3(6Z,9Z,12Z)/22:6(4Z,7Z,10Z,13Z,16Z,19Z))	C48H78NO8P	44	-6.4	RPLC-POS
HMDB0028897	3.82_319.1389m/z	319.139	3.8	Histidinyl-Tyrosine	C15H18N4O4	44	-3.6	RPLC-POS
HMDB0029006	7.64_352.1646m/z	352.165	7.6	Phenylalanyl-Tryptophan	C20H21N3O3	44	-2.9	RPLC-POS
HMDB0029067	5.86_251.1044m/z	251.104	5.9	Threoninyl-Methionine	C9H18N2O4S	44	-6.4	RPLC-POS
HMDB0036663	12.28_253.1787m/z	253.179	12.3	Hydroxypelenolide	C15H24O3	44	-4.6	RPLC-POS
HMDB0041488	13.15_276.1583m/z	276.158	13.1	4,5-Dihydropiperlonguminine	C16H21NO3	44	-3.9	RPLC-POS
HMDB0059622	8.65_177.0538m/z	177.054	8.7	4-Methylumbelliferone	C10H8O3	44	-4.6	RPLC-POS
63058	7.85_159.0909m/z	159.091	7.9	1-Benzylimidazole	C10H10N2	44.1	-5.2	RPLC-POS
96354	3.53_344.0894m/z	344.089	3.5	1-Anilino-9,10-dioxo-2-anthroic acid	C21H13NO4	44.1	-6.9	RPLC-POS
264374	12.53_642.2448m/z	642.245	12.5	Met Phe Thr Glu Asp	C27H39N5O11S	44.1	1.3	RPLC-POS
HMDB0000300	5.66_113.0335m/z	113.034	5.7	Uracil	C4H4N2O2	44.1	-9.1	RPLC-POS
HMDB0000902	4.25_665.1209m/z	665.121	4.2	NAD	C21H28N7O14P2+	44.1	-5	RPLC-POS
HMDB0001895	12.52_139.0377m/z	139.038	12.5	Salicylic acid	C7H6O3	44.1	-9.1	RPLC-POS
HMDB0008852	14.28_674.5065m/z	674.506	14.3	PE(14:0/P-18:1(11Z))	C37H72NO7P	44.1	-8.1	RPLC-POS
HMDB0009385	18.85_740.5225m/z	740.523	18.9	PE(20:4(5Z,8Z,11Z,14Z)/16:0)	C41H74NO8P	44.1	0.1	RPLC-POS
HMDB0028981	6.90_247.1102m/z	247.11	6.9	Methionyl-Proline	C10H18N2O3S	44.1	-3.6	RPLC-POS
HMDB0061642	11.39_416.3365m/z	416.336	11.4	3-hydroxyhexadecanoyl carnitine	C23H45NO5	44.1	-1.4	RPLC-POS
HMDB0062656	15.16_280.2623m/z	280.262	15.2	Linoleamide	C18H33NO	44.1	-4.3	RPLC-POS
HMDB0132981	11.80_179.1056m/z	179.106	11.8	1-(4-hydroxyphenyl)pentan-3-one	C11H14O2	44.1	-6.1	RPLC-POS
19738	7.22_455.1913m/z	455.191	7.2	Ser Tyr Trp	C23H26N4O6	44.2	-2.6	RPLC-POS
62321	16.41_357.2995m/z	357.3	16.4	MG(0:0/18:1(9Z)/0:0)	C21H40O4	44.2	-1.2	RPLC-POS
265067	1.23_132.0641m/z	132.064	1.2	N,N-Diacetyl-O-methylhydroxylamine	C5H9NO3	44.2	-10.5	RPLC-POS
HMDB0001903	16.34_417.3341m/z	417.334	16.3	Calcitriol	C27H44O3	44.2	-5.3	RPLC-POS
HMDB0002381	5.83_265.0844m/z	265.084	5.8	N-Acetylcystathionine	C9H16N2O5S	44.2	-3.3	RPLC-POS
HMDB0003357	1.84_175.1076m/z	175.108	1.8	N-Acetylornithine	C7H14N2O3	44.2	-0.4	RPLC-POS
HMDB0029668	12.74_209.1526m/z	209.153	12.7	Eremopetasinorol	C13H20O2	44.2	-4.9	RPLC-POS
HMDB0040980	11.64_311.1842m/z	311.184	11.6	Valdiate	C17H26O5	44.2	-3.6	RPLC-POS
HMDB0061017	18.63_165.1123m/z	165.112	18.6	1-Pyrimidinylpiperazine	C8H12N4	44.2	-6.9	RPLC-POS
17596	6.60_420.1867m/z	420.187	6.6	Trp Gln Ser	C19H25N5O6	44.3	-2.5	RPLC-POS
22029	14.22_383.2027m/z	383.203	14.2	Asn Leu His	C16H26N6O5	44.3	-2.8	RPLC-POS
23242	10.08_377.1923m/z	377.192	10.1	Ala Met Arg	C14H28N6O4S	44.3	-11.3	RPLC-POS
34507	11.80_151.0741m/z	151.074	11.8	2-Phenylpropionic acid	C9H10O2	44.3	-8.4	RPLC-POS
64626	13.57_258.2415m/z	258.242	13.6	D-erythro-Sphingosine C-15	C15H31NO2	44.3	-4.7	RPLC-POS
86395	10.92_133.1001m/z	133.1	10.9	p-Mentha-1,3,5,8-tetraene	C10H12	44.3	-8.5	RPLC-POS
HMDB0005849	15.27_291.2303m/z	291.23	15.3	4-Androstenediol	C19H30O2	44.3	-5.4	RPLC-POS
HMDB0013631	14.44_340.2846m/z	340.285	14.4	Oleoyl glycine	C20H37NO3	44.3	-0.1	RPLC-POS
HMDB0028693	10.62_221.0948m/z	221.095	10.6	Alanyl-Methionine	C8H16N2O3S	44.3	-2.9	RPLC-POS
HMDB0034672	12.53_209.1524m/z	209.152	12.5	(5alpha,8beta,9beta)-5,9-Epoxy-3,6-megastigmadien-8-ol	C13H20O2	44.3	-6	RPLC-POS
HMDB0036403	7.14_515.2982m/z	515.298	7.1	Ganosporelactone B	C30H42O7	44.3	-4.1	RPLC-POS
HMDB0038333	8.15_315.1086m/z	315.109	8.1	2-Hydroxyphenylacetic acid O-b-D-glucoside	C14H18O8	44.3	3.7	RPLC-POS
HMDB0041485	4.52_137.0590m/z	137.059	4.5	Benzyl formate	C8H8O2	44.3	-4.9	RPLC-POS
3302	3.91_175.0852m/z	175.085	3.9	Indole-3-acetamide	C10H10N2O	44.4	-7.8	RPLC-POS
181253	12.12_572.3990m/z	572.399	12.1	Leu Arg Lys Arg	C24H49N11O5	44.4	-0.1	RPLC-POS
264075	6.26_476.2696m/z	476.27	6.3	Ser Leu Ser Gly Leu	C20H37N5O8	44.4	-4	RPLC-POS
HMDB0001248	6.31_786.1629m/z	786.163	6.3	FAD	C27H33N9O15P2	44.4	-2	RPLC-POS
HMDB0011496	11.17_526.2925m/z	526.293	11.2	LysoPE(0:0/22:6(4Z,7Z,10Z,13Z,16Z,19Z))	C27H44NO7P	44.4	-0.6	RPLC-POS
HMDB0014410	13.60_204.1371m/z	204.137	13.6	Crotamiton	C13H17NO	44.4	-6	RPLC-POS
HMDB0034146	11.41_284.2934m/z	284.293	11.4	Octadecanamide	C18H37NO	44.4	-4.9	RPLC-POS
HMDB0037571	1.22_389.1213m/z	389.121	1.2	Demethylnobiletin	C20H20O8	44.4	-4.7	RPLC-POS
23988	5.97_217.1531m/z	217.153	6	Val Val	C10H20N2O3	44.5	-7.4	RPLC-POS
62807	10.36_145.0636m/z	145.064	10.4	1-Naphthol	C10H8O	44.5	-8.1	RPLC-POS
HMDB0000848	13.07_428.3721m/z	428.372	13.1	Stearoylcarnitine	C25H49NO4	44.5	-3	RPLC-POS
HMDB0011152	13.42_438.2971m/z	438.297	13.4	PE(P-16:0e/0:0)	C21H44NO6P	44.5	-1.7	RPLC-POS
HMDB0011495	11.41_528.3071m/z	528.307	11.4	LysoPE(0:0/22:5(7Z,10Z,13Z,16Z,19Z))	C27H46NO7P	44.5	-2.7	RPLC-POS
HMDB0011716	5.71_254.1011m/z	254.101	5.7	N-Acetylvanilalanine	C12H15NO5	44.5	-4.6	RPLC-POS
HMDB0028995	6.42_223.1066m/z	223.107	6.4	Phenylalanyl-Glycine	C11H14N2O3	44.5	-4.8	RPLC-POS
HMDB0033530	14.88_232.1683m/z	232.168	14.9	(2E,4E,6Z)-2,4,6-Decatrienoic acid dehydropiperidide	C15H21NO	44.5	-5.5	RPLC-POS
HMDB0034671	10.61_193.1577m/z	193.158	10.6	(E)-5,8-Megastigmadien-4-one	C13H20O	44.5	-4.9	RPLC-POS
HMDB0060508	11.12_417.3346m/z	417.335	11.1	Secalciferol	C27H44O3	44.5	-4.1	RPLC-POS
HMDB0112881	14.70_820.6050m/z	820.605	14.7	PS(24:0/14:0)	C44H86NO10P	44.5	-1.5	RPLC-POS
22055	5.83_403.2273m/z	403.227	5.8	Asp Ile Arg	C16H30N6O6	44.6	-6.5	RPLC-POS
84994	13.18_376.2443m/z	376.244	13.2	TUBERSTEMONINE	C22H33NO4	44.6	-10.4	RPLC-POS
HMDB0000265	8.98_651.7951m/z	651.795	9	Liothyronine	C15H12I3NO4	44.6	-3.4	RPLC-POS
HMDB0008951	15.64_702.5356m/z	702.536	15.6	PE(16:0/P-18:1(11Z))	C39H76NO7P	44.6	-10.8	RPLC-POS
HMDB0009477	14.45_722.5078m/z	722.508	14.5	PE(20:5(5Z,8Z,11Z,14Z,17Z)/P-16:0)	C41H72NO7P	44.6	-5.8	RPLC-POS
HMDB0011493	13.31_530.3220m/z	530.322	13.3	LysoPE(0:0/22:4(7Z,10Z,13Z,16Z))	C27H48NO7P	44.6	-4	RPLC-POS
HMDB0011504	12.06_452.2781m/z	452.278	12.1	LysoPE(16:1(9Z)/0:0)	C21H42NO7P	44.6	2	RPLC-POS
HMDB0011507	12.49_478.2917m/z	478.292	12.5	LysoPE(18:2(9Z,12Z)/0:0)	C23H44NO7P	44.6	-2.4	RPLC-POS
HMDB0032929	4.50_119.0483m/z	119.048	4.5	Benzofuran	C8H6O	44.6	-7.3	RPLC-POS
165	18.74_385.3445m/z	385.344	18.7	Vitamin D3 / Cholecalciferol (Vitamin D3) skeleton	C27H44O	44.7	-5.3	RPLC-POS
17136	9.94_393.1868m/z	393.187	9.9	Ser Arg Met	C14H28N6O5S	44.7	-11.8	RPLC-POS
19435	8.85_364.2217m/z	364.222	8.8	Phe Val Val	C19H29N3O4	44.7	-3.8	RPLC-POS
23331	6.84_485.2495m/z	485.249	6.8	Arg Tyr Phe	C24H32N6O5	44.7	-2.5	RPLC-POS
44415	11.97_365.1153m/z	365.115	12	10-HYDROXYCAMTOTHECIN	C20H16N2O5	44.7	5.6	RPLC-POS
45327	13.97_321.2408m/z	321.241	14	17(S)-HETE	C20H32O3	44.7	-5	RPLC-POS
264675	13.88_517.2773m/z	517.277	13.9	Glu Ala Ala Ala Arg	C20H36N8O8	44.7	8.6	RPLC-POS
HMDB0000935	2.65_581.0403m/z	581.04	2.7	Uridine diphosphate glucuronic acid	C15H22N2O18P2	44.7	-2.2	RPLC-POS
HMDB0011664	15.33_130.0637m/z	130.064	15.3	3-Methylene-indolenine	C9H7N	44.7	-10.7	RPLC-POS
HMDB0029112	6.92_329.1485m/z	329.149	6.9	Tyrosyl-Phenylalanine	C18H20N2O4	44.7	-3.2	RPLC-POS
HMDB0029139	6.11_281.1486m/z	281.149	6.1	Valyl-Tyrosine	C14H20N2O4	44.7	-3.6	RPLC-POS
HMDB0059614	6.31_439.0997m/z	439.1	6.3	Riboflavin cyclic-4',5'-phosphate	C17H19N4O8P	44.7	-3.7	RPLC-POS
HMDB0062804	1.58_194.0457m/z	194.046	1.6	L-dopachromate	C9H7NO4	44.7	5	RPLC-POS
17233	11.99_418.2418m/z	418.242	12	Arg Lys Asp	C16H31N7O6	44.8	2.3	RPLC-POS
HMDB0000226	1.76_157.0228m/z	157.023	1.8	Orotic acid	C5H4N2O4	44.8	-9.9	RPLC-POS
HMDB0000716	1.07_130.0853m/z	130.085	1.1	L-Pipecolic acid	C6H11NO2	44.8	-7.6	RPLC-POS
HMDB0028707	14.34_303.1790m/z	303.179	14.3	Arginyl-Glutamine	C11H22N6O4	44.8	4.9	RPLC-POS
HMDB0034126	9.91_297.0754m/z	297.075	9.9	Gyrocyanin	C17H12O5	44.8	-1.2	RPLC-POS
HMDB0062176	7.70_204.1220m/z	204.122	7.7	N-lactoyl-Leucine	C9H17NO4	44.8	-5.1	RPLC-POS
HMDB0062178	8.08_277.1168m/z	277.117	8.1	N-lactoyl-Tryptophan	C14H16N2O4	44.8	-5.3	RPLC-POS
41263	14.67_301.2146m/z	301.215	14.7	Dehydroabietic acid	C20H28O2	44.9	-5.5	RPLC-POS
85196	7.64_478.1836m/z	478.184	7.6	Pralatrexate	C23H23N7O5	44.9	0.5	RPLC-POS
265058	10.61_175.1471m/z	175.147	10.6	Ionene	C13H18	44.9	-5.6	RPLC-POS
HMDB0001190	5.91_160.0746m/z	160.075	5.9	Indoleacetaldehyde	C10H9NO	44.9	-7	RPLC-POS
HMDB0002056	16.32_223.0951m/z	223.095	16.3	Monoisobutyl phthalic acid	C12H14O4	44.9	-6.3	RPLC-POS
HMDB0010397	11.75_542.3225m/z	542.323	11.8	LysoPC(20:5(5Z,8Z,11Z,14Z,17Z))	C28H48NO7P	44.9	-2.9	RPLC-POS
HMDB0015535	12.75_359.1628m/z	359.163	12.8	Cilastatin	C16H26N2O5S	44.9	-2.1	RPLC-POS
HMDB0015541	8.27_381.1100m/z	381.11	8.3	Meticillin	C17H20N2O6S	44.9	-3.9	RPLC-POS
HMDB0035859	10.89_447.1996m/z	447.2	10.9	5'-O-Methylmelledonal	C24H30O8	44.9	-4	RPLC-POS
HMDB0036988	9.53_340.1567m/z	340.157	9.5	N-Methoxycarbonyl-N-nornuciferine	C20H21NO4	44.9	6.9	RPLC-POS
HMDB0037160	11.07_165.0899m/z	165.09	11.1	4-Methyl-2-phenyl-1,3-dioxolane	C10H12O2	44.9	-6.6	RPLC-POS
HMDB0041622	5.86_546.2029m/z	546.203	5.9	N-Acetylgalactosaminyl lactose	C20H35NO16	44.9	0.1	RPLC-POS
HMDB0062714	10.89_573.3017m/z	573.302	10.9	1-hexadecanoyl-sn-glycero-3-phospho-D-myo-inositol	C25H49O12P	44.9	-3.1	RPLC-POS
264067	6.53_416.2494m/z	416.249	6.5	Val Ala Gly Val Ala	C18H33N5O6	45	-2.3	RPLC-POS
HMDB0000736	6.31_232.1545m/z	232.154	6.3	Isobutyryl-L-carnitine	C11H21NO4	45	0.6	RPLC-POS
HMDB0001491	2.91_248.0308m/z	248.031	2.9	Pyridoxal 5'-phosphate	C8H10NO6P	45	-4.2	RPLC-POS
HMDB0029816	11.82_301.2515m/z	301.252	11.8	Cardanoldiene	C21H32O	45	-3.5	RPLC-POS
HMDB0030816	13.93_203.1055m/z	203.106	13.9	6-Acetyl-2,2-dimethyl-2H-1-benzopyran	C13H14O2	45	-5.6	RPLC-POS
HMDB0031199	9.09_114.0901m/z	114.09	9.1	2,5-Dihydro-2,4,5-trimethyloxazole	C6H11NO	45	-10.7	RPLC-POS
HMDB0034301	4.56_86.0961m/z	86.0961	4.6	Piperidine	C5H11N	45	-3.7	RPLC-POS
HMDB0034731	18.28_416.3541m/z	416.354	18.3	Tomatidine	C27H45NO2	45	4.3	RPLC-POS
HMDB0094687	12.50_426.3570m/z	426.357	12.5	Octadecenoylcarnitine	C25H47NO4	45	-1.8	RPLC-POS
18270	6.95_322.1751m/z	322.175	7	Gly Val Phe	C16H23N3O4	45.1	-3.3	RPLC-POS
20687	1.99_388.2903m/z	388.29	2	Leu Lys Lys	C18H37N5O4	45.1	-3.9	RPLC-POS
21444	5.63_439.2283m/z	439.228	5.6	Thr Tyr Arg	C19H30N6O6	45.1	-3.7	RPLC-POS
43452	17.69_359.3138m/z	359.314	17.7	Hexadecyl Acetyl Glycerol	C21H42O4	45.1	-5	RPLC-POS
HMDB0000726	7.00_232.1168m/z	232.117	7	Isovalerylglutamic acid	C10H17NO5	45.1	-5	RPLC-POS
HMDB0001564	1.46_447.0651m/z	447.065	1.5	CDP-Ethanolamine	C11H20N4O11P2	45.1	-5.8	RPLC-POS
HMDB0002366	6.58_244.1537m/z	244.154	6.6	Tiglylcarnitine	C12H21NO4	45.1	-2.8	RPLC-POS
HMDB0006236	5.03_121.0635m/z	121.064	5	Phenylacetaldehyde	C8H8O	45.1	-10.6	RPLC-POS
HMDB0011617	2.12_348.0697m/z	348.07	2.1	Adenosine 2'-phosphate	C10H14N5O7P	45.1	-1.9	RPLC-POS
HMDB0029011	5.93_272.1702m/z	272.17	5.9	Prolyl-Arginine	C11H21N5O3	45.1	-5.5	RPLC-POS
HMDB0034684	11.61_234.1474m/z	234.147	11.6	Thalictroidine	C14H19NO2	45.1	-6.4	RPLC-POS
HMDB0038913	12.52_151.1104m/z	151.11	12.5	4,6-Decadiyn-1-ol	C10H14O	45.1	-9.2	RPLC-POS
HMDB0139406	9.64_531.1803m/z	531.18	9.6	5,7-dihydroxy-2-(4-methoxyphenyl)-8-(3-methylbut-2-en-1-yl)-3-{[3,4,5-trihydroxy-6-(hydroxymethyl)oxan-2-yl]oxy}-4H-chromen-4-one	C27H30O11	45.1	-10.9	RPLC-POS
3723	12.91_356.3507m/z	356.351	12.9	Eicosanoyl-EA	C22H45NO2	45.2	-4.5	RPLC-POS
19369	6.25_395.2267m/z	395.227	6.2	Phe Thr Lys	C19H30N4O5	45.2	-5.5	RPLC-POS
23647	7.43_229.1538m/z	229.154	7.4	Pro Leu	C11H20N2O3	45.2	-4	RPLC-POS
62289	10.59_440.2769m/z	440.277	10.6	LysoPE(15:0/0:0)	C20H42NO7P	45.2	-0.5	RPLC-POS
214473	5.95_515.3285m/z	515.328	5.9	Gln Val Leu Arg	C22H42N8O6	45.2	-3	RPLC-POS
264998	6.49_602.3492m/z	602.349	6.5	Leu Thr Gln Gln Leu	C26H47N7O9	45.2	-2.6	RPLC-POS
HMDB0002719	13.23_385.3443m/z	385.344	13.2	Desmosterol	C27H44O	45.2	-5.8	RPLC-POS
HMDB0011174	6.36_229.1537m/z	229.154	6.4	Isoleucylproline	C11H20N2O3	45.2	-4.4	RPLC-POS
HMDB0033453	3.65_148.0954m/z	148.095	3.7	Fagomine	C6H13NO3	45.2	-9.6	RPLC-POS
HMDB0035639	13.63_235.1679m/z	235.168	13.6	Petasalbin	C15H22O2	45.2	-5.9	RPLC-POS
HMDB0036430	12.83_649.4257m/z	649.426	12.8	Momordicoside K	C37H60O9	45.2	-8.1	RPLC-POS
HMDB0059922	13.62_517.2796m/z	517.28	13.6	Cavipetin E isomer 1	C29H40O8	45.2	0	RPLC-POS
HMDB0062181	6.92_190.1060m/z	190.106	6.9	N-lactoyl-Valine	C8H15NO4	45.2	-7.5	RPLC-POS
HMDB0000321	1.29_163.0591m/z	163.059	1.3	2-Hydroxyadipic acid	C6H10O5	45.3	-6.3	RPLC-POS
HMDB0000512	8.52_208.0960m/z	208.096	8.5	N-Acetyl-L-phenylalanine	C11H13NO3	45.3	-3.7	RPLC-POS
HMDB0000714	7.24_180.0647m/z	180.065	7.2	Hippuric acid	C9H9NO3	45.3	-4.5	RPLC-POS
HMDB0000722	12.41_484.3081m/z	484.308	12.4	Lithocholyltaurine	C26H45NO5S	45.3	-2	RPLC-POS
HMDB0029383	7.11_353.0832m/z	353.083	7.1	Chlorogenoquinone	C16H16O9	45.3	-10.1	RPLC-POS
HMDB0031179	5.68_156.1371m/z	156.137	5.7	2,2,6,6-Tetramethyl-4-piperidinone	C9H17NO	45.3	-7.4	RPLC-POS
HMDB0060507	5.90_350.1009m/z	350.101	5.9	S-(Formylmethyl)glutathione	C12H19N3O7S	45.3	-2.2	RPLC-POS
HMDB0133595	10.36_163.0750m/z	163.075	10.4	(2Z)-2-(hydroxymethyl)-3-phenylprop-2-enal	C10H10O2	45.3	-2.2	RPLC-POS
64739	5.63_174.1474m/z	174.147	5.6	(+)-Muscarine	C9H19NO2	45.4	-8.3	RPLC-POS
90552	10.89_181.1211m/z	181.121	10.9	Dihydroactinidiolide	C11H16O2	45.4	-6.6	RPLC-POS
HMDB0000905	4.96_332.0741m/z	332.074	5	Deoxyadenosine monophosphate	C10H14N5O6P	45.4	-4	RPLC-POS
HMDB0008911	13.59_752.5159m/z	752.516	13.6	PE(15:0/22:5(4Z,7Z,10Z,13Z,16Z))	C42H74NO8P	45.4	-8.7	RPLC-POS
HMDB0009479	14.96_748.5287m/z	748.529	15	PE(20:5(5Z,8Z,11Z,14Z,17Z)/P-18:1(11Z))	C43H74NO7P	45.4	1.5	RPLC-POS
HMDB0010391	14.85_550.3846m/z	550.385	14.9	LysoPC(20:1(11Z))	C28H56NO7P	45.4	-3.8	RPLC-POS
HMDB0010394	14.58_546.3532m/z	546.353	14.6	LysoPC(20:3(8Z,11Z,14Z))	C28H52NO7P	45.4	-4	RPLC-POS
HMDB0014411	13.91_337.0692m/z	337.069	13.9	Dicumarol	C19H12O6	45.4	-4.2	RPLC-POS
HMDB0035993	9.87_253.0849m/z	253.085	9.9	N5-(3,4-Dioxo-1,5-cyclohexadien-1-yl)-L-glutamine	C11H12N2O5	45.4	11.7	RPLC-POS
HMDB0040804	9.40_755.2373m/z	755.237	9.4	Kaempferide 3-[rhamnopyranosyl-(1->6)-glucoside] 7-rhamnoside	C34H42O19	45.4	-2.7	RPLC-POS
23882	5.98_297.1070m/z	297.107	6	Asp Tyr	C13H16N2O6	45.5	-3.8	RPLC-POS
24011	6.42_295.1636m/z	295.164	6.4	Leu Tyr	C15H22N2O4	45.5	-5.4	RPLC-POS
46564	13.87_298.2728m/z	298.273	13.9	Palmitoleoyl-EA	C18H35NO2	45.5	-4.1	RPLC-POS
HMDB0011641	2.39_325.0423m/z	325.042	2.4	Uridine 2'-phosphate	C9H13N2O9P	45.5	-2.6	RPLC-POS
HMDB0015642	15.00_553.3250m/z	553.325	15	Arbekacin	C22H44N6O10	45.5	10.6	RPLC-POS
HMDB0028743	5.90_296.1231m/z	296.123	5.9	Asparaginyl-Tyrosine	C13H17N3O5	45.5	-3.3	RPLC-POS
HMDB0034170	4.52_123.0435m/z	123.044	4.5	2-Hydroxybenzaldehyde	C7H6O2	45.5	-4.2	RPLC-POS
HMDB0037711	15.42_291.2303m/z	291.23	15.4	4-Methylphenyl dodecanoate	C19H30O2	45.5	-5.2	RPLC-POS
HMDB0060611	7.96_208.1686m/z	208.169	8	N-Desmethyl tapentadol	C13H21NO	45.5	-4.7	RPLC-POS
HMDB0133048	14.30_279.1580m/z	279.158	14.3	2-[(3,3-dimethyloxiran-2-yl)methyl]-4-(3-methylbut-2-en-1-yl)benzene-1,3,5-triol	C16H22O4	45.5	-4	RPLC-POS
17829	11.12_369.1885m/z	369.189	11.1	Asn His Val	C15H24N6O5	45.6	1.2	RPLC-POS
18862	12.77_316.2239m/z	316.224	12.8	Ala Ile Leu	C15H29N3O4	45.6	2.4	RPLC-POS
20585	6.37_304.1847m/z	304.185	6.4	Thr Ala Ile	C13H25N3O5	45.6	-6.5	RPLC-POS
21953	8.89_338.1410m/z	338.141	8.9	Ser Thr Met	C12H23N3O6S	45.6	8.7	RPLC-POS
HMDB0000252	9.39_300.2881m/z	300.288	9.4	Sphingosine	C18H37NO2	45.6	-5.5	RPLC-POS
HMDB0001423	5.90_768.1211m/z	768.121	5.9	Coenzyme A	C21H36N7O16P3S	45.6	-1.8	RPLC-POS
HMDB0002335	2.45_231.0963m/z	231.096	2.4	Aspartyl-L-proline	C9H14N2O5	45.6	-5.2	RPLC-POS
HMDB0011671	4.17_622.0327m/z	622.033	4.2	ADP-ribose 1"-2" cyclic phosphate	C15H22N5O16P3	45.6	-3.3	RPLC-POS
HMDB0038915	12.19_181.0637m/z	181.064	12.2	12-Tridecene-4,6,8,10-tetraynal	C13H8O	45.6	-6.2	RPLC-POS
HMDB0061693	12.15_599.3172m/z	599.317	12.2	1-Oleoylglycerophosphoinositol	C27H51O12P	45.6	-3.1	RPLC-POS
96371	12.42_228.1372m/z	228.137	12.4	3-methyl-N-2-naphthylbutanamide	C15H17NO	45.7	-4.8	RPLC-POS
HMDB0000095	1.41_324.0580m/z	324.058	1.4	Cytidine monophosphate	C9H14N3O8P	45.7	-3.5	RPLC-POS
HMDB0000289	3.65_169.0345m/z	169.034	3.7	Uric acid	C5H4N4O3	45.7	-6.8	RPLC-POS
HMDB0001095	4.14_590.0877m/z	590.088	4.1	GDP-L-fucose	C16H25N5O15P2	45.7	-3	RPLC-POS
HMDB0028816	2.55_251.0685m/z	251.068	2.5	Glutamylcysteine	C8H14N2O5S	45.7	-4.6	RPLC-POS
HMDB0029022	5.72_244.1642m/z	244.164	5.7	Prolyl-Lysine	C11H21N3O3	45.7	-5.5	RPLC-POS
HMDB0029074	4.50_219.1329m/z	219.133	4.5	Threoninyl-Valine	C9H18N2O4	45.7	-4.6	RPLC-POS
HMDB0029117	6.26_345.1432m/z	345.143	6.3	Tyrosyl-Tyrosine	C18H20N2O5	45.7	-3.8	RPLC-POS
HMDB0037845	5.64_344.1324m/z	344.132	5.6	N-(1-Deoxy-1-fructosyl)tyrosine	C15H21NO8	45.7	-4.7	RPLC-POS
HMDB0144299	10.24_270.1843m/z	270.184	10.2	3-methyl-4-(methylamino)-1,2-diphenylbutan-2-ol	C18H23NO	45.7	-3.6	RPLC-POS
15957	6.71_434.2047m/z	434.205	6.7	Gln Thr Trp	C20H27N5O6	45.8	3	RPLC-POS
16041	6.06_346.1595m/z	346.16	6.1	Glu Pro Thr	C14H23N3O7	45.8	-4	RPLC-POS
18314	6.71_349.1496m/z	349.15	6.7	Gly Trp Ser	C16H20N4O5	45.8	-3.1	RPLC-POS
19941	5.98_375.2225m/z	375.223	6	Glu Val Lys	C16H30N4O6	45.8	-3.5	RPLC-POS
21467	6.28_375.1865m/z	375.186	6.3	Asn Glu Leu	C15H26N4O7	45.8	-2.6	RPLC-POS
40829	14.41_524.2954m/z	524.295	14.4	PS(18:1(9Z)/0:0)	C24H46NO9P	45.8	-5.5	RPLC-POS
44452	9.15_213.0536m/z	213.054	9.1	2-HYDROXYXANTHONE	C13H8O3	45.8	-4.7	RPLC-POS
263630	13.15_197.0796m/z	197.08	13.1	Atraric acid	C10H12O4	45.8	-6.1	RPLC-POS
HMDB0000897	4.31_166.0710m/z	166.071	4.3	7-Methylguanine	C6H7N5O	45.8	-8.1	RPLC-POS
HMDB0009388	14.41_766.5374m/z	766.537	14.4	PE(20:4(5Z,8Z,11Z,14Z)/18:1(11Z))	C43H76NO8P	45.8	-1	RPLC-POS
HMDB0010381	12.37_482.3232m/z	482.323	12.4	LysoPC(15:0)	C23H48NO7P	45.8	-1.9	RPLC-POS
HMDB0011475	13.13_480.3071m/z	480.307	13.1	LysoPE(0:0/18:1(11Z))	C23H46NO7P	45.8	-2.9	RPLC-POS
HMDB0028908	5.90_245.1489m/z	245.149	5.9	Isoleucyl-Hydroxyproline	C11H20N2O4	45.8	-2.9	RPLC-POS
HMDB0036684	16.78_193.1574m/z	193.157	16.8	2,4,5,7alpha-Tetrahydro-1,4,4,7a-tetramethyl-1H-inden-2-ol	C13H20O	45.8	-6.7	RPLC-POS
HMDB0028899	1.22_284.1330m/z	284.133	1.2	Histidinyl-Gamma-glutamate	C11H17N5O4	45.9	-8.2	RPLC-POS
HMDB0029104	5.75_311.1235m/z	311.124	5.8	Tyrosyl-Glutamate	C14H18N2O6	45.9	-0.8	RPLC-POS
HMDB0032589	13.76_221.1161m/z	221.116	13.8	1-(5-Acetyl-2-hydroxyphenyl)-3-methyl-1-butanone	C13H16O3	45.9	-4.9	RPLC-POS
HMDB0039386	3.35_491.2080m/z	491.208	3.4	Cymorcin diglucoside	C22H34O12	45.9	-8.7	RPLC-POS
HMDB0059611	2.23_148.0411m/z	148.041	2.2	Thiomorpholine 3-carboxylate	C5H9NO2S	45.9	-10.7	RPLC-POS
17387	7.66_421.2592m/z	421.259	7.7	Arg Val Phe	C20H32N6O4	46	8.1	RPLC-POS
214421	6.11_474.2541m/z	474.254	6.1	Gln Val Ile Asp	C20H35N5O8	46	-3.8	RPLC-POS
241962	12.37_531.2571m/z	531.257	12.4	Val His Phe Glu	C25H34N6O7	46	1.8	RPLC-POS
HMDB0000269	9.64_302.3041m/z	302.304	9.6	Sphinganine	C18H39NO2	46	-4.1	RPLC-POS
HMDB0000764	10.11_151.0742m/z	151.074	10.1	Hydrocinnamic acid	C9H10O2	46	-8	RPLC-POS
HMDB0013222	1.37_132.0763m/z	132.076	1.4	Beta-Guanidinopropionic acid	C4H9N3O2	46	-3.8	RPLC-POS
HMDB0029090	7.78_352.1644m/z	352.164	7.8	Tryptophyl-Phenylalanine	C20H21N3O3	46	-3.2	RPLC-POS
19	4.44_148.0592m/z	148.059	4.4	L-Glutamate	C5H9NO4	46.1	-8.2	RPLC-POS
20257	11.04_402.2416m/z	402.242	11	Arg Asn Leu	C16H31N7O5	46.1	-10.8	RPLC-POS
HMDB0000222	12.32_400.3427m/z	400.343	12.3	L-Palmitoylcarnitine	C23H45NO4	46.1	1.4	RPLC-POS
HMDB0010404	12.52_568.3387m/z	568.339	12.5	LysoPC(22:6(4Z,7Z,10Z,13Z,16Z,19Z))	C30H50NO7P	46.1	-1.9	RPLC-POS
HMDB0011474	7.34_452.2765m/z	452.276	7.3	LysoPE(0:0/16:1(9Z))	C21H42NO7P	46.1	-1.5	RPLC-POS
HMDB0011482	12.74_508.3385m/z	508.338	12.7	LysoPE(0:0/20:1(11Z))	C25H50NO7P	46.1	-2.5	RPLC-POS
HMDB0028830	6.93_334.1387m/z	334.139	6.9	Glutamyltryptophan	C16H19N3O5	46.1	-3.2	RPLC-POS
HMDB0031874	7.61_291.0998m/z	291.1	7.6	N-gamma-Glutamyl-S-allylcysteine	C11H18N2O5S	46.1	-3.9	RPLC-POS
HMDB0041480	17.11_283.2621m/z	283.262	17.1	(Z)-13-Octadecenoic acid	C18H34O2	46.1	-3.9	RPLC-POS
34514	3.73_134.0591m/z	134.059	3.7	4-Hydroxyindole	C8H7NO	46.2	-7.2	RPLC-POS
165821	6.14_433.2274m/z	433.227	6.1	Ile Ser Val Asp	C18H32N4O8	46.2	-4.4	RPLC-POS
HMDB0000078	2.39_179.0477m/z	179.048	2.4	Cysteinylglycine	C5H10N2O3S	46.2	-4.7	RPLC-POS
HMDB0000698	12.63_434.3255m/z	434.326	12.6	Lithocholic acid glycine conjugate	C26H43NO4	46.2	-2.2	RPLC-POS
HMDB0002210	3.73_152.0699m/z	152.07	3.7	2-Phenylglycine	C8H9NO2	46.2	-4.3	RPLC-POS
HMDB0035213	13.91_165.0896m/z	165.09	13.9	beta-Thujaplicin	C10H12O2	46.2	-8.9	RPLC-POS
HMDB0062175	7.98_238.1063m/z	238.106	8	N-lactoyl-Phenylalanine	C12H15NO4	46.2	-4.6	RPLC-POS
HMDB0062357	13.62_309.2054m/z	309.205	13.6	(6E,8E,10R,12Z)-10-Hydroxy-3-oxooctadecatrienoic acid	C18H28O4	46.2	-2.2	RPLC-POS
HMDB0094713	3.26_203.1380m/z	203.138	3.3	N-Acetylisoputreanine	C9H18N2O3	46.2	-5	RPLC-POS
16592	5.48_390.1963m/z	390.196	5.5	Glu Asn Lys	C15H27N5O7	46.3	-5.2	RPLC-POS
17921	5.28_361.1703m/z	361.17	5.3	Asp Val Gln	C14H24N4O7	46.3	-4.2	RPLC-POS
18811	11.22_343.2079m/z	343.208	11.2	Ala Pro Arg	C14H26N6O4	46.3	-2.6	RPLC-POS
21017	5.86_401.2852m/z	401.285	5.9	Ile Arg Leu	C18H36N6O4	46.3	-4.6	RPLC-POS
22907	6.76_407.2636m/z	407.264	6.8	Phe Lys Leu	C21H34N4O4	46.3	-4.2	RPLC-POS
96386	8.96_332.3147m/z	332.315	9	14(15)-EET-d11	C20H21D11O3	46.3	9.9	RPLC-POS
122508	6.25_489.2635m/z	489.263	6.2	Asp Ile Asn Lys	C20H36N6O8	46.3	-6.7	RPLC-POS
HMDB0000228	5.03_95.0483m/z	95.0483	5	Phenol	C6H6O	46.3	-8.5	RPLC-POS
HMDB0011484	14.47_504.3049m/z	504.305	14.5	LysoPE(0:0/20:3(11Z,14Z,17Z))	C25H46NO7P	46.3	-7.2	RPLC-POS
HMDB0011500	11.67_426.2603m/z	426.26	11.7	LysoPE(14:0/0:0)	C19H40NO7P	46.3	-2.8	RPLC-POS
HMDB0013286	9.69_244.1898m/z	244.19	9.7	N-Undecanoylglycine	C13H25NO3	46.3	-3.8	RPLC-POS
HMDB0028964	15.16_246.1840m/z	246.184	15.2	Lysyl-Valine	C11H23N3O3	46.3	11.2	RPLC-POS
HMDB0038935	9.98_269.1374m/z	269.137	10	Kamahine C	C14H20O5	46.3	-3.4	RPLC-POS
HMDB0040390	6.84_433.2549m/z	433.255	6.8	Erinacine B	C25H36O6	46.3	-8.2	RPLC-POS
HMDB0000206	1.79_189.1223m/z	189.122	1.8	N6-Acetyl-L-lysine	C8H16N2O3	46.4	-5.7	RPLC-POS
HMDB0000248	9.46_777.6914m/z	777.691	9.5	Thyroxine	C15H11I4NO4	46.4	-3.3	RPLC-POS
HMDB0013317	10.80_272.2211m/z	272.221	10.8	Tridecanoylglycine	C15H29NO3	46.4	-3.4	RPLC-POS
HMDB0032041	13.01_211.1105m/z	211.111	13	1,3-Diphenyl-1-propanone	C15H14O	46.4	-5.7	RPLC-POS
HMDB0061694	18.89_524.2964m/z	524.296	18.9	1-Oleoylglycerophosphoserine	C24H46NO9P	46.4	-3.6	RPLC-POS
20727	18.85_417.2441m/z	417.244	18.9	Leu Arg Glu	C17H32N6O6	46.5	-3.7	RPLC-POS
21169	1.55_361.1818m/z	361.182	1.5	Gly Glu Arg	C13H24N6O6	46.5	-3.3	RPLC-POS
HMDB0000973	2.35_98.9830m/z	98.983	2.3	Hydrogen phosphate	H3O4P	46.5	-11.8	RPLC-POS
HMDB0001273	5.63_523.9971m/z	523.997	5.6	Guanosine triphosphate	C10H16N5O14P3	46.5	-1.7	RPLC-POS
HMDB0003405	2.52_147.1114m/z	147.111	2.5	D-Lysine	C6H14N2O2	46.5	-9.8	RPLC-POS
HMDB0003892	5.78_194.1167m/z	194.117	5.8	(S)-N-Methylsalsolinol	C11H15NO2	46.5	-4.2	RPLC-POS
HMDB0006115	15.33_107.0484m/z	107.048	15.3	Benzaldehyde	C7H6O	46.5	-6.9	RPLC-POS
40874	14.05_485.2877m/z	485.288	14.1	PG(16:0/0:0)[U]	C22H45O9P	46.6	0.7	RPLC-POS
69897	13.28_327.0765m/z	327.077	13.3	Triphenyl phosphate	C18H15O4P	46.6	-4.7	RPLC-POS
175807	6.90_432.2791m/z	432.279	6.9	Leu Ala Thr Lys	C19H37N5O6	46.6	-6	RPLC-POS
HMDB0002096	9.60_204.1011m/z	204.101	9.6	3-Indolebutyric acid	C12H13NO2	46.6	-3.9	RPLC-POS
HMDB0008918	14.85_688.5194m/z	688.519	14.9	PE(15:0/P-18:1(11Z))	C38H74NO7P	46.6	-11.9	RPLC-POS
HMDB0012453	14.30_417.3346m/z	417.335	14.3	3 beta-Hydroxy-5-cholestenoate	C27H44O3	46.6	-4.2	RPLC-POS
HMDB0028804	6.37_294.1439m/z	294.144	6.4	Glutaminylphenylalanine	C14H19N3O4	46.6	-3.3	RPLC-POS
HMDB0061679	6.17_184.0960m/z	184.096	6.2	3,4,5,6-Tetrahydrohippuric acid	C9H13NO3	46.6	-4.6	RPLC-POS
HMDB0112461	13.49_840.5671m/z	840.567	13.5	PS(18:3(6Z,9Z,12Z)/22:1(13Z))	C46H82NO10P	46.6	-9.3	RPLC-POS
23550	7.85_467.1910m/z	467.191	7.9	Asp Phe Trp	C24H26N4O6	46.7	-3.3	RPLC-POS
23823	7.43_318.1806m/z	318.181	7.4	Leu Trp	C17H23N3O3	46.7	-1.8	RPLC-POS
264670	5.82_591.3073m/z	591.307	5.8	Arg Thr Leu Ser Asp	C23H42N8O10	46.7	-4	RPLC-POS
HMDB0000072	2.37_175.0222m/z	175.022	2.4	cis-Aconitic acid	C6H6O6	46.7	-8.9	RPLC-POS
HMDB0000828	1.94_177.0498m/z	177.05	1.9	Ureidosuccinic acid	C5H8N2O5	46.7	-4.3	RPLC-POS
HMDB0001508	3.70_412.0402m/z	412.04	3.7	dADP	C10H15N5O9P2	46.7	-3.9	RPLC-POS
HMDB0011478	12.99_476.2735m/z	476.273	13	LysoPE(0:0/18:3(6Z,9Z,12Z))	C23H42NO7P	46.7	-7.7	RPLC-POS
HMDB0029217	6.14_196.0957m/z	196.096	6.1	Tyrosine methylester	C10H13NO3	46.7	-5.8	RPLC-POS
HMDB0031956	7.29_381.1770m/z	381.177	7.3	Prenyl apiosyl-(1->6)-glucoside	C16H28O10	46.7	3.8	RPLC-POS
HMDB0038666	6.79_291.0999m/z	291.1	6.8	L-N-(1H-Indol-3-ylacetyl)aspartic acid	C14H14N2O5	46.7	8	RPLC-POS
HMDB0061714	15.34_337.3106m/z	337.311	15.3	Docosadienoate (22:2n6)	C22H40O2	46.7	1.4	RPLC-POS
15806	10.23_393.1869m/z	393.187	10.2	Ser Met Arg	C14H28N6O5S	46.8	-11.7	RPLC-POS
19134	6.50_286.1749m/z	286.175	6.5	Gly Pro Leu	C13H23N3O4	46.8	-4.5	RPLC-POS
264655	12.82_588.3729m/z	588.373	12.8	Leu Gln Lys Ser Leu	C26H49N7O8	46.8	2.3	RPLC-POS
HMDB0000286	1.56_567.0604m/z	567.06	1.6	Uridine diphosphate glucose	C15H24N2O17P2	46.8	-3.4	RPLC-POS
HMDB0010382	13.06_496.3394m/z	496.339	13.1	LysoPC(16:0)	C24H50NO7P	46.8	-0.7	RPLC-POS
HMDB0030944	11.96_151.1471m/z	151.147	12	Cystophorene	C11H18	46.8	-7.1	RPLC-POS
HMDB0033560	7.98_192.1011m/z	192.101	8	(E)-5-(3,4,5,6-Tetrahydro-3-pyridylidenemethyl)-2-furanmethanol	C11H13NO2	46.8	-4.2	RPLC-POS
HMDB0036098	8.20_165.0901m/z	165.09	8.2	Isoegomaketone	C10H12O2	46.8	-5.5	RPLC-POS
HMDB0038057	8.38_316.2835m/z	316.283	8.4	Dehydrophytosphingosine	C18H37NO3	46.8	-3.7	RPLC-POS
22355	6.02_404.1923m/z	404.192	6	His Thr Phe	C19H25N5O5	46.9	-1.4	RPLC-POS
40778	10.90_480.3062m/z	480.306	10.9	PE(18:1(9Z)/0:0)	C23H46NO7P	46.9	-4.7	RPLC-POS
HMDB0000175	3.79_349.0534m/z	349.053	3.8	Inosinic acid	C10H13N4O8P	46.9	-2.8	RPLC-POS
HMDB0000756	7.63_260.1853m/z	260.185	7.6	L-Hexanoylcarnitine	C13H25NO4	46.9	-1.4	RPLC-POS
HMDB0001067	4.97_305.0968m/z	305.097	5	N-Acetylaspartylglutamic acid	C11H16N2O8	46.9	-3.7	RPLC-POS
HMDB0008993	15.58_746.5663m/z	746.566	15.6	PE(18:0/18:1(9Z))	C41H80NO8P	46.9	-4.2	RPLC-POS
3720	16.80_328.3198m/z	328.32	16.8	Stearoylethanolamide	C20H41NO2	47	-3.6	RPLC-POS
22953	5.97_290.1694m/z	290.169	6	Ala Thr Val	C12H23N3O5	47	-5.6	RPLC-POS
23675	6.37_280.1282m/z	280.128	6.4	Asn Phe	C13H17N3O4	47	-3.5	RPLC-POS
HMDB0000277	11.61_380.2551m/z	380.255	11.6	Sphingosine 1-phosphate	C18H38NO5P	47	-2.5	RPLC-POS
HMDB0000651	9.74_316.2475m/z	316.248	9.7	Decanoylcarnitine	C17H33NO4	47	-2.2	RPLC-POS
HMDB0013250	13.87_286.2367m/z	286.237	13.9	Myristoylglycine	C16H31NO3	47	-3.5	RPLC-POS
HMDB0028912	5.90_260.1956m/z	260.196	5.9	Isoleucyl-Lysine	C12H25N3O3	47	-4.9	RPLC-POS
HMDB0031668	11.57_223.0955m/z	223.095	11.6	Dihydrodeoxy-8-epiaustdiol	C12H14O4	47	-4.5	RPLC-POS
HMDB0036047	13.15_253.1419m/z	253.142	13.1	3alpha-Hydroxyoreadone	C14H20O4	47	-6	RPLC-POS
16025	4.29_331.2323m/z	331.232	4.3	Leu Ala Lys	C15H30N4O4	47.1	-5	RPLC-POS
263619	10.61_133.1001m/z	133.1	10.6	3,4-Dimethylstyrene	C10H12	47.1	-8.4	RPLC-POS
HMDB0003764	2.17_219.0962m/z	219.096	2.2	Glutamylalanine	C8H14N2O5	47.1	-6.1	RPLC-POS
HMDB0028853	5.91_239.1013m/z	239.101	5.9	Glycyltyrosine	C11H14N2O4	47.1	-5.7	RPLC-POS
HMDB0029116	7.14_368.1592m/z	368.159	7.1	Tyrosyl-Tryptophan	C20H21N3O4	47.1	-3.4	RPLC-POS
HMDB0029130	6.50_231.1693m/z	231.169	6.5	Valyl-Isoleucine	C11H22N2O3	47.1	-4.3	RPLC-POS
HMDB0029159	2.14_249.1071m/z	249.107	2.1	gamma-Glutamylthreonine	C9H16N2O6	47.1	-4.3	RPLC-POS
HMDB0032049	12.20_183.0793m/z	183.079	12.2	Benzophenone	C13H10O	47.1	-6.4	RPLC-POS
HMDB0032628	4.52_136.0751m/z	136.075	4.5	2-Aminoacetophenone	C8H9NO	47.1	-4.2	RPLC-POS
HMDB0059653	5.80_464.0806m/z	464.081	5.8	N(6)-(1,2-dicarboxyethyl)AMP	C14H18N5O11P	47.1	-1.5	RPLC-POS
21027	2.07_333.1757m/z	333.176	2.1	Gly Lys Glu	C13H24N4O6	47.2	-3.5	RPLC-POS
HMDB0000159	6.08_166.0861m/z	166.086	6.1	L-Phenylalanine	C9H11NO2	47.2	-0.9	RPLC-POS
HMDB0011170	6.26_261.1434m/z	261.143	6.3	gamma-Glutamylisoleucine	C11H20N2O5	47.2	-4.1	RPLC-POS
HMDB0028757	6.26_247.1278m/z	247.128	6.3	Aspartyl-Leucine	C10H18N2O5	47.2	-4.1	RPLC-POS
HMDB0028901	2.67_288.2021m/z	288.202	2.7	Isoleucyl-Arginine	C12H25N5O3	47.2	-3.3	RPLC-POS
HMDB0035613	12.99_253.1788m/z	253.179	13	Epioxylubimin	C15H24O3	47.2	-3.9	RPLC-POS
HMDB0062177	6.74_254.1012m/z	254.101	6.7	N-lactoyl-Tyrosine	C12H15NO5	47.2	-4.3	RPLC-POS
HMDB0133182	12.41_251.1267m/z	251.127	12.4	2-hydroxy-3-[4-hydroxy-3-(3-methylbut-2-en-1-yl)phenyl]propanoic acid	C14H18O4	47.2	-4.4	RPLC-POS
17861	14.70_329.1905m/z	329.19	14.7	Pro Arg Gly	C13H24N6O4	47.3	-8.2	RPLC-POS
17928	5.86_385.2538m/z	385.254	5.9	Ile Pro Arg	C17H32N6O4	47.3	-5	RPLC-POS
43920	13.34_431.3133m/z	431.313	13.3	Hecogenin	C27H42O4	47.3	-5.3	RPLC-POS
44223	13.18_130.0849m/z	130.085	13.2	NIPECOTIC ACID	C6H11NO2	47.3	-10.8	RPLC-POS
HMDB0038154	12.61_269.1739m/z	269.174	12.6	3,11,12-Trihydroxy-1(10)-spirovetiven-2-one	C15H24O4	47.3	-3.2	RPLC-POS
24068	13.79_510.3562m/z	510.356	13.8	1-heptadecanoyl-sn-glycero-3-phosphocholine	C25H52NO7P	47.4	1.6	RPLC-POS
HMDB0002039	5.82_86.0592m/z	86.0592	5.8	2-Pyrrolidinone	C4H7NO	47.4	-10.4	RPLC-POS
HMDB0002177	16.77_305.2462m/z	305.246	16.8	Cis-8,11,14,17-Eicosatetraenoic acid	C20H32O2	47.4	-4.4	RPLC-POS
HMDB0010386	12.55_520.3388m/z	520.339	12.5	LysoPC(18:2(9Z,12Z))	C26H50NO7P	47.4	-1.8	RPLC-POS
HMDB0010396	12.56_544.3389m/z	544.339	12.6	LysoPC(20:4(8Z,11Z,14Z,17Z))	C28H50NO7P	47.4	-1.6	RPLC-POS
HMDB0011172	5.98_247.1281m/z	247.128	6	gamma-Glutamylvaline	C10H18N2O5	47.4	-3	RPLC-POS
HMDB0028782	6.60_269.0946m/z	269.095	6.6	Cysteinyl-Phenylalanine	C12H16N2O3S	47.4	-3.2	RPLC-POS
HMDB0028951	5.23_204.1330m/z	204.133	5.2	Lysyl-Glycine	C8H17N3O3	47.4	-6	RPLC-POS
HMDB0032523	4.01_101.0224m/z	101.022	4	Succinic anhydride	C4H4O3	47.4	-9.5	RPLC-POS
HMDB0128642	7.29_264.0532m/z	264.053	7.3	2-{[hydroxy(6-hydroxy-1-oxo-1H-isochromen-3-yl)methylidene]amino}acetic acid	C12H9NO6	47.4	11.3	RPLC-POS
HMDB0130027	3.08_295.0640m/z	295.064	3.1	6-(1-carboxy-2-methoxy-2-oxoethyl)-3,4,5-trihydroxyoxane-2-carboxylic acid	C10H14O10	47.4	-6.7	RPLC-POS
411	14.07_342.2987m/z	342.299	14.1	C-2 Ceramide	C20H39NO3	47.5	-4.6	RPLC-POS
17179	5.46_439.2292m/z	439.229	5.5	Tyr Thr Arg	C19H30N6O6	47.5	-1.8	RPLC-POS
20845	7.27_394.1956m/z	394.196	7.3	Ile Asp Phe	C19H27N3O6	47.5	-4.4	RPLC-POS
106862	6.76_446.2597m/z	446.26	6.8	Ala Lys Leu Asp	C19H35N5O7	47.5	-2.7	RPLC-POS
HMDB0000824	5.82_218.1384m/z	218.138	5.8	Propionylcarnitine	C10H19NO4	47.5	-1.2	RPLC-POS
HMDB0029830	10.95_367.1316m/z	367.132	11	N-Caffeoyltryptophan	C20H18N2O5	47.5	7.4	RPLC-POS
19994	1.53_334.1233m/z	334.123	1.5	Glu Glu Gly	C12H19N3O8	47.6	-3.6	RPLC-POS
265084	10.64_163.1124m/z	163.112	10.6	3-Methyl-1-phenyl-1-butanone	C11H14O	47.6	4.4	RPLC-POS
HMDB0001238	7.12_219.1117m/z	219.112	7.1	N-Acetylserotonin	C12H14N2O2	47.6	-5	RPLC-POS
HMDB0002117	16.11_282.2784m/z	282.278	16.1	Oleamide	C18H35NO	47.6	-2.8	RPLC-POS
HMDB0002815	13.43_522.3552m/z	522.355	13.4	LysoPC(18:1(9Z))	C26H52NO7P	47.6	-0.5	RPLC-POS
HMDB0028846	5.72_204.1337m/z	204.134	5.7	Glycyl-Lysine	C8H17N3O3	47.6	-2.8	RPLC-POS
HMDB0029072	6.73_306.1435m/z	306.143	6.7	Threoninyl-Tryptophan	C15H19N3O4	47.6	-4.5	RPLC-POS
HMDB0113923	14.90_726.5029m/z	726.503	14.9	PE-NMe2(15:0/18:4(6Z,9Z,12Z,15Z))	C40H72NO8P	47.6	-5.4	RPLC-POS
19617	6.80_334.1780m/z	334.178	6.8	Cys Leu Val	C14H27N3O4S	47.7	-4.6	RPLC-POS
20694	7.00_407.2643m/z	407.264	7	Lys Ile Phe	C21H34N4O4	47.7	-2.5	RPLC-POS
HMDB0000958	3.58_175.0226m/z	175.023	3.6	trans-Aconitic acid	C6H6O6	47.7	-6.6	RPLC-POS
HMDB0001066	5.80_380.1116m/z	380.112	5.8	S-Lactoylglutathione	C13H21N3O8S	47.7	-1.5	RPLC-POS
HMDB0001155	5.60_757.0850m/z	757.085	5.6	Diadenosine triphosphate	C20H27N10O16P3	47.7	-5.6	RPLC-POS
HMDB0013220	4.84_322.0763m/z	322.076	4.8	Beta-Citryl-L-glutamic acid	C11H15NO10	47.7	-1.8	RPLC-POS
HMDB0031641	1.62_72.0803m/z	72.0803	1.6	Pyrrolidine	C4H9N	47.7	-6.9	RPLC-POS
HMDB0034688	7.78_291.1048m/z	291.105	7.8	2,3-Dihydro-2,3-dihydroxy-9-phenyl-1H-phenalen-1-one	C19H14O3	47.7	11.1	RPLC-POS
HMDB0059946	14.11_259.1895m/z	259.19	14.1	2-Hydroxypropyl 2-isopropyl-5-methylcyclohexyl carbonate	C14H26O4	47.7	-3.4	RPLC-POS
3630	6.42_558.2140m/z	558.214	6.4	FucÎ±1-2GalÎ²1-4GlcÎ²-Sp	C20H35N3O15	47.8	-0.2	RPLC-POS
19584	5.93_318.2003m/z	318.2	5.9	Val Val Thr	C14H27N3O5	47.8	-6.4	RPLC-POS
264167	7.59_602.3368m/z	602.337	7.6	Glu Glu Val Leu Ile	C27H47N5O10	47.8	-4.6	RPLC-POS
HMDB0000939	5.52_385.1276m/z	385.128	5.5	S-Adenosylhomocysteine	C14H20N6O5S	47.8	-3.2	RPLC-POS
HMDB0004610	8.59_318.2991m/z	318.299	8.6	Phytosphingosine	C18H39NO3	47.8	-3.5	RPLC-POS
HMDB0006831	1.38_146.1164m/z	146.116	1.4	3-Dehydroxycarnitine	C7H15NO2	47.8	-8.3	RPLC-POS
HMDB0012286	6.84_190.0885m/z	190.088	6.8	S-Prenyl-L-cysteine	C8H15NO2S	47.8	-6.1	RPLC-POS
HMDB0029134	6.77_265.1534m/z	265.153	6.8	Valyl-Phenylalanine	C14H20N2O3	47.8	-4.8	RPLC-POS
HMDB0029739	5.82_175.0855m/z	175.085	5.8	1H-Indole-3-acetamide	C10H10N2O	47.8	-6.3	RPLC-POS
HMDB0030271	10.62_477.3644m/z	477.364	10.6	Dehydrocarpaine I	C28H48N2O4	47.8	-9	RPLC-POS
HMDB0041993	6.74_246.1699m/z	246.17	6.7	Pivaloylcarnitine	C12H23NO4	47.8	-0.4	RPLC-POS
43545	2.12_160.1321m/z	160.132	2.1	METHACHOLINE	C8H17NO2	47.9	-7.2	RPLC-POS
HMDB0000201	2.91_204.1223m/z	204.122	2.9	L-Acetylcarnitine	C9H17NO4	47.9	-3.7	RPLC-POS
HMDB0001488	2.76_124.0380m/z	124.038	2.8	Nicotinic acid	C6H5NO2	47.9	-10.9	RPLC-POS
HMDB0001901	4.57_132.1015m/z	132.101	4.6	Aminocaproic acid	C6H13NO2	47.9	-3.1	RPLC-POS
HMDB0002017	5.95_122.0952m/z	122.095	5.9	1-Phenylethylamine	C8H11N	47.9	-9.7	RPLC-POS
HMDB0005066	11.49_372.3112m/z	372.311	11.5	Tetradecanoylcarnitine	C21H41NO4	47.9	0.9	RPLC-POS
HMDB0010402	12.85_570.3549m/z	570.355	12.8	LysoPC(22:5(4Z,7Z,10Z,13Z,16Z))	C30H52NO7P	47.9	-0.9	RPLC-POS
HMDB0013804	12.14_191.1418m/z	191.142	12.1	beta-Damascenone	C13H18O	47.9	-6.3	RPLC-POS
HMDB0029068	6.44_267.1329m/z	267.133	6.4	Threoninyl-Phenylalanine	C13H18N2O4	47.9	-4	RPLC-POS
HMDB0000267	1.23_130.0493m/z	130.049	1.2	Pyroglutamic acid	C5H7NO3	48	-4.1	RPLC-POS
HMDB0001271	1.56_325.0424m/z	325.042	1.6	Pseudouridine 5'-phosphate	C9H13N2O9P	48	-2.3	RPLC-POS
HMDB0010387	13.06_518.3193m/z	518.319	13.1	LysoPC(18:3(6Z,9Z,12Z))	C26H48NO7P	48	-9.3	RPLC-POS
HMDB0011130	14.47_482.3235m/z	482.324	14.5	LysoPE(18:0/0:0)	C23H48NO7P	48	-1.2	RPLC-POS
HMDB0000034	2.12_136.0608m/z	136.061	2.1	Adenine	C5H5N5	48.1	-7	RPLC-POS
HMDB0006552	9.71_313.0708m/z	313.071	9.7	Aflatoxin B1	C17H12O6	48.1	0.3	RPLC-POS
HMDB0014340	5.74_268.1038m/z	268.104	5.7	Vidarabine	C10H13N5O4	48.1	-1	RPLC-POS
HMDB0028920	6.23_231.1692m/z	231.169	6.2	Isoleucyl-Valine	C11H22N2O3	48.1	-4.7	RPLC-POS
HMDB0125081	4.38_335.0773m/z	335.077	4.4	7-hydroxy-6-methoxy-3-(1,2,5-trihydroxy-4-oxocyclohex-2-en-1-yl)-4H-chromen-4-one	C16H14O8	48.1	3.6	RPLC-POS
43402	15.19_344.3142m/z	344.314	15.2	Dihydroceramide C2	C20H41NO3	48.2	-5.1	RPLC-POS
HMDB0000719	1.23_120.0643m/z	120.064	1.2	L-Homoserine	C4H9NO3	48.2	-9.9	RPLC-POS
HMDB0029388	11.96_213.1471m/z	213.147	12	Cucurbic acid	C12H20O3	48.2	-6.6	RPLC-POS
HMDB0036626	6.06_149.0588m/z	149.059	6.1	3,4-Dihydro-2H-1-benzopyran-2-one	C9H8O2	48.2	-6	RPLC-POS
HMDB0059660	1.23_216.0621m/z	216.062	1.2	sn-glycero-3-Phosphoethanolamine	C5H14NO6P	48.2	-4.8	RPLC-POS
286	6.46_118.0640m/z	118.064	6.5	Indole	C8H7N	48.3	-10	RPLC-POS
17837	5.83_422.1486m/z	422.149	5.8	His Cys Tyr	C18H23N5O5S	48.3	-1.5	RPLC-POS
HMDB0028808	6.67_333.1540m/z	333.154	6.7	Glutaminyltryptophan	C16H20N4O4	48.3	-5.1	RPLC-POS
HMDB0029106	6.67_295.1279m/z	295.128	6.7	Tyrosyl-Hydroxyproline	C14H18N2O5	48.3	-3.1	RPLC-POS
HMDB0034777	7.17_262.1271m/z	262.127	7.2	Epidermin	C11H19NO6	48.3	-5.3	RPLC-POS
HMDB0061717	1.53_262.1275m/z	262.127	1.5	Succinylcarnitine	C11H19NO6	48.3	-4	RPLC-POS
18202	6.53_338.1337m/z	338.134	6.5	Gly Asp Phe	C15H19N3O6	48.4	-2.8	RPLC-POS
HMDB0008900	14.80_732.5516m/z	732.552	14.8	PE(15:0/20:1(11Z))	C40H78NO8P	48.4	-2.9	RPLC-POS
HMDB0008908	15.33_760.5835m/z	760.583	15.3	PE(15:0/22:1(13Z))	C42H82NO8P	48.4	-2.1	RPLC-POS
HMDB0010395	13.43_544.3357m/z	544.336	13.4	LysoPC(20:4(5Z,8Z,11Z,14Z))	C28H50NO7P	48.4	-7.5	RPLC-POS
HMDB0039539	13.93_221.1521m/z	221.152	13.9	13-Tetradecene-1,3-diyne-6,7-diol	C14H20O2	48.4	-6.8	RPLC-POS
HMDB0041923	5.93_178.1216m/z	178.122	5.9	Mephedrone	C11H15NO	48.4	-5.8	RPLC-POS
HMDB0128542	8.29_507.1479m/z	507.148	8.3	3,4,5-trihydroxy-6-({5,6,14-trimethoxy-8,17-dioxatetracyclo[8.7.0.0Â²,â·.0Â¹Â¹,Â¹â¶]heptadeca-2,4,6,11(16),12,14-hexaen-4-yl}oxy)oxane-2-carboxylic acid	C24H26O12	48.4	-3.6	RPLC-POS
30	1.62_106.0488m/z	106.049	1.6	L-Serine	C3H7NO3	48.5	-10	RPLC-POS
23964	2.52_260.1960m/z	260.196	2.5	Ile Lys	C12H25N3O3	48.5	-3.5	RPLC-POS
HMDB0000821	7.58_194.0809m/z	194.081	7.6	Phenylacetylglycine	C10H11NO3	48.5	-1.2	RPLC-POS
HMDB0000912	6.05_384.1137m/z	384.114	6	Succinyladenosine	C14H17N5O8	48.5	-3.3	RPLC-POS
HMDB0001511	1.31_212.0419m/z	212.042	1.3	Phosphocreatine	C4H10N3O5P	48.5	-5.6	RPLC-POS
HMDB0003540	1.43_348.0691m/z	348.069	1.4	3'-AMP	C10H14N5O7P	48.5	-3.7	RPLC-POS
HMDB0003896	13.06_383.3299m/z	383.33	13.1	7-Dehydrodesmosterol	C27H42O	48.5	-2.5	RPLC-POS
HMDB0037841	3.62_312.1099m/z	312.11	3.6	N-(1-Deoxy-1-fructosyl)methionine	C11H21NO7S	48.5	-3.9	RPLC-POS
17496	5.98_317.1817m/z	317.182	6	Leu Asn Ala	C13H24N4O5	48.6	-0.7	RPLC-POS
18561	5.90_373.2793m/z	373.279	5.9	Ile Lys Ile	C18H36N4O4	48.6	-4.3	RPLC-POS
63632	5.66_130.0488m/z	130.049	5.7	(R)-(+)-2-Pyrrolidone-5-carboxylic acid	C5H7NO3	48.6	-8	RPLC-POS
HMDB0000403	5.78_152.0558m/z	152.056	5.8	2-Hydroxyadenine	C5H5N5O	48.6	-6	RPLC-POS
53	1.41_230.0949m/z	230.095	1.4	Ergothioneine	C9H15N3O2S	48.7	-3.7	RPLC-POS
23749	3.09_269.1597m/z	269.16	3.1	His Ile	C12H20N4O3	48.7	-4.2	RPLC-POS
23769	3.61_260.1957m/z	260.196	3.6	Lys Ile	C12H25N3O3	48.7	-4.4	RPLC-POS
HMDB0028817	1.40_276.1179m/z	276.118	1.4	Glutamylglutamine	C10H17N3O6	48.7	-3.9	RPLC-POS
HMDB0029000	4.50_294.1805m/z	294.18	4.5	Phenylalanyl-Lysine	C15H23N3O3	48.7	-2.5	RPLC-POS
HMDB0029418	1.43_238.0368m/z	238.037	1.4	S-Cysteinosuccinic acid	C7H11NO6S	48.7	-5.1	RPLC-POS
HMDB0062769	11.31_114.0901m/z	114.09	11.3	Epsilon-caprolactam	C6H11NO	48.7	-11.2	RPLC-POS
65469	7.17_210.0566m/z	210.057	7.2	(2R,4R)-2-phenylthiazolidine-4-carboxylic acid	C10H11NO2S	48.8	-8.4	RPLC-POS
264995	10.33_529.3707m/z	529.371	10.3	Leu Lys Ala Val Val	C25H48N6O6	48.8	-0.1	RPLC-POS
HMDB0000295	1.31_405.0079m/z	405.008	1.3	Uridine 5'-diphosphate	C9H14N2O12P2	48.8	-3.9	RPLC-POS
HMDB0000466	6.46_132.0794m/z	132.079	6.5	3-Methylindole	C9H9N	48.8	-10.2	RPLC-POS
HMDB0001256	1.08_203.2223m/z	203.222	1.1	Spermine	C10H26N4	48.8	-3.8	RPLC-POS
HMDB0003355	2.09_118.0856m/z	118.086	2.1	5-Aminopentanoic acid	C5H11NO2	48.8	-5.7	RPLC-POS
HMDB0011503	12.99_454.2923m/z	454.292	13	LysoPE(16:0/0:0)	C21H44NO7P	48.8	-1.2	RPLC-POS
HMDB0013112	1.35_608.0874m/z	608.087	1.4	UDP-N-acetyl-D-mannosamine	C17H27N3O17P2	48.8	-2.4	RPLC-POS
HMDB0013209	6.73_276.1328m/z	276.133	6.7	Alanyltryptophan	C14H17N3O3	48.8	-5.2	RPLC-POS
HMDB0015109	1.41_293.0979m/z	293.098	1.4	Edetic Acid	C10H16N2O8	48.8	0	RPLC-POS
HMDB0028921	5.66_260.1593m/z	260.159	5.7	Isoleucyl-Gamma-glutamate	C11H21N3O4	48.8	-4.5	RPLC-POS
HMDB0029051	5.88_269.1122m/z	269.112	5.9	Seryltyrosine	C12H16N2O5	48.8	-3.6	RPLC-POS
HMDB0041370	10.85_351.1329m/z	351.133	10.9	Na-p-Hydroxycoumaroyltryptophan	C20H18N2O4	48.8	-3	RPLC-POS
16884	13.76_419.2384m/z	419.238	13.8	Pro Phe Arg	C20H30N6O4	48.9	-4.2	RPLC-POS
HMDB0000062	1.29_162.1119m/z	162.112	1.3	L-Carnitine	C7H15NO3	48.9	-3.3	RPLC-POS
HMDB0006248	3.46_219.0973m/z	219.097	3.5	gamma-Glutamylalanine	C8H14N2O5	48.9	-1	RPLC-POS
HMDB0028852	6.70_262.1176m/z	262.118	6.7	Glycyl-Tryptophan	C13H15N3O3	48.9	-3.8	RPLC-POS
HMDB0028910	6.65_245.1851m/z	245.185	6.7	Isoleucyl-Isoleucine	C12H24N2O3	48.9	-3.5	RPLC-POS
46771	9.32_480.2761m/z	480.276	9.3	Cytochalasin B	C29H37NO5	49	3.5	RPLC-POS
HMDB0001520	6.57_457.1105m/z	457.111	6.6	Flavin Mononucleotide	C17H21N4O9P	49	-3	RPLC-POS
HMDB0011506	13.37_480.3078m/z	480.308	13.4	LysoPE(18:1(9Z)/0:0)	C23H46NO7P	49	-1.4	RPLC-POS
HMDB0029449	2.40_148.0953m/z	148.095	2.4	(2R,3R,4R)-2-Amino-4-hydroxy-3-methylpentanoic acid	C6H13NO3	49	-10	RPLC-POS
HMDB0034438	9.64_287.0909m/z	287.091	9.6	(R)-Pabulenol	C16H14O5	49	-1.7	RPLC-POS
HMDB0059837	15.33_119.0845m/z	119.085	15.3	Indane	C9H10	49	-8.6	RPLC-POS
18797	6.23_361.2053m/z	361.205	6.2	Gln Thr Ile	C15H28N4O6	49.1	-8	RPLC-POS
163367	5.54_529.3796m/z	529.38	5.5	Ile Leu Arg Lys	C24H48N8O5	49.1	-4.7	RPLC-POS
HMDB0000734	6.46_188.0710m/z	188.071	6.5	Indoleacrylic acid	C11H9NO2	49.1	2	RPLC-POS
HMDB0001397	2.29_364.0642m/z	364.064	2.3	Guanosine monophosphate	C10H14N5O8P	49.1	-2.9	RPLC-POS
HMDB0034107	10.64_135.0793m/z	135.079	10.6	Chavicol	C9H10O	49.1	-8.8	RPLC-POS
HMDB0039733	1.44_338.1001m/z	338.1	1.4	gamma-Glutamylcysteinylserine	C11H19N3O7S	49.1	-4.7	RPLC-POS
3982	10.70_192.1372m/z	192.137	10.7	diethyltoluamide	C12H17NO	49.2	-5.6	RPLC-POS
15931	7.06_391.1952m/z	391.195	7.1	Val Ser Trp	C19H26N4O5	49.2	-6.1	RPLC-POS
19155	5.72_317.2170m/z	317.217	5.7	Ile Gly Lys	C14H28N4O4	49.2	-4.1	RPLC-POS
23991	4.72_233.1120m/z	233.112	4.7	Asp Val	C9H16N2O5	49.2	-5.2	RPLC-POS
HMDB0000631	10.92_450.3205m/z	450.32	10.9	Deoxycholic acid glycine conjugate	C26H43NO5	49.2	-2	RPLC-POS
HMDB0012114	1.07_147.1117m/z	147.112	1.1	(3S)-3,6-Diaminohexanoate	C6H14N2O2	49.2	-7.4	RPLC-POS
16182	6.25_290.1698m/z	290.17	6.2	Gly Thr Leu	C12H23N3O5	49.3	-4.2	RPLC-POS
17155	7.20_360.2113m/z	360.211	7.2	Asp Ile Leu	C16H29N3O6	49.3	-4.4	RPLC-POS
HMDB0037844	2.12_280.1372m/z	280.137	2.1	N-(1-Deoxy-1-fructosyl)valine	C11H21NO7	49.3	-6.6	RPLC-POS
17472	5.95_361.2053m/z	361.205	5.9	Gln Ile Thr	C15H28N4O6	49.4	-7.9	RPLC-POS
17169	5.91_451.2627m/z	451.263	5.9	Arg Leu Tyr	C21H34N6O5	49.5	-8.1	RPLC-POS
HMDB0011745	6.74_192.0679m/z	192.068	6.7	N-Acetyl-L-methionine	C7H13NO3S	49.5	-5.2	RPLC-POS
HMDB0030365	15.30_419.2811m/z	419.281	15.3	Cavipetin D	C25H38O5	49.5	4.6	RPLC-POS
15730	7.20_374.2269m/z	374.227	7.2	Glu Ile Leu	C17H31N3O6	49.6	-4.5	RPLC-POS
23844	6.21_203.1377m/z	203.138	6.2	Ala Ile	C9H18N2O3	49.6	-6.3	RPLC-POS
HMDB0000641	1.23_147.0756m/z	147.076	1.2	L-Glutamine	C5H10N2O3	49.6	-5.5	RPLC-POS
HMDB0029440	5.83_162.0573m/z	162.057	5.8	trans-S-(1-Propenyl)-L-cysteine	C6H11NO2S	49.6	-6.1	RPLC-POS
HMDB0032990	11.57_177.0536m/z	177.054	11.6	7-Hydroxy-6-methyl-2H-1-benzopyran-2-one	C10H8O3	49.6	-5.7	RPLC-POS
HMDB0061177	2.96_273.0834m/z	273.083	3	Pyridine N-oxide glucuronide	C11H14NO7+	49.6	-3.2	RPLC-POS
21550	6.23_389.2384m/z	389.238	6.2	Glu Leu Lys	C17H32N4O6	49.7	-2.6	RPLC-POS
HMDB0001406	3.35_123.0545m/z	123.054	3.4	Niacinamide	C6H6N2O	49.7	-6.8	RPLC-POS
HMDB0003416	1.22_175.1182m/z	175.118	1.2	D-Arginine	C6H14N4O2	49.7	-4.1	RPLC-POS
HMDB0114763	6.26_355.1869m/z	355.187	6.3	LysoPA(i-12:0/0:0)	C15H31O7P	49.7	-3.3	RPLC-POS
HMDB0000786	4.69_153.0400m/z	153.04	4.7	Oxypurinol	C5H4N4O2	49.8	-4.8	RPLC-POS
HMDB0011737	1.53_277.1026m/z	277.103	1.5	gamma-Glutamylglutamic acid	C10H16N2O7	49.8	-1.7	RPLC-POS
HMDB0032055	5.75_198.0868m/z	198.087	5.8	N-Acetylhistidine	C8H11N3O3	49.8	-2.5	RPLC-POS
HMDB0033935	11.00_273.0907m/z	273.091	11	Anigorufone	C19H12O2	49.8	-1.3	RPLC-POS
HMDB0240225	12.52_427.2461m/z	427.246	12.5	Oxatomide	C27H30N4O	49.8	-7.5	RPLC-POS
3894	16.40_403.3552m/z	403.355	16.4	5,6Î± epoxy-cholesterol	C27H46O2	49.9	-4.5	RPLC-POS
16735	8.67_379.1614m/z	379.161	8.7	Lys Cys Glu	C14H26N4O6S	49.9	-8.5	RPLC-POS
20774	5.49_520.2167m/z	520.217	5.5	Trp Trp Glu	C27H29N5O6	49.9	-4.6	RPLC-POS
23967	4.41_260.1956m/z	260.196	4.4	Lys Leu	C12H25N3O3	49.9	-4.7	RPLC-POS
HMDB0001138	4.49_190.0698m/z	190.07	4.5	N-Acetylglutamic acid	C7H11NO5	49.9	-6.2	RPLC-POS
HMDB0002250	10.62_344.2790m/z	344.279	10.6	Dodecanoylcarnitine	C19H37NO4	49.9	-1.4	RPLC-POS
HMDB0003337	5.66_613.1587m/z	613.159	5.7	Oxidized glutathione	C20H32N6O12S2	49.9	-0.8	RPLC-POS
HMDB0034168	6.06_93.0689m/z	93.0689	6.1	Toluene	C7H8	49.9	-10.3	RPLC-POS
62290	11.85_452.2752m/z	452.275	11.8	LysoPE(16:1(9Z)/0:0)	C21H42NO7P	50	-4.3	RPLC-POS
HMDB0000086	1.25_258.1099m/z	258.11	1.2	Glycerophosphocholine	C8H20NO6P	50	-0.6	RPLC-POS
HMDB0001413	1.47_489.1132m/z	489.113	1.5	Citicoline	C14H26N4O11P2	50	-2.9	RPLC-POS
HMDB0001487	5.69_666.1305m/z	666.13	5.7	NADH	C21H29N7O14P2	50	-2.4	RPLC-POS
HMDB0028917	5.25_233.1483m/z	233.148	5.3	Isoleucyl-Threonine	C10H20N2O4	50	-5.5	RPLC-POS
23916	5.88_280.1284m/z	280.128	5.9	Phe Asn	C13H17N3O4	50.1	-3	RPLC-POS
65113	6.36_313.1031m/z	313.103	6.4	Abu-Thr-OH	C13H16N2O7	50.1	0.3	RPLC-POS
HMDB0000812	2.45_176.0546m/z	176.055	2.4	N-Acetyl-L-aspartic acid	C6H9NO5	50.1	-4.1	RPLC-POS
HMDB0028761	3.34_231.0963m/z	231.096	3.3	Aspartyl-Proline	C9H14N2O5	50.1	-5.6	RPLC-POS
HMDB0029898	1.29_343.1225m/z	343.122	1.3	Inulobiose	C12H22O11	50.1	-3	RPLC-POS
HMDB0062624	6.03_380.1114m/z	380.111	6	(R)-S-lactoylglutathionate(1-)	C13H21N3O8S	50.1	-2.3	RPLC-POS
44437	11.75_373.1264m/z	373.126	11.8	Tangeritin	C20H20O7	50.2	-4.7	RPLC-POS
HMDB0000148	1.28_148.0599m/z	148.06	1.3	L-Glutamic acid	C5H9NO4	50.2	-3.6	RPLC-POS
23514	4.05_388.2536m/z	388.254	4.1	Gln Leu Lys	C17H33N5O5	50.3	-4.7	RPLC-POS
34478	5.61_348.0690m/z	348.069	5.6	Adenosine monophosphate	C10H14N5O7P	50.3	-3.9	RPLC-POS
HMDB0011518	12.52_502.2919m/z	502.292	12.5	LysoPE(20:4(8Z,11Z,14Z,17Z)/0:0)	C25H44NO7P	50.3	-1.8	RPLC-POS
HMDB0029050	6.65_292.1282m/z	292.128	6.7	Seryltryptophan	C14H17N3O4	50.3	-3.5	RPLC-POS
57758	14.77_417.3345m/z	417.334	14.8	(25S)-5beta-spirostan-3beta-ol	C27H44O3	50.4	-4.4	RPLC-POS
96392	6.46_146.0594m/z	146.059	6.5	4-formyl Indole	C9H7NO	50.4	-4.4	RPLC-POS
HMDB0011488	12.34_502.2915m/z	502.292	12.3	LysoPE(0:0/20:4(8Z,11Z,14Z,17Z))	C25H44NO7P	50.4	-2.6	RPLC-POS
956	1.46_204.1225m/z	204.122	1.5	Acetylcarnitine	C9H17NO4	50.5	-2.8	RPLC-POS
22950	7.63_415.2322m/z	415.232	7.6	Ile Pro Trp	C22H30N4O4	50.5	-4.4	RPLC-POS
HMDB0010384	14.58_524.3700m/z	524.37	14.6	LysoPC(18:0)	C26H54NO7P	50.5	-2.1	RPLC-POS
62966	11.69_314.3039m/z	314.304	11.7	R-Palmitoyl-(2-methyl) Ethanolamide	C19H39NO2	50.6	-4.5	RPLC-POS
HMDB0001218	5.05_147.0432m/z	147.043	5	Coumarin	C9H6O2	50.6	-5.9	RPLC-POS
HMDB0010379	11.74_468.3079m/z	468.308	11.7	LysoPC(14:0/0:0)	C22H46NO7P	50.6	-1.2	RPLC-POS
HMDB0015090	7.03_476.3052m/z	476.305	7	Netilmicin	C21H41N5O7	50.6	-5.6	RPLC-POS
HMDB0000472	3.95_221.0912m/z	221.091	3.9	5-Hydroxy-L-tryptophan	C11H12N2O3	50.7	-4.1	RPLC-POS
HMDB0028818	1.43_277.1022m/z	277.102	1.4	Glutamylglutamic acid	C10H16N2O7	50.7	-3	RPLC-POS
HMDB0031682	2.23_104.0518m/z	104.052	2.2	(Â±)-2-Methylthiazolidine	C4H9NS	50.7	-10.6	RPLC-POS
HMDB0011171	6.50_261.1437m/z	261.144	6.5	gamma-Glutamylleucine	C11H20N2O5	50.8	-3	RPLC-POS
HMDB0015186	9.50_335.1057m/z	335.106	9.5	Penicillin G	C16H18N2O4S	50.8	-1	RPLC-POS
HMDB0028742	6.67_319.1391m/z	319.139	6.7	Asparaginyl-Tryptophan	C15H18N4O4	50.8	-3.1	RPLC-POS
HMDB0029223	7.29_180.1017m/z	180.102	7.3	alpha-Methylphenylalanine	C10H13NO2	50.8	-1.2	RPLC-POS
17842	6.67_332.2165m/z	332.217	6.7	Thr Ile Val	C15H29N3O5	50.9	-4.5	RPLC-POS
18488	6.26_404.2125m/z	404.213	6.3	Glu Gln Lys	C16H29N5O7	50.9	-3.6	RPLC-POS
23099	6.28_348.1760m/z	348.176	6.3	Asp Thr Leu	C14H25N3O7	51	-1.5	RPLC-POS
HMDB0034294	11.05_167.0852m/z	167.085	11.1	1,3,11-Tridecatriene-5,7,9-triyne	C13H10	51	-1.8	RPLC-POS
HMDB0037846	6.05_328.1381m/z	328.138	6	N-(1-Deoxy-1-fructosyl)phenylalanine	C15H21NO7	51	-2.9	RPLC-POS
18650	6.97_373.2429m/z	373.243	7	Gln Ile Ile	C17H32N4O5	51.1	-4.3	RPLC-POS
23852	4.09_269.1596m/z	269.16	4.1	His Leu	C12H20N4O3	51.1	-4.5	RPLC-POS
58012	2.46_166.0711m/z	166.071	2.5	7-Methylguanine	C6H7N5O	51.1	-7.2	RPLC-POS
HMDB0001341	1.87_428.0356m/z	428.036	1.9	ADP	C10H15N5O10P2	51.1	-2.5	RPLC-POS
HMDB0003254	1.37_252.1066m/z	252.107	1.4	Muramic acid	C9H17NO7	51.1	-4.8	RPLC-POS
43210	15.28_300.2885m/z	300.288	15.3	Palmitoyl Ethanolamide	C18H37NO2	51.2	-4.1	RPLC-POS
HMDB0006029	2.74_189.0858m/z	189.086	2.7	N-Acetylglutamine	C7H12N2O4	51.3	-6.5	RPLC-POS
HMDB0028954	6.76_260.1958m/z	260.196	6.8	Lysyl-Isoleucine	C12H25N3O3	51.3	-4.2	RPLC-POS
HMDB0060617	8.04_353.1164m/z	353.116	8	Penicilloic acid	C16H20N2O5S	51.3	-0.6	RPLC-POS
20914	6.77_388.2526m/z	388.253	6.8	Lys Leu Gln	C17H33N5O5	51.4	-7.3	RPLC-POS
43208	10.75_298.2732m/z	298.273	10.8	3-ketosphingosine	C18H35NO2	51.4	-2.8	RPLC-POS
HMDB0000239	4.32_170.0807m/z	170.081	4.3	Pyridoxine	C8H11NO3	51.4	-2.6	RPLC-POS
HMDB0000299	5.86_285.0828m/z	285.083	5.9	Xanthosine	C10H12N4O6	51.4	-0.7	RPLC-POS
HMDB0012492	6.34_367.1488m/z	367.149	6.3	1-(1,2,3,4,5-Pentahydroxypent-1-yl)-1,2,3,4-tetrahydro-beta-carboline-3-carboxylate	C17H22N2O7	51.4	-3.1	RPLC-POS
HMDB0006722	14.82_401.3409m/z	401.341	14.8	25-Hydroxytachysterol3	C27H44O2	51.5	-1.4	RPLC-POS
HMDB0013642	5.60_240.1078m/z	240.108	5.6	1-hydroxy-2-Oxopropyl tetrahydropterin	C9H13N5O3	51.5	-5.5	RPLC-POS
HMDB0040551	6.60_197.1274m/z	197.127	6.6	L-alpha-Amino-1H-pyrrole-1-hexanoic acid	C10H16N2O2	51.5	-5.5	RPLC-POS
HMDB0000195	5.78_269.0877m/z	269.088	5.8	Inosine	C10H12N4O5	51.6	-1.3	RPLC-POS
HMDB0029086	7.61_318.1803m/z	318.18	7.6	Tryptophyl-Isoleucine	C17H23N3O3	51.6	-2.8	RPLC-POS
HMDB0029817	12.52_167.0698m/z	167.07	12.5	Ethyl salicylate	C9H10O3	51.7	-2.9	RPLC-POS
HMDB0011489	18.87_500.2751m/z	500.275	18.9	LysoPE(0:0/20:5(5Z,8Z,11Z,14Z,17Z))	C25H42NO7P	51.8	-4.1	RPLC-POS
HMDB0029030	5.93_215.1376m/z	215.138	5.9	Prolyl-Valine	C10H18N2O3	51.8	-6.5	RPLC-POS
56	1.23_104.1064m/z	104.106	1.2	Choline	C5H13NO	51.9	-5.9	RPLC-POS
274	1.28_137.0701m/z	137.07	1.3	Trigonellinamide	C7H8N2O	51.9	-6	RPLC-POS
3582	5.60_492.0062m/z	492.006	5.6	dATP	C10H16N5O12P3	51.9	-3.9	RPLC-POS
HMDB0002334	13.13_167.0326m/z	167.033	13.1	Benzoquinoneacetic acid	C8H6O4	51.9	-7.9	RPLC-POS
2975	7.02_192.0645m/z	192.064	7	5-Hydroxyindoleacetic acid	C10H9NO3	52	-5.5	RPLC-POS
23807	5.85_189.1220m/z	189.122	5.8	Ile Gly	C8H16N2O3	52	-7.5	RPLC-POS
HMDB0000296	5.30_245.0757m/z	245.076	5.3	Uridine	C9H12N2O6	52	-4.4	RPLC-POS
16160	6.95_328.2219m/z	328.222	7	Pro Val Ile	C16H29N3O4	52.2	-3.7	RPLC-POS
65477	6.95_245.1851m/z	245.185	7	NH-DVal(NMe)-Val-OMe	C12H24N2O3	52.2	-3.4	RPLC-POS
HMDB0004812	3.58_157.0120m/z	157.012	3.6	2,5-Furandicarboxylic acid	C6H4O5	52.2	-7.4	RPLC-POS
HMDB0141768	4.52_165.0543m/z	165.054	4.5	3-(4-hydroxyphenyl)oxirane-2-carbaldehyde	C9H8O3	52.2	-1.8	RPLC-POS
21575	6.46_363.1682m/z	363.168	6.5	Gln Cys Leu	C14H26N4O5S	52.3	-4	RPLC-POS
HMDB0000121	6.36_442.1462m/z	442.146	6.4	Folic acid	C19H19N7O6	52.3	-1.6	RPLC-POS
HMDB0011494	18.87_528.3064m/z	528.306	18.9	LysoPE(0:0/22:5(4Z,7Z,10Z,13Z,16Z))	C27H46NO7P	52.3	-4	RPLC-POS
20259	5.75_342.1400m/z	342.14	5.8	Gly Glu His	C13H19N5O6	52.4	-2.3	RPLC-POS
HMDB0031658	1.25_134.0801m/z	134.08	1.2	L-2-Amino-5-hydroxypentanoic acid	C5H11NO3	52.4	-8	RPLC-POS
23805	6.53_281.1121m/z	281.112	6.5	Asp Phe	C13H16N2O5	52.5	-3.9	RPLC-POS
HMDB0000715	6.62_190.0485m/z	190.048	6.6	Kynurenic acid	C10H7NO3	52.5	-7.3	RPLC-POS
23986	2.27_288.2023m/z	288.202	2.3	Ile Arg	C12H25N5O3	52.7	-2.6	RPLC-POS
19613	5.77_390.1766m/z	390.177	5.8	Ala His Tyr	C18H23N5O5	52.8	-1.5	RPLC-POS
22171	8.20_488.2277m/z	488.228	8.2	Trp Pro Trp	C27H29N5O4	52.8	-3.1	RPLC-POS
23859	6.06_246.1438m/z	246.144	6.1	Asn Ile	C10H19N3O4	52.8	-4.4	RPLC-POS
34542	9.32_516.2981m/z	516.298	9.3	Taurocholic acid	C26H45NO7S	52.8	-1.7	RPLC-POS
HMDB0000538	1.40_508.0016m/z	508.002	1.4	Adenosine triphosphate	C10H16N5O13P3	52.8	-2.8	RPLC-POS
HMDB0000884	3.37_259.0916m/z	259.092	3.4	Ribothymidine	C10H14N2O6	52.8	-3.2	RPLC-POS
HMDB0094649	6.25_146.1165m/z	146.117	6.2	2-Aminoheptanoate	C7H15NO2	52.8	-7.2	RPLC-POS
HMDB0000308	12.61_375.2881m/z	375.288	12.6	3b-Hydroxy-5-cholenoic acid	C24H38O3	52.9	-3.4	RPLC-POS
HMDB0040730	12.52_195.1009m/z	195.101	12.5	Butyl salicylate	C11H14O3	52.9	-3.2	RPLC-POS
263643	18.74_391.2828m/z	391.283	18.7	Bis(2-ethylhexyl) phthalate	C24H38O4	53	-3.8	RPLC-POS
HMDB0004813	2.61_259.0915m/z	259.091	2.6	3-Methyluridine	C10H14N2O6	53	-3.8	RPLC-POS
HMDB0036458	1.26_102.0541m/z	102.054	1.3	1-Aminocyclopropanecarboxylic acid	C4H7NO2	53	-8.5	RPLC-POS
44436	11.19_403.1372m/z	403.137	11.2	Nobiletin	C21H22O8	53.1	-3.8	RPLC-POS
HMDB0000133	5.78_284.0983m/z	284.098	5.8	Guanosine	C10H13N5O5	53.1	-2.2	RPLC-POS
HMDB0001163	2.03_606.0831m/z	606.083	2	Guanosine diphosphate mannose	C16H25N5O16P2	53.1	-2.2	RPLC-POS
3379	2.13_251.0685m/z	251.068	2.1	Î³-Glu-Cys	C8H14N2O5S	53.2	-4.6	RPLC-POS
3452	1.78_324.0579m/z	324.058	1.8	5'-CMP	C9H14N3O8P	53.2	-3.7	RPLC-POS
44663	5.03_136.0751m/z	136.075	5	PHENACYLAMINE	C8H9NO	53.2	-4.5	RPLC-POS
HMDB0000125	2.13_308.0912m/z	308.091	2.1	Glutathione	C10H17N3O6S	53.2	0.4	RPLC-POS
HMDB0000158	5.03_182.0808m/z	182.081	5	L-Tyrosine	C9H11NO3	53.2	-1.8	RPLC-POS
HMDB0037843	1.40_282.1173m/z	282.117	1.4	N-(1-Deoxy-1-fructosyl)threonine	C10H19NO8	53.2	-3.9	RPLC-POS
229	1.32_265.1107m/z	265.111	1.3	Thiamine	C12H16N4OS	53.3	-3.9	RPLC-POS
43385	1.43_444.0300m/z	444.03	1.4	Guanosine 5â€²-diphosphate (GDP)	C10H15N5O11P2	53.3	-3.7	RPLC-POS
63097	2.85_134.0433m/z	134.043	2.8	D-Aspartic acid	C4H7NO4	53.3	-11.4	RPLC-POS
65534	6.46_205.0967m/z	205.097	6.5	DL-Tryptophan	C11H12N2O2	53.3	-2.3	RPLC-POS
287	1.28_118.0855m/z	118.086	1.3	Betaine	C5H11NO2	53.4	-6.3	RPLC-POS
HMDB0034267	1.22_156.0756m/z	156.076	1.2	L-2-Amino-3-(1-pyrazolyl)propanoic acid	C6H9N3O2	53.5	-7.7	RPLC-POS
HMDB0039421	1.43_664.1160m/z	664.116	1.4	Fenugreekine	C21H27N7O14P2	53.5	-0.6	RPLC-POS
HMDB0061715	1.46_162.0750m/z	162.075	1.5	Glutamate, gamma-methyl ester	C6H11NO4	53.5	-6.5	RPLC-POS
23536	7.02_418.2069m/z	418.207	7	Val Asn Trp	C20H27N5O5	53.6	-3.7	RPLC-POS
HMDB0040012	7.82_188.1089m/z	188.109	7.8	2,3-Dihydro-5-(5-methyl-2-furanyl)-1H-pyrrolizine	C12H13NO	53.6	10.1	RPLC-POS
22182	6.70_360.2114m/z	360.211	6.7	Glu Val Ile	C16H29N3O6	53.7	-4.1	RPLC-POS
44314	3.79_424.1012m/z	424.101	3.8	S-(1,2-DICARBOXYETHYL)GLUTATHIONE	C14H21N3O10S	53.7	-2	RPLC-POS
44688	10.59_500.3019m/z	500.302	10.6	5Î²-CHOLANIC ACID-3Î±, 12Î±-DIOL N-(2-SULPHOETHYL)-AMIDE	C26H45NO6S	53.7	-4.3	RPLC-POS
71442	15.33_135.0794m/z	135.079	15.3	Chavicol	C9H10O	53.7	-7.4	RPLC-POS
233	6.84_377.1447m/z	377.145	6.8	Riboflavin (Vitamin B2)	C17H20N4O6	53.8	-2.3	RPLC-POS
23895	6.36_253.1178m/z	253.118	6.4	Ser Phe	C12H16N2O4	53.8	-1.9	RPLC-POS
HMDB0000446	3.40_189.1228m/z	189.123	3.4	N-Alpha-acetyllysine	C8H16N2O3	53.9	-2.8	RPLC-POS
23669	2.12_260.1962m/z	260.196	2.1	Leu Lys	C12H25N3O3	54	-2.7	RPLC-POS
44894	11.89_288.1985m/z	288.199	11.9	CAY10444	C15H29NO2S	54	-2.2	RPLC-POS
HMDB0037840	5.77_294.1537m/z	294.154	5.8	N-(1-Deoxy-1-fructosyl)leucine	C12H23NO7	54	-3.4	RPLC-POS
HMDB0000210	6.17_220.1183m/z	220.118	6.2	Pantothenic acid	C9H17NO5	54.1	1.5	RPLC-POS
44313	14.42_436.3531m/z	436.353	14.4	OCTADECYLPHOSPHOCHOLINE	C23H50NO4P	54.2	-4.3	RPLC-POS
HMDB0011753	2.45_134.0440m/z	134.044	2.4	Iminodiacetic acid	C4H7NO4	54.2	-5.6	RPLC-POS
HMDB0000157	1.43_137.0446m/z	137.045	1.4	Hypoxanthine	C5H4N4O	54.3	-8.8	RPLC-POS
HMDB0015545	7.82_385.0545m/z	385.054	7.8	Ticarcillin	C15H16N2O6S2	54.3	5.8	RPLC-POS
3581	1.32_489.1138m/z	489.114	1.3	Cytidine diphosphate choline (CDPcholine)	C14H26N4O11P2	54.5	-1.7	RPLC-POS
HMDB0033529	2.12_84.0800m/z	84.08	2.1	(+)-2,3-Dihydro-3-methyl-1H-pyrrole	C5H9N	54.5	-9.2	RPLC-POS
63401	18.92_348.0690m/z	348.069	18.9	Adenosine 3'-monophosphate	C10H14N5O7P	54.6	-4	RPLC-POS
23866	6.17_260.1594m/z	260.159	6.2	Gln Ile	C11H21N3O4	54.7	-4.3	RPLC-POS
64926	15.37_338.3407m/z	338.341	15.4	13Z-Docosenamide	C22H43NO	54.7	-3	RPLC-POS
41557	10.80_286.2733m/z	286.273	10.8	D-erythro-Sphingosine C-17	C17H35NO2	54.8	-2.8	RPLC-POS
15963	7.51_336.1907m/z	336.191	7.5	Gly Phe Ile	C17H25N3O4	54.9	-3.4	RPLC-POS
HMDB0002007	12.61_357.2782m/z	357.278	12.6	Tetracosahexaenoic acid	C24H36O2	54.9	-1.7	RPLC-POS
8	1.32_114.0652m/z	114.065	1.3	Creatinine	C4H7N3O	55	-8.7	RPLC-POS
101	5.34_664.1155m/z	664.116	5.3	Nicotinamide adenine dinucleotide (NAD)	C21H27N7O14P2	55	-1.3	RPLC-POS
17167	6.58_359.2278m/z	359.228	6.6	Ile Gln Val	C16H30N4O5	55.1	-3.2	RPLC-POS
306	5.03_165.0543m/z	165.054	5	2-Hydroxycinnamic acid	C9H8O3	55.3	-1.7	RPLC-POS
23657	6.14_189.1223m/z	189.122	6.1	Gly Leu	C8H16N2O3	55.4	-5.9	RPLC-POS
66352	5.03_123.0438m/z	123.044	5	Salicylaldehyde	C7H6O2	55.4	-1.9	RPLC-POS
64742	8.29_243.0870m/z	243.087	8.3	Lumichrome	C12H10N4O2	55.5	-2.7	RPLC-POS
HMDB0033716	11.94_135.0791m/z	135.079	11.9	3-Phenylpropanal	C9H10O	55.6	-9.9	RPLC-POS
17467	7.20_342.2376m/z	342.238	7.2	Ile Pro Ile	C17H31N3O4	55.7	-3.3	RPLC-POS
24101	1.32_310.1138m/z	310.114	1.3	N-Acetylneuraminic Acid	C11H19NO9	55.7	1.7	RPLC-POS
392	11.32_300.2889m/z	300.289	11.3	Sphingosine	C18H37NO2	55.8	-2.8	RPLC-POS
16487	6.67_392.2175m/z	392.218	6.7	Ile Pro Tyr	C20H29N3O5	55.9	-1.2	RPLC-POS
16989	6.73_318.2014m/z	318.201	6.7	Val Ser Ile	C14H27N3O5	56.1	-3.1	RPLC-POS
HMDB0001178	5.27_560.0767m/z	560.077	5.3	Adenosine diphosphate ribose	C15H23N5O14P2	56.1	-4	RPLC-POS
HMDB0013302	7.47_313.1539m/z	313.154	7.5	Phenylalanylphenylalanine	C18H20N2O3	56.1	-2.5	RPLC-POS
26	2.23_150.0575m/z	150.058	2.2	L-Methionine	C5H11NO2S	56.3	-5.5	RPLC-POS
102	1.43_744.0808m/z	744.081	1.4	Nicotinamide Adenine Dinucleotide Phosphate (NADP+)	C21H28N7O17P3	56.3	-2.6	RPLC-POS
3318	1.22_184.0728m/z	184.073	1.2	Phosphocholine	C5H14NO4P	56.4	-2.8	RPLC-POS
43207	3.29_168.0651m/z	168.065	3.3	2-Amino-3-methoxy-benzoic acid	C8H9NO3	56.5	-2.3	RPLC-POS
HMDB0032478	6.85_135.1011m/z	135.101	6.9	Polypropylene glycol (m w 1,200-3,000)	C6H14O3	57	-3.4	RPLC-POS
3425	6.29_298.0962m/z	298.096	6.3	5â€²-Deoxy-5â€²-<WBR>(methylthio)adenosine	C11H15N5O3S	57.4	-2.1	RPLC-POS
44613	4.34_152.0700m/z	152.07	4.3	N-METHYLANTHRANILIC ACID	C8H9NO2	57.4	-4	RPLC-POS
17185	6.60_288.1912m/z	288.191	6.6	Gly Ile Val	C13H25N3O4	57.7	-2.1	RPLC-POS
18955	7.22_332.2166m/z	332.217	7.2	Ser Leu Ile	C15H29N3O5	57.7	-4.2	RPLC-POS
3289	1.37_399.1433m/z	399.143	1.4	S-Adenosylmethionine	C15H22N6O5S	58	-3.1	RPLC-POS
19666	6.82_346.1965m/z	346.196	6.8	Asp Val Leu	C15H27N3O6	58	-2.3	RPLC-POS
34	4.52_182.0808m/z	182.081	4.5	L-Tyrosine	C9H11NO3	58.5	-1.9	RPLC-POS

## Sheet: RPLC_NEG
Table S2. Identified 665 metabolites from all samples by RPLC-NEG analysis mode
Metabolite ID	Metabolic feature	m/z	Retention time (min)	Metabolite name	Formula	Score	Mass Error (ppm)	Mode
136562	13.02_550.2231m/z	550.223	13.0167	Phe Asp Arg Asp	C23H33N7O9	40	-6.57818	RPLC-NEG
HMDB0004482	7.23_447.2024m/z	447.202	7.23407	2-Methoxyestrone 3-glucuronide	C24H32O8	40	0.00517888	RPLC-NEG
HMDB0011341	14.22_700.5278m/z	700.528	14.2183	PEP-16:0/18:1(11Z))	C39H76NO7P	40	-1.18642	RPLC-NEG
HMDB0012993	7.49_622.2736m/z	622.274	7.48672	Leukotriene C5	C30H45N3O9S	40	-10.8171	RPLC-NEG
HMDB0031690	5.33_393.1769m/z	393.177	5.32852	cis-3-Hexenyl b-primeveroside	C17H30O10	40	0.807924	RPLC-NEG
HMDB0037555	7.52_587.2497m/z	587.25	7.5204	Sandoricin	C31H40O11	40	-0.0616074	RPLC-NEG
178582	6.32_459.2446m/z	459.245	6.3193	Leu Ile Ser Glu	C20H36N4O8	40.1	-3.18544	RPLC-NEG
HMDB0005773	6.51_609.2788m/z	609.279	6.51078	Endomorphin-1	C34H38N6O5	40.1	-6.97951	RPLC-NEG
HMDB0011494	11.71_526.2933m/z	526.293	11.7138	LysoPE(0:0/22:5(4Z,7Z,10Z,13Z,16Z))	C27H46NO7P	40.1	-1.09879	RPLC-NEG
HMDB0015118	12.54_343.1690m/z	343.169	12.5369	Formoterol	C19H24N2O4	40.1	7.6575	RPLC-NEG
HMDB0015313	8.42_340.1883m/z	340.188	8.42167	Propafenone	C21H27NO3	40.1	-10.2834	RPLC-NEG
HMDB0030909	10.00_459.2731m/z	459.273	9.99823	2,3-Secoporrigenin	C27H40O6	40.1	-4.62182	RPLC-NEG
HMDB0000267	0.90_128.0353m/z	128.035	0.902467	Pyroglutamic acid	C5H7NO3	40.2	0.234686	RPLC-NEG
HMDB0001901	1.79_130.0875m/z	130.088	1.79408	Aminocaproic acid	C6H13NO2	40.2	1.23547	RPLC-NEG
HMDB0003933	6.72_377.1918m/z	377.192	6.71777	Pentosidine	C17H26N6O4	40.2	-6.63769	RPLC-NEG
HMDB0032961	9.71_284.1282m/z	284.128	9.71342	Secodemethylclausenamide	C17H19NO3	40.2	-3.52067	RPLC-NEG
HMDB0035475	11.19_550.1870m/z	550.187	11.1875	Simmondsin 2'-ferulate	C26H33NO12	40.2	-10.8067	RPLC-NEG
HMDB0000905	5.24_330.0606m/z	330.061	5.24487	Deoxyadenosine monophosphate	C10H14N5O6P	40.3	-0.780816	RPLC-NEG
HMDB0005770	5.18_499.3006m/z	499.301	5.1782	Tuftsin	C21H40N8O6	40.3	1.57783	RPLC-NEG
HMDB0031145	10.56_253.2167m/z	253.217	10.5584	5-Dodecyldihydro-2(3H)-furanone	C16H30O2	40.3	-2.35403	RPLC-NEG
HMDB0038951	8.69_551.2170m/z	551.217	8.68715	Prupaside	C27H36O12	40.3	6.60705	RPLC-NEG
HMDB0059773	9.36_244.1373m/z	244.137	9.36112	S-3-oxodecanoyl cysteamine	C12H23NO2S	40.3	-1.60385	RPLC-NEG
HMDB0000557	2.21_130.0872m/z	130.087	2.21422	L-Alloisoleucine	C6H13NO2	40.4	-1.09468	RPLC-NEG
HMDB0001328	0.86_563.0667m/z	563.067	0.8568	dTDP-D-glucose	C16H26N2O16P2	40.4	-3.16849	RPLC-NEG
HMDB0015424	6.01_644.1367m/z	644.137	6.00548	Cefoperazone	C25H27N9O8S2	40.4	2.4501	RPLC-NEG
HMDB0038542	7.35_615.3343m/z	615.334	7.35073	Goshonoside F6	C31H52O12	40.4	-6.91901	RPLC-NEG
HMDB0061014	7.28_573.2464m/z	573.246	7.2839	<i>para</i>-hydroxyatorvastatin	C33H35FN2O6	40.4	10.0556	RPLC-NEG
HMDB0113857	14.22_742.5387m/z	742.539	14.2183	PE-NMe2(16:1(9Z)/18:1(9Z))	C41H78NO8P	40.4	-0.729131	RPLC-NEG
24096	14.89_329.2475m/z	329.248	14.8874	7Z, 10Z, 13Z, 16Z, 19Z-docosapentaenoic acid	C22H34O2	40.5	-3.25605	RPLC-NEG
110062	5.41_417.1982m/z	417.198	5.40852	Ala Thr Leu Asp	C17H30N4O8	40.5	-2.10064	RPLC-NEG
HMDB0004161	8.38_587.2852m/z	587.285	8.38483	D-Urobilin	C33H40N4O6	40.5	-3.88054	RPLC-NEG
HMDB0013563	5.57_821.4405m/z	821.441	5.57302	PGP(18:3(6Z,9Z,12Z)/16:1(9Z))	C40H72O13P2	40.5	3.65154	RPLC-NEG
HMDB0029091	6.16_300.1348m/z	300.135	6.1578	Tryptophyl-Proline	C16H19N3O3	40.5	-1.90205	RPLC-NEG
HMDB0029914	2.47_286.0901m/z	286.09	2.46587	Tetraphyllin B	C12H17NO7	40.5	-10.8201	RPLC-NEG
HMDB0032622	4.63_429.1743m/z	429.174	4.62523	Phenethyl rutinoside	C20H30O10	40.5	-5.33439	RPLC-NEG
HMDB0034575	10.29_397.1858m/z	397.186	10.2927	3'-Hydroxy-T2-triol	C20H30O8	40.5	-2.42936	RPLC-NEG
HMDB0036842	6.38_587.3388m/z	587.339	6.38147	Hydratopyrrhoxanthinol	C37H48O6	40.5	1.61389	RPLC-NEG
HMDB0060622	7.08_550.2433m/z	550.243	7.07875	Endoxifen O-glucuronide	C31H37NO8	40.5	-2.40792	RPLC-NEG
45230	7.80_279.0771m/z	279.077	7.80353	AG-494	C16H12N2O3	40.6	-1.34249	RPLC-NEG
HMDB0001373	7.03_686.1412m/z	686.141	7.03275	Dephospho-CoA	C21H35N7O13P2S	40.6	-0.551365	RPLC-NEG
HMDB0010736	12.78_297.2426m/z	297.243	12.7767	3-Oxooctadecanoic acid	C18H34O3	40.6	-3.19542	RPLC-NEG
HMDB0038562	6.83_437.1816m/z	437.182	6.82993	8-Propanoylneosolaniol	C22H30O9	40.6	-0.277782	RPLC-NEG
HMDB0039084	5.56_407.1718m/z	407.172	5.55852	3-O-Methylniveusin A	C21H28O8	40.6	1.59627	RPLC-NEG
HMDB0041700	0.84_313.1118m/z	313.112	0.840467	6-Hydroxyenterolactone	C18H18O5	40.6	11.5996	RPLC-NEG
HMDB0128028	5.23_329.0915m/z	329.092	5.22803	6-(5-ethyl-2,3-dihydroxyphenoxy)-3,4,5-trihydroxyoxane-2-carboxylic acid	C14H18O9	40.6	11.2582	RPLC-NEG
183167	5.72_568.3139m/z	568.314	5.7185	Leu Tyr Phe Lys	C30H43N5O6	40.7	-0.22337	RPLC-NEG
HMDB0029008	5.54_263.1397m/z	263.14	5.54402	Phenylalanyl-Valine	C14H20N2O3	40.7	-1.70024	RPLC-NEG
HMDB0034533	8.04_793.4461m/z	793.446	8.04268	Spinasaponin A	C42H66O14	40.7	10.2724	RPLC-NEG
HMDB0041314	10.26_269.1187m/z	269.119	10.26	4-tert-Butylphenyl salicylate	C17H18O3	40.7	1.28332	RPLC-NEG
HMDB0129408	2.15_248.0539m/z	248.054	2.1549	2-{[hydroxy(4-methoxy-1-benzofuran-5-yl)methylidene]amino}acetic acid	C12H11NO5	40.7	-10.0802	RPLC-NEG
244261	5.33_508.2048m/z	508.205	5.32852	Val Asn Tyr Asp	C22H31N5O9	40.8	-0.114447	RPLC-NEG
HMDB0015574	1.72_519.0966m/z	519.097	1.71608	Latamoxef	C20H20N6O9S	40.8	5.05229	RPLC-NEG
HMDB0034590	6.57_417.0427m/z	417.043	6.56978	Shoyuflavone C	C19H14O11	40.8	-8.68622	RPLC-NEG
HMDB0039175	8.83_753.2252m/z	753.225	8.8288	Raphanusol A	C34H42O19	40.8	0.623759	RPLC-NEG
HMDB0039564	7.91_391.1408m/z	391.141	7.91487	Marmesin rhamnoside	C20H24O8	40.8	2.47191	RPLC-NEG
242461	6.63_457.2660m/z	457.266	6.62945	Val Ile Leu Asp	C21H38N4O7	40.9	-1.74566	RPLC-NEG
HMDB0000619	10.03_407.2789m/z	407.279	10.0316	Cholic acid	C24H40O5	40.9	-3.51256	RPLC-NEG
HMDB0033451	10.65_434.2108m/z	434.211	10.654	Cadabicine	C25H29N3O4	40.9	5.15918	RPLC-NEG
HMDB0140837	8.63_578.1606m/z	578.161	8.63248	5,7-dihydroxy-2-(4-hydroxyphenyl)-3-[(3,4,5-trihydroxy-6-{[(3,4,5-trihydroxy-6-methyloxan-2-yl)oxy]methyl}oxan-2-yl)oxy]-1Î»â´-chromen-1-ylium	C27H31O14+	40.9	-6.08887	RPLC-NEG
65354	5.46_447.1550m/z	447.155	5.45952	HoPhe-HoPhe-OH	C25H24N2O6	41	-2.48294	RPLC-NEG
HMDB0011470	10.65_424.2462m/z	424.246	10.654	LysoPE(0:0/14:0)	C19H40NO7P	41	-1.85077	RPLC-NEG
HMDB0013961	7.06_439.2551m/z	439.255	7.06392	O-Desmethylverapamil (D-702)	C26H36N2O4	41	-11.5473	RPLC-NEG
HMDB0014839	6.88_504.2119m/z	504.212	6.87893	Amprenavir	C25H35N3O6S	41	-10.7962	RPLC-NEG
HMDB0030172	5.36_607.2846m/z	607.285	5.35835	Oxyacanthine	C37H40N2O6	41	5.33245	RPLC-NEG
HMDB0034913	8.83_287.1400m/z	287.14	8.8288	Imazamethabenz-methyl	C16H20N2O3	41	-0.286232	RPLC-NEG
HMDB0037179	10.07_199.1340m/z	199.134	10.0651	3-Nonanon-1-yl acetate	C11H20O3	41	0.343778	RPLC-NEG
HMDB0038745	10.77_511.3017m/z	511.302	10.766	Glyuranolide	C31H44O6	41	-9.48076	RPLC-NEG
870	13.54_299.2008m/z	299.201	13.5373	13-cis-retinoic acid, Isotretinoin	C20H28O2	41.1	-2.9846	RPLC-NEG
HMDB0000884	0.84_257.0753m/z	257.075	0.840467	Ribothymidine	C10H14N2O6	41.1	-9.9887	RPLC-NEG
HMDB0005811	2.33_595.1700m/z	595.17	2.33055	Eriocitrin	C27H32O15	41.1	5.28227	RPLC-NEG
HMDB0031008	11.70_315.2531m/z	315.253	11.6995	(+)-15,16-Dihydroxyoctadecanoic acid	C18H36O4	41.1	-3.15689	RPLC-NEG
HMDB0038588	10.37_240.1598m/z	240.16	10.3715	Dioscoretine	C13H23NO3	41.1	-2.77326	RPLC-NEG
HMDB0039386	0.96_489.1926m/z	489.193	0.962133	Cymorcin diglucoside	C22H34O12	41.1	-10.5412	RPLC-NEG
HMDB0002334	7.49_165.0190m/z	165.019	7.48672	Benzoquinoneacetic acid	C8H6O4	41.2	-1.7064	RPLC-NEG
HMDB0002641	1.70_163.0398m/z	163.04	1.70042	2-Hydroxycinnamic acid	C9H8O3	41.2	-1.48118	RPLC-NEG
HMDB0009195	8.01_730.4519m/z	730.452	8.00653	PE(18:4(6Z,9Z,12Z,15Z)/18:4(6Z,9Z,12Z,15Z))	C41H66NO8P	41.2	8.94168	RPLC-NEG
HMDB0029086	6.12_316.1653m/z	316.165	6.12282	Tryptophyl-Isoleucine	C17H23N3O3	41.2	-4.25081	RPLC-NEG
HMDB0040771	5.94_791.3953m/z	791.395	5.93665	Betavulgaroside II	C41H60O15	41.2	11.7869	RPLC-NEG
HMDB0060875	3.56_537.9666m/z	537.967	3.55613	Thioguanosine 5'-triphosphate	C10H16N5O13P3S	41.2	11.2898	RPLC-NEG
HMDB0030349	12.61_306.1160m/z	306.116	12.6119	N-Acetylanonaine	C19H17NO3	41.3	7.82828	RPLC-NEG
HMDB0038804	9.59_249.1128m/z	249.113	9.5946	3,4-Dihydro-6-hydroxy-2,5,7,8-tetramethyl-2H-1-benzopyran-2-carboxylic acid	C14H18O4	41.3	-1.59692	RPLC-NEG
HMDB0038922	1.45_581.2242m/z	581.224	1.4536	(7'R)-(+)-Lyoniresinol 9'-glucoside	C28H38O13	41.3	0.373664	RPLC-NEG
HMDB0039436	8.15_669.4188m/z	669.419	8.15118	Ginsenoside Rh6	C36H62O11	41.3	-4.66968	RPLC-NEG
HMDB0039927	0.86_431.1395m/z	431.14	0.8568	4'-O-Methylglucoliquiritigenin	C22H24O9	41.3	11.0271	RPLC-NEG
160867	6.09_500.3075m/z	500.307	6.09082	Ile Glu Leu Lys	C23H43N5O7	41.4	-2.96949	RPLC-NEG
HMDB0000230	0.89_308.0983m/z	308.098	0.8873	N-Acetylneuraminic acid	C11H19NO9	41.4	-1.27204	RPLC-NEG
HMDB0013317	9.95_270.2071m/z	270.207	9.9489	Tridecanoylglycine	C15H29NO3	41.4	-1.29966	RPLC-NEG
HMDB0031944	5.39_356.1198m/z	356.12	5.39137	Niazimicin A	C16H23NO6S	41.4	6.84477	RPLC-NEG
HMDB0038232	14.56_842.4645m/z	842.464	14.5608	Azaspiracid 4	C46H69NO13	41.4	-6.10344	RPLC-NEG
HMDB0124935	7.08_725.1936m/z	725.194	7.07875	6-[(2-{4-[(3-{[3,4-dihydroxy-4-(hydroxymethyl)oxolan-2-yl]oxy}-4,5-dihydroxy-6-(hydroxymethyl)oxan-2-yl)oxy]phenyl}-4-oxo-3,4-dihydro-2H-1-benzopyran-7-yl)oxy]-3,4,5-trihydroxyoxane-2-carboxylic acid	C32H38O19	41.4	0.209219	RPLC-NEG
HMDB0127956	2.26_325.0407m/z	325.041	2.25738	2-[(6-carboxy-3,4,5-trihydroxyoxan-2-yl)oxy]-3-hydroxybutanedioic acid	C10H14O12	41.4	-1.69509	RPLC-NEG
175081	5.00_494.2250m/z	494.225	4.99688	Lys Tyr Ala Asp	C22H33N5O8	41.5	-1.36736	RPLC-NEG
198422	5.67_472.2370m/z	472.237	5.66967	Asn Val Ile Glu	C20H35N5O8	41.5	-9.15091	RPLC-NEG
HMDB0002261	11.57_243.1962m/z	243.196	11.5681	2-Hydroxymyristic acid	C14H28O3	41.5	-1.47161	RPLC-NEG
HMDB0003134	2.27_371.1788m/z	371.179	2.27188	Biocytin	C16H28N4O4S	41.5	7.88868	RPLC-NEG
HMDB0029007	5.67_327.1339m/z	327.134	5.66967	Phenylalanyl-Tyrosine	C18H20N2O4	41.5	-3.54447	RPLC-NEG
HMDB0030628	9.43_405.1674m/z	405.167	9.43293	Rubraflavone A	C25H26O5	41.5	-8.15188	RPLC-NEG
HMDB0000696	1.42_148.0438m/z	148.044	1.4191	L-Methionine	C5H11NO2S	41.6	0.0135699	RPLC-NEG
HMDB0008961	17.82_712.4921m/z	712.492	17.8166	PE(16:1(9Z)/18:2(9Z,12Z))	C39H72NO8P	41.6	-0.30218	RPLC-NEG
HMDB0028995	5.29_221.0928m/z	221.093	5.2947	Phenylalanyl-Glycine	C11H14N2O3	41.6	-1.53341	RPLC-NEG
HMDB0034899	4.91_433.1929m/z	433.193	4.90788	1,1'-Ethylidenebistryptophan	C24H26N4O4	41.6	10.9895	RPLC-NEG
HMDB0035893	6.53_717.3563m/z	717.356	6.52562	Elaterinide	C38H54O13	41.6	9.86746	RPLC-NEG
HMDB0062552	1.64_486.2185m/z	486.219	1.63725	Ac-Ser-Asp-Lys-Pro-OH	C20H33N5O9	41.6	-4.17489	RPLC-NEG
HMDB0127540	6.97_585.2275m/z	585.228	6.97127	[(1S,16R)-5,7-dihydroxy-8,8,10,12,16-pentamethyl-3-[1-(2-methyl-1,3-thiazol-4-yl)prop-1-en-2-yl]-9-oxo-17-oxa-4-azabicyclo[14.1.0]heptadec-4-en-11-yl]oxidanesulfonic acid	C27H42N2O8S2	41.6	-5.93849	RPLC-NEG
44906	15.92_410.2357m/z	410.236	15.9249	N-arachidonoyl taurine	C22H37NO4S	41.7	-3.23665	RPLC-NEG
HMDB0030935	10.13_331.2480m/z	331.248	10.1277	9,10,13-Trihydroxystearic acid	C18H36O5	41.7	-2.9783	RPLC-NEG
HMDB0129399	3.89_367.1054m/z	367.105	3.89178	3,4,5-trihydroxy-6-[1-(4-methoxy-1-benzofuran-5-yl)ethoxy]oxane-2-carboxylic acid	C17H20O9	41.7	5.3692	RPLC-NEG
45048	7.84_638.3189m/z	638.319	7.8412	Leukotriene C4 methyl ester	C31H49N3O9S	41.8	11.2405	RPLC-NEG
HMDB0010329	1.42_328.1061m/z	328.106	1.4191	Dopamine glucuronide	C14H19NO8	41.8	7.09331	RPLC-NEG
HMDB0029224	6.50_178.0870m/z	178.087	6.49595	N-methylphenylalanine	C10H13NO2	41.8	-1.70512	RPLC-NEG
HMDB0030702	10.81_431.3151m/z	431.315	10.8137	Neochlorogenin	C27H44O4	41.8	-3.54954	RPLC-NEG
HMDB0040551	5.73_195.1135m/z	195.114	5.73433	L-alpha-Amino-1H-pyrrole-1-hexanoic acid	C10H16N2O2	41.8	-2.03507	RPLC-NEG
HMDB0141328	6.21_255.0886m/z	255.089	6.21147	3-hydroxy-3-(3,4,5-trimethoxyphenyl)propanoic acid	C12H16O6	41.8	4.55651	RPLC-NEG
44910	16.27_362.2361m/z	362.236	16.2659	N-palmitoyl taurine	C18H37NO4S	41.9	-2.55091	RPLC-NEG
HMDB0033581	1.30_325.0911m/z	325.091	1.30127	trans-o-Coumaric acid 2-glucoside	C15H18O8	41.9	-5.63071	RPLC-NEG
HMDB0039617	0.96_383.1124m/z	383.112	0.962133	Piperenol B	C21H20O7	41.9	-3.30927	RPLC-NEG
HMDB0125449	9.43_371.0588m/z	371.059	9.43293	6-{[3-(3,4-dihydroxyphenyl)-2-oxopropanoyl]oxy}-3,4,5-trihydroxyoxane-2-carboxylic acid	C15H16O11	41.9	-8.55754	RPLC-NEG
2528	5.37_255.0442m/z	255.044	5.37418	N1,N4-Diacetylsulfanilamide	C10H12N2O4S	42	-1.04737	RPLC-NEG
HMDB0000888	9.61_215.1285m/z	215.129	9.61193	Undecanedioic acid	C11H20O4	42	-1.54698	RPLC-NEG
HMDB0011177	5.99_261.1241m/z	261.124	5.98782	Phenylalanylproline	C14H18N2O3	42	-1.38706	RPLC-NEG
HMDB0011506	10.03_478.2926m/z	478.293	10.0316	LysoPE(18:1(9Z)/0:0)	C23H46NO7P	42	-2.75665	RPLC-NEG
HMDB0028980	5.83_295.1113m/z	295.111	5.83417	Methionyl-Phenylalanine	C14H20N2O3S	42	-3.0926	RPLC-NEG
HMDB0029096	5.80_302.1502m/z	302.15	5.8015	Tryptophyl-Valine	C16H21N3O3	42	-2.56551	RPLC-NEG
HMDB0000138	9.65_464.3008m/z	464.301	9.64642	Glycocholic acid	C26H43NO6	42.1	-2.02738	RPLC-NEG
HMDB0031031	16.15_325.1834m/z	325.183	16.1474	2-Dodecylbenzenesulfonic acid	C18H30O3S	42.1	-2.82225	RPLC-NEG
HMDB0031367	5.65_463.2177m/z	463.218	5.6535	Linalool oxide D 3-[apiosyl-(1->6)-glucoside]	C21H36O11	42.1	-1.71335	RPLC-NEG
HMDB0135801	3.40_538.1495m/z	538.149	3.40148	2-amino-4-({1-[(carboxymethyl)-C-hydroxycarbonimidoyl]-2-{[2-hydroxy-2-methoxy-1-(7-methyl-2-oxo-2H-chromen-6-yl)ethyl]sulfanyl}ethyl}-C-hydroxycarbonimidoyl)butanoic acid	C23H29N3O10S	42.1	-1.14961	RPLC-NEG
164982	8.49_474.2255m/z	474.225	8.49183	Ile Gln Ser Glu	C19H33N5O9	42.2	10.4094	RPLC-NEG
221482	6.04_460.2198m/z	460.22	6.04065	Arg Ser Ala Glu	C17H31N7O8	42.2	7.90626	RPLC-NEG
HMDB0014487	5.99_413.1546m/z	413.155	5.98782	Diltiazem	C22H26N2O4S	42.2	1.23692	RPLC-NEG
HMDB0028998	5.85_277.1551m/z	277.155	5.85183	Phenylalanyl-Isoleucine	C15H22N2O3	42.2	-2.21786	RPLC-NEG
HMDB0037741	5.10_723.4172m/z	723.417	5.09703	Bismurrayafoline E	C48H56N2O4	42.2	0.653534	RPLC-NEG
HMDB0039696	6.66_509.1773m/z	509.177	6.65895	25,27-Dihydro-4,7-didehydro-7-deoxyphysalin A	C28H30O9	42.2	-8.57439	RPLC-NEG
HMDB0041049	5.97_619.3441m/z	619.344	5.97032	Physagulin D	C34H52O10	42.2	-7.53388	RPLC-NEG
HMDB0062445	6.16_453.1761m/z	453.176	6.1578	alpha-CEHC glucuronide	C22H30O10	42.2	-1.05463	RPLC-NEG
HMDB0033935	10.08_271.0759m/z	271.076	10.0819	Anigorufone	C19H12O2	42.3	-2.121	RPLC-NEG
HMDB0128682	8.17_239.0577m/z	239.058	8.16985	3-(6-hydroxy-7-methoxy-2H-1,3-benzodioxol-5-yl)propanoic acid	C11H12O6	42.3	6.69379	RPLC-NEG
3241	6.86_113.0352m/z	113.035	6.86277	3-Cyano-L-alanine	C4H6N2O2	42.4	-3.95153	RPLC-NEG
154453	10.83_551.3459m/z	551.346	10.8293	His Ile Lys Arg	C24H44N10O5	42.4	6.49971	RPLC-NEG
HMDB0014324	5.41_415.2273m/z	415.227	5.40852	Ramipril	C23H32N2O5	42.4	8.352	RPLC-NEG
HMDB0015144	9.65_253.0864m/z	253.086	9.64642	Ketoprofen	C16H14O3	42.4	-2.51232	RPLC-NEG
HMDB0029876	7.90_249.1241m/z	249.124	7.89653	Paucine	C13H18N2O3	42.4	-1.55837	RPLC-NEG
HMDB0128959	10.01_231.0637m/z	231.064	10.0147	7-hydroxy-6-(3-oxobutyl)-2H-chromen-2-one	C13H12O4	42.4	-11.3283	RPLC-NEG
2349	5.80_425.1991m/z	425.199	5.8015	9-Hydroxyrisperidone	C23H27FN4O3	42.5	-0.835994	RPLC-NEG
HMDB0000248	8.80_775.6793m/z	775.679	8.79615	Thyroxine	C15H11I4NO4	42.5	-0.193028	RPLC-NEG
HMDB0010407	12.21_478.3273m/z	478.327	12.2086	LysoPC(P-16:0)	C24H50NO6P	42.5	-6.25592	RPLC-NEG
HMDB0029023	8.37_245.0963m/z	245.096	8.3665	Prolyl-Methionine	C10H18N2O3S	42.5	-0.949993	RPLC-NEG
HMDB0129401	0.75_238.0334m/z	238.033	0.746467	2-{[hydroxy(6-hydroxy-2H-1,3-benzodioxol-5-yl)methylidene]amino}acetic acid	C10H9NO6	42.5	-9.55889	RPLC-NEG
8	14.74_112.0514m/z	112.051	14.739	Creatinine	C4H7N3O	42.6	-2.02712	RPLC-NEG
HMDB0013286	8.89_242.1760m/z	242.176	8.88782	N-Undecanoylglycine	C13H25NO3	42.6	-0.57833	RPLC-NEG
264553	7.91_568.3341m/z	568.334	7.91487	Leu Pro Val Leu Glu	C27H47N5O8	42.7	-1.94132	RPLC-NEG
HMDB0011493	12.51_528.3084m/z	528.308	12.5068	LysoPE(0:0/22:4(7Z,10Z,13Z,16Z))	C27H48NO7P	42.7	-2.11672	RPLC-NEG
HMDB0039379	9.75_401.1250m/z	401.125	9.74708	Chrysaloin	C21H22O8	42.7	2.02489	RPLC-NEG
HMDB0137022	2.82_316.1161m/z	316.116	2.81902	3-(3,4-dihydroxyphenyl)-N-[2-(3,4-dihydroxyphenyl)ethyl]propanimidic acid	C17H19NO5	42.7	-9.17291	RPLC-NEG
44908	16.38_388.2521m/z	388.252	16.3845	N-oleoyl taurine	C20H39NO4S	42.8	-1.66016	RPLC-NEG
62927	9.61_151.0397m/z	151.04	9.61193	Vanillin	C8H8O3	42.8	-2.38322	RPLC-NEG
HMDB0000058	5.92_328.0446m/z	328.045	5.91998	Cyclic AMP	C10H12N5O6P	42.8	-2.08199	RPLC-NEG
HMDB0000912	2.36_382.0992m/z	382.099	2.36203	Succinyladenosine	C14H17N5O8	42.8	-3.17963	RPLC-NEG
HMDB0037926	9.98_913.5031m/z	913.503	9.9819	Tragopogonsaponin L	C50H74O15	42.8	8.29544	RPLC-NEG
HMDB0030974	11.68_277.1805m/z	277.181	11.685	8-Acetoxy-4-acoren-3-one	C17H26O3	42.9	-1.46102	RPLC-NEG
HMDB0041668	0.98_485.1092m/z	485.109	0.977467	4'-Methyl-(-)-epigallocatechin 3-(4-methyl-gallate)	C24H22O11	42.9	0.447865	RPLC-NEG
HMDB0116524	5.94_787.4585m/z	787.458	5.93665	PGP(a-13:0/i-18:0)	C37H74O13P2	42.9	6.71028	RPLC-NEG
HMDB0012153	2.60_138.0555m/z	138.056	2.5992	3,4-Dihydroxybenzylamine	C7H9NO2	43.1	-3.69304	RPLC-NEG
HMDB0134937	5.54_217.0614m/z	217.061	5.54402	2-{[hydroxy(1H-indol-3-yl)methylidene]amino}acetic acid	C11H10N2O3	43.1	-2.19261	RPLC-NEG
HMDB0029332	5.77_336.1203m/z	336.12	5.76733	5-Methoxynoracronycine	C20H19NO4	43.2	-11.2768	RPLC-NEG
HMDB0030736	7.17_643.3304m/z	643.33	7.16958	Capsianoside IV	C32H52O13	43.2	-4.90008	RPLC-NEG
HMDB0035919	8.65_327.2164m/z	327.216	8.65032	Corchorifatty acid F	C18H32O5	43.2	-3.86673	RPLC-NEG
HMDB0040008	5.94_134.0601m/z	134.06	5.93665	2,3-Dihydro-1H-pyrrolizine-5-carboxaldehyde	C8H9NO	43.2	-7.67039	RPLC-NEG
211147	5.15_515.2813m/z	515.281	5.14503	Gln Leu Glu Lys	C22H40N6O8	43.3	-4.26614	RPLC-NEG
HMDB0014364	8.51_347.2430m/z	347.243	8.50867	Oxyphenonium	C21H34NO3+	43.3	-10.4091	RPLC-NEG
HMDB0028976	5.54_261.1265m/z	261.127	5.54402	Methionyl-Isoleucine	C11H22N2O3S	43.3	-4.96735	RPLC-NEG
HMDB0031737	13.15_205.1596m/z	205.16	13.151	delta-Methylionone	C14H22O	43.3	-0.690999	RPLC-NEG
HMDB0059644	5.62_682.1284m/z	682.128	5.61867	(6S)-6-beta-hydroxy-1,4,5,6-tetrahydronicotinamide-adenine dinucleotide	C21H31N7O15P2	43.3	0.520084	RPLC-NEG
65037	10.56_508.1534m/z	508.153	10.5584	Nap-Trp-OH	C29H23N3O6	43.4	4.001	RPLC-NEG
121148	5.64_536.2356m/z	536.236	5.63617	Asp Phe Glu Lys	C24H35N5O9	43.4	-1.09209	RPLC-NEG
HMDB0000707	8.67_179.0358m/z	179.036	8.66865	4-Hydroxyphenylpyruvic acid	C9H8O4	43.4	4.71215	RPLC-NEG
HMDB0011530	11.16_301.2375m/z	301.237	11.1562	MG(0:0/14:0/0:0)	C17H34O4	43.4	-3.16622	RPLC-NEG
HMDB0037365	2.47_609.1298m/z	609.13	2.46587	Quercetin 3-(3-p-coumaroylglucoside)	C30H26O14	43.4	7.86175	RPLC-NEG
HMDB0041360	5.36_379.1639m/z	379.164	5.35835	Prenyl arabinosyl-(1->6)-glucoside	C16H28O10	43.4	7.731	RPLC-NEG
HMDB0000631	10.62_448.3059m/z	448.306	10.622	Deoxycholic acid glycine conjugate	C26H43NO5	43.5	-2.01689	RPLC-NEG
HMDB0030530	5.78_644.3613m/z	644.361	5.7845	Janthitrem F	C39H51NO7	43.5	3.13256	RPLC-NEG
HMDB0032848	9.61_305.0811m/z	305.081	9.61193	2,3-Dihydro-2,3-dihydroxy-4-(4-hydroxyphenyl)-1H-phenalen-1-one	C19H14O4	43.5	-2.6465	RPLC-NEG
HMDB0033107	3.37_335.1240m/z	335.124	3.37148	Semilepidinoside A	C16H20N2O6	43.5	-2.54425	RPLC-NEG
HMDB0127944	14.87_447.0896m/z	447.09	14.8726	6-{[3,7-dihydroxy-2-(3-hydroxyphenyl)-8aH-chromen-5-yl]oxy}-3,4,5-trihydroxyoxane-2-carboxylic acid	C21H20O11	43.5	-8.31109	RPLC-NEG
HMDB0028918	6.32_316.1655m/z	316.166	6.3193	Isoleucyl-Tryptophan	C17H23N3O3	43.6	-3.59126	RPLC-NEG
HMDB0031801	3.39_268.0222m/z	268.022	3.38648	(Â±)-Mephosfolan	C8H16NO3PS2	43.6	-5.30151	RPLC-NEG
HMDB0062760	0.86_606.0749m/z	606.075	0.8568	UDP-N-acetyl-alpha-D-glucosamine(2-)	C17H27N3O17P2	43.6	0.971846	RPLC-NEG
HMDB0000933	9.88_227.1285m/z	227.129	9.88225	Traumatic acid	C12H20O4	43.7	-1.50148	RPLC-NEG
HMDB0001273	3.54_521.9892m/z	521.989	3.53997	Guanosine triphosphate	C10H16N5O14P3	43.7	11.1362	RPLC-NEG
HMDB0014698	8.83_331.1290m/z	331.129	8.8288	Zanamivir	C12H20N4O7	43.7	9.17362	RPLC-NEG
HMDB0032549	15.87_311.1680m/z	311.168	15.8655	N-Undecylbenzenesulfonic acid	C17H28O3S	43.7	-2.17103	RPLC-NEG
HMDB0128221	6.76_613.1795m/z	613.18	6.7636	3,4,5-trihydroxy-2-[hydroxy(3,4,5-trihydroxyoxan-2-yl)methyl]-6-[(2E)-3-(4-hydroxyphenyl)prop-2-enoyl]-4-[3,4,5-trihydroxy-6-(hydroxymethyl)oxan-2-yl]cyclohex-2-en-1-one	C27H34O16	43.7	3.48439	RPLC-NEG
HMDB0001248	11.54_784.1499m/z	784.15	11.5386	FAD	C27H33N9O15P2	43.8	0.000984694	RPLC-NEG
HMDB0002318	7.54_659.3249m/z	659.325	7.53805	Capsianoside I	C32H52O14	43.8	-5.32557	RPLC-NEG
141642	6.26_508.2408m/z	508.241	6.2643	Phe Ser Lys Glu	C23H35N5O8	43.9	-0.901205	RPLC-NEG
HMDB0000071	2.56_251.0777m/z	251.078	2.55537	Deoxyinosine	C10H12N4O4	43.9	-3.38853	RPLC-NEG
HMDB0034475	10.43_361.1620m/z	361.162	10.4345	Hydroxyisonobilin	C20H26O6	43.9	-10.2311	RPLC-NEG
HMDB0038069	2.35_503.0875m/z	503.088	2.34622	Gomphrenol 3-methylether 4'-glucuronide	C23H20O13	43.9	8.79426	RPLC-NEG
HMDB0060752	5.53_442.1235m/z	442.123	5.52668	3'-Azido-3'-deoxy-5'- O-beta-D-glucopyranuronosylthymidine	C16H21N5O10	43.9	4.28019	RPLC-NEG
HMDB0132954	7.22_526.1851m/z	526.185	7.21773	2-amino-4-({1-[(carboxymethyl)-C-hydroxycarbonimidoyl]-2-{[2-hydroxy-1-(4-methoxyphenyl)-4-methyl-3-oxopentyl]sulfanyl}ethyl}-C-hydroxycarbonimidoyl)butanoic acid	C23H33N3O9S	43.9	-2.52842	RPLC-NEG
44171	16.50_339.1989m/z	339.199	16.503	NORETHINDRONE ACETATE	C22H28O3	44	6.7492	RPLC-NEG
HMDB0013243	6.21_277.1551m/z	277.155	6.21147	Leucyl-phenylalanine	C15H22N2O3	44	-2.24731	RPLC-NEG
HMDB0038486	7.32_366.0493m/z	366.049	7.31673	Tetraphyllin B sulfate	C12H17NO10S	44.1	-2.0829	RPLC-NEG
HMDB0060546	9.80_412.2480m/z	412.248	9.79742	Norbuprenorphine	C25H35NO4	44.1	-3.22211	RPLC-NEG
HMDB0000626	11.58_391.2848m/z	391.285	11.5828	Deoxycholic acid	C24H40O4	44.2	-1.36058	RPLC-NEG
HMDB0038378	7.22_629.3515m/z	629.351	7.21773	Goshonoside F7	C32H54O12	44.2	-4.37628	RPLC-NEG
HMDB0124943	3.00_119.0496m/z	119.05	2.99583	3-ethenylphenol	C8H8O	44.2	-5.17615	RPLC-NEG
HMDB0013250	13.40_284.2224m/z	284.222	13.4039	Myristoylglycine	C16H31NO3	44.3	-2.59868	RPLC-NEG
HMDB0014971	3.45_366.0334m/z	366.033	3.4463	Cefaclor	C15H14ClN3O4S	44.3	3.51654	RPLC-NEG
HMDB0036381	8.44_312.1232m/z	312.123	8.44	N-cis-Feruloyltyramine	C18H19NO4	44.3	-2.91969	RPLC-NEG
HMDB0060617	8.24_351.1011m/z	351.101	8.23618	Penicilloic acid	C16H20N2O5S	44.3	-2.6831	RPLC-NEG
34535	7.39_245.0951m/z	245.095	7.38507	N-Acetyl-DL-tryptophan	C13H14N2O3	44.4	7.94485	RPLC-NEG
241241	5.77_506.2610m/z	506.261	5.76733	Val Phe Lys Asp	C24H37N5O7	44.4	-2.10092	RPLC-NEG
HMDB0028711	8.89_310.1627m/z	310.163	8.88782	Arginyl-Histidine	C12H21N7O3	44.4	-1.92623	RPLC-NEG
HMDB0030291	12.37_526.3501m/z	526.35	12.3733	Daphniphylline	C32H49NO5	44.4	-7.07651	RPLC-NEG
HMDB0032173	12.15_273.0912m/z	273.091	12.1484	Bakers yeast extract	C19H14O2	44.4	-3.35768	RPLC-NEG
HMDB0036340	9.43_415.1960m/z	415.196	9.43293	Ethyl 7-epi-12-hydroxyjasmonate glucoside	C20H32O9	44.4	-3.22756	RPLC-NEG
HMDB0060661	8.22_617.2610m/z	617.261	8.22135	APC	C33H38N4O8	44.4	-1.12801	RPLC-NEG
HMDB0006789	1.70_421.0771m/z	421.077	1.70042	Lactose 6-phosphate	C12H23O14P	44.5	4.4521	RPLC-NEG
HMDB0034362	6.45_549.2766m/z	549.277	6.44945	Desglucocheirotoxin	C29H42O10	44.5	11.032	RPLC-NEG
HMDB0036335	0.92_387.1122m/z	387.112	0.917467	2,4,6-Phenanthrenetriol 2-O-b-D-glucoside	C20H20O8	44.5	9.38624	RPLC-NEG
HMDB0000273	5.33_241.0828m/z	241.083	5.32852	Thymidine	C10H14N2O5	44.6	-0.610726	RPLC-NEG
HMDB0000625	0.80_195.0505m/z	195.051	0.800967	Gluconic acid	C6H12O7	44.6	-2.49923	RPLC-NEG
HMDB0011174	5.54_227.1397m/z	227.14	5.54402	Isoleucylproline	C11H20N2O3	44.6	-2.03556	RPLC-NEG
HMDB0029323	9.42_300.0869m/z	300.087	9.41843	Citpressine I	C16H15NO5	44.6	-2.66197	RPLC-NEG
HMDB0035725	5.19_629.3627m/z	629.363	5.19487	Ganoderic acid Mc	C36H54O9	44.6	-10.8578	RPLC-NEG
HMDB0129028	4.88_469.1449m/z	469.145	4.87922	3,4,5-trihydroxy-6-{3-hydroxy-5-[(E)-2-(4-hydroxyphenyl)ethenyl]-2-[(1E)-3-methylbuta-1,3-dien-1-yl]phenoxy}oxane-2-carboxylic acid	C25H26O9	44.6	-11.7902	RPLC-NEG
HMDB0028694	5.33_235.1082m/z	235.108	5.32852	Alanyl-Phenylalanine	C12H16N2O3	44.7	-2.5989	RPLC-NEG
HMDB0029112	5.85_327.1340m/z	327.134	5.85183	Tyrosyl-Phenylalanine	C18H20N2O4	44.7	-3.13521	RPLC-NEG
HMDB0029830	10.10_365.1174m/z	365.117	10.0967	N-Caffeoyltryptophan	C20H18N2O5	44.7	8.34557	RPLC-NEG
HMDB0001520	7.17_455.0963m/z	455.096	7.16958	Flavin Mononucleotide	C17H21N4O9P	44.8	-2.17296	RPLC-NEG
HMDB0013623	10.21_309.2041m/z	309.204	10.2101	12(13)Ep-9-KODE	C18H30O4	44.8	-9.75822	RPLC-NEG
4289	15.51_255.2328m/z	255.233	15.5107	Isopalmitic acid	C16H32O2	44.9	-0.762834	RPLC-NEG
HMDB0028920	5.26_229.1553m/z	229.155	5.26153	Isoleucyl-Valine	C11H22N2O3	44.9	-2.19053	RPLC-NEG
HMDB0112334	13.14_804.5752m/z	804.575	13.136	PS(15:0/22:0)	C43H84NO10P	44.9	-1.02809	RPLC-NEG
HMDB0129407	2.78_395.0643m/z	395.064	2.77535	3,4,5-trihydroxy-6-{[2-(4-methoxy-1-benzofuran-5-yl)-2-oxoacetyl]oxy}oxane-2-carboxylic acid	C17H16O11	44.9	5.92639	RPLC-NEG
HMDB0000304	3.86_606.0741m/z	606.074	3.86162	Uridine diphosphate-N-acetylgalactosamine	C17H27N3O17P2	45	-0.243655	RPLC-NEG
HMDB0010223	12.31_295.2268m/z	295.227	12.3144	9-HODE	C18H32O3	45	-3.46796	RPLC-NEG
HMDB0029404	2.64_333.0910m/z	333.091	2.6432	(S)-a-Amino-2,5-dihydro-5-oxo-4-isoxazolepropanoic acid N2-glucoside	C12H18N2O9	45	-8.72023	RPLC-NEG
HMDB0031094	13.20_301.1650m/z	301.165	13.196	Glycerol tributanoate	C15H26O6	45	-2.34344	RPLC-NEG
HMDB0124839	5.21_451.1005m/z	451.101	5.21153	6,12-bis(3,4-dihydroxyphenyl)-8,13-dihydroxy-3,11-dioxatricyclo[8.4.0.0Â²,â·]tetradeca-1(10),2(7),8-trien-4-one	C24H20O9	45	-6.5033	RPLC-NEG
HMDB0011352	14.56_722.5129m/z	722.513	14.5608	PE(P-16:0/20:4(5Z,8Z,11Z,14Z))	C41H74NO7P	45.1	-0.180376	RPLC-NEG
HMDB0014454	8.13_752.4066m/z	752.407	8.13285	Vindesine	C43H55N5O7	45.1	5.0047	RPLC-NEG
HMDB0059719	8.17_201.1128m/z	201.113	8.16985	Heptylmalonic acid	C10H18O4	45.1	-2.10848	RPLC-NEG
HMDB0062748	8.71_367.2112m/z	367.211	8.70582	20-hydroxylipoxin A4	C20H32O6	45.1	-3.80908	RPLC-NEG
HMDB0001265	0.87_243.0272m/z	243.027	0.872133	Fucose 1-phosphate	C6H13O8P	45.2	-1.46179	RPLC-NEG
HMDB0006488	0.75_172.0618m/z	172.062	0.746467	N-Acetyl-L-glutamate 5-semialdehyde	C7H11NO4	45.2	1.82176	RPLC-NEG
HMDB0035339	10.98_351.2163m/z	351.216	10.9847	Sterebin C	C20H32O5	45.3	-3.92761	RPLC-NEG
HMDB0035368	10.24_510.2827m/z	510.283	10.2434	Cytochalasin Ppho	C30H41NO6	45.3	-6.68174	RPLC-NEG
HMDB0060897	6.60_431.1930m/z	431.193	6.59995	Diphenhydramine N-glucuronide	C23H30NO7+	45.3	-4.54513	RPLC-NEG
HMDB0002203	10.36_187.1336m/z	187.134	10.3566	3-Hydroxycapric acid	C10H20O3	45.4	-1.76916	RPLC-NEG
HMDB0014935	5.56_159.0925m/z	159.092	5.55852	Tolazoline	C10H12N2	45.4	-1.91892	RPLC-NEG
HMDB0031513	8.33_173.1179m/z	173.118	8.33067	(Â±)-3-Hydroxynonanoic acid	C9H18O3	45.4	-2.18855	RPLC-NEG
HMDB0032492	3.49_122.0607m/z	122.061	3.49213	2-Propionylpyrrole	C7H9NO	45.4	-3.50826	RPLC-NEG
264075	5.33_474.2546m/z	474.255	5.32852	Ser Leu Ser Gly Leu	C20H37N5O8	45.5	-5.00511	RPLC-NEG
HMDB0010360	10.43_587.3581m/z	587.358	10.4345	25-Hydroxyvitamin D2 25-(beta-glucuronide)	C34H52O8	45.5	-1.49165	RPLC-NEG
HMDB0240280	1.22_94.9803m/z	94.9803	1.21862	Mesylate	CH4O3S	45.5	-6.1205	RPLC-NEG
HMDB0001999	14.13_301.2166m/z	301.217	14.1288	Eicosapentaenoic acid	C20H30O2	45.6	-2.23658	RPLC-NEG
HMDB0003556	6.25_425.1415m/z	425.141	6.24647	Chitobiose	C15H26N2O12	45.6	0.419588	RPLC-NEG
HMDB0013272	11.99_256.1915m/z	256.191	11.9868	N-Lauroylglycine	C14H27NO3	45.6	-1.38398	RPLC-NEG
HMDB0040571	9.10_383.0590m/z	383.059	9.10228	2-O-Feruloylhydroxycitric acid	C16H16O11	45.6	-7.67089	RPLC-NEG
HMDB0000821	6.30_192.0669m/z	192.067	6.30097	Phenylacetylglycine	C10H11NO3	45.7	1.34069	RPLC-NEG
HMDB0014959	2.98_272.0509m/z	272.051	2.98117	Carprofen	C15H12ClNO2	45.7	9.27803	RPLC-NEG
HMDB0060065	11.09_194.0820m/z	194.082	11.0937	N-methyl-4,6,7-trihydroxy-1,2,3,4-tetrahydroisoquinoline	C10H13NO3	45.7	-1.24742	RPLC-NEG
HMDB0061691	12.63_466.2927m/z	466.293	12.6269	1-Heptadecanoylglycerophosphoethanolamine	C22H46NO7P	45.7	-2.58463	RPLC-NEG
HMDB0011504	11.19_450.2620m/z	450.262	11.1875	LysoPE(16:1(9Z)/0:0)	C21H42NO7P	45.8	-1.4528	RPLC-NEG
HMDB0033613	7.47_738.3472m/z	738.347	7.46923	Glabrin D	C36H49N7O10	45.8	0.481413	RPLC-NEG
HMDB0035358	11.16_249.1489m/z	249.149	11.1562	Ketosantalic acid	C15H22O3	45.8	-2.67321	RPLC-NEG
40874	16.49_483.2717m/z	483.272	16.4882	PG(16:0/0:0)[U]	C22H45O9P	45.9	-2.30902	RPLC-NEG
45460	10.16_325.2009m/z	325.201	10.1606	2,3-dinor Prostaglandin E1	C18H30O5	45.9	-3.59038	RPLC-NEG
228867	4.95_473.2712m/z	473.271	4.95105	Ser Gln Leu Lys	C20H38N6O7	45.9	-3.64845	RPLC-NEG
HMDB0000930	3.80_147.0451m/z	147.045	3.80078	trans-Cinnamic acid	C9H8O2	45.9	-0.0237183	RPLC-NEG
HMDB0013220	0.75_320.0618m/z	320.062	0.746467	Beta-Citryl-L-glutamic acid	C11H15NO10	45.9	-1.7052	RPLC-NEG
HMDB0029139	5.10_279.1345m/z	279.135	5.09703	Valyl-Tyrosine	C14H20N2O4	45.9	-1.75225	RPLC-NEG
HMDB0035072	7.45_192.1024m/z	192.102	7.45407	2-Methylpropyl 2-aminobenzoate	C11H15NO2	45.9	-2.89847	RPLC-NEG
HMDB0039656	9.02_202.0866m/z	202.087	9.0228	5-(2-Furanyl)-1,2,3,4,5,6-hexahydro-7H-cyclopenta[b]pyridin-7-one	C12H13NO2	45.9	-3.56241	RPLC-NEG
HMDB0040615	8.89_225.1492m/z	225.149	8.88782	4,5-Dihydrovomifoliol	C13H22O3	45.9	-1.84076	RPLC-NEG
HMDB0011514	12.05_502.2929m/z	502.293	12.0455	LysoPE(20:3(11Z,14Z,17Z)/0:0)	C25H46NO7P	46	-2.05389	RPLC-NEG
HMDB0028919	5.54_293.1500m/z	293.15	5.54402	Isoleucyl-Tyrosine	C15H22N2O4	46	-2.2833	RPLC-NEG
HMDB0031007	10.13_323.2214m/z	323.221	10.1277	1-Acetoxy-2-hydroxy-16-heptadecyn-4-one	C19H32O4	46	-4.27757	RPLC-NEG
HMDB0059786	5.16_874.4187m/z	874.419	5.16153	Gliadorphin	C43H57N9O11	46	9.34728	RPLC-NEG
129268	5.94_534.2904m/z	534.29	5.93665	Glu Phe Leu Lys	C26H41N5O7	46.1	-5.39196	RPLC-NEG
HMDB0000094	0.77_191.0196m/z	191.02	0.767633	Citric acid	C6H8O7	46.1	-0.431287	RPLC-NEG
HMDB0000121	5.77_440.1316m/z	440.132	5.76733	Folic acid	C19H19N7O6	46.1	-1.79088	RPLC-NEG
HMDB0029303	9.23_287.0925m/z	287.093	9.23162	1-(3-Methoxy-4-hydroxy)-phenyl-6,7-dihydroxy-isochroman	C16H16O5	46.1	0.157239	RPLC-NEG
HMDB0038546	6.37_527.2483m/z	527.248	6.3658	ent-6R,16bOH,17-Trihydroxy-7-oxo-6,7-seco-19,6-kauranolide 6-O-glucoside	C26H40O11	46.1	-2.86392	RPLC-NEG
HMDB0038660	9.39_281.1386m/z	281.139	9.38977	Dihydrophaseic acid	C15H22O5	46.1	-2.93422	RPLC-NEG
HMDB0038732	4.78_487.2514m/z	487.251	4.77757	alpha-Ionol O-[arabinosyl-(1->6)-glucoside]	C24H40O10	46.1	-7.07699	RPLC-NEG
HMDB0038995	10.53_283.1334m/z	283.133	10.5265	(S)-17-Hydroxy-9,11,13,15-octadecatetraynoic acid	C18H20O3	46.1	-1.95066	RPLC-NEG
HMDB0000786	2.26_151.0262m/z	151.026	2.25738	Oxypurinol	C5H4N4O2	46.2	0.173613	RPLC-NEG
HMDB0012108	13.34_508.3395m/z	508.34	13.3445	LysoPC(17:0)	C25H52NO7P	46.2	-2.59712	RPLC-NEG
HMDB0029989	7.39_463.2163m/z	463.216	7.38507	Dulciol B	C28H32O6	46.2	7.90438	RPLC-NEG
HMDB0030524	8.57_165.9789m/z	165.979	8.56915	2(3H)-Benzothiazolethione	C7H5NS2	46.2	-1.28127	RPLC-NEG
HMDB0059614	7.35_437.0858m/z	437.086	7.35073	Riboflavin cyclic-4',5'-phosphate	C17H19N4O8P	46.2	-2.16609	RPLC-NEG
HMDB0128019	6.99_247.0275m/z	247.028	6.98725	(4-ethyl-2-hydroxy-6-methoxyphenyl)oxidanesulfonic acid	C9H12O6S	46.2	-2.55985	RPLC-NEG
HMDB0001043	14.74_303.2324m/z	303.232	14.739	Arachidonic acid	C20H32O2	46.3	-1.69442	RPLC-NEG
HMDB0011354	16.35_720.4950m/z	720.495	16.3548	PE(P-16:0/20:5(5Z,8Z,11Z,14Z,17Z))	C41H72NO7P	46.3	-3.23329	RPLC-NEG
96392	7.63_144.0450m/z	144.045	7.63455	4-formyl Indole	C9H7NO	46.4	-3.03892	RPLC-NEG
HMDB0062177	5.64_252.0873m/z	252.087	5.63617	N-lactoyl-Tyrosine	C12H15NO5	46.4	-1.71191	RPLC-NEG
HMDB0135279	7.97_149.0605m/z	149.06	7.9697	3-(4-hydroxyphenyl)propanal	C9H10O2	46.4	-2.14243	RPLC-NEG
44661	5.78_326.2074m/z	326.207	5.7845	DIPROTIN B	C16H29N3O4	46.5	-3.39886	RPLC-NEG
HMDB0029078	10.67_317.1284m/z	317.128	10.67	Tryptophyl-Asparagine	C15H18N4O4	46.5	8.92343	RPLC-NEG
HMDB0029782	3.76_373.1833m/z	373.183	3.75512	6-Epi-7-isocucurbic acid glucoside	C18H30O8	46.5	-9.4516	RPLC-NEG
HMDB0031436	2.88_94.9804m/z	94.9804	2.87752	Silicic acid	H4O4Si	46.5	-2.45584	RPLC-NEG
85008	8.92_641.3147m/z	641.315	8.9178	Steviobioside	C32H50O13	46.6	-4.99715	RPLC-NEG
HMDB0000697	10.45_653.2623m/z	653.262	10.4494	Isocoproporphyrin	C36H38N4O8	46.6	0.879577	RPLC-NEG
HMDB0011507	11.58_476.2775m/z	476.277	11.5828	LysoPE(18:2(9Z,12Z)/0:0)	C23H44NO7P	46.6	-1.60999	RPLC-NEG
HMDB0012267	6.58_289.1015m/z	289.102	6.58445	N-Succinyl-L,L-2,6-diaminopimelate	C11H18N2O7	46.6	-8.94774	RPLC-NEG
HMDB0029819	7.79_283.1183m/z	283.118	7.78603	2-Phenylethyl beta-D-glucopyranoside	C14H20O6	46.6	-1.3099	RPLC-NEG
HMDB0038238	5.05_483.2197m/z	483.22	5.04572	Plantaricin BN	C24H36O10	46.6	-7.90199	RPLC-NEG
HMDB0128947	0.87_277.0729m/z	277.073	0.872133	8-(1,2-dihydroxypropan-2-yl)-9-hydroxy-2H,8H,9H-furo[2,3-h]chromen-2-one	C14H14O6	46.6	4.10072	RPLC-NEG
HMDB0010381	12.06_480.3085m/z	480.309	12.0599	LysoPC(15:0)	C23H48NO7P	46.7	-2.17472	RPLC-NEG
HMDB0011477	11.40_476.2774m/z	476.277	11.4002	LysoPE(0:0/18:2(9Z,12Z))	C23H44NO7P	46.7	-1.78418	RPLC-NEG
HMDB0001274	5.06_401.0142m/z	401.014	5.0627	dTDP	C10H16N2O11P2	46.8	-3.72042	RPLC-NEG
HMDB0002097	8.83_149.0605m/z	149.061	8.8288	4-Ethylbenzoic acid	C9H10O2	46.8	-1.96596	RPLC-NEG
HMDB0002658	8.17_138.0193m/z	138.019	8.16985	6-Hydroxynicotinic acid	C6H5NO3	46.8	-2.47172	RPLC-NEG
HMDB0005923	10.88_284.0917m/z	284.092	10.8752	N4-Acetylcytidine	C11H15N3O6	46.8	10.0289	RPLC-NEG
HMDB0006569	1.02_632.2041m/z	632.204	1.02497	6'-Sialyllactose	C23H39NO19	46.8	-0.409817	RPLC-NEG
HMDB0008926	13.14_716.5224m/z	716.522	13.136	PE(16:0/18:1(11Z))	C39H76NO8P	46.8	-1.60591	RPLC-NEG
HMDB0011129	13.29_480.3093m/z	480.309	13.2854	LysoPE(0:0/18:0)	C23H48NO7P	46.8	-0.475101	RPLC-NEG
HMDB0028808	5.44_331.1401m/z	331.14	5.44235	Glutaminyltryptophan	C16H20N4O4	46.8	-3.12498	RPLC-NEG
HMDB0029134	5.72_263.1398m/z	263.14	5.7185	Valyl-Phenylalanine	C14H20N2O3	46.8	-1.378	RPLC-NEG
HMDB0034915	10.94_349.1643m/z	349.164	10.937	Calonectrin	C19H26O6	46.8	-3.8469	RPLC-NEG
HMDB0059789	7.02_891.4225m/z	891.422	7.01792	Valorphin	C44H60N8O12	46.8	-3.70221	RPLC-NEG
HMDB0060928	5.70_642.3217m/z	642.322	5.70183	Buprenorphine glucuronide	C35H49NO10	46.8	-10.413	RPLC-NEG
109563	5.28_451.1824m/z	451.182	5.27803	Ala Ser Phe Glu	C20H28N4O8	46.9	-2.28305	RPLC-NEG
166147	4.82_487.2864m/z	487.286	4.8214	Ile Thr Gln Lys	C21H40N6O7	46.9	-4.36078	RPLC-NEG
HMDB0001178	0.96_558.0636m/z	558.064	0.962133	Adenosine diphosphate ribose	C15H23N5O14P2	46.9	-1.46074	RPLC-NEG
HMDB0010379	11.46_466.2922m/z	466.292	11.4625	LysoPC(14:0/0:0)	C22H46NO7P	46.9	-3.6514	RPLC-NEG
HMDB0011617	4.79_346.0559m/z	346.056	4.79223	Adenosine 2'-phosphate	C10H14N5O7P	46.9	0.154101	RPLC-NEG
HMDB0032906	10.26_491.1909m/z	491.191	10.26	Isolariciresinol 9'-O-alpha-L-arabinofuranoside	C25H32O10	46.9	-2.79778	RPLC-NEG
HMDB0040912	3.01_373.1242m/z	373.124	3.01067	N-[(5-Hydroxy-2-pyridinyl)methyl]adenosine	C16H18N6O5	46.9	-6.49243	RPLC-NEG
HMDB0001201	0.86_442.0158m/z	442.016	0.8568	Guanosine diphosphate	C10H15N5O11P2	47	-2.91287	RPLC-NEG
HMDB0006344	6.66_263.1032m/z	263.103	6.65895	Phenylacetylglutamine	C13H16N2O4	47	-2.17143	RPLC-NEG
HMDB0010383	11.80_492.3085m/z	492.309	11.8	LysoPC(16:1(9Z)/0:0)	C24H48NO7P	47	-2.08861	RPLC-NEG
HMDB0040756	10.42_309.1697m/z	309.17	10.4187	3-Hydroxy-6,8-dimethoxy-7(11)-eremophilen-12,8-olide	C17H26O5	47	-3.22938	RPLC-NEG
HMDB0061170	10.88_470.1455m/z	470.146	10.8752	Norfluoxetine glucuronide	C22H24F3NO7	47	4.87342	RPLC-NEG
HMDB0029955	0.86_269.0877m/z	269.088	0.8568	D-erythro-L-galacto-Nonulose	C9H18O9	47.1	-0.32007	RPLC-NEG
HMDB0002815	12.96_520.3397m/z	520.34	12.9567	LysoPC(18:1(9Z))	C26H52NO7P	47.2	-2.18444	RPLC-NEG
HMDB0031586	12.24_447.1346m/z	447.135	12.2389	7-Hydroxy-8-O-methylaloin B	C22H24O10	47.2	10.9009	RPLC-NEG
HMDB0116054	10.05_948.4695m/z	948.47	10.0484	CDP-DG(18:2(9Z,11Z)/i-14:0)	C44H77N3O15P2	47.2	-6.5188	RPLC-NEG
HMDB0240253	0.96_166.0176m/z	166.018	0.962133	N-Acetyltaurine	C4H9NO4S	47.2	-1.84798	RPLC-NEG
36301	10.70_335.2214m/z	335.221	10.7019	5S,15S-DiHETE	C20H32O4	47.3	-4.07247	RPLC-NEG
HMDB0000288	0.95_323.0282m/z	323.028	0.9473	Uridine 5'-monophosphate	C9H13N2O9P	47.3	-1.35841	RPLC-NEG
HMDB0000295	0.75_402.9949m/z	402.995	0.746467	Uridine 5'-diphosphate	C9H14N2O12P2	47.3	-0.140564	RPLC-NEG
HMDB0001227	0.98_321.0484m/z	321.048	0.977467	5-Thymidylic acid	C10H15N2O8P	47.3	-2.75496	RPLC-NEG
HMDB0015546	5.24_364.1503m/z	364.15	5.24487	Propericiazine	C21H23N3OS	47.3	3.69574	RPLC-NEG
HMDB0030753	8.80_327.0495m/z	327.05	8.79615	Aflatoxin Q1	C17H12O7	47.3	-4.61943	RPLC-NEG
HMDB0033783	9.58_289.0689m/z	289.069	9.57727	Marshrin	C15H14O6	47.3	-9.70559	RPLC-NEG
HMDB0124741	6.58_727.1200m/z	727.12	6.58445	(2,6-dihydroxy-4-{7-methyl-11-oxo-4-[(3,4,5-trihydroxy-6-{[(3,4,5-trihydroxy-6-methyloxan-2-yl)oxy]methyl}oxan-2-yl)oxy]-2,8-dioxatricyclo[7.3.1.0âµ,Â¹Â³]trideca-1(12),3,5(13),6,9-pentaen-3-yl}phenoxy)dihydroxyoxo-Î»â¶-sulfanylium	C30H32O19S	47.3	2.01942	RPLC-NEG
HMDB0004704	11.54_313.2381m/z	313.238	11.5386	9,10-DHOME	C18H34O4	47.4	-1.10283	RPLC-NEG
HMDB0029090	6.45_350.1484m/z	350.148	6.44945	Tryptophyl-Phenylalanine	C20H21N3O3	47.4	-7.51242	RPLC-NEG
HMDB0002759	5.13_369.1770m/z	369.177	5.12853	Androsterone sulfate	C19H30O5S	47.5	7.7929	RPLC-NEG
45513	6.37_311.1392m/z	311.139	6.3658	(S)-HDAC-42	C18H20N2O3	47.6	-3.03459	RPLC-NEG
HMDB0029225	7.95_348.1916m/z	348.192	7.9512	Coutaric acid	C18H27N3O4	47.6	-3.72158	RPLC-NEG
HMDB0030180	7.99_479.2985m/z	479.299	7.9882	Crustecdysone	C27H44O7	47.6	-6.03877	RPLC-NEG
HMDB0062550	2.32_260.0229m/z	260.023	2.31588	2-Methoxyacetaminophen sulfate	C9H11NO6S	47.6	-1.9245	RPLC-NEG
HMDB0130450	1.87_361.0375m/z	361.037	1.87173	3,4,5-trihydroxy-6-(2,3,4,6-tetrahydroxybenzoyloxy)oxane-2-carboxylic acid	C13H14O12	47.6	-10.4668	RPLC-NEG
163367	4.92_527.3666m/z	527.367	4.92222	Ile Leu Arg Lys	C24H48N8O5	47.7	-1.77371	RPLC-NEG
HMDB0001964	8.46_179.0351m/z	179.035	8.45833	Caffeic acid	C9H8O4	47.7	0.470283	RPLC-NEG
HMDB0010201	12.10_311.2215m/z	311.222	12.1039	12,13-DiHODE	C18H32O4	47.7	-4.10495	RPLC-NEG
HMDB0028783	6.11_217.0647m/z	217.065	6.10582	Cysteinyl-Proline	C8H14N2O3S	47.7	-2.6583	RPLC-NEG
HMDB0028810	1.40_244.1298m/z	244.13	1.40177	Glutaminylvaline	C10H19N3O4	47.7	-2.02834	RPLC-NEG
HMDB0028912	1.59_258.1817m/z	258.182	1.58842	Isoleucyl-Lysine	C12H25N3O3	47.7	-2.36115	RPLC-NEG
HMDB0029113	6.02_277.1218m/z	277.122	6.02282	Tyrosyl-Proline	C14H18N2O4	47.7	8.75527	RPLC-NEG
HMDB0112327	13.15_776.5477m/z	776.548	13.151	PS(15:0/20:0)	C41H80NO10P	47.7	3.86866	RPLC-NEG
HMDB0000195	4.92_267.0732m/z	267.073	4.92222	Inosine	C10H12N4O5	47.8	-1.10194	RPLC-NEG
HMDB0000969	10.46_443.2784m/z	443.278	10.464	1,25-Dihydroxyvitamin D3-26,23-lactone	C27H40O5	47.8	-4.20364	RPLC-NEG
HMDB0003219	8.55_209.0669m/z	209.067	8.55432	Sedoheptulose	C7H14O7	47.9	0.832192	RPLC-NEG
HMDB0011172	2.36_245.1138m/z	245.114	2.36203	gamma-Glutamylvaline	C10H18N2O5	47.9	-2.00607	RPLC-NEG
HMDB0029116	5.94_366.1451m/z	366.145	5.93665	Tyrosyl-Tryptophan	C20H21N3O4	47.9	-2.17314	RPLC-NEG
HMDB0037841	2.35_310.0962m/z	310.096	2.34622	N-(1-Deoxy-1-fructosyl)methionine	C11H21NO7S	47.9	-1.34713	RPLC-NEG
HMDB0028910	5.65_243.1709m/z	243.171	5.6535	Isoleucyl-Isoleucine	C12H24N2O3	48	-2.19374	RPLC-NEG
HMDB0028986	5.16_247.1137m/z	247.114	5.16153	Methionyl-Valine	C10H20N2O3S	48	6.14337	RPLC-NEG
HMDB0041722	15.57_431.0947m/z	431.095	15.5699	Dihydrodaidzein 7-O-glucuronide	C21H20O10	48	-8.40867	RPLC-NEG
HMDB0000061	0.98_426.0213m/z	426.021	0.977467	Adenosine 3',5'-diphosphate	C10H15N5O10P2	48.2	-1.91339	RPLC-NEG
HMDB0028684	0.95_191.0491m/z	191.049	0.9473	Alanyl-Cysteine	C6H12N2O3S	48.2	-2.6891	RPLC-NEG
HMDB0129469	8.83_495.0749m/z	495.075	8.8288	6-{4-[3-(3,4-dihydroxyphenyl)-2-oxopropanoyl]-2,3,5-trihydroxyphenoxy}-3,4,5-trihydroxyoxane-2-carboxylic acid	C21H20O14	48.2	-6.34652	RPLC-NEG
HMDB0002060	7.40_528.1997m/z	528.2	7.40223	O-6-deoxy-a-L-galactopyranosyl-(1->2)-O-b-D-galactopyranosyl-(1->3)-2-(acetylamino)-2-deoxy-D-Galactose	C20H35NO15	48.3	11.9167	RPLC-NEG
HMDB0015186	6.60_333.0908m/z	333.091	6.59995	Penicillin G	C16H18N2O4S	48.3	-2.05345	RPLC-NEG
HMDB0030143	10.28_229.1436m/z	229.144	10.2764	Talaromycin A	C12H22O4	48.3	-4.18771	RPLC-NEG
HMDB0034618	6.43_283.0830m/z	283.083	6.43213	2-O-Benzoyl-D-glucose	C13H16O7	48.3	2.39325	RPLC-NEG
HMDB0002043	10.45_177.0917m/z	177.092	10.4494	5-Phenylvaleric acid	C11H14O2	48.4	-2.2118	RPLC-NEG
HMDB0011519	11.06_498.2621m/z	498.262	11.0633	LysoPE(20:5(5Z,8Z,11Z,14Z,17Z)/0:0)	C25H42NO7P	48.4	-1.10206	RPLC-NEG
HMDB0029263	9.01_329.0656m/z	329.066	9.0058	3,7-Dimethylquercetin	C17H14O7	48.4	-3.14549	RPLC-NEG
HMDB0000133	4.89_282.0842m/z	282.084	4.89355	Guanosine	C10H13N5O5	48.5	-0.576485	RPLC-NEG
HMDB0000672	11.58_285.2064m/z	285.206	11.5828	Hexadecanedioic acid	C16H30O4	48.6	-2.62264	RPLC-NEG
HMDB0011503	12.00_452.2778m/z	452.278	12.0013	LysoPE(16:0/0:0)	C21H44NO7P	48.6	-0.985445	RPLC-NEG
HMDB0038568	10.85_420.2499m/z	420.25	10.845	PC-M6	C27H35NO3	48.6	-10.6818	RPLC-NEG
HMDB0000299	2.50_283.0678m/z	283.068	2.4962	Xanthosine	C10H12N4O6	48.7	-1.99027	RPLC-NEG
HMDB0000872	10.42_257.1750m/z	257.175	10.4187	Tetradecanedioic acid	C14H26O4	48.7	-3.18132	RPLC-NEG
HMDB0011505	12.34_478.2936m/z	478.294	12.3441	LysoPE(18:1(11Z)/0:0)	C23H46NO7P	48.7	-0.723767	RPLC-NEG
HMDB0013894	7.69_233.0928m/z	233.093	7.69338	S-4-Hydroxymephenytoin	C12H14N2O3	48.7	-1.4197	RPLC-NEG
HMDB0028868	2.91_258.1457m/z	258.146	2.90683	Hydroxyprolyl-Lysine	C11H21N3O4	48.7	-0.86359	RPLC-NEG
HMDB0029140	4.10_215.1396m/z	215.14	4.1026	Valyl-Valine	C10H20N2O3	48.7	-2.48508	RPLC-NEG
6151	0.75_259.0224m/z	259.022	0.746467	D-Myoinositol 4-phosphate	C6H13O9P	48.8	-0.320301	RPLC-NEG
245487	3.54_402.2345m/z	402.234	3.53997	Val Ser Ala Lys	C17H33N5O6	48.8	-3.28172	RPLC-NEG
HMDB0033300	7.12_375.1288m/z	375.129	7.12358	(1RS,2RS)-Guaiacylglycerol 1-glucoside	C16H24O10	48.8	-2.44553	RPLC-NEG
HMDB0094711	7.40_171.1023m/z	171.102	7.40223	9-Oxo-nonanoic acid	C9H16O3	48.8	-2.12167	RPLC-NEG
62807	9.43_143.0498m/z	143.05	9.43293	1-Naphthol	C10H8O	48.9	-2.75728	RPLC-NEG
HMDB0036872	12.51_593.3636m/z	593.364	12.5068	7,8-Dehydroastaxanthianthin	C40H50O4	48.9	0.018329	RPLC-NEG
HMDB0000244	6.21_375.1304m/z	375.13	6.21147	Riboflavin	C17H20N4O6	49	-1.52874	RPLC-NEG
HMDB0035722	10.43_293.1756m/z	293.176	10.4345	Tanacetol A	C17H26O4	49	-0.871417	RPLC-NEG
HMDB0040247	10.88_167.1441m/z	167.144	10.8752	2-Undecenal	C11H20O	49	-0.462548	RPLC-NEG
HMDB0000157	2.44_135.0314m/z	135.031	2.43653	Hypoxanthine	C5H4N4O	49.1	0.880234	RPLC-NEG
HMDB0001499	0.96_588.0742m/z	588.074	0.962133	GDP-D-Rhamnose	C16H25N5O15P2	49.1	-1.26706	RPLC-NEG
HMDB0029018	5.54_227.1034m/z	227.103	5.54402	Prolyl-Hydroxyproline	C10H16N2O4	49.1	-1.60223	RPLC-NEG
HMDB0033071	9.95_239.0592m/z	239.059	9.9489	Propyl 1-(propylsulfinyl)propyl disulfide	C9H20OS3	49.1	-4.61615	RPLC-NEG
HMDB0125100	5.24_608.1578m/z	608.158	5.24487	[(6-{[5,7-dihydroxy-2-(4-oxocyclohexa-2,5-dien-1-ylidene)-2H-chromen-3-yl]oxy}-3,4,5-trihydroxyoxan-2-yl)methyl][1-hydroxy-3-(4-hydroxy-3-methoxyphenyl)prop-2-en-1-ylidene]oxidanium	C31H29O13+	49.1	7.0225	RPLC-NEG
3376	2.35_242.0782m/z	242.078	2.34622	Cytidine	C9H13N3O5	49.2	-0.239464	RPLC-NEG
HMDB0000536	4.95_462.0652m/z	462.065	4.95105	Adenylsuccinic acid	C14H18N5O11P	49.2	-3.47087	RPLC-NEG
HMDB0000953	5.54_230.1030m/z	230.103	5.54402	Suberylglycine	C10H17NO5	49.2	-1.82918	RPLC-NEG
HMDB0011517	11.63_500.2778m/z	500.278	11.6268	LysoPE(20:4(5Z,8Z,11Z,14Z)/0:0)	C25H44NO7P	49.2	-0.877814	RPLC-NEG
HMDB0028809	1.59_308.1243m/z	308.124	1.58842	Glutaminyltyrosine	C14H19N3O5	49.2	-2.8552	RPLC-NEG
HMDB0032112	15.70_315.2895m/z	315.289	15.7024	1,2,4-Nonadecanetriol	C19H40O3	49.2	-3.1812	RPLC-NEG
HMDB0036334	8.92_426.1440m/z	426.144	8.9178	(S)-2-Hydroxy-2-phenylacetonitrile O-[b-D-apiosyl-(1->2)-b-D-glucoside]	C19H25NO10	49.2	8.0813	RPLC-NEG
HMDB0112341	13.14_830.5912m/z	830.591	13.136	PS(15:0/24:1(15Z))	C45H86NO10P	49.2	-0.536059	RPLC-NEG
HMDB0033987	0.90_429.1240m/z	429.124	0.902467	Ononin	C22H22O9	49.3	11.3694	RPLC-NEG
HMDB0036855	9.27_399.2013m/z	399.201	9.27478	Cincassiol B	C20H32O8	49.3	-2.75045	RPLC-NEG
HMDB0038149	8.32_345.1544m/z	345.154	8.315	Nepetaside	C16H26O8	49.3	-3.08724	RPLC-NEG
HMDB0041208	1.68_360.1282m/z	360.128	1.68475	De-O-methylsimmondsin	C15H23NO9	49.3	-5.05865	RPLC-NEG
HMDB0011526	11.58_524.2782m/z	524.278	11.5828	LysoPE(22:6(4Z,7Z,10Z,13Z,16Z,19Z)/0:0)	C27H44NO7P	49.4	-0.0301436	RPLC-NEG
HMDB0028804	5.13_292.1300m/z	292.13	5.12853	Glutaminylphenylalanine	C14H19N3O4	49.4	-0.87631	RPLC-NEG
HMDB0001067	5.13_303.0824m/z	303.082	5.12853	N-Acetylaspartylglutamic acid	C11H16N2O8	49.5	-3.13266	RPLC-NEG
HMDB0002327	9.90_243.1598m/z	243.16	9.8989	1,11-Undecanedicarboxylic acid	C13H24O4	49.5	-1.60228	RPLC-NEG
HMDB0002331	5.15_257.0777m/z	257.078	5.14503	Imidazoleacetic acid riboside	C10H14N2O6	49.5	-0.931148	RPLC-NEG
HMDB0012490	6.25_176.0712m/z	176.071	6.24647	1,2-Dehydrosalsolinol	C10H11NO2	49.5	-2.87602	RPLC-NEG
HMDB0062176	6.80_202.1086m/z	202.109	6.79727	N-lactoyl-Leucine	C9H17NO4	49.5	0.648985	RPLC-NEG
36158	9.17_351.2164m/z	351.216	9.17428	15(R)-PGE2	C20H32O5	49.6	-3.58384	RPLC-NEG
HMDB0029282	10.00_282.0764m/z	282.076	9.99823	Avenanthramide 1p	C16H13NO4	49.6	-2.60601	RPLC-NEG
HMDB0030643	0.84_329.0298m/z	329.03	0.840467	Blighinone	C16H10O8	49.6	-1.56068	RPLC-NEG
HMDB0036047	9.15_251.1284m/z	251.128	9.14562	3alpha-Hydroxyoreadone	C14H20O4	49.6	-1.74139	RPLC-NEG
HMDB0040900	11.03_311.2217m/z	311.222	11.0323	(Â±)-(E)-13-Hydroxy-10-oxo-11-octadecenoic acid	C18H32O4	49.6	-3.34933	RPLC-NEG
HMDB0062175	7.44_236.0931m/z	236.093	7.43757	N-lactoyl-Phenylalanine	C12H15NO4	49.6	1.08883	RPLC-NEG
HMDB0000197	7.14_174.0556m/z	174.056	7.13875	Indoleacetic acid	C10H9NO2	49.7	-2.38225	RPLC-NEG
HMDB0001047	0.75_338.9882m/z	338.988	0.746467	D-Fructose 2,6-bisphosphate	C6H14O12P2	49.7	-1.53756	RPLC-NEG
HMDB0032055	3.68_196.0724m/z	196.072	3.67897	N-Acetylhistidine	C8H11N3O3	49.7	-1.78945	RPLC-NEG
HMDB0060126	11.99_427.2841m/z	427.284	11.9868	25-Hydroxyvitamin D3-26,23-lactone	C27H40O4	49.7	-2.88331	RPLC-NEG
HMDB0037840	2.58_292.1393m/z	292.139	2.58453	N-(1-Deoxy-1-fructosyl)leucine	C12H23NO7	49.8	-3.02653	RPLC-NEG
HMDB0127888	6.67_653.1726m/z	653.173	6.6736	6-[(2-{3-[(6-carboxy-3,4,5-trihydroxyoxan-2-yl)oxy]-4-ethylphenyl}-3,5-dihydroxy-3,4-dihydro-2H-1-benzopyran-7-yl)oxy]-3,4,5-trihydroxyoxane-2-carboxylic acid	C29H34O17	49.8	0.368205	RPLC-NEG
HMDB0000125	0.92_306.0761m/z	306.076	0.917467	Glutathione	C10H17N3O6S	49.9	-1.4406	RPLC-NEG
HMDB0011472	11.40_438.2612m/z	438.261	11.4002	LysoPE(0:0/15:0)	C20H42NO7P	49.9	-3.27977	RPLC-NEG
HMDB0011482	13.54_506.3239m/z	506.324	13.5373	LysoPE(0:0/20:1(11Z))	C25H50NO7P	49.9	-2.53613	RPLC-NEG
HMDB0059994	7.23_230.0125m/z	230.012	7.23407	Benzeneacetamide-4-O-sulphate	C8H9NO5S	49.9	-1.75875	RPLC-NEG
HMDB0133086	12.09_277.1441m/z	277.144	12.0893	2-[5-(3,3-dimethyloxiran-2-yl)-3-methylpent-2-en-1-yl]benzene-1,3,5-triol	C16H22O4	49.9	-1.45453	RPLC-NEG
435	8.30_649.7824m/z	649.782	8.29702	Triiodothyronine	C15H12I3NO4	50	-0.562321	RPLC-NEG
HMDB0034885	7.59_273.1240m/z	273.124	7.59055	Imazamethabenz	C15H18N2O3	50	-1.72584	RPLC-NEG
HMDB0041646	9.61_230.9965m/z	230.996	9.61193	2,4-Dihydroxyacetophenone 5-sulfate	C8H8O6S	50	-1.66161	RPLC-NEG
HMDB0061679	6.97_182.0819m/z	182.082	6.97127	3,4,5,6-Tetrahydrohippuric acid	C9H13NO3	50	-1.88691	RPLC-NEG
2203	3.42_166.0508m/z	166.051	3.41648	Pyridoxal (Vitamin B6)	C8H9NO3	50.2	-1.02768	RPLC-NEG
HMDB0000538	5.06_505.9877m/z	505.988	5.0627	Adenosine triphosphate	C10H16N5O13P3	50.2	-1.58757	RPLC-NEG
HMDB0000939	5.23_383.1139m/z	383.114	5.22803	S-Adenosylhomocysteine	C14H20N6O5S	50.3	-1.09197	RPLC-NEG
HMDB0034195	5.26_711.3227m/z	711.323	5.26153	Convalloside	C35H52O15	50.3	-0.950072	RPLC-NEG
HMDB0011671	4.98_620.0199m/z	620.02	4.98038	ADP-ribose 1"-2" cyclic phosphate	C15H22N5O16P3	50.4	-0.472994	RPLC-NEG
HMDB0033903	2.60_150.0560m/z	150.056	2.5992	3alpha,4,7,7alpha-Tetrahydro-1H-isoindole-1,3(2H)-dione	C8H9NO2	50.4	-0.591966	RPLC-NEG
HMDB0041541	0.96_335.1539m/z	335.154	0.962133	N2-Fructopyranosylarginine	C12H24N4O7	50.4	-9.87595	RPLC-NEG
HMDB0041551	9.87_295.1541m/z	295.154	9.86575	3,8-Dihydroxy-6-methoxy-7(11)-eremophilen-12,8-olide	C16H24O5	50.4	-3.29978	RPLC-NEG
44108	7.80_334.0533m/z	334.053	7.80353	ISOXICAM	C14H13N3O5S	50.5	8.79216	RPLC-NEG
HMDB0000089	0.86_242.0794m/z	242.079	0.8568	Cytidine	C9H13N3O5	50.5	4.86825	RPLC-NEG
HMDB0000472	5.54_219.0771m/z	219.077	5.54402	5-Hydroxy-L-tryptophan	C11H12N2O3	50.5	-1.6631	RPLC-NEG
HMDB0000085	5.33_266.0896m/z	266.09	5.32852	Deoxyguanosine	C10H13N5O4	50.6	0.363544	RPLC-NEG
HMDB0001545	2.75_166.0507m/z	166.051	2.74585	Pyridoxal	C8H9NO3	50.6	-1.40782	RPLC-NEG
HMDB0029106	6.57_293.1131m/z	293.113	6.56978	Tyrosyl-Hydroxyproline	C14H18N2O5	50.6	-4.09746	RPLC-NEG
HMDB0030529	11.67_602.3455m/z	602.346	11.6705	Janthitrem E	C37H49NO6	50.6	-5.24048	RPLC-NEG
HMDB0038489	0.89_341.1079m/z	341.108	0.8873	Allolactose	C12H22O11	50.6	-3.10434	RPLC-NEG
HMDB0030669	0.87_367.1052m/z	367.105	0.872133	3-O-Feruloylquinic acid	C17H20O9	50.7	4.83549	RPLC-NEG
96431	5.08_622.3682m/z	622.368	5.07987	Apicidin	C34H49N5O6	50.8	11.5909	RPLC-NEG
HMDB0000329	10.01_163.0762m/z	163.076	10.0147	2-Phenylbutyric acid	C10H12O2	50.8	-1.43123	RPLC-NEG
HMDB0029028	5.67_300.1344m/z	300.134	5.66967	Prolyl-Tryptophan	C16H19N3O3	50.8	-3.17549	RPLC-NEG
HMDB0029050	5.41_290.1127m/z	290.113	5.40852	Seryltryptophan	C14H17N3O4	50.8	-6.58653	RPLC-NEG
HMDB0035918	11.02_271.1907m/z	271.191	11.0165	7(14)-Bisabolene-2,3,10,11-tetrol	C15H28O4	50.8	-2.83898	RPLC-NEG
HMDB0029042	2.13_217.1189m/z	217.119	2.12522	Serylisoleucine	C9H18N2O4	50.9	-2.14783	RPLC-NEG
HMDB0001487	6.76_664.1175m/z	664.117	6.7636	NADH	C21H29N7O14P2	51	-0.0213754	RPLC-NEG
HMDB0028917	1.59_231.1346m/z	231.135	1.58842	Isoleucyl-Threonine	C10H20N2O4	51	-1.93089	RPLC-NEG
HMDB0011152	12.37_436.2827m/z	436.283	12.3733	PE(P-16:0e/0:0)	C21H44NO6P	51.1	-1.49076	RPLC-NEG
HMDB0028742	5.44_317.1248m/z	317.125	5.44235	Asparaginyl-Tryptophan	C15H18N4O4	51.1	-2.35893	RPLC-NEG
HMDB0037265	6.06_386.1135m/z	386.114	6.05798	HDMBOA-Glc	C16H21NO10	51.1	10.9462	RPLC-NEG
HMDB0031665	1.89_203.0183m/z	203.018	1.8869	Daucic acid	C7H8O7	51.2	-6.95132	RPLC-NEG
239561	5.99_449.2031m/z	449.203	5.98782	Val Ala Phe Asp	C21H30N4O7	51.3	-2.33729	RPLC-NEG
HMDB0000034	0.98_134.0469m/z	134.047	0.977467	Adenine	C5H5N5	51.3	-2.31821	RPLC-NEG
HMDB0002183	14.55_327.2323m/z	327.232	14.5459	Docosahexaenoic acid	C22H32O2	51.3	-2.04252	RPLC-NEG
HMDB0062357	12.52_307.1903m/z	307.19	12.5219	(6E,8E,10R,12Z)-10-Hydroxy-3-oxooctadecatrienoic acid	C18H28O4	51.3	-3.84017	RPLC-NEG
HMDB0000594	5.67_293.1125m/z	293.113	5.66967	gamma-Glutamylphenylalanine	C14H18N2O5	51.4	-6.01025	RPLC-NEG
HMDB0001235	2.38_294.0461m/z	294.046	2.37738	5-Aminoimidazole ribonucleotide	C8H14N3O7P	51.4	-11.9468	RPLC-NEG
HMDB0028990	4.81_278.1139m/z	278.114	4.80688	Phenylalanyl-Asparagine	C13H17N3O4	51.4	-2.43491	RPLC-NEG
HMDB0030396	5.56_203.0831m/z	203.083	5.55852	(Â±)-Tryptophan	C11H12N2O2	51.4	2.23269	RPLC-NEG
HMDB0031668	9.58_221.0817m/z	221.082	9.57727	Dihydrodeoxy-8-epiaustdiol	C12H14O4	51.5	-0.835342	RPLC-NEG
HMDB0039516	9.78_265.1434m/z	265.143	9.78058	4'-Dihydroabscisic acid	C15H22O4	51.5	-4.3943	RPLC-NEG
HMDB0000292	3.03_151.0264m/z	151.026	3.02567	Xanthine	C5H4N4O2	51.6	1.35265	RPLC-NEG
HMDB0038338	7.45_218.0820m/z	218.082	7.45407	alpha-Hydroxy-1-methyl-1H-indole-3-propanoic acid	C12H13NO3	51.6	-1.40409	RPLC-NEG
HMDB0039421	2.56_662.1022m/z	662.102	2.55537	Fenugreekine	C21H27N7O14P2	51.6	0.567826	RPLC-NEG
HMDB0003423	0.86_145.0618m/z	145.062	0.8568	D-Glutamine	C5H10N2O3	51.7	-0.179295	RPLC-NEG
HMDB0028852	5.51_260.1037m/z	260.104	5.50985	Glycyl-Tryptophan	C13H15N3O3	51.7	-1.41254	RPLC-NEG
HMDB0037846	5.24_326.1236m/z	326.124	5.24487	N-(1-Deoxy-1-fructosyl)phenylalanine	C15H21NO7	51.7	-2.96554	RPLC-NEG
HMDB0000585	5.31_485.1986m/z	485.199	5.31153	Glucosylgalactosyl hydroxylysine	C18H34N2O13	51.8	-0.476708	RPLC-NEG
HMDB0003357	1.40_173.0931m/z	173.093	1.40177	N-Acetylornithine	C7H14N2O3	51.8	-0.59382	RPLC-NEG
HMDB0030327	8.67_263.0821m/z	263.082	8.66865	Perlolyrine	C16H12N2O2	51.8	-1.99694	RPLC-NEG
HMDB0033915	8.80_311.0556m/z	311.056	8.79615	Aloe emodin w-acetate	C17H12O6	51.8	-1.51002	RPLC-NEG
HMDB0038088	2.29_608.1597m/z	608.16	2.28622	3-Ferulylpelargonidin 5-glucoside	C31H29O13+	51.9	10.1755	RPLC-NEG
HMDB0040515	9.66_300.0869m/z	300.087	9.6636	gamma-Glutamyl-beta-(isoxazolin-5-on-2-yl)alanine	C11H15N3O7	51.9	10.6952	RPLC-NEG
3595	5.03_558.0636m/z	558.064	5.02922	ADP-ribose	C15H23N5O14P2	52	-1.40436	RPLC-NEG
HMDB0001886	3.66_165.0405m/z	165.041	3.66363	3-Methylxanthine	C6H6N4O2	52	-7.74608	RPLC-NEG
HMDB0002995	12.93_337.2374m/z	337.237	12.9267	12-Keto-tetrahydro-leukotriene B4	C20H34O4	52	-3.18797	RPLC-NEG
264319	5.73_484.2773m/z	484.277	5.73433	Val Leu Ser Pro Ala	C22H39N5O7	52.1	-0.850715	RPLC-NEG
264588	6.01_444.2451m/z	444.245	6.00548	Ala Gly Leu Val Ser	C19H35N5O7	52.1	-2.8351	RPLC-NEG
HMDB0000286	0.84_565.0491m/z	565.049	0.840467	Uridine diphosphate glucose	C15H24N2O17P2	52.1	2.33175	RPLC-NEG
HMDB0013940	4.73_251.1031m/z	251.103	4.73307	3'-Hydroxyhexobarbital	C12H16N2O4	52.1	-2.67035	RPLC-NEG
HMDB0033486	5.95_286.1078m/z	286.108	5.95348	Pipermethystine	C16H17NO4	52.1	-2.25454	RPLC-NEG
HMDB0061022	3.01_407.1920m/z	407.192	3.01067	6-beta-hydroxydexamethasone	C22H29FO6	52.1	10.9357	RPLC-NEG
HMDB0000017	5.11_182.0456m/z	182.046	5.11353	4-Pyridoxic acid	C8H9NO4	52.2	-1.58945	RPLC-NEG
HMDB0000210	2.47_218.1036m/z	218.104	2.46587	Pantothenic acid	C9H17NO5	52.2	1.09568	RPLC-NEG
HMDB0034688	10.07_289.0867m/z	289.087	10.0651	2,3-Dihydro-2,3-dihydroxy-9-phenyl-1H-phenalen-1-one	C19H14O3	52.2	-1.1689	RPLC-NEG
HMDB0059645	6.06_334.0553m/z	334.055	6.05798	beta-nicotinamide D-ribonucleotide	C11H16N2O8P+	52.2	-5.56733	RPLC-NEG
HMDB0001190	6.78_158.0608m/z	158.061	6.7806	Indoleacetaldehyde	C10H9NO	52.3	-2.29261	RPLC-NEG
HMDB0004810	8.97_271.0994m/z	271.099	8.97063	5C-aglycone	C16H16O4	52.3	6.82408	RPLC-NEG
HMDB0014118	1.50_112.9854m/z	112.985	1.50493	Trifluoroacetic acid	C2HF3O2	52.3	-1.41137	RPLC-NEG
HMDB0029074	1.59_217.1189m/z	217.119	1.58842	Threoninyl-Valine	C9H18N2O4	52.3	-2.11716	RPLC-NEG
HMDB0039469	13.20_347.1700m/z	347.17	13.196	(1S,2S,4R)-p-Menth-8-ene-1,2,10-triol 2-glucoside	C16H28O8	52.3	-3.21346	RPLC-NEG
HMDB0132255	14.81_353.0480m/z	353.048	14.8133	3,4,5-trihydroxy-6-[(7-hydroxy-2-oxo-2H-chromen-6-yl)oxy]oxane-2-carboxylic acid	C15H14O10	52.3	-9.78445	RPLC-NEG
HMDB0000191	0.77_132.0303m/z	132.03	0.767633	L-Aspartic acid	C4H7NO4	52.4	0.201264	RPLC-NEG
HMDB0010727	10.23_213.1491m/z	213.149	10.2265	3-Oxododecanoic acid	C12H22O3	52.4	-2.3005	RPLC-NEG
HMDB0033108	5.59_365.1344m/z	365.134	5.58767	Semilepidinoside B	C17H22N2O7	52.4	-2.74249	RPLC-NEG
HMDB0029068	5.24_265.1189m/z	265.119	5.24487	Threoninyl-Phenylalanine	C13H18N2O4	52.5	-1.85239	RPLC-NEG
HMDB0061643	8.95_267.1234m/z	267.123	8.95313	3-carboxy-4-methyl-5-pentyl-2-furanpropanoic acid	C14H20O5	52.5	-1.52633	RPLC-NEG
44309	6.11_340.2234m/z	340.223	6.10582	DIPROTIN A	C17H31N3O4	52.6	-2.17796	RPLC-NEG
HMDB0002040	8.02_177.0555m/z	177.056	8.02468	4-Methoxycinnamic acid	C10H10O3	52.6	-0.975836	RPLC-NEG
HMDB0030619	10.26_337.0683m/z	337.068	10.26	Ovalitenone	C19H14O6	52.6	-10.148	RPLC-NEG
85183	5.28_296.0993m/z	296.099	5.27803	Nelarabine	C11H15N5O5	52.7	-2.39756	RPLC-NEG
HMDB0034777	6.43_260.1131m/z	260.113	6.43213	Epidermin	C11H19NO6	52.7	-3.41944	RPLC-NEG
HMDB0000755	2.44_181.0502m/z	181.05	2.43653	Hydroxyphenyllactic acid	C9H10O4	52.8	-2.57938	RPLC-NEG
HMDB0001200	5.54_235.0719m/z	235.072	5.54402	N'-Formylkynurenine	C11H12N2O4	52.8	-2.23285	RPLC-NEG
HMDB0011173	0.95_187.0720m/z	187.072	0.9473	L-glycyl-L-hydroxyproline	C7H12N2O4	52.8	-2.10506	RPLC-NEG
HMDB0029394	5.54_392.1125m/z	392.112	5.54402	gamma-L-Glutamyl-S-(2-carboxy-1-propyl)cysteinylglycine	C14H23N3O8S	52.8	-2.17507	RPLC-NEG
HMDB0035178	3.39_168.0666m/z	168.067	3.38648	6-Acetyl-2,3-dihydro-2-(hydroxymethyl)-4(1H)-pyridinone	C8H11NO3	52.8	0.0319074	RPLC-NEG
HMDB0130027	2.45_293.0509m/z	293.051	2.4512	6-(1-carboxy-2-methoxy-2-oxoethyl)-3,4,5-trihydroxyoxane-2-carboxylic acid	C10H14O10	52.9	-1.92986	RPLC-NEG
HMDB0001341	4.95_426.0211m/z	426.021	4.95105	ADP	C10H15N5O10P2	53.1	-2.39309	RPLC-NEG
HMDB0112083	13.14_237.1479m/z	237.148	13.136	3,4-Dimethyl-5-pentyl-2-furanpropanoic acid	C14H22O3	53.2	-7.06544	RPLC-NEG
HMDB0002059	10.21_215.1650m/z	215.165	10.2101	12-Hydroxydodecanoic acid	C12H24O3	53.3	-1.17894	RPLC-NEG
HMDB0031173	5.03_189.0665m/z	189.066	5.02922	6-Hydroxy-1H-indole-3-acetamide	C10H10N2O2	53.3	-2.51459	RPLC-NEG
HMDB0032399	7.79_151.0399m/z	151.04	7.78603	Methyl furfuracrylate	C8H8O3	53.3	-1.20134	RPLC-NEG
HMDB0037844	0.98_278.1238m/z	278.124	0.977467	N-(1-Deoxy-1-fructosyl)valine	C11H21NO7	53.3	-2.68513	RPLC-NEG
HMDB0041561	1.76_161.0456m/z	161.046	1.76308	D-1,5-Anhydrofructose	C6H10O5	53.3	0.225631	RPLC-NEG
HMDB0059708	8.94_201.1129m/z	201.113	8.9353	2-Ethylsuberic acid	C10H18O4	53.3	-1.8806	RPLC-NEG
HMDB0000486	7.99_159.1024m/z	159.102	7.9882	7-Hydroxyoctanoic acid	C8H16O3	53.4	-1.70169	RPLC-NEG
HMDB0000177	0.93_154.0621m/z	154.062	0.932467	L-Histidine	C6H9N3O2	53.5	-0.723884	RPLC-NEG
HMDB0029417	5.51_176.0385m/z	176.038	5.50985	Cycloalliin	C6H11NO3S	53.5	-1.29323	RPLC-NEG
HMDB0033066	7.30_343.1388m/z	343.139	7.30023	(-)-erythro-Anethole glycol 1-glucoside	C16H24O8	53.5	-3.09785	RPLC-NEG
HMDB0059760	7.54_187.0971m/z	187.097	7.53805	2,4-Dimethylpimelic acid	C9H16O4	53.5	-2.72785	RPLC-NEG
HMDB0000567	3.01_147.0452m/z	147.045	3.01067	Cinnamic acid	C9H8O2	53.6	0.102654	RPLC-NEG
HMDB0029817	8.72_165.0555m/z	165.056	8.72398	Ethyl salicylate	C9H10O3	53.6	-1.19513	RPLC-NEG
44901	10.07_253.1443m/z	253.144	10.0651	C75	C14H22O4	53.7	-0.784907	RPLC-NEG
HMDB0000159	3.03_164.0721m/z	164.072	3.02567	L-Phenylalanine	C9H11NO2	53.7	2.25149	RPLC-NEG
HMDB0094729	7.06_184.0975m/z	184.098	7.06392	3-Hepteneoylglycine	C9H15NO3	53.7	-2.2363	RPLC-NEG
HMDB0000516	0.87_179.0558m/z	179.056	0.872133	Beta-D-Glucose	C6H12O6	53.8	-1.45929	RPLC-NEG
HMDB0006045	6.69_359.1291m/z	359.129	6.68827	Dityrosine	C18H20N2O6	53.8	11.7101	RPLC-NEG
HMDB0011745	2.61_190.0537m/z	190.054	2.61387	N-Acetyl-L-methionine	C7H13NO3S	53.8	-3.248	RPLC-NEG
HMDB0028848	5.13_221.0930m/z	221.093	5.12853	Glycyl-Phenylalanine	C11H14N2O3	53.8	-0.948469	RPLC-NEG
HMDB0030987	9.88_241.1439m/z	241.144	9.88225	2-Carboxy-4-dodecanolide	C13H22O4	53.8	-2.58896	RPLC-NEG
HMDB0034782	9.29_187.0067m/z	187.007	9.28928	Benzyl sulfate	C7H8O4S	53.8	-1.81193	RPLC-NEG
HMDB0001324	5.36_191.0825m/z	191.082	5.35835	N'-Hydroxymethylnorcotinine	C10H12N2O2	53.9	-0.595001	RPLC-NEG
HMDB0062560	2.47_321.0482m/z	321.048	2.46587	thymidine 3'-monophosphate	C10H15N2O8P	53.9	-3.45927	RPLC-NEG
HMDB0000245	5.11_225.0875m/z	225.087	5.11353	Porphobilinogen	C10H14N2O4	54	-2.70082	RPLC-NEG
HMDB0003337	2.02_611.1461m/z	611.146	2.02373	Oxidized glutathione	C20H32N6O12S2	54	2.25635	RPLC-NEG
64775	8.44_462.1905m/z	462.19	8.44	4-hydroxy Nonenal Glutathione	C19H33N3O8S	54.2	-2.33838	RPLC-NEG
HMDB0030417	0.75_216.0514m/z	216.051	0.746467	Lycoperdic acid	C8H11NO6	54.2	0.30443	RPLC-NEG
HMDB0031518	0.77_133.0146m/z	133.015	0.767633	D-Malic acid	C4H6O5	54.2	2.2921	RPLC-NEG
HMDB0060015	6.69_172.9910m/z	172.991	6.68827	Phenol sulphate	C6H6O4S	54.2	-2.18302	RPLC-NEG
HMDB0011627	10.24_324.1991m/z	324.199	10.2434	Farnesylcysteine	C18H31NO2S	54.3	-3.64481	RPLC-NEG
HMDB0000671	6.85_204.0662m/z	204.066	6.8466	Indolelactic acid	C11H11NO3	54.4	-2.18395	RPLC-NEG
HMDB0000132	4.91_150.0418m/z	150.042	4.90788	Guanine	C5H5N5O	54.5	-2.19352	RPLC-NEG
HMDB0029064	2.91_231.1348m/z	231.135	2.90683	Threoninyl-Isoleucine	C10H20N2O4	54.5	-0.936296	RPLC-NEG
HMDB0029423	0.96_160.0612m/z	160.061	0.962133	Acetylhomoserine	C6H11NO4	54.5	-1.90246	RPLC-NEG
HMDB0011478	10.83_474.2612m/z	474.261	10.8293	LysoPE(0:0/18:3(6Z,9Z,12Z))	C23H42NO7P	54.6	-2.95712	RPLC-NEG
HMDB0011716	2.69_252.0871m/z	252.087	2.68718	N-Acetylvanilalanine	C12H15NO5	54.6	-2.46773	RPLC-NEG
HMDB0029108	6.51_293.1484m/z	293.148	6.51078	Tyrosyl-Isoleucine	C15H22N2O4	54.6	-7.72451	RPLC-NEG
HMDB0006248	0.96_217.0829m/z	217.083	0.962133	gamma-Glutamylalanine	C8H14N2O5	54.8	-0.496256	RPLC-NEG
HMDB0011171	5.28_259.1293m/z	259.129	5.27803	gamma-Glutamylleucine	C11H20N2O5	54.8	-2.62237	RPLC-NEG
HMDB0011756	6.14_172.0975m/z	172.098	6.1403	N-Acetylleucine	C8H15NO3	54.8	-2.21147	RPLC-NEG
HMDB0029414	1.73_198.0385m/z	198.039	1.73175	(S)-alpha-Amino-4-carboxy-3-furanpropanoic acid	C8H9NO5	54.8	-11.4442	RPLC-NEG
HMDB0000623	9.07_229.1429m/z	229.143	9.0728	Dodecanedioic acid	C12H22O4	54.9	-6.98094	RPLC-NEG
HMDB0000719	0.86_118.0508m/z	118.051	0.8568	L-Homoserine	C4H9NO3	54.9	-1.42801	RPLC-NEG
HMDB0059660	0.86_214.0483m/z	214.048	0.8568	sn-glycero-3-Phosphoethanolamine	C5H14NO6P	54.9	-1.29417	RPLC-NEG
43994	9.43_183.0043m/z	183.004	9.43293	2,4-DINITROPHENOL	C6H4N2O5	55	-2.47023	RPLC-NEG
HMDB0011485	12.33_502.2925m/z	502.293	12.3293	LysoPE(0:0/20:3(5Z,8Z,11Z))	C25H46NO7P	55	-2.797	RPLC-NEG
HMDB0029576	0.96_133.0504m/z	133.05	0.962133	2,3-Dihydroxy-2-methylbutanoic acid	C5H10O4	55	-1.86325	RPLC-NEG
HMDB0112184	12.90_271.2271m/z	271.227	12.8967	5-Hydroxyhexadecanoic acid	C16H32O3	55	-2.69459	RPLC-NEG
HMDB0133463	9.83_193.0867m/z	193.087	9.83142	4-(3-hydroxybut-1-en-1-yl)-2-methoxyphenol	C11H14O3	55	-1.49233	RPLC-NEG
64742	7.47_241.0732m/z	241.073	7.46923	Lumichrome	C12H10N4O2	55.1	0.232025	RPLC-NEG
HMDB0011134	12.85_319.2269m/z	319.227	12.8517	5-HETE	C20H32O3	55.1	-2.87695	RPLC-NEG
HMDB0000158	1.68_180.0669m/z	180.067	1.68475	L-Tyrosine	C9H11NO3	55.2	1.71951	RPLC-NEG
HMDB0000714	2.58_178.0505m/z	178.051	2.58453	Hippuric acid	C9H9NO3	55.3	-2.38994	RPLC-NEG
HMDB0011473	11.35_452.2761m/z	452.276	11.3535	LysoPE(0:0/16:0)	C21H44NO7P	55.3	-4.71903	RPLC-NEG
HMDB0038047	10.92_207.1386m/z	207.139	10.9212	Carvyl propionate	C13H20O2	55.3	-2.28162	RPLC-NEG
HMDB0094716	1.25_160.0612m/z	160.061	1.25045	hydroxybutyrylglycine	C6H11NO4	55.3	-1.99277	RPLC-NEG
HMDB0001508	0.99_410.0254m/z	410.025	0.994133	dADP	C10H15N5O9P2	55.4	-4.40517	RPLC-NEG
HMDB0002149	14.43_161.0238m/z	161.024	14.4271	3 Hydroxycoumarin	C9H6O3	55.5	-3.81354	RPLC-NEG
HMDB0011479	11.94_474.2592m/z	474.259	11.9435	LysoPE(0:0/18:3(9Z,12Z,15Z))	C23H42NO7P	55.5	-7.1792	RPLC-NEG
HMDB0035665	5.97_215.0829m/z	215.083	5.97032	L-1,2,3,4-Tetrahydro-beta-carboline-3-carboxylic acid	C12H12N2O2	55.5	1.52761	RPLC-NEG
3451	4.92_321.0485m/z	321.048	4.92222	dTMP	C10H15N2O8P	55.6	-2.69339	RPLC-NEG
HMDB0028952	1.59_258.1458m/z	258.146	1.58842	Lysyl-Hydroxyproline	C11H21N3O4	55.6	-0.363417	RPLC-NEG
HMDB0029723	3.06_181.9915m/z	181.992	3.05567	Saccharin	C7H5NO3S	55.6	-1.19382	RPLC-NEG
HMDB0032574	9.56_179.0708m/z	179.071	9.55993	Propylparaben	C10H12O3	55.7	-3.27117	RPLC-NEG
HMDB0000148	0.77_146.0459m/z	146.046	0.767633	L-Glutamic acid	C5H9NO4	55.8	0.40978	RPLC-NEG
HMDB0000682	7.25_212.0020m/z	212.002	7.25023	Indoxyl sulfate	C8H7NO4S	55.8	-1.49731	RPLC-NEG
HMDB0028734	2.63_244.1294m/z	244.129	2.62852	Asparaginyl-Isoleucine	C10H19N3O4	55.8	-3.43784	RPLC-NEG
HMDB0034879	1.22_307.1503m/z	307.15	1.21862	1-[(5-Amino-5-carboxypentyl)amino]-1-deoxyfructose	C12H24N2O7	55.8	-2.49959	RPLC-NEG
HMDB0014844	9.43_407.1653m/z	407.165	9.43293	Tamsulosin	C20H28N2O5S	55.9	1.60042	RPLC-NEG
HMDB0028690	3.82_201.1240m/z	201.124	3.81595	Alanyl-Isoleucine	C9H18N2O3	55.9	-2.38423	RPLC-NEG
HMDB0028738	5.00_278.1137m/z	278.114	4.99688	Asparaginyl-Phenylalanine	C13H17N3O4	55.9	-3.21435	RPLC-NEG
HMDB0000181	2.35_196.0608m/z	196.061	2.34622	L-Dopa	C9H11NO4	56	-3.78424	RPLC-NEG
HMDB0037726	10.72_223.1334m/z	223.133	10.7179	Octyl 2-furoate	C13H20O3	56	-2.44887	RPLC-NEG
HMDB0060013	6.21_203.0024m/z	203.002	6.21147	O-methoxycatechol-O-sulphate	C7H8O5S	56	1.8802	RPLC-NEG
101	0.98_662.1021m/z	662.102	0.977467	Nicotinamide adenine dinucleotide (NAD)	C21H27N7O14P2	56.1	0.439332	RPLC-NEG
HMDB0000101	5.37_250.0936m/z	250.094	5.37418	Deoxyadenosine	C10H13N5O3	56.1	-3.75723	RPLC-NEG
HMDB0000227	2.30_147.0658m/z	147.066	2.30138	Mevalonic acid	C6H12O4	56.1	-3.19465	RPLC-NEG
HMDB0000512	7.02_206.0820m/z	206.082	7.01792	N-Acetyl-L-phenylalanine	C11H13NO3	56.1	-1.09891	RPLC-NEG
HMDB0001397	1.95_362.0492m/z	362.049	1.94773	Guanosine monophosphate	C10H14N5O8P	56.1	-4.21767	RPLC-NEG
HMDB0011170	2.50_259.1292m/z	259.129	2.4962	gamma-Glutamylisoleucine	C11H20N2O5	56.1	-2.69225	RPLC-NEG
HMDB0061704	11.81_599.3196m/z	599.32	11.8143	2-Stearoylglycerophosphoinositol	C27H53O12P	56.1	-1.05582	RPLC-NEG
HMDB0062551	11.68_201.0223m/z	201.022	11.685	4-ethylphenylsulfate	C8H10O4S	56.1	-1.8145	RPLC-NEG
HMDB0010621	17.27_769.5020m/z	769.502	17.2724	PG(18:1(11Z)/18:3(6Z,9Z,12Z))	C42H75O10P	56.2	-0.64696	RPLC-NEG
HMDB0032090	12.91_263.1643m/z	263.164	12.9117	12-Oxo-2,3-dinor-10,15-phytodienoic acid	C16H24O3	56.2	-3.60206	RPLC-NEG
HMDB0000251	0.84_124.0071m/z	124.007	0.840467	Taurine	C2H7NO3S	56.3	-2.5727	RPLC-NEG
HMDB0062291	13.11_351.2164m/z	351.216	13.106	15-oxo-5S,6R-dihydroxy-7E,9E,11Z-eicosatrienoic acid	C20H32O5	56.3	-3.65997	RPLC-NEG
HMDB0112953	14.22_716.5221m/z	716.522	14.2183	PE-NMe(15:0/18:1(9Z))	C39H76NO8P	56.3	-2.02875	RPLC-NEG
HMDB0000289	1.93_167.0210m/z	167.021	1.93257	Uric acid	C5H4N4O3	56.4	-0.602093	RPLC-NEG
HMDB0001173	6.06_296.0821m/z	296.082	6.05798	5'-Methylthioadenosine	C11H15N5O3S	56.4	-0.51624	RPLC-NEG
HMDB0013222	0.95_130.0613m/z	130.061	0.9473	Beta-Guanidinopropionic acid	C4H9N3O2	56.5	-6.74161	RPLC-NEG
3769	0.78_174.0407m/z	174.041	0.783317	N-acetylaspartate	C6H9NO5	56.6	-0.705976	RPLC-NEG
HMDB0000296	1.86_243.0620m/z	243.062	1.85623	Uridine	C9H12N2O6	56.6	-0.899965	RPLC-NEG
HMDB0031346	1.87_190.0717m/z	190.072	1.87173	Calystegine C1	C7H13NO5	56.7	-2.29523	RPLC-NEG
HMDB0112185	14.56_271.2272m/z	271.227	14.5608	7-Hydroxyhexadecanoic acid	C16H32O3	56.7	-2.61738	RPLC-NEG
HMDB0125514	6.19_209.0451m/z	209.045	6.19263	(2E)-3-(2,4-dihydroxy-5-methoxyphenyl)prop-2-enoic acid	C10H10O5	56.7	-2.12709	RPLC-NEG
HMDB0134040	7.66_179.0347m/z	179.035	7.66405	3-(2-hydroxyphenyl)oxirane-2-carboxylic acid	C9H8O4	56.7	-1.46409	RPLC-NEG
HMDB0000734	5.56_186.0554m/z	186.055	5.55852	Indoleacrylic acid	C11H9NO2	56.8	-3.57517	RPLC-NEG
HMDB0009050	14.22_726.5434m/z	726.543	14.2183	PE(18:1(11Z)/P-18:1(11Z))	C41H78NO7P	56.8	-1.22563	RPLC-NEG
HMDB0028803	1.44_276.1019m/z	276.102	1.43643	Glutaminylmethionine	C10H19N3O4S	56.8	-1.66722	RPLC-NEG
HMDB0028901	1.59_286.1875m/z	286.188	1.58842	Isoleucyl-Arginine	C12H25N5O3	56.8	-3.3031	RPLC-NEG
102	5.00_742.0689m/z	742.069	4.99688	Nicotinamide Adenine Dinucleotide Phosphate (NADP+)	C21H28N7O17P3	56.9	0.982948	RPLC-NEG
HMDB0010733	13.11_269.2115m/z	269.212	13.106	3-Oxohexadecanoic acid	C16H30O3	56.9	-2.60975	RPLC-NEG
HMDB0029365	7.09_312.1268m/z	312.127	7.09358	Moupinamide	C18H19NO4	56.9	8.4464	RPLC-NEG
HMDB0059752	5.29_204.9814m/z	204.981	5.2947	5-Sulfoxymethylfurfural	C6H6O6S	56.9	0.905288	RPLC-NEG
HMDB0000001	1.59_168.0775m/z	168.078	1.58842	1-Methylhistidine	C7H11N3O2	57	-1.88955	RPLC-NEG
HMDB0094710	9.93_245.0121m/z	245.012	9.9324	3-[3-(Sulfooxy)phenyl]propanoic acid	C9H10O6S	57	-1.68825	RPLC-NEG
HMDB0000134	0.77_115.0036m/z	115.004	0.767633	Fumaric acid	C4H4O4	57.2	-1.09824	RPLC-NEG
HMDB0000254	0.82_117.0191m/z	117.019	0.8188	Succinic acid	C4H6O4	57.2	-1.62839	RPLC-NEG
HMDB0000301	0.95_137.0352m/z	137.035	0.9473	Urocanic acid	C6H6N2O2	57.2	-2.96204	RPLC-NEG
HMDB0008959	14.22_714.5073m/z	714.507	14.2183	PE(16:1(9Z)/18:1(11Z))	C39H74NO8P	57.2	-0.888391	RPLC-NEG
HMDB0062178	5.59_275.1038m/z	275.104	5.58767	N-lactoyl-Tryptophan	C14H16N2O4	57.2	0.237807	RPLC-NEG
HMDB0000766	1.35_130.0506m/z	130.051	1.35177	N-Acetyl-L-alanine	C5H9NO3	57.3	-2.51087	RPLC-NEG
HMDB0010730	11.99_241.1806m/z	241.181	11.9868	3-Oxotetradecanoic acid	C14H26O3	57.4	-1.13553	RPLC-NEG
4100	2.79_138.0195m/z	138.02	2.79002	4-Nitrophenol	C6H5NO3	57.5	-1.15912	RPLC-NEG
HMDB0062181	2.85_188.0925m/z	188.093	2.84835	N-lactoyl-Valine	C8H15NO4	57.5	-1.6596	RPLC-NEG
HMDB0000321	0.89_161.0454m/z	161.045	0.8873	2-Hydroxyadipic acid	C6H10O5	57.6	-1.12135	RPLC-NEG
HMDB0000735	7.03_208.0613m/z	208.061	7.03275	Hydroxyphenylacetylglycine	C10H11NO4	57.6	-1.30151	RPLC-NEG
HMDB0001870	6.48_121.0291m/z	121.029	6.48112	Benzoic acid	C7H6O2	57.6	-3.43693	RPLC-NEG
HMDB0006294	13.89_271.2271m/z	271.227	13.8917	16-Hydroxy hexadecanoic acid	C16H32O3	57.6	-2.84338	RPLC-NEG
HMDB0000175	1.98_347.0412m/z	347.041	1.97823	Inosinic acid	C10H13N4O8P	57.7	3.99802	RPLC-NEG
HMDB0012839	10.85_335.2216m/z	335.222	10.845	6,7-dihydro-5-oxo-12-epi-LTB4	C20H32O4	57.7	-3.47684	RPLC-NEG
HMDB0041683	8.37_165.0555m/z	165.055	8.3665	4-Hydroxyphenyl-2-propionic acid	C9H10O3	57.9	-1.47642	RPLC-NEG
HMDB0000206	3.95_187.1084m/z	187.108	3.95212	N6-Acetyl-L-lysine	C8H16N2O3	58.1	-1.99556	RPLC-NEG
HMDB0000387	11.16_215.1651m/z	215.165	11.1562	3-Hydroxydodecanoic acid	C12H24O3	58.1	-0.787872	RPLC-NEG
HMDB0013209	5.54_274.1195m/z	274.12	5.54402	Alanyltryptophan	C14H17N3O3	58.5	-0.674675	RPLC-NEG
HMDB0033601	9.45_211.1337m/z	211.134	9.44877	Dihydrojasmonic acid	C12H20O3	58.8	-1.1755	RPLC-NEG
HMDB0006552	8.80_311.0556m/z	311.056	8.8	AflatoxinB1	C17H12O6	54.7	-1.5	RPLC-NEG

## Sheet: HILIC_POS
Table S2. Identified 825 metabolites from all samples by HILIC-POS analysis mode
Metabolite ID	Metabolic feature	m/z	Retention time (min)	Metabolite name	Formula	Score	Mass Error (ppm)	Mode
HMDB0113927	1.15_756.5527m/z	756.553	1.15355	PE-NMe2(15:0/20:3(8Z,11Z,14Z))	C42H78NO8P	39.7	-1.37142	HILIC-POS
22173	6.70_391.2325m/z	391.233	6.69555	Phe Pro Lys	C20H30N4O4	40	-3.77882	HILIC-POS
255527	9.31_496.2382m/z	496.238	9.31138	Tyr Ala Asp Lys	C22H33N5O8	40	-3.98988	HILIC-POS
HMDB0008909	1.15_758.5686m/z	758.569	1.15355	PE(15:0/22:2(13Z,16Z))	C42H80NO8P	40	-1.10447	HILIC-POS
HMDB0036425	0.75_385.2732m/z	385.273	0.750417	Persicachrome	C25H36O3	40	-1.30247	HILIC-POS
HMDB0008450	0.85_856.5821m/z	856.582	0.845583	PC(20:4(5Z,8Z,11Z,14Z)/22:5(4Z,7Z,10Z,13Z,16Z))	C50H82NO8P	40.1	-3.5254	HILIC-POS
HMDB0060436	10.12_260.0520m/z	260.052	10.1202	Aminofructose 6-phosphate	C6H14NO8P	40.1	-3.5958	HILIC-POS
HMDB0001227	8.53_323.0622m/z	323.062	8.52843	5-Thymidylic acid	C10H15N2O8P	40.2	-5.29419	HILIC-POS
HMDB0008090	0.85_832.5843m/z	832.584	0.845583	PC(18:1(11Z)/22:6(4Z,7Z,10Z,13Z,16Z,19Z))	C48H82NO8P	40.2	-0.890072	HILIC-POS
HMDB0135201	3.84_391.1371m/z	391.137	3.84422	3,4,5-trihydroxy-6-(2-hydroxy-1,2-diphenylethoxy)oxane-2-carboxylic acid	C20H22O8	40.2	-4.11339	HILIC-POS
19548	6.93_274.1382m/z	274.138	6.9322	Ala Pro Ser	C11H19N3O5	40.3	-5.55822	HILIC-POS
HMDB0003459	1.57_161.0913m/z	161.091	1.5732	D-Alanyl-D-alanine	C6H12N2O3	40.3	-4.6757	HILIC-POS
HMDB0008901	1.15_730.5453m/z	730.545	1.15355	PE(15:0/20:2(11Z,14Z))	C40H76NO8P	40.3	9.84402	HILIC-POS
HMDB0028958	7.03_294.1793m/z	294.179	7.03253	Lysyl-Phenylalanine	C15H23N3O3	40.3	-6.57605	HILIC-POS
HMDB0031782	2.55_226.0904m/z	226.09	2.54763	Ethiofencarb	C11H15NO2S	40.3	3.32957	HILIC-POS
HMDB0033662	2.40_314.0900m/z	314.09	2.40065	(S)-5'-Deoxy-5'-(methylsulfinyl)adenosine	C11H15N5O4S	40.3	-5.59386	HILIC-POS
HMDB0126105	12.81_583.1835m/z	583.184	12.811	6-{[12,12-dimethyl-9-(2-methylpropanoyl)-4-oxo-6-phenyl-3,11,14-trioxatetracyclo[8.5.0.0Â²,â·.0Â¹Â³,Â¹âµ]pentadeca-1,5,7,9-tetraen-8-yl]oxy}-3,4,5-trihydroxyoxane-2-carboxylic acid	C30H30O12	40.3	4.30349	HILIC-POS
HMDB0127888	1.37_655.1915m/z	655.192	1.36838	6-[(2-{3-[(6-carboxy-3,4,5-trihydroxyoxan-2-yl)oxy]-4-ethylphenyl}-3,5-dihydroxy-3,4-dihydro-2H-1-benzopyran-7-yl)oxy]-3,4,5-trihydroxyoxane-2-carboxylic acid	C29H34O17	40.3	7.07092	HILIC-POS
HMDB0134940	7.58_354.0801m/z	354.08	7.58283	5-[(6-carboxy-3,4,5-trihydroxyoxan-2-yl)oxy]-1H-indole-3-carboxylic acid	C15H15NO9	40.3	-5.12757	HILIC-POS
20895	4.93_451.2648m/z	451.265	4.92632	Ile Tyr Arg	C21H34N6O5	40.4	-3.37982	HILIC-POS
21802	10.57_292.1105m/z	292.11	10.5716	Ser Ala Asp	C10H17N3O7	40.4	-11.824	HILIC-POS
HMDB0002095	9.34_248.1116m/z	248.112	9.34138	Malonylcarnitine	C10H17NO6	40.4	-5.07915	HILIC-POS
HMDB0039966	9.94_640.1717m/z	640.172	9.93768	Malvidin 3-glucoside-4-vinylguaiacol	C32H31O14+	40.4	-10.8356	HILIC-POS
HMDB0041221	9.45_429.1573m/z	429.157	9.45238	b-D-Xylopyranosyl-(1->4)-a-L-rhamnopyranosyl-(1->2)-L-arabinose	C16H28O13	40.4	-6.9936	HILIC-POS
129123	9.84_539.1933m/z	539.193	9.84268	Glu Phe Asp Glu	C23H30N4O11	40.5	-9.40626	HILIC-POS
223822	10.79_405.1959m/z	405.196	10.7858	Ser Ala Val Glu	C16H28N4O8	40.5	-5.15264	HILIC-POS
264545	10.15_632.3342m/z	632.334	10.1525	Asp Arg Val Lys Asp	C25H45N9O10	40.5	-3.23643	HILIC-POS
264810	12.27_484.2758m/z	484.276	12.2732	Thr Leu Pro Pro Gly	C22H37N5O7	40.5	-1.52162	HILIC-POS
HMDB0010392	1.22_548.3666m/z	548.367	1.21722	LysoPC(20:2(11Z,14Z))	C28H54NO7P	40.5	-8.19484	HILIC-POS
HMDB0036783	3.06_539.2155m/z	539.216	3.0636	Diosbulbinoside F	C26H34O12	40.5	5.96211	HILIC-POS
HMDB0040424	3.84_221.1196m/z	221.12	3.84422	Ethyl 2-benzylacetoacetate	C13H16O3	40.5	10.9819	HILIC-POS
HMDB0128710	10.41_401.1082m/z	401.108	10.413	3,4,5-trihydroxy-6-{[6-(3-hydroxyprop-1-en-1-yl)-4-methoxy-2H-1,3-benzodioxol-5-yl]oxy}oxane-2-carboxylic acid	C17H20O11	40.5	0.793119	HILIC-POS
HMDB0130837	7.70_101.0594m/z	101.059	7.69515	2-methylbut-3-enoic acid	C5H8O2	40.5	-3.01246	HILIC-POS
15828	9.58_390.2331m/z	390.233	9.58387	Asp Lys Lys	C16H31N5O6	40.6	-4.10024	HILIC-POS
22553	9.65_366.1324m/z	366.132	9.64503	Met Ser Glu	C13H23N3O7S	40.6	-1.61022	HILIC-POS
23988	2.66_217.1529m/z	217.153	2.6553	Val Val	C10H20N2O3	40.6	-8.18703	HILIC-POS
176347	12.56_504.2639m/z	504.264	12.563	Leu Asp Glu Lys	C21H37N5O9	40.6	-5.06664	HILIC-POS
HMDB0012107	17.18_813.6827m/z	813.683	17.1794	SM(d18:1/24:1(15Z))	C47H93N2O6P	40.6	-2.0633	HILIC-POS
HMDB0029874	6.88_129.0653m/z	129.065	6.88137	Squamolone	C5H8N2O2	40.6	-4.07609	HILIC-POS
HMDB0035007	6.30_447.1521m/z	447.152	6.30142	Lucuminic acid	C19H26O12	40.6	5.44908	HILIC-POS
HMDB0040624	13.88_635.1297m/z	635.13	13.8799	3'-(2'',3''-Digalloylglucosyl)-phloroacetophenone	C28H26O17	40.6	8.5816	HILIC-POS
HMDB0113855	9.97_732.5520m/z	732.552	9.96902	PE-NMe2(15:0/18:1(11Z))	C40H78NO8P	40.6	-2.40667	HILIC-POS
HMDB0124994	11.83_315.0732m/z	315.073	11.8257	6-(3-carboxyphenoxy)-3,4,5-trihydroxyoxane-2-carboxylic acid	C13H14O9	40.6	6.88046	HILIC-POS
63058	3.00_159.0906m/z	159.091	3.00445	1-Benzylimidazole	C10H10N2	40.7	-7.00529	HILIC-POS
HMDB0002242	12.05_653.2604m/z	653.26	12.045	Dehydroisocoproporphyrinogen	C36H36N4O8	40.7	-0.222285	HILIC-POS
HMDB0006049	11.88_262.0493m/z	262.049	11.8837	O-Phosphotyrosine	C9H12NO6P	40.7	7.05766	HILIC-POS
HMDB0007971	1.17_760.5847m/z	760.585	1.17305	PC(16:0/18:1(11Z))	C42H82NO8P	40.7	-0.56619	HILIC-POS
HMDB0008057	1.15_834.6002m/z	834.6	1.15355	PC(18:0/22:6(4Z,7Z,10Z,13Z,16Z,19Z))	C48H84NO8P	40.7	-0.680401	HILIC-POS
22113	13.09_389.2494m/z	389.249	13.0948	Arg Ile Thr	C16H32N6O5	40.8	-3.21467	HILIC-POS
224822	8.68_477.2169m/z	477.217	8.6791	Ser Glu Ile Glu	C19H32N4O10	40.8	-4.68937	HILIC-POS
HMDB0010407	1.20_480.3428m/z	480.343	1.20238	LysoPC(P-16:0)	C24H50NO6P	40.8	-4.29349	HILIC-POS
HMDB0061067	9.00_286.1127m/z	286.113	8.9969	arabinofuranosylguanine	C10H15N5O5	40.8	-6.65265	HILIC-POS
HMDB0001545	3.22_168.0644m/z	168.064	3.2166	Pyridoxal	C8H9NO3	40.9	-6.92391	HILIC-POS
HMDB0007112	0.73_617.5111m/z	617.511	0.734917	DG(16:0/20:4(5Z,8Z,11Z,14Z)/0:0)	C39H68O5	40.9	-4.61114	HILIC-POS
HMDB0011738	7.58_276.1177m/z	276.118	7.58283	N2-gamma-Glutamylglutamine	C10H17N3O6	40.9	-4.59075	HILIC-POS
18622	10.14_403.2285m/z	403.228	10.1362	Gln Gln Lys	C16H30N6O6	41	-3.73085	HILIC-POS
HMDB0007989	1.15_808.5823m/z	808.582	1.15355	PC(16:0/22:5(4Z,7Z,10Z,13Z,16Z))	C46H82NO8P	41	-3.45271	HILIC-POS
HMDB0015600	3.47_389.1580m/z	389.158	3.47242	Bepotastine	C21H25ClN2O3	41	-11.9395	HILIC-POS
HMDB0038634	7.20_269.0386m/z	269.039	7.20102	(-)-Dioxibrassinin	C11H12N2O2S2	41	-9.93658	HILIC-POS
HMDB0040521	2.67_597.3009m/z	597.301	2.6713	Dipiperamide D	C36H40N2O6	41	8.38386	HILIC-POS
21676	9.08_347.2023m/z	347.202	9.0814	Thr Ala Arg	C13H26N6O5	41.1	-4.14438	HILIC-POS
21764	10.30_306.1279m/z	306.128	10.2993	Glu Thr Gly	C11H19N3O7	41.1	-5.51929	HILIC-POS
65075	7.42_331.0914m/z	331.091	7.417	Phe-Gly-OH	C16H14N2O6	41.1	-3.13767	HILIC-POS
235927	12.27_477.2287m/z	477.229	12.2732	Thr Asn Asp Lys	C18H32N6O9	41.1	-3.38615	HILIC-POS
HMDB0001211	12.84_837.0532m/z	837.053	12.8443	Diadenosine tetraphosphate	C20H28N10O19P4	41.1	-2.85477	HILIC-POS
HMDB0038232	4.16_844.4895m/z	844.49	4.16087	Azaspiracid 4	C46H69NO13	41.1	6.37116	HILIC-POS
HMDB0060343	13.54_655.1676m/z	655.168	13.5388	2-(S-Glutathionyl)acetyl glutathione	C22H34N6O13S2	41.1	-3.41892	HILIC-POS
HMDB0094717	9.22_176.0905m/z	176.09	9.2169	hydroxyvalerylglycine	C7H13NO4	41.1	-7.33433	HILIC-POS
22144	9.47_417.2429m/z	417.243	9.46705	Glu Leu Arg	C17H32N6O6	41.2	-6.48265	HILIC-POS
HMDB0006595	10.95_516.2289m/z	516.229	10.9516	Alpha-Trisaccharide	C20H37NO14	41.2	0.42979	HILIC-POS
HMDB0008133	0.88_758.5697m/z	758.57	0.877583	PC(18:2(9Z,12Z)/16:0)	C42H80NO8P	41.2	0.382471	HILIC-POS
HMDB0014420	10.14_447.2183m/z	447.218	10.1362	Olmesartan	C24H26N6O3	41.2	9.93847	HILIC-POS
HMDB0031742	9.84_462.1627m/z	462.163	9.84268	4-(2-Nitroethyl)phenyl primeveroside	C19H27NO12	41.2	4.58675	HILIC-POS
HMDB0062555	4.71_262.1639m/z	262.164	4.70917	hydroxyisovaleroyl carnitine	C12H23NO5	41.2	-3.69417	HILIC-POS
23776	10.62_231.0970m/z	231.097	10.6213	Pro Asp	C9H14N2O5	41.3	-2.28159	HILIC-POS
264044	2.64_583.3217m/z	583.322	2.63947	Val His Glu Lys Ala	C25H42N8O8	41.3	3.16217	HILIC-POS
264167	2.64_602.3353m/z	602.335	2.63947	Glu Glu Val Leu Ile	C27H47N5O10	41.3	-7.02887	HILIC-POS
HMDB0011354	16.97_722.5092m/z	722.509	16.9746	PE(P-16:0/20:5(5Z,8Z,11Z,14Z,17Z))	C41H72NO7P	41.3	-3.80164	HILIC-POS
HMDB0038822	14.29_742.1998m/z	742.2	14.2891	Malvidin 3-(6-malonylglucoside) 5-glucoside	C32H37O20+	41.3	6.36342	HILIC-POS
HMDB0061043	12.29_833.4284m/z	833.428	12.289	27-O-demethylrifabutin	C45H60N4O11	41.3	-5.65119	HILIC-POS
17383	12.81_377.1640m/z	377.164	12.811	Asp Lys Asp	C14H24N4O8	41.4	-7.19562	HILIC-POS
21606	10.15_419.1873m/z	419.187	10.1525	Glu Arg Asp	C15H26N6O8	41.4	-2.87425	HILIC-POS
HMDB0007991	6.20_806.5647m/z	806.565	6.19775	PC(16:0/22:6(4Z,7Z,10Z,13Z,16Z,19Z))	C46H80NO8P	41.4	-5.88856	HILIC-POS
HMDB0011343	17.05_700.5254m/z	700.525	17.0541	PE(P-16:0/18:2(9Z,12Z))	C39H74NO7P	41.4	-3.04079	HILIC-POS
HMDB0029082	3.96_334.1361m/z	334.136	3.96272	Tryptophyl-Glutamate	C16H19N3O5	41.4	-10.8228	HILIC-POS
HMDB0033106	8.68_323.1432m/z	323.143	8.6791	N6-Galacturonyl-L-lysine	C12H22N2O8	41.4	-5.15233	HILIC-POS
HMDB0038846	11.54_427.1042m/z	427.104	11.5371	(-)-Epiafzelechin 3-gallate	C22H18O9	41.4	4.26792	HILIC-POS
HMDB0135734	8.17_674.2084m/z	674.208	8.16845	2-amino-4-({1-[(carboxymethyl)-C-hydroxycarbonimidoyl]-2-{[9-hydroxy-3-(2-hydroxy-4-methoxyphenyl)-8,8-dimethyl-2-oxo-2H,8H,9H,10H-pyrano[2,3-h]chromen-10-yl]sulfanyl}ethyl}-C-hydroxycarbonimidoyl)butanoic acid	C31H35N3O12S	41.4	10.2961	HILIC-POS
HMDB0240253	7.71_168.0313m/z	168.031	7.71082	N-Acetyltaurine	C4H9NO4S	41.4	-7.28029	HILIC-POS
HMDB0011105	3.05_227.0778m/z	227.078	3.0486	5-Acetylamino-6-formylamino-3-methyluracil	C8H10N4O4	41.5	1.54328	HILIC-POS
HMDB0112530	16.96_838.5574m/z	838.557	16.9586	PS(20:0/20:5(5Z,8Z,11Z,14Z,17Z))	C46H80NO10P	41.5	-2.26333	HILIC-POS
110028	7.42_432.2800m/z	432.28	7.417	Ala Thr Ile Lys	C19H37N5O6	41.6	-3.76736	HILIC-POS
155467	1.17_560.3246m/z	560.325	1.17305	His Leu Tyr Lys	C27H41N7O6	41.6	9.76542	HILIC-POS
HMDB0112521	1.20_814.5589m/z	814.559	1.20238	PS(20:0/18:3(9Z,12Z,15Z))	C44H80NO10P	41.6	-0.447613	HILIC-POS
HMDB0133282	9.25_347.0836m/z	347.084	9.25088	3-{3-[(3,3-dimethyloxiran-2-yl)methyl]-4-hydroxyphenyl}-2-(sulfooxy)propanoic acid	C14H18O8S	41.6	11.7415	HILIC-POS
73549	3.47_174.1115m/z	174.111	3.47242	Acetyl-DL-Leucine	C8H15NO3	41.7	-5.70237	HILIC-POS
159787	9.18_418.2639m/z	418.264	9.18307	Ile Ala Ser Lys	C18H35N5O6	41.7	-4.99351	HILIC-POS
HMDB0034899	9.68_435.2071m/z	435.207	9.6762	1,1'-Ethylidenebistryptophan	C24H26N4O4	41.7	10.1397	HILIC-POS
HMDB0112388	16.99_790.5668m/z	790.567	16.9904	PS(18:1(11Z)/18:0)	C42H80NO10P	41.7	9.49669	HILIC-POS
226113	14.19_513.2526m/z	513.253	14.1883	Ser His Asn Arg	C19H32N10O7	41.8	-0.402694	HILIC-POS
HMDB0007869	0.89_706.5385m/z	706.538	0.8924	PC(14:0/16:0)	C38H76NO8P	41.8	0.480332	HILIC-POS
HMDB0009675	1.15_750.5410m/z	750.541	1.15355	PE(22:5(7Z,10Z,13Z,16Z,19Z)/P-16:0)	C43H76NO7P	41.8	-3.01074	HILIC-POS
HMDB0036294	3.20_391.1371m/z	391.137	3.2011	(E)-2-Glucosyl-3,4',5-trihydroxystilbene	C20H22O8	41.8	-4.24608	HILIC-POS
HMDB0040367	1.37_309.1265m/z	309.127	1.36838	Azacridone A	C18H16N2O3	41.8	10.2661	HILIC-POS
21483	9.69_359.2024m/z	359.202	9.69103	Ser Pro Arg	C14H26N6O5	41.9	-3.85558	HILIC-POS
HMDB0003282	1.69_166.0716m/z	166.072	1.68685	1-Methylguanine	C6H7N5O	41.9	-4.35053	HILIC-POS
HMDB0033347	11.18_315.1865m/z	315.186	11.1814	Lotusine	C19H24NO3+	41.9	11.418	HILIC-POS
HMDB0040570	1.15_355.0625m/z	355.062	1.15355	2-O-p-Coumaroylhydroxycitric acid	C15H14O10	41.9	-9.85374	HILIC-POS
154982	12.20_500.2428m/z	500.243	12.196	His Lys Ser Glu	C20H33N7O8	42	-7.11992	HILIC-POS
HMDB0000998	14.14_467.9953m/z	467.995	14.1386	dCTP	C9H16N3O13P3	42	-3.44174	HILIC-POS
HMDB0029384	6.15_192.0993m/z	192.099	6.14542	4-Hydroxycitrulline	C6H13N3O4	42	7.31821	HILIC-POS
17638	8.41_382.1981m/z	382.198	8.41362	Leu Ser Tyr	C18H27N3O6	42.1	2.27461	HILIC-POS
18340	13.79_392.1284m/z	392.128	13.7906	Asp Glu Glu	C14H21N3O10	42.1	-3.96095	HILIC-POS
HMDB0001235	7.80_296.0649m/z	296.065	7.80448	5-Aminoimidazole ribonucleotide	C8H14N3O7P	42.1	2.22185	HILIC-POS
HMDB0028903	9.27_247.1278m/z	247.128	9.26688	Isoleucyl-Aspartate	C10H18N2O5	42.1	-4.37496	HILIC-POS
16527	10.20_362.1930m/z	362.193	10.2015	Glu Thr Leu	C15H27N3O7	42.2	2.14352	HILIC-POS
96312	8.17_292.1024m/z	292.102	8.16845	Toyocamycin	C12H13N5O4	42.2	-5.75128	HILIC-POS
HMDB0000497	10.07_247.0916m/z	247.092	10.0742	5,6-Dihydrouridine	C9H14N2O6	42.2	-3.42887	HILIC-POS
HMDB0060943	12.51_389.1308m/z	389.131	12.5132	Sulfinpyrazone sulfide	C23H20N2O2S	42.2	-2.63652	HILIC-POS
HMDB0135096	8.23_723.1903m/z	723.19	8.22828	6-(5-{8-[3,7-dihydroxy-2-(3-hydroxyphenyl)-3,4-dihydro-2H-1-benzopyran-4-yl]-3,5,7-trihydroxy-3,4-dihydro-2H-1-benzopyran-2-yl}-2-hydroxyphenoxy)-3,4,5-trihydroxyoxane-2-carboxylic acid	C36H34O16	42.2	-2.3523	HILIC-POS
22344	6.95_389.2489m/z	389.249	6.94903	Thr Leu Arg	C16H32N6O5	42.3	-4.55243	HILIC-POS
62429	6.32_306.0480m/z	306.048	6.3184	2',3' cyclic CMP	C9H12N3O7P	42.3	-1.73601	HILIC-POS
155967	6.71_545.2855m/z	545.286	6.71222	His Asn Phe Lys	C25H36N8O6	42.3	4.49598	HILIC-POS
HMDB0008055	1.35_836.6085m/z	836.609	1.35288	PC(18:0/22:5(4Z,7Z,10Z,13Z,16Z))	C48H86NO8P	42.3	-9.41856	HILIC-POS
HMDB0028797	8.20_204.0955m/z	204.096	8.19812	Glutaminylglycine	C7H13N3O4	42.3	-11.6654	HILIC-POS
HMDB0039132	0.77_353.1956m/z	353.196	0.765917	[4]-Gingerdiol 3,5-diacetate	C19H28O6	42.3	-0.813327	HILIC-POS
181601	12.39_471.2152m/z	471.215	12.3852	Leu Ser His Asp	C19H30N6O8	42.4	-9.83827	HILIC-POS
HMDB0014883	8.88_274.0894m/z	274.089	8.87958	Modafinil	C15H15NO2S	42.4	-0.661815	HILIC-POS
HMDB0036346	6.20_221.0431m/z	221.043	6.19775	7-Hydroxy-2-methyl-4-oxo-4H-1-benzopyran-5-carboxylic acid	C11H8O5	42.4	-6.13909	HILIC-POS
21151	12.50_320.1078m/z	320.108	12.4967	Gly Asp Glu	C11H17N3O8	42.5	-3.40996	HILIC-POS
22413	12.53_306.0923m/z	306.092	12.5298	Asp Asp Gly	C10H15N3O8	42.5	-3.05332	HILIC-POS
65318	12.06_356.0746m/z	356.075	12.0599	Asp-Asn-OH	C13H13N3O9	42.5	5.98002	HILIC-POS
154947	1.38_540.3294m/z	540.329	1.38338	His Lys Gln Lys	C23H41N9O6	42.5	7.77183	HILIC-POS
HMDB0000014	6.73_228.0966m/z	228.097	6.72905	Deoxycytidine	C9H13N3O4	42.5	-5.54592	HILIC-POS
HMDB0000670	10.49_189.1340m/z	189.134	10.4886	Homo-L-arginine	C7H16N4O2	42.5	-3.37241	HILIC-POS
HMDB0001508	11.97_412.0400m/z	412.04	11.9714	dADP	C10H15N5O9P2	42.5	-4.43163	HILIC-POS
HMDB0009050	17.18_728.5564m/z	728.556	17.1794	PE(18:1(11Z)/P-18:1(11Z))	C41H78NO7P	42.5	-3.41895	HILIC-POS
HMDB0029711	11.83_287.0542m/z	287.054	11.8257	Maritimetin	C15H10O6	42.5	-2.78402	HILIC-POS
HMDB0059611	2.14_148.0412m/z	148.041	2.13983	Thiomorpholine 3-carboxylate	C5H9NO2S	42.5	-9.79249	HILIC-POS
HMDB0135733	13.03_674.1985m/z	674.198	13.0278	2-amino-4-({1-[(carboxymethyl)-C-hydroxycarbonimidoyl]-2-{[10-hydroxy-3-(2-hydroxy-4-methoxyphenyl)-8,8-dimethyl-2-oxo-2H,8H,9H,10H-pyrano[2,3-h]chromen-9-yl]sulfanyl}ethyl}-C-hydroxycarbonimidoyl)butanoic acid	C31H35N3O12S	42.5	-4.34269	HILIC-POS
HMDB0240217	2.77_271.0736m/z	271.074	2.76747	3-(Cystein-S-yl)acetaminophen	C11H14N2O4S	42.5	-4.26054	HILIC-POS
65203	8.11_365.1055m/z	365.105	8.10763	Ser-His-OH	C15H16N4O7	42.6	-10.2135	HILIC-POS
238287	8.61_418.2641m/z	418.264	8.6121	Thr Val Ala Lys	C18H35N5O6	42.6	-4.61688	HILIC-POS
HMDB0000034	13.79_136.0606m/z	136.061	13.7906	Adenine	C5H5N5	42.6	-8.70048	HILIC-POS
HMDB0005765	9.41_290.1333m/z	290.133	9.40522	Ophthalmic acid	C11H19N3O6	42.6	-4.68522	HILIC-POS
HMDB0029190	2.08_399.1259m/z	399.126	2.0755	5-(3',4'-dihydroxyphenyl)-gamma-valerolactone-3'-O-glucuronide	C18H22O10	42.6	-6.68044	HILIC-POS
362	9.01_220.0804m/z	220.08	9.01375	O-Succinyl-L-homoserine	C8H13NO6	42.7	-5.24967	HILIC-POS
HMDB0012444	1.17_836.5434m/z	836.543	1.17305	PS(22:6(4Z,7Z,10Z,13Z,16Z,19Z)/18:0)	C46H78NO10P	42.7	-0.226708	HILIC-POS
HMDB0013407	6.95_768.5829m/z	768.583	6.94903	PC(o-16:0/20:4(8Z,11Z,14Z,17Z))	C44H82NO7P	42.7	-9.40695	HILIC-POS
HMDB0041222	9.69_459.1675m/z	459.168	9.69103	a-L-Fucopyranosyl-(1->2)-b-D-galactopyranosyl-(1->2)-D-xylose	C17H30O14	42.7	-7.1666	HILIC-POS
17413	10.32_474.1829m/z	474.183	10.3156	Glu Tyr Tyr	C23H27N3O8	42.8	-8.93855	HILIC-POS
45240	11.43_225.0146m/z	225.015	11.4313	SC-514	C9H8N2OS2	42.8	-1.9857	HILIC-POS
179887	8.40_445.2752m/z	445.275	8.39712	Leu Asn Ala Lys	C19H36N6O6	42.8	-3.86184	HILIC-POS
HMDB0002014	1.19_370.2934m/z	370.293	1.18772	cis-5-Tetradecenoylcarnitine	C21H39NO4	42.8	-4.71853	HILIC-POS
HMDB0135504	10.28_470.1431m/z	470.143	10.283	3-(3,4-dimethoxyphenyl)-N-[2-(3,4-dimethoxyphenyl)ethyl]-3-(sulfooxy)propanimidic acid	C21H27NO9S	42.8	-10.2488	HILIC-POS
15668	7.18_359.2384m/z	359.238	7.18452	Leu Ala Arg	C15H30N6O4	42.9	-4.70862	HILIC-POS
16016	11.52_347.1659m/z	347.166	11.5228	Gly Arg Asp	C12H22N6O6	42.9	-4.30582	HILIC-POS
HMDB0061822	1.02_283.1740m/z	283.174	1.02473	Hexaethylene glycol	C12H26O7	42.9	-4.03165	HILIC-POS
HMDB0062262	3.44_882.1916m/z	882.192	3.44242	3S-hydroxy-hexanoyl-CoA	C27H46N7O18P3S	42.9	1.21594	HILIC-POS
HMDB0112844	1.17_838.5574m/z	838.557	1.17305	PS(22:5(7Z,10Z,13Z,16Z,19Z)/18:0)	C46H80NO10P	42.9	-2.26137	HILIC-POS
16402	11.97_375.1972m/z	375.197	11.9714	Ala Glu Arg	C14H26N6O6	43	-3.81682	HILIC-POS
19290	3.16_416.2578m/z	416.258	3.15527	Gln Arg Leu	C17H33N7O5	43	-9.07365	HILIC-POS
19688	10.41_379.1281m/z	379.128	10.413	Asp Asn Met	C13H22N4O7S	43	-0.148329	HILIC-POS
23953	10.06_263.0865m/z	263.087	10.0593	Asp Glu	C9H14N2O7	43	-3.31271	HILIC-POS
HMDB0028753	11.43_191.0651m/z	191.065	11.4313	Aspartyl-Glycine	C6H10N2O5	43	-5.79608	HILIC-POS
HMDB0029237	13.15_550.1253m/z	550.125	13.1453	Cyanidin 3-(6''-succinyl-glucoside)	C25H25O14+	43	-11.6508	HILIC-POS
HMDB0031179	1.01_156.1369m/z	156.137	1.01007	2,2,6,6-Tetramethyl-4-piperidinone	C9H17NO	43	-9.18198	HILIC-POS
HMDB0031346	3.32_192.0855m/z	192.085	3.32175	Calystegine C1	C7H13NO5	43	-6.04616	HILIC-POS
HMDB0037541	8.17_657.1645m/z	657.165	8.16845	Patuletin 3-gentiobioside	C28H32O18	43	-2.49465	HILIC-POS
HMDB0038401	14.09_426.0558m/z	426.056	14.0879	Glucosinalbin	C14H19NO10S2	43	8.1808	HILIC-POS
HMDB0115421	0.72_801.5507m/z	801.551	0.718583	PA(22:6(4Z,7Z,10Z,13Z,16Z,19Z)/22:2(13Z,16Z))	C47H77O8P	43	9.72129	HILIC-POS
18755	10.25_417.2438m/z	417.244	10.2503	Ile Glu Arg	C17H32N6O6	43.1	-4.4141	HILIC-POS
HMDB0062251	6.44_90.0542m/z	90.0542	6.4434	(alpha-D-mannosyl)7-beta-D-mannosyl-diacetylchitobiosyl-L-asparagine, isoform A (protein)	C3H7NO2	43.1	-8.20307	HILIC-POS
HMDB0000206	7.77_189.1220m/z	189.122	7.77132	N6-Acetyl-L-lysine	C8H16N2O3	43.2	-7.26886	HILIC-POS
HMDB0029118	2.74_281.1485m/z	281.148	2.73563	Tyrosyl-Valine	C14H20N2O4	43.2	-4.02062	HILIC-POS
183167	3.81_570.3272m/z	570.327	3.81323	Leu Tyr Phe Lys	C30H43N5O6	43.3	-2.49988	HILIC-POS
HMDB0002399	10.15_239.0690m/z	239.069	10.1525	Cystathionine sulfoxide	C7H14N2O5S	43.3	-2.66424	HILIC-POS
HMDB0029913	8.41_304.0991m/z	304.099	8.41362	Gynocardin	C12H17NO8	43.3	-11.8871	HILIC-POS
HMDB0062525	12.65_352.1159m/z	352.116	12.6458	S-(2-Hydroxyethyl)glutathione	C12H21N3O7S	43.3	-3.86617	HILIC-POS
3623	6.23_599.2336m/z	599.234	6.23258	GalÎ²1-4[FucÎ±1-3]GlcNAcÎ²-Sp	C22H38N4O15	43.4	-11.8381	HILIC-POS
264584	8.88_560.3378m/z	560.338	8.87958	Asn Ser Lys Ile Val	C24H45N7O8	43.4	-4.28248	HILIC-POS
HMDB0000157	10.32_137.0447m/z	137.045	10.3156	Hypoxanthine	C5H4N4O	43.4	-7.74645	HILIC-POS
HMDB0001241	9.41_158.0437m/z	158.044	9.40522	2-Aminomuconic acid	C6H7NO4	43.4	-6.913	HILIC-POS
HMDB0008163	6.22_728.5226m/z	728.523	6.21525	PC(18:3(6Z,9Z,12Z)/14:0)	C40H74NO8P	43.4	0.0959617	HILIC-POS
HMDB0014456	13.01_259.0200m/z	259.02	13.011	Ethoxzolamide	C9H10N2O3S2	43.4	-2.15925	HILIC-POS
HMDB0030057	0.73_413.2648m/z	413.265	0.734917	Boviquinone 4	C26H36O4	43.4	-9.34858	HILIC-POS
HMDB0039617	11.70_385.1265m/z	385.127	11.6956	Piperenol B	C21H20O7	43.5	-4.35099	HILIC-POS
HMDB0127966	9.65_291.0194m/z	291.019	9.64503	3-[3-hydroxy-5-methoxy-4-(sulfooxy)phenyl]prop-2-enoic acid	C10H10O8S	43.5	8.41849	HILIC-POS
2999	11.87_485.3065m/z	485.306	11.8692	Gallopamil	C28H40N2O5	43.6	11.2826	HILIC-POS
23618	11.41_305.1077m/z	305.108	11.4149	Gly Asp Asn	C10H16N4O7	43.6	-4.96276	HILIC-POS
HMDB0011671	13.54_622.0320m/z	622.032	13.5388	ADP-ribose 1"-2" cyclic phosphate	C15H22N5O16P3	43.6	-4.32316	HILIC-POS
HMDB0039084	9.97_409.1833m/z	409.183	9.96902	3-O-Methylniveusin A	C21H28O8	43.6	-5.92804	HILIC-POS
HMDB0116782	0.73_884.5416m/z	884.542	0.734917	PS(22:4(7Z,10Z,13Z,16Z)/22:6(4Z,7Z,10Z,13Z,16Z,19Z))	C50H78NO10P	43.6	-2.27258	HILIC-POS
19776	3.84_411.2200m/z	411.22	3.84422	Thr Tyr Lys	C19H30N4O6	43.7	-9.41217	HILIC-POS
264041	11.35_460.2384m/z	460.238	11.3509	Gly Val Ala Asp Val	C19H33N5O8	43.7	-3.94246	HILIC-POS
HMDB0000600	13.32_325.1590m/z	325.159	13.3243	Galactosylhydroxylysine	C12H24N2O8	43.7	-4.65717	HILIC-POS
HMDB0029336	0.91_648.3778m/z	648.378	0.907233	Nummularine A	C36H49N5O6	43.7	3.49367	HILIC-POS
HMDB0034753	3.41_453.1383m/z	453.138	3.41225	7-Hydroxybutylidenephthalide 7-(6-malonylglucoside)	C21H24O11	43.7	-1.82587	HILIC-POS
HMDB0038329	2.72_510.1857m/z	510.186	2.71947	Dide-O-methyl-4-O-alpha-D-glucopyranosylsimmondsin	C20H31NO14	43.7	7.80461	HILIC-POS
HMDB0041148	12.26_583.2380m/z	583.238	12.2575	(+)-Lyoniresinol 9-glucoside	C28H38O13	43.7	-0.93017	HILIC-POS
20672	10.51_306.1282m/z	306.128	10.5053	Thr Glu Gly	C11H19N3O7	43.8	-4.61093	HILIC-POS
44013	1.17_434.3372m/z	434.337	1.17305	ELAIDYLPHOSPHOCHOLINE	C23H48NO4P	43.8	-4.96527	HILIC-POS
HMDB0004985	11.24_262.1388m/z	262.139	11.2434	N6-beta-Aspartyllysine	C10H19N3O5	43.8	-3.51946	HILIC-POS
HMDB0011494	1.31_528.3064m/z	528.306	1.30705	LysoPE(0:0/22:5(4Z,7Z,10Z,13Z,16Z))	C27H46NO7P	43.8	-3.99254	HILIC-POS
HMDB0038486	3.84_368.0673m/z	368.067	3.84422	Tetraphyllin B sulfate	C12H17NO10S	43.8	7.34531	HILIC-POS
HMDB0041542	12.12_499.2227m/z	499.223	12.1197	N2-Maltulosylarginine	C18H34N4O12	43.8	-3.7439	HILIC-POS
HMDB0042044	7.70_434.1422m/z	434.142	7.69515	Tolmetin glucuronide	C21H23NO9	43.8	-5.55085	HILIC-POS
HMDB0061496	3.16_922.6622m/z	922.662	3.15527	PE(DiMe(13,5)/MonoMe(13,5))	C52H92NO10P	43.8	9.85148	HILIC-POS
HMDB0127805	7.20_515.0871m/z	515.087	7.20102	4-{7-[(6-carboxy-3,4,5-trihydroxyoxan-2-yl)oxy]-3-hydroxy-5-sulfino-3,4-dihydro-2H-1-benzopyran-2-yl}-2-hydroxybenzen-1-olate	C21H22O13S	43.8	3.37426	HILIC-POS
HMDB0011491	1.22_536.3686m/z	536.369	1.21722	LysoPE(0:0/22:1(13Z))	C27H54NO7P	43.9	-4.60331	HILIC-POS
HMDB0015548	5.83_355.1699m/z	355.17	5.8321	Valganciclovir	C14H22N6O5	43.9	-7.16386	HILIC-POS
HMDB0029830	0.91_367.1308m/z	367.131	0.907233	N-Caffeoyltryptophan	C20H18N2O5	43.9	5.32192	HILIC-POS
HMDB0039110	10.20_231.0972m/z	231.097	10.2015	(2S,3'S)-alpha-Amino-2-carboxy-5-oxo-1-pyrrolidinebutanoic acid	C9H14N2O5	43.9	-1.72603	HILIC-POS
HMDB0059786	13.57_876.4303m/z	876.43	13.5713	Gliadorphin	C43H57N9O11	43.9	5.98149	HILIC-POS
HMDB0127865	8.23_349.1304m/z	349.13	8.22828	2-[3-hydroxy-2-methoxy-4-(methoxymethyl)phenyl]-3,4-dihydro-2H-1-benzopyran-3,5,7-triol	C18H20O7	43.9	6.47811	HILIC-POS
HMDB0135022	8.33_899.1752m/z	899.175	8.33445	{4-[2-(3,4-dihydroxyphenyl)-8-[2-(3,4-dihydroxyphenyl)-3,7-dihydroxy-3,4-dihydro-2H-1-benzopyran-4-yl]-3,5,7-trihydroxy-3,4-dihydro-2H-1-benzopyran-6-yl]-7-hydroxy-2-(3-hydroxyphenyl)-3,4-dihydro-2H-1-benzopyran-3-yl}oxidanesulfonic acid	C45H38O18S	43.9	-11.1242	HILIC-POS
16025	7.68_331.2327m/z	331.233	7.67932	Leu Ala Lys	C15H30N4O4	44	-4.01877	HILIC-POS
18031	9.05_367.1950m/z	367.195	9.0474	Gly Tyr Lys	C17H26N4O5	44.1	-7.09827	HILIC-POS
HMDB0000295	13.26_405.0094m/z	405.009	13.2618	Uridine 5'-diphosphate	C9H14N2O12P2	44.1	-0.230331	HILIC-POS
HMDB0009795	1.20_885.5460m/z	885.546	1.20238	PI(16:0/22:5(4Z,7Z,10Z,13Z,16Z))	C47H81O13P	44.1	-3.08841	HILIC-POS
HMDB0011610	11.99_398.0679m/z	398.068	11.9861	5-Taurinomethyl-2-thiouridine	C12H19N3O8S2	44.1	-1.86971	HILIC-POS
HMDB0135801	11.26_540.1671m/z	540.167	11.2593	2-amino-4-({1-[(carboxymethyl)-C-hydroxycarbonimidoyl]-2-{[2-hydroxy-2-methoxy-1-(7-methyl-2-oxo-2H-chromen-6-yl)ethyl]sulfanyl}ethyl}-C-hydroxycarbonimidoyl)butanoic acid	C23H29N3O10S	44.1	4.61299	HILIC-POS
21633	6.63_450.2443m/z	450.244	6.63272	Arg Gln Phe	C20H31N7O5	44.2	-3.65453	HILIC-POS
23536	3.81_418.2070m/z	418.207	3.81323	Val Asn Trp	C20H27N5O5	44.2	-3.69319	HILIC-POS
210622	10.20_488.2755m/z	488.275	10.2015	Gln Ile Val Glu	C21H37N5O8	44.2	8.13057	HILIC-POS
HMDB0013464	0.89_703.5732m/z	703.573	0.8924	SM(d18:0/16:1(9Z))	C39H79N2O6P	44.2	-2.41075	HILIC-POS
HMDB0028868	7.68_260.1604m/z	260.16	7.67932	Hydroxyprolyl-Lysine	C11H21N3O4	44.2	-0.366698	HILIC-POS
HMDB0127732	14.31_469.1354m/z	469.135	14.3064	6-{2-[3-(3,4-dihydroxyphenyl)-2-hydroxypropyl]-3,5-dihydroxyphenoxy}-3,4,5-trihydroxyoxane-2-carboxylic acid	C21H24O12	44.2	2.8206	HILIC-POS
155233	1.46_538.3479m/z	538.348	1.46137	His Leu Ile Arg	C24H43N9O5	44.3	3.56991	HILIC-POS
264372	7.13_680.3566m/z	680.357	7.13402	Gln Arg Val Met Phe	C30H49N9O7S	44.3	2.62891	HILIC-POS
HMDB0001546	13.63_404.0240m/z	404.024	13.6318	CDP	C9H15N3O11P2	44.3	-3.65401	HILIC-POS
HMDB0037848	2.90_238.0921m/z	238.092	2.90095	N-(1-Deoxy-1-fructosyl)glycine	C8H15NO7	44.3	-0.045294	HILIC-POS
HMDB0127917	4.71_501.0641m/z	501.064	4.70917	(2-{[2-(3,4-dihydroxyphenyl)-5,7-dihydroxy-5H-chromen-3-yl]oxy}-3,5-dihydroxyoxan-4-yl)oxidanesulfonic acid	C20H20O13S	44.3	-11.2125	HILIC-POS
18077	11.99_348.1380m/z	348.138	11.9861	Ala Glu Glu	C13H21N3O8	44.4	-6.28477	HILIC-POS
HMDB0000082	14.34_483.9909m/z	483.991	14.3406	Cytidine triphosphate	C9H16N3O14P3	44.4	-1.91564	HILIC-POS
HMDB0002210	2.72_152.0689m/z	152.069	2.71947	2-Phenylglycine	C8H9NO2	44.4	-10.9673	HILIC-POS
214607	9.15_475.2849m/z	475.285	9.14923	Gln Val Thr Lys	C20H38N6O7	44.5	-5.46349	HILIC-POS
HMDB0000043	3.62_118.0861m/z	118.086	3.6204	Betaine	C5H11NO2	44.5	-1.67359	HILIC-POS
HMDB0009786	16.96_863.5619m/z	863.562	16.9586	PI(16:0/20:2(11Z,14Z))	C45H83O13P	44.5	-2.87672	HILIC-POS
HMDB0028967	6.66_306.1582m/z	306.158	6.66388	Methionyl-Arginine	C11H23N5O3S	44.5	-4.09932	HILIC-POS
HMDB0029126	9.42_247.1272m/z	247.127	9.42172	Valyl-Glutamate	C10H18N2O5	44.5	-6.71068	HILIC-POS
17233	8.80_418.2393m/z	418.239	8.79675	Arg Lys Asp	C16H31N7O6	44.6	-3.69133	HILIC-POS
19458	8.58_347.1915m/z	347.191	8.57843	Glu Ala Lys	C14H26N4O6	44.6	-2.95463	HILIC-POS
HMDB0028857	7.15_288.1659m/z	288.166	7.15085	Hydroxyprolyl-Arginine	C11H21N5O4	44.6	-2.63986	HILIC-POS
HMDB0031702	1.01_114.0901m/z	114.09	1.01007	1-Piperidinecarboxaldehyde	C6H11NO	44.6	-11.1643	HILIC-POS
HMDB0041525	7.20_247.0577m/z	247.058	7.20102	Coriandrone C	C13H10O5	44.6	-9.73988	HILIC-POS
HMDB0129161	10.36_407.1645m/z	407.165	10.3643	3-(3-hydroxyphenyl)-2-phenyl-4-[(E)-2-phenylethenyl]-2,3-dihydro-1-benzofuran-6-ol	C28H22O3	44.6	0.865762	HILIC-POS
23939	9.23_213.0978m/z	213.098	9.23388	Gly His	C8H12N4O3	44.7	-1.79132	HILIC-POS
135762	9.06_508.2498m/z	508.25	9.0644	Phe Ala Arg Asp	C22H33N7O7	44.7	-3.10683	HILIC-POS
HMDB0006953	11.85_391.0645m/z	391.064	11.8547	1-Phosphatidyl-D-myo-inositol	C11H19O13P	44.7	2.29083	HILIC-POS
HMDB0011493	8.91_530.3275m/z	530.327	8.91292	LysoPE(0:0/22:4(7Z,10Z,13Z,16Z))	C27H48NO7P	44.7	6.31804	HILIC-POS
HMDB0029011	10.35_272.1701m/z	272.17	10.3478	Prolyl-Arginine	C11H21N5O3	44.7	-6.00802	HILIC-POS
19110	8.40_405.2083m/z	405.208	8.39712	Thr Glu Arg	C15H28N6O7	44.8	-2.3478	HILIC-POS
22907	4.14_407.2639m/z	407.264	4.14437	Phe Lys Leu	C21H34N4O4	44.8	-3.33939	HILIC-POS
23332	12.99_405.1962m/z	405.196	12.9942	Glu Glu Lys	C16H28N4O8	44.8	-4.31259	HILIC-POS
HMDB0000631	1.70_450.3193m/z	450.319	1.70253	Deoxycholic acid glycine conjugate	C26H43NO5	44.8	-4.57971	HILIC-POS
HMDB0001125	11.28_243.0255m/z	243.026	11.2753	Inositol cyclic phosphate	C6H11O8P	44.8	-3.6517	HILIC-POS
HMDB0029719	13.82_143.0177m/z	143.018	13.8203	Methyl thiophene-2-carboxylate	C6H6O2S	44.8	11.3502	HILIC-POS
HMDB0033282	7.80_537.1934m/z	537.193	7.80448	8-Hydroxypinoresinol 4-glucoside	C26H32O12	44.8	-6.10541	HILIC-POS
19968	9.36_373.2176m/z	373.218	9.35688	Thr Pro Arg	C15H28N6O5	44.9	-4.9461	HILIC-POS
21519	12.17_347.1910m/z	347.191	12.1654	Ala Glu Lys	C14H26N4O6	44.9	-4.39539	HILIC-POS
HMDB0001423	11.21_768.1207m/z	768.121	11.2128	Coenzyme A	C21H36N7O16P3S	44.9	-2.28216	HILIC-POS
HMDB0008082	6.90_808.5812m/z	808.581	6.89887	PC(18:1(11Z)/20:4(8Z,11Z,14Z,17Z))	C46H82NO8P	44.9	-4.829	HILIC-POS
HMDB0028791	10.00_303.1761m/z	303.176	9.99968	Glutaminylarginine	C11H22N6O4	44.9	-4.70051	HILIC-POS
HMDB0001173	1.20_298.0960m/z	298.096	1.20238	5'-Methylthioadenosine	C11H15N5O3S	45	-2.84754	HILIC-POS
HMDB0029078	4.03_319.1390m/z	319.139	4.03022	Tryptophyl-Asparagine	C15H18N4O4	45	-3.35264	HILIC-POS
18387	9.58_333.1868m/z	333.187	9.58387	Ser Ala Arg	C12H24N6O5	45.1	-3.78773	HILIC-POS
23293	11.41_375.1972m/z	375.197	11.4149	Ala Arg Glu	C14H26N6O6	45.1	-4.02542	HILIC-POS
62984	10.71_158.0913m/z	158.091	10.7126	V-PYRRO/NO	C6H11N3O2	45.1	-7.06488	HILIC-POS
HMDB0003335	11.87_429.0170m/z	429.017	11.8692	IDP	C10H14N4O11P2	45.1	-8.61582	HILIC-POS
HMDB0034590	5.26_419.0606m/z	419.061	5.26463	Shoyuflavone C	C19H14O11	45.1	-0.581215	HILIC-POS
HMDB0037876	1.00_154.1213m/z	154.121	0.9954	5-Ethyl-2-methyl-4-propyloxazole	C9H15NO	45.1	-8.65866	HILIC-POS
HMDB0060510	10.25_393.1491m/z	393.149	10.2503	SN-38	C22H20N2O5	45.1	11.7022	HILIC-POS
239602	8.61_455.2232m/z	455.223	8.6121	Val Ala His Glu	C19H30N6O7	45.2	-3.66544	HILIC-POS
HMDB0001200	3.08_237.0855m/z	237.086	3.07912	N'-Formylkynurenine	C11H12N2O4	45.2	-6.27469	HILIC-POS
HMDB0007982	1.15_782.5668m/z	782.567	1.15355	PC(16:0/20:4(5Z,8Z,11Z,14Z))	C44H80NO8P	45.2	-3.3852	HILIC-POS
HMDB0113929	4.96_754.5302m/z	754.53	4.95915	PE-NMe2(15:0/20:4(8Z,11Z,14Z,17Z))	C42H76NO8P	45.2	-10.5614	HILIC-POS
17442	7.38_345.2229m/z	345.223	7.38367	Leu Gly Arg	C14H28N6O4	45.3	-4.4626	HILIC-POS
23461	12.02_319.1606m/z	319.161	12.0155	Asp Gly Lys	C12H22N4O6	45.3	-1.89152	HILIC-POS
157822	12.13_471.2158m/z	471.216	12.1347	His Ser Val Glu	C19H30N6O8	45.3	-8.52164	HILIC-POS
HMDB0007890	6.22_780.5502m/z	780.55	6.21525	PC(14:0/22:5(4Z,7Z,10Z,13Z,16Z))	C44H78NO8P	45.3	-4.59681	HILIC-POS
HMDB0030987	11.91_243.1577m/z	243.158	11.9129	2-Carboxy-4-dodecanolide	C13H22O4	45.3	-5.90375	HILIC-POS
HMDB0039528	6.97_766.5680m/z	766.568	6.96537	2-O-(5,8,11,14,17-Eicosapentaenoyl)-1-O-hexadecylglycero-3-phosphocholine	C44H80NO7P	45.3	-8.47887	HILIC-POS
21788	3.96_280.1276m/z	280.128	3.96272	Gly Phe Gly	C13H17N3O4	45.4	-5.66512	HILIC-POS
HMDB0001373	7.96_688.1548m/z	688.155	7.96447	Dephospho-CoA	C21H35N7O13P2S	45.4	-1.98281	HILIC-POS
HMDB0002067	11.00_749.2805m/z	749.28	11.0003	O-b-D-Gal-(1->3)-O-[O-b-D-Gal-(1->4)-2-(acetylamino)-2-deoxy-b-D-Glc-(1->6)]-2-(acetylamino)-2-deoxy- D-Galactose	C28H48N2O21	45.4	-2.37777	HILIC-POS
HMDB0014825	7.23_381.2109m/z	381.211	7.23368	Fludrocortisone	C21H29FO5	45.4	9.72418	HILIC-POS
HMDB0041121	9.45_291.0635m/z	291.063	9.45238	2-(4-Hydroxyphenyl)naphthalic anhydride	C18H10O4	45.4	-5.97736	HILIC-POS
HMDB0060661	6.35_619.2736m/z	619.274	6.35173	APC	C33H38N4O8	45.4	-4.33576	HILIC-POS
HMDB0000562	1.84_114.0658m/z	114.066	1.84252	Creatinine	C4H7N3O	45.5	-3.11304	HILIC-POS
HMDB0002250	1.23_344.2782m/z	344.278	1.23222	Dodecanoylcarnitine	C19H37NO4	45.5	-3.90545	HILIC-POS
HMDB0010391	1.20_550.3843m/z	550.384	1.20238	LysoPC(20:1(11Z))	C28H56NO7P	45.5	-4.37253	HILIC-POS
HMDB0010402	1.22_570.3534m/z	570.353	1.21722	LysoPC(22:5(4Z,7Z,10Z,13Z,16Z))	C30H52NO7P	45.5	-3.57222	HILIC-POS
HMDB0010618	0.75_775.5463m/z	775.546	0.750417	PG(18:1(11Z)/18:1(11Z))	C42H79O10P	45.5	-2.61315	HILIC-POS
HMDB0014638	2.53_268.1029m/z	268.103	2.53313	Zidovudine	C10H13N5O4	45.5	-4.11083	HILIC-POS
18801	10.54_377.1655m/z	377.166	10.5387	Gln Thr Glu	C14H24N4O8	45.6	-3.15017	HILIC-POS
214473	7.38_515.3284m/z	515.328	7.38367	Gln Val Leu Arg	C22H42N8O6	45.6	-3.03018	HILIC-POS
HMDB0030230	10.14_459.1458m/z	459.146	10.1362	2'-(E)-Feruloyl-3-(arabinosylxylose)	C20H26O12	45.6	-8.45253	HILIC-POS
HMDB0039386	11.35_491.2092m/z	491.209	11.3509	Cymorcin diglucoside	C22H34O12	45.6	-6.28562	HILIC-POS
23678	10.44_245.1123m/z	245.112	10.4427	Pro Glu	C10H16N2O5	45.7	-3.58498	HILIC-POS
HMDB0028695	4.89_187.1064m/z	187.106	4.89367	Alanyl-Proline	C8H14N2O3	45.7	-7.29346	HILIC-POS
HMDB0030643	11.84_331.0451m/z	331.045	11.8402	Blighinone	C16H10O8	45.7	0.654601	HILIC-POS
HMDB0033613	10.95_740.3541m/z	740.354	10.9516	Glabrin D	C36H49N7O10	45.7	-9.8159	HILIC-POS
18923	7.05_436.2286m/z	436.229	7.04953	Asn Phe Arg	C19H29N7O5	45.8	-3.96693	HILIC-POS
HMDB0011165	10.38_191.0652m/z	191.065	10.3808	L-beta-aspartyl-L-glycine	C6H10N2O5	45.8	-5.50326	HILIC-POS
HMDB0011496	1.31_526.2907m/z	526.291	1.30705	LysoPE(0:0/22:6(4Z,7Z,10Z,13Z,16Z,19Z))	C27H44NO7P	45.8	-3.9847	HILIC-POS
HMDB0038387	0.72_569.3783m/z	569.378	0.718583	33-Deoxy-33-hydroperoxyfurohyperforin	C35H52O6	45.8	-9.40498	HILIC-POS
HMDB0001248	9.87_786.1633m/z	786.163	9.87435	FAD	C27H33N9O15P2	45.9	-1.36782	HILIC-POS
HMDB0011152	1.26_438.2961m/z	438.296	1.26188	PE(P-16:0e/0:0)	C21H44NO6P	45.9	-4.05294	HILIC-POS
HMDB0060823	12.07_546.2019m/z	546.202	12.0747	Doxorubicinol aglycone	C27H31NO11	45.9	9.0321	HILIC-POS
HMDB0112718	0.81_840.5681m/z	840.568	0.81375	PS(22:0/18:4(6Z,9Z,12Z,15Z))	C46H82NO10P	45.9	-8.07238	HILIC-POS
15758	10.43_363.1496m/z	363.15	10.4278	Glu Gln Ser	C13H22N4O8	46	-3.85938	HILIC-POS
21027	9.10_333.1787m/z	333.179	9.09823	Gly Lys Glu	C13H24N4O6	46	5.40847	HILIC-POS
HMDB0000197	1.28_176.0695m/z	176.069	1.27705	Indoleacetic acid	C10H9NO2	46	-6.56713	HILIC-POS
HMDB0001325	10.65_189.1590m/z	189.159	10.6538	N6,N6,N6-Trimethyl-L-lysine	C9H20N2O2	46	-3.79654	HILIC-POS
HMDB0002366	2.72_244.1532m/z	244.153	2.71947	Tiglylcarnitine	C12H21NO4	46	-4.57653	HILIC-POS
HMDB0003464	6.75_146.0915m/z	146.091	6.74588	4-Guanidinobutanoic acid	C5H11N3O2	46	-6.33628	HILIC-POS
HMDB0010389	1.29_516.3039m/z	516.304	1.29172	LysoPC(18:4(6Z,9Z,12Z,15Z))	C26H46NO7P	46	-8.84101	HILIC-POS
HMDB0011173	9.25_189.0858m/z	189.086	9.25088	L-glycyl-L-hydroxyproline	C7H12N2O4	46	-6.0516	HILIC-POS
HMDB0028954	10.62_260.1959m/z	260.196	10.6213	Lysyl-Isoleucine	C12H25N3O3	46	-3.69617	HILIC-POS
HMDB0028964	10.68_246.1800m/z	246.18	10.6835	Lysyl-Valine	C11H23N3O3	46	-5.00376	HILIC-POS
HMDB0039100	3.43_361.1637m/z	361.164	3.42742	4-Acetylzearalenone	C20H24O6	46	-2.52435	HILIC-POS
19994	12.39_334.1232m/z	334.123	12.3852	Glu Glu Gly	C12H19N3O8	46.1	-3.75331	HILIC-POS
23647	4.01_229.1537m/z	229.154	4.01355	Pro Leu	C11H20N2O3	46.1	-4.35476	HILIC-POS
44294	11.43_219.0044m/z	219.004	11.4313	FOSFOSAL	C7H7O6P	46.1	-4.3484	HILIC-POS
HMDB0012097	1.17_675.5405m/z	675.541	1.17305	SM(d18:1/14:0)	C37H75N2O6P	46.1	-4.4584	HILIC-POS
HMDB0014567	3.47_242.0994m/z	242.099	3.47242	Methocarbamol	C11H15NO5	46.1	-11.8388	HILIC-POS
HMDB0035036	2.99_557.2224m/z	557.222	2.98978	Glaucarubolone 15-O-beta-D-glucopyranoside	C26H36O13	46.1	-0.85601	HILIC-POS
264888	11.21_483.2900m/z	483.29	11.2128	Ala Pro Ala Pro Lys	C22H38N6O6	46.2	-5.32497	HILIC-POS
HMDB0002096	1.20_204.1041m/z	204.104	1.20238	3-Indolebutyric acid	C12H13NO2	46.2	10.6182	HILIC-POS
HMDB0028833	7.20_276.1190m/z	276.119	7.20102	Glutamyl-Gamma-glutamate	C10H17N3O6	46.2	0.117533	HILIC-POS
HMDB0060173	10.86_156.0408m/z	156.041	10.8596	N-Methylethanolaminium phosphate	C3H10NO4P	46.2	-7.88864	HILIC-POS
HMDB0061690	2.64_621.3008m/z	621.301	2.63947	1-Arachidonoylglycerophosphoinositol	C29H49O12P	46.2	-4.20218	HILIC-POS
63401	8.60_348.0690m/z	348.069	8.59527	Adenosine 3'-monophosphate	C10H14N5O7P	46.3	-4.05641	HILIC-POS
HMDB0028732	6.28_246.1068m/z	246.107	6.28407	Asparaginyl-Hydroxyproline	C9H15N3O5	46.3	-6.86355	HILIC-POS
HMDB0059773	1.15_246.1511m/z	246.151	1.15355	S-3-oxodecanoyl cysteamine	C12H23NO2S	46.3	-4.68256	HILIC-POS
HMDB0062715	11.06_204.0862m/z	204.086	11.0618	N-acetyl-L-2-aminoadipate(2-)	C8H13NO5	46.3	-2.07086	HILIC-POS
HMDB0128732	7.23_270.0625m/z	270.062	7.23368	2-{[hydroxy(6-hydroxy-7-methoxy-2H-1,3-benzodioxol-5-yl)methylidene]amino}acetic acid	C11H11NO7	46.3	6.08283	HILIC-POS
18797	8.08_361.2062m/z	361.206	8.07563	Gln Thr Ile	C15H28N4O6	46.4	-5.35533	HILIC-POS
HMDB0001155	12.07_757.0865m/z	757.087	12.0747	Diadenosine triphosphate	C20H27N10O16P3	46.4	-3.55862	HILIC-POS
HMDB0003334	9.61_203.1498m/z	203.15	9.6142	Symmetric dimethylarginine	C8H18N4O2	46.4	-2.04317	HILIC-POS
HMDB0010404	1.22_568.3374m/z	568.337	1.21722	LysoPC(22:6(4Z,7Z,10Z,13Z,16Z,19Z))	C30H50NO7P	46.4	-4.16156	HILIC-POS
HMDB0038663	8.66_266.1219m/z	266.122	8.66243	D-1-[(3-Carboxypropyl)amino]-1-deoxyfructose	C10H19NO7	46.4	-5.64687	HILIC-POS
22207	8.38_317.2169m/z	317.217	8.38112	Val Lys Ala	C14H28N4O4	46.5	-4.6743	HILIC-POS
HMDB0035045	6.35_395.1655m/z	395.165	6.35173	Gibberellin A39	C20H26O8	46.5	-11.5647	HILIC-POS
HMDB0060750	6.80_242.1147m/z	242.115	6.79605	3'-Amino-3'-deoxythimidine	C10H15N3O4	46.5	4.71683	HILIC-POS
3377	6.65_247.1391m/z	247.139	6.64738	Octopine	C9H18N4O4	46.6	-3.89664	HILIC-POS
HMDB0004094	4.05_134.0586m/z	134.059	4.04688	Indoxyl	C8H7NO	46.6	-10.9829	HILIC-POS
HMDB0041541	10.46_337.1708m/z	337.171	10.4575	N2-Fructopyranosylarginine	C12H24N4O7	46.6	-2.87228	HILIC-POS
HMDB0060067	10.64_431.0707m/z	431.071	10.6375	CMP-2-aminoethylphosphonate	C11H20N4O10P2	46.6	-4.69234	HILIC-POS
HMDB0062734	9.28_317.0827m/z	317.083	9.28172	2-S-cysteinyl-DOPA	C12H16N2O6S	46.6	8.04257	HILIC-POS
HMDB0113934	6.90_782.5657m/z	782.566	6.89887	PE-NMe2(15:0/22:4(7Z,10Z,13Z,16Z))	C44H80NO8P	46.6	-4.77886	HILIC-POS
HMDB0125808	12.99_547.1781m/z	547.178	12.9942	6-{4-[3-(4,5-dihydroxy-7-methoxy-2,2-dimethyl-3,4-dihydro-2H-1-benzopyran-6-yl)-3-oxoprop-1-en-1-yl]phenoxy}-3,4,5-trihydroxyoxane-2-carboxylic acid	C27H30O12	46.6	-5.36321	HILIC-POS
16028	9.63_363.1972m/z	363.197	9.6297	Ser Arg Thr	C13H26N6O6	46.7	-3.91129	HILIC-POS
22270	12.21_375.2225m/z	375.222	12.2114	Val Lys Glu	C16H30N4O6	46.7	-3.58362	HILIC-POS
HMDB0008753	0.85_816.5916m/z	816.592	0.845583	PC(22:6(4Z,7Z,10Z,13Z,16Z,19Z)/P-18:1(11Z))	C48H82NO7P	46.7	1.80052	HILIC-POS
HMDB0009816	1.20_887.5611m/z	887.561	1.20238	PI(18:0/20:4(8Z,11Z,14Z,17Z))	C47H83O13P	46.7	-3.7434	HILIC-POS
HMDB0059614	9.87_439.0995m/z	439.099	9.87435	Riboflavin cyclic-4',5'-phosphate	C17H19N4O8P	46.7	-4.25634	HILIC-POS
HMDB0010385	1.23_522.3548m/z	522.355	1.23222	LysoPC(18:1(11Z))	C26H52NO7P	46.8	-1.14477	HILIC-POS
HMDB0029394	7.99_394.1262m/z	394.126	7.99397	gamma-L-Glutamyl-S-(2-carboxy-1-propyl)cysteinylglycine	C14H23N3O8S	46.8	-4.2049	HILIC-POS
HMDB0033304	7.77_365.1032m/z	365.103	7.77132	Gerberinol	C21H16O6	46.8	3.46425	HILIC-POS
HMDB0000897	1.92_166.0716m/z	166.072	1.91735	7-Methylguanine	C6H7N5O	46.9	-4.46903	HILIC-POS
HMDB0011353	0.89_724.5252m/z	724.525	0.8924	PE(P-16:0/20:4(8Z,11Z,14Z,17Z))	C41H74NO7P	46.9	-3.3024	HILIC-POS
HMDB0028995	4.13_223.1068m/z	223.107	4.12822	Phenylalanyl-Glycine	C11H14N2O3	46.9	-4.25628	HILIC-POS
HMDB0061693	2.69_599.3231m/z	599.323	2.6873	1-Oleoylglycerophosphoinositol	C27H51O12P	46.9	6.7132	HILIC-POS
HMDB0007883	6.90_754.5345m/z	754.535	6.89887	PC(14:0/20:4(5Z,8Z,11Z,14Z))	C42H76NO8P	47	-4.77377	HILIC-POS
HMDB0008911	0.80_752.5158m/z	752.516	0.797917	PE(15:0/22:5(4Z,7Z,10Z,13Z,16Z))	C42H74NO8P	47	-8.8878	HILIC-POS
16048	10.94_357.2487m/z	357.249	10.936	Ile Pro Lys	C17H32N4O4	47.1	-2.56042	HILIC-POS
20727	6.15_417.2440m/z	417.244	6.14542	Leu Arg Glu	C17H32N6O6	47.1	-3.79065	HILIC-POS
23735	7.60_257.1232m/z	257.123	7.59867	Thr His	C10H16N4O4	47.1	-4.66352	HILIC-POS
HMDB0002666	12.12_345.0764m/z	345.076	12.1197	Thiamine monophosphate	C12H17N4O4PS	47.1	-4.79628	HILIC-POS
HMDB0003045	5.70_230.0953m/z	230.095	5.69995	Ergothioneine	C9H15N3O2S	47.1	-2.0749	HILIC-POS
HMDB0133048	0.73_279.1583m/z	279.158	0.734917	2-[(3,3-dimethyloxiran-2-yl)methyl]-4-(3-methylbut-2-en-1-yl)benzene-1,3,5-triol	C16H22O4	47.1	-2.97877	HILIC-POS
264670	10.90_591.3080m/z	591.308	10.9049	Arg Thr Leu Ser Asp	C23H42N8O10	47.2	-2.81132	HILIC-POS
264998	5.88_602.3489m/z	602.349	5.88077	Leu Thr Gln Gln Leu	C26H47N7O9	47.2	-3.19674	HILIC-POS
HMDB0000881	8.45_206.0469m/z	206.047	8.4461	Xanthurenic acid	C10H7NO4	47.2	10.5201	HILIC-POS
HMDB0000884	12.32_259.0914m/z	259.091	12.3205	Ribothymidine	C10H14N2O6	47.2	-4.16184	HILIC-POS
HMDB0001273	14.39_523.9968m/z	523.997	14.3919	Guanosine triphosphate	C10H16N5O14P3	47.2	-2.2576	HILIC-POS
HMDB0013222	6.44_132.0764m/z	132.076	6.4434	Beta-Guanidinopropionic acid	C4H9N3O2	47.2	-2.3927	HILIC-POS
HMDB0014355	10.92_413.2113m/z	413.211	10.9201	Adapalene	C28H28O3	47.2	0.48724	HILIC-POS
HMDB0142450	3.43_345.1867m/z	345.187	3.42742	2-{4-[(1E)-1,2-diphenylbut-1-en-1-yl]phenoxy}ethan-1-ol	C24H24O2	47.2	5.09145	HILIC-POS
HMDB0002134	6.59_74.0592m/z	74.0592	6.5889	Aminoacetone	C3H7NO	47.3	-11.4629	HILIC-POS
HMDB0002194	2.89_264.0528m/z	264.053	2.88628	N-acetyl-S-(3-oxo-3-carboxy-n-propyl)cysteine	C9H13NO6S	47.3	-3.20569	HILIC-POS
HMDB0033675	7.20_219.1328m/z	219.133	7.20102	L-Lysopine	C9H18N2O4	47.3	-5.26827	HILIC-POS
HMDB0041364	1.38_367.1781m/z	367.178	1.38338	Secoeremopetasitolide A	C19H26O7	47.3	7.97595	HILIC-POS
21334	8.60_303.2015m/z	303.201	8.59527	Val Lys Gly	C13H26N4O4	47.4	-3.94212	HILIC-POS
HMDB0002039	7.15_86.0591m/z	86.0591	7.15085	2-Pyrrolidinone	C4H7NO	47.4	-11.3475	HILIC-POS
HMDB0010387	1.28_518.3195m/z	518.319	1.27705	LysoPC(18:3(6Z,9Z,12Z))	C26H48NO7P	47.4	-8.9845	HILIC-POS
HMDB0034126	0.83_297.0747m/z	297.075	0.829417	Gyrocyanin	C17H12O5	47.4	-3.62035	HILIC-POS
HMDB0240262	0.89_496.3382m/z	496.338	0.8924	LysoPC(0:0/16:0)	C24H50NO7P	47.4	-3.12574	HILIC-POS
HMDB0000321	3.56_163.0587m/z	163.059	3.56158	2-Hydroxyadipic acid	C6H10O5	47.5	-8.69219	HILIC-POS
HMDB0029031	8.24_244.1280m/z	244.128	8.24378	Prolyl-Gamma-glutamate	C10H17N3O4	47.5	-5.04201	HILIC-POS
HMDB0034301	3.43_86.0961m/z	86.0961	3.42742	Piperidine	C5H11N	47.5	-4.23602	HILIC-POS
HMDB0059635	9.39_536.1026m/z	536.103	9.38905	Lipoyl-AMP	C18H26N5O8PS2	47.5	-1.28823	HILIC-POS
HMDB0128629	7.63_367.0647m/z	367.065	7.63032	3,4,5-trihydroxy-6-(1-oxo-1H-isochromene-3-carbonyloxy)oxane-2-carboxylic acid	C16H14O10	47.5	-3.56466	HILIC-POS
17190	12.94_391.1808m/z	391.181	12.944	Glu Asp Lys	C15H26N4O8	47.6	-4.03361	HILIC-POS
HMDB0000300	1.83_113.0333m/z	113.033	1.82735	Uracil	C4H4N2O2	47.6	-11.2102	HILIC-POS
HMDB0015200	9.60_446.1852m/z	446.185	9.59887	Glipizide	C21H27N5O4S	47.6	-1.07942	HILIC-POS
HMDB0028945	13.06_303.2125m/z	303.212	13.0613	Lysyl-Arginine	C12H26N6O3	47.6	-4.78149	HILIC-POS
HMDB0037844	6.28_280.1377m/z	280.138	6.28407	N-(1-Deoxy-1-fructosyl)valine	C11H21NO7	47.6	-4.86598	HILIC-POS
HMDB0059653	13.65_464.0800m/z	464.08	13.6479	N(6)-(1,2-dicarboxyethyl)AMP	C14H18N5O11P	47.6	-2.82699	HILIC-POS
17070	6.70_334.1354m/z	334.135	6.69555	Ser Asn Asn	C11H19N5O7	47.7	-0.994147	HILIC-POS
23643	8.65_253.1283m/z	253.128	8.6456	Pro His	C11H16N4O3	47.7	-4.9984	HILIC-POS
HMDB0061698	2.14_526.3115m/z	526.312	2.13983	1-Stearoylglycerophosphoserine	C24H48NO9P	47.7	-4.57651	HILIC-POS
16539	12.79_419.1867m/z	419.187	12.7945	Asp Glu Arg	C15H26N6O8	47.8	-4.25121	HILIC-POS
23549	8.41_432.2556m/z	432.256	8.41362	Glu Lys Arg	C17H33N7O6	47.8	-2.08978	HILIC-POS
HMDB0000201	4.76_204.1229m/z	204.123	4.75517	L-Acetylcarnitine	C9H17NO4	47.8	-0.604552	HILIC-POS
HMDB0000767	11.20_245.0789m/z	245.079	11.1969	Pseudouridine	C9H12N2O6	47.8	8.69577	HILIC-POS
HMDB0001201	13.81_444.0300m/z	444.03	13.8054	Guanosine diphosphate	C10H15N5O11P2	47.8	-3.70972	HILIC-POS
HMDB0001489	10.27_231.0253m/z	231.025	10.2667	Ribose 1-phosphate	C5H11O8P	47.8	-5.08243	HILIC-POS
HMDB0002201	6.28_176.0905m/z	176.091	6.28407	N-Carboxyethyl-g-aminobutyric acid	C7H13NO4	47.8	-7.00905	HILIC-POS
HMDB0012168	0.73_429.3711m/z	429.371	0.734917	4alpha-Formyl-4beta-methyl-5alpha-cholesta-8-en-3beta-ol	C29H48O2	47.8	-3.65183	HILIC-POS
HMDB0013220	13.39_322.0767m/z	322.077	13.3853	Beta-Citryl-L-glutamic acid	C11H15NO10	47.8	-0.469214	HILIC-POS
HMDB0005768	6.93_338.1809m/z	338.181	6.9322	Kyotorphin	C15H23N5O4	47.9	-3.97634	HILIC-POS
HMDB0029418	11.77_238.0367m/z	238.037	11.7677	S-Cysteinosuccinic acid	C7H11NO6S	47.9	-5.48303	HILIC-POS
145	11.84_261.0358m/z	261.036	11.8402	D-Glucose 6-phosphate	C6H13O9P	48	-4.70784	HILIC-POS
40878	1.15_511.3025m/z	511.303	1.15355	PG(18:1(9Z)/0:0)	C24H47O9P	48	-1.02983	HILIC-POS
45035	8.11_110.0705m/z	110.07	8.10763	4-Pyrimidine Methanamine (hydrochloride)	C5H7N3	48	-7.19939	HILIC-POS
220987	0.77_518.3073m/z	518.307	0.765917	Arg Gln Ser Lys	C20H39N9O7	48	5.38814	HILIC-POS
HMDB0028817	10.67_276.1181m/z	276.118	10.6688	Glutamylglutamine	C10H17N3O6	48	-3.41973	HILIC-POS
HMDB0061717	9.71_262.1287m/z	262.129	9.7057	Succinylcarnitine	C11H19NO6	48	0.623078	HILIC-POS
21447	7.15_316.2217m/z	316.222	7.15085	Ala Leu Leu	C15H29N3O4	48.1	-4.40313	HILIC-POS
215747	0.75_502.3129m/z	502.313	0.750417	Arg Ala Gln Lys	C20H39N9O6	48.1	6.62825	HILIC-POS
HMDB0000052	12.18_291.1296m/z	291.13	12.1807	Argininosuccinic acid	C10H18N4O6	48.1	-1.00615	HILIC-POS
HMDB0010384	1.22_524.3667m/z	524.367	1.21722	LysoPC(18:0)	C26H54NO7P	48.1	-8.35048	HILIC-POS
HMDB0034887	11.05_168.0644m/z	168.064	11.0471	3alpha,4,5,7alpha-Tetrahydro-5-hydroxy-1H-isoindole-1,3(2H)-dione	C8H9NO3	48.1	-6.53234	HILIC-POS
44784	9.60_198.0861m/z	198.086	9.59887	N-Acetyl-L-Histidine	C8H11N3O3	48.2	-5.92612	HILIC-POS
HMDB0001067	11.80_305.0967m/z	305.097	11.7967	N-Acetylaspartylglutamic acid	C11H16N2O8	48.2	-3.97934	HILIC-POS
HMDB0001128	6.40_230.0439m/z	230.044	6.39923	5-Phosphoribosylamine	C5H12NO7P	48.2	6.53436	HILIC-POS
HMDB0001514	4.83_180.0855m/z	180.085	4.8315	Glucosamine	C6H13NO5	48.2	-6.56871	HILIC-POS
HMDB0034684	3.35_234.1508m/z	234.151	3.35142	Thalictroidine	C14H19NO2	48.2	8.54719	HILIC-POS
HMDB0000195	2.42_269.0868m/z	269.087	2.41532	Inosine	C10H12N4O5	48.3	-4.77259	HILIC-POS
HMDB0001190	2.20_160.0746m/z	160.075	2.20317	Indoleacetaldehyde	C10H9NO	48.3	-6.71683	HILIC-POS
HMDB0062557	8.41_162.0749m/z	162.075	8.41362	N-Acetylthreonine	C6H11NO4	48.3	-7.28625	HILIC-POS
HMDB0009824	1.23_863.5616m/z	863.562	1.23222	PI(18:1(11Z)/18:1(11Z))	C45H83O13P	48.4	-3.23096	HILIC-POS
HMDB0028725	9.61_289.1608m/z	289.161	9.6142	Asparaginyl-Arginine	C10H20N6O4	48.4	-3.68153	HILIC-POS
HMDB0032645	8.21_425.1126m/z	425.113	8.21328	3-Glucosyl-2,3',4,4',6-pentahydroxybenzophenone	C19H20O11	48.4	11.1654	HILIC-POS
HMDB0028829	10.09_249.1068m/z	249.107	10.089	Glutamylthreonine	C9H16N2O6	48.5	-5.23836	HILIC-POS
HMDB0037839	7.71_318.1283m/z	318.128	7.71082	N-(1-Deoxy-1-fructosyl)histidine	C12H19N3O7	48.5	-4.1111	HILIC-POS
HMDB0000244	2.06_377.1443m/z	377.144	2.0595	Riboflavin	C17H20N4O6	48.6	-3.27402	HILIC-POS
HMDB0001511	11.61_212.0421m/z	212.042	11.6092	Phosphocreatine	C4H10N3O5P	48.6	-4.49556	HILIC-POS
HMDB0006699	11.97_708.2533m/z	708.253	11.9714	Alpha-D-Manp-(1 -> 2)-a-D-Manp-(1 -> 2)-a-D-Manp-(1 -> 3)-b-D-Manp-(1 -> 4)-D-GlcNAcp	C26H45NO21	48.6	-3.32278	HILIC-POS
HMDB0011507	1.35_478.2909m/z	478.291	1.35288	LysoPE(18:2(9Z,12Z)/0:0)	C23H44NO7P	48.6	-3.91285	HILIC-POS
HMDB0032659	6.65_233.0434m/z	233.043	6.64738	4-Hydroxy-8-methoxy-2H-furo[2,3-h]-1-benzopyran-2-one	C12H8O5	48.6	-4.45877	HILIC-POS
HMDB0061715	4.13_162.0749m/z	162.075	4.12822	Glutamate, gamma-methyl ester	C6H11NO4	48.6	-7.08854	HILIC-POS
16525	9.41_363.1860m/z	363.186	9.40522	Glu Lys Ser	C14H26N4O7	48.7	-4.00298	HILIC-POS
21639	8.60_374.2381m/z	374.238	8.59527	Lys Ile Asn	C16H31N5O5	48.7	-4.51497	HILIC-POS
HMDB0001367	10.65_302.0623m/z	302.062	10.6538	N-Acetyl-glucosamine 1-phosphate	C8H16NO9P	48.7	-4.22025	HILIC-POS
HMDB0029389	1.69_136.0613m/z	136.061	1.68685	(+)-threo-2-Amino-3,4-dihydroxybutanoic acid	C4H9NO4	48.7	6.04075	HILIC-POS
HMDB0031876	1.20_249.1333m/z	249.133	1.20238	Prenyl glucoside	C11H20O6	48.7	0.0546652	HILIC-POS
HMDB0060427	6.23_86.0592m/z	86.0592	6.23258	Acetone cyanohydrin	C4H7NO	48.7	-9.6219	HILIC-POS
16651	7.42_375.2332m/z	375.233	7.417	Ser Ile Arg	C15H30N6O5	48.8	-4.83261	HILIC-POS
21366	8.09_331.2080m/z	331.208	8.0918	Gly Val Arg	C13H26N6O4	48.8	-2.58315	HILIC-POS
HMDB0003514	14.22_341.0021m/z	341.002	14.2209	Alpha-D-Glucose 1,6-bisphosphate	C6H14O12P2	48.8	-3.729	HILIC-POS
20897	11.21_301.1855m/z	301.186	11.2128	Gly Pro Lys	C13H24N4O4	48.9	-5.09024	HILIC-POS
21169	8.63_361.1821m/z	361.182	8.62893	Gly Glu Arg	C13H24N6O6	48.9	-2.51613	HILIC-POS
21550	3.83_389.2380m/z	389.238	3.8279	Glu Leu Lys	C17H32N4O6	48.9	-3.75717	HILIC-POS
22171	1.72_488.2271m/z	488.227	1.71818	Trp Pro Trp	C27H29N5O4	48.9	-4.3422	HILIC-POS
HMDB0001406	1.17_123.0545m/z	123.055	1.17305	Niacinamide	C6H6N2O	48.9	-6.36311	HILIC-POS
HMDB0005065	1.15_426.3561m/z	426.356	1.15355	Oleoylcarnitine	C25H47NO4	48.9	-4.04265	HILIC-POS
HMDB0028689	8.53_227.1127m/z	227.113	8.52843	Alanyl-Histidine	C9H14N4O3	48.9	-5.2385	HILIC-POS
HMDB0029440	1.75_162.0571m/z	162.057	1.74952	trans-S-(1-Propenyl)-L-cysteine	C6H11NO2S	48.9	-7.39561	HILIC-POS
HMDB0040722	12.00_389.1196m/z	389.12	12.0007	7-Hydroxy-3',4',5,6,8-pentamethoxyflavone	C20H20O8	48.9	-9.12195	HILIC-POS
17915	9.58_375.2223m/z	375.222	9.58387	Asp Ile Lys	C16H30N4O6	49	-4.01501	HILIC-POS
HMDB0000812	9.41_176.0543m/z	176.054	9.40522	N-Acetyl-L-aspartic acid	C6H9NO5	49	-6.04637	HILIC-POS
HMDB0010379	1.34_468.3072m/z	468.307	1.33738	LysoPC(14:0/0:0)	C22H46NO7P	49	-2.69828	HILIC-POS
HMDB0011599	2.74_150.0758m/z	150.076	2.73563	1-Methyladenine	C6H7N5	49	-10.7539	HILIC-POS
HMDB0060814	4.21_679.4377m/z	679.438	4.20937	Descladinose roxithromycin	C33H62N2O12	49	0.18108	HILIC-POS
17126	9.61_378.1147m/z	378.115	9.6142	Glu Asp Asp	C13H19N3O10	49.1	1.01064	HILIC-POS
19396	12.84_433.2024m/z	433.202	12.8443	Glu Arg Glu	C16H28N6O8	49.1	-4.11066	HILIC-POS
23807	4.00_189.1220m/z	189.122	3.99672	Ile Gly	C8H16N2O3	49.1	-7.26489	HILIC-POS
HMDB0005831	11.41_263.0509m/z	263.051	11.4149	Sorbitol-6-phosphate	C6H15O9P	49.1	-6.7182	HILIC-POS
HMDB0010382	1.26_496.3390m/z	496.339	1.26188	LysoPC(16:0)	C24H50NO7P	49.1	-1.48974	HILIC-POS
23945	3.98_203.1378m/z	203.138	3.97972	Ala Leu	C9H18N2O3	49.2	-6.23184	HILIC-POS
HMDB0014533	7.00_187.0555m/z	187.055	6.99853	Carbimazole	C7H10N2O2S	49.2	10.3375	HILIC-POS
HMDB0028773	10.41_250.0852m/z	250.085	10.413	Cysteinyl-Glutamine	C8H15N3O4S	49.2	-1.79088	HILIC-POS
HMDB0059815	3.72_159.0640m/z	159.064	3.7234	Ethyl 5-oxotetrahydro-2-furancarboxylate	C7H10O4	49.2	-7.59272	HILIC-POS
3425	11.23_298.0959m/z	298.096	11.2276	5â€²-Deoxy-5â€²-<WBR>(methylthio)adenosine	C11H15N5O3S	49.3	-3.19622	HILIC-POS
22008	7.66_375.2336m/z	375.234	7.66315	Thr Val Arg	C15H30N6O5	49.3	-3.82954	HILIC-POS
HMDB0000734	3.02_188.0704m/z	188.07	3.01912	Indoleacrylic acid	C11H9NO2	49.3	-1.24512	HILIC-POS
HMDB0000756	1.96_260.1850m/z	260.185	1.96433	L-Hexanoylcarnitine	C13H25NO4	49.3	-2.30588	HILIC-POS
HMDB0059660	8.32_216.0630m/z	216.063	8.31962	sn-glycero-3-Phosphoethanolamine	C5H14NO6P	49.3	-0.842178	HILIC-POS
16013	8.53_395.2014m/z	395.201	8.52843	Gly Tyr Arg	C17H26N6O5	49.4	-6.05553	HILIC-POS
17272	8.14_375.1978m/z	375.198	8.1383	Glu Ala Arg	C14H26N6O6	49.4	-2.38991	HILIC-POS
HMDB0000056	7.00_90.0542m/z	90.0542	6.99853	beta-Alanine	C3H7NO2	49.4	-8.83589	HILIC-POS
HMDB0000567	2.96_149.0584m/z	149.058	2.96045	Cinnamic acid	C9H8O2	49.4	-9.12578	HILIC-POS
HMDB0001520	9.23_457.1102m/z	457.11	9.23388	Flavin Mononucleotide	C17H21N4O9P	49.4	-3.69891	HILIC-POS
HMDB0010397	1.25_542.3221m/z	542.322	1.24722	LysoPC(20:5(5Z,8Z,11Z,14Z,17Z))	C28H48NO7P	49.4	-3.66418	HILIC-POS
HMDB0014823	6.28_417.1123m/z	417.112	6.28407	Trovafloxacin	C20H15F3N4O3	49.4	-11.1493	HILIC-POS
HMDB0015109	11.83_293.0976m/z	293.098	11.8257	Edetic Acid	C10H16N2O8	49.4	-1.02504	HILIC-POS
HMDB0003357	6.88_175.1067m/z	175.107	6.88137	N-Acetylornithine	C7H14N2O3	49.5	-5.85666	HILIC-POS
HMDB0011474	1.40_452.2754m/z	452.275	1.39922	LysoPE(0:0/16:1(9Z))	C21H42NO7P	49.5	-3.90297	HILIC-POS
HMDB0028802	10.44_275.1701m/z	275.17	10.4427	Glutaminyllysine	C11H22N4O4	49.5	-4.84346	HILIC-POS
HMDB0040241	10.68_197.0993m/z	197.099	10.6835	1-(2-Thienyl)-1-heptanone	C11H16OS	49.5	-0.871693	HILIC-POS
HMDB0060842	7.95_281.0943m/z	281.094	7.94997	N-Despyridinyl rosiglitazone	C13H16N2O3S	49.5	-4.24162	HILIC-POS
HMDB0124984	3.38_315.1095m/z	315.11	3.38142	6-(4-ethyl-2-hydroxyphenoxy)-3,4,5-trihydroxyoxane-2-carboxylic acid	C14H18O8	49.5	6.67123	HILIC-POS
HMDB0133147	11.87_413.0341m/z	413.034	11.8692	[2,6-dihydroxy-4-({[3,4,5-trihydroxy-6-(hydroxymethyl)oxan-2-yl]oxy}carbonyl)phenyl]oxidanesulfonic acid	C13H16O13S	49.5	-10.411	HILIC-POS
17511	9.53_383.2383m/z	383.238	9.52503	His Val Lys	C17H30N6O4	49.6	-4.74403	HILIC-POS
22044	8.96_391.1916m/z	391.192	8.9634	Arg Ser Glu	C14H26N6O7	49.6	-5.04738	HILIC-POS
HMDB0006552	0.81_313.0706m/z	313.071	0.81375	Aflatoxin B1	C17H12O6	49.6	-0.324674	HILIC-POS
HMDB0011690	13.26_180.0866m/z	180.087	13.2618	7-Aminomethyl-7-carbaguanine	C7H9N5O	49.6	-7.46451	HILIC-POS
HMDB0029447	10.09_234.1443m/z	234.144	10.089	Lysinoalanine	C9H19N3O4	49.6	-2.43088	HILIC-POS
HMDB0059711	3.78_137.0705m/z	137.071	3.78373	2-Methylnicotinamide	C7H8N2O	49.6	-3.20121	HILIC-POS
22538	11.02_388.2905m/z	388.291	11.0163	Ile Lys Lys	C18H37N5O4	49.7	-3.43072	HILIC-POS
HMDB0000182	11.15_147.1122m/z	147.112	11.1508	L-Lysine	C6H14N2O2	49.7	-4.20266	HILIC-POS
HMDB0001466	1.14_138.0900m/z	138.09	1.13657	Dimethylaniline-N-oxide	C8H11NO	49.7	-9.65637	HILIC-POS
HMDB0039655	2.93_180.1007m/z	180.101	2.93095	1,2,3,4,5,6-Hexahydro-5-(1-hydroxyethylidene)-7H-cyclopenta[b]pyridin-7-one	C10H13NO2	49.7	-6.98086	HILIC-POS
HMDB0062636	13.26_425.0426m/z	425.043	13.2618	Thiamine(1+) Diphosphate(1-)	C12H18N4O7P2S	49.7	-4.35125	HILIC-POS
HMDB0132728	10.43_515.0500m/z	515.05	10.4278	[5-(3-{[3,4-dihydroxy-5-(hydroxymethyl)oxolan-2-yl]oxy}-5,7-dihydroxy-4-oxo-4H-chromen-2-yl)-2-hydroxyphenyl]oxidanesulfonic acid	C20H18O14S	49.7	1.92641	HILIC-POS
HMDB0002013	2.89_232.1545m/z	232.154	2.88628	Butyrylcarnitine	C11H21NO4	49.8	0.611205	HILIC-POS
HMDB0011649	10.79_335.0727m/z	335.073	10.7858	1-(sn-Glycero-3-phospho)-1D-myo-inositol	C9H19O11P	49.8	-3.1526	HILIC-POS
HMDB0028835	10.64_232.1393m/z	232.139	10.6375	Glycyl-Arginine	C8H17N5O3	49.8	-4.7463	HILIC-POS
HMDB0033649	6.66_277.0699m/z	277.07	6.66388	O-Demethylfonsecin	C14H12O6	49.8	-2.68905	HILIC-POS
HMDB0038057	1.46_316.2832m/z	316.283	1.46137	Dehydrophytosphingosine	C18H37NO3	49.8	-4.40291	HILIC-POS
HMDB0004953	1.10_648.6256m/z	648.626	1.10373	Cer(d18:1/24:1(15Z))	C42H81NO3	49.9	-5.18056	HILIC-POS
HMDB0011212	7.37_740.5531m/z	740.553	7.36683	PC(P-16:0/18:3(6Z,9Z,12Z))	C42H78NO7P	49.9	-7.79629	HILIC-POS
HMDB0011741	8.65_311.1227m/z	311.123	8.6456	gamma-Glutamyltyrosine	C14H18N2O6	49.9	-3.50374	HILIC-POS
HMDB0028733	8.58_270.1183m/z	270.118	8.57843	Asparaginyl-Histidine	C10H15N5O4	49.9	-5.11983	HILIC-POS
HMDB0038493	6.62_278.1233m/z	278.123	6.61805	N-(1-Deoxy-1-fructosyl)proline	C11H19NO7	49.9	-0.451768	HILIC-POS
HMDB0000790	1.10_538.5173m/z	538.517	1.10373	N-Palmitoylsphingosine	C34H67NO3	50	-3.93525	HILIC-POS
HMDB0014447	3.35_158.1165m/z	158.117	3.35142	Tranexamic Acid	C8H15NO2	50	-6.41993	HILIC-POS
HMDB0129407	5.40_397.0787m/z	397.079	5.3993	3,4,5-trihydroxy-6-{[2-(4-methoxy-1-benzofuran-5-yl)-2-oxoacetyl]oxy}oxane-2-carboxylic acid	C17H16O11	50	5.40702	HILIC-POS
19155	7.70_317.2171m/z	317.217	7.69515	Ile Gly Lys	C14H28N4O4	50.1	-3.74333	HILIC-POS
HMDB0029681	10.77_339.1065m/z	339.107	10.7711	3-O-p-Coumaroylquinic acid	C16H18O8	50.1	-2.75925	HILIC-POS
HMDB0031641	4.56_72.0800m/z	72.08	4.55518	Pyrrolidine	C4H9N	50.1	-10.5256	HILIC-POS
23003	12.12_333.1757m/z	333.176	12.1197	Gln Ser Val	C13H24N4O6	50.2	-3.5757	HILIC-POS
HMDB0003331	1.48_282.1177m/z	282.118	1.47703	1-Methyladenosine	C11H15N5O4	50.2	-6.96467	HILIC-POS
HMDB0003411	4.76_116.0703m/z	116.07	4.75517	D-Proline	C5H9NO2	50.2	-2.97711	HILIC-POS
HMDB0006592	9.89_546.2008m/z	546.201	9.89018	Lacto-N-triaose	C20H35NO16	50.2	-3.78932	HILIC-POS
HMDB0029106	7.38_295.1278m/z	295.128	7.38367	Tyrosyl-Hydroxyproline	C14H18N2O5	50.2	-3.50651	HILIC-POS
HMDB0041208	4.69_362.1429m/z	362.143	4.69383	De-O-methylsimmondsin	C15H23NO9	50.2	-4.48888	HILIC-POS
HMDB0059600	12.91_243.0728m/z	243.073	12.9105	5-phosphonooxy-L-lysine	C6H15N2O6P	50.2	-5.35579	HILIC-POS
4237	1.72_194.0802m/z	194.08	1.71818	Phenylacetylglycine	C10H11NO3	50.3	-4.87898	HILIC-POS
HMDB0000651	1.35_316.2470m/z	316.247	1.35288	Decanoylcarnitine	C17H33NO4	50.3	-3.92768	HILIC-POS
HMDB0010395	1.23_544.3373m/z	544.337	1.23222	LysoPC(20:4(5Z,8Z,11Z,14Z))	C28H50NO7P	50.3	-4.59036	HILIC-POS
HMDB0014581	1.81_137.0453m/z	137.045	1.81268	Allopurinol	C5H4N4O	50.3	-3.5583	HILIC-POS
HMDB0029154	11.46_276.1541m/z	276.154	11.4641	gamma-Glutamyllysine	C11H21N3O5	50.3	-4.58403	HILIC-POS
HMDB0032420	6.28_172.0445m/z	172.045	6.28407	2-(4-Methyl-5-thiazolyl)ethyl formate	C7H9NO2S	50.3	10.6866	HILIC-POS
56	2.47_104.1068m/z	104.107	2.47498	Choline	C5H13NO	50.4	-1.88741	HILIC-POS
19613	6.90_390.1764m/z	390.176	6.89887	Ala His Tyr	C18H23N5O5	50.4	-2.06142	HILIC-POS
HMDB0000175	10.32_349.0536m/z	349.054	10.3156	Inosinic acid	C10H13N4O8P	50.4	-2.29842	HILIC-POS
HMDB0003337	13.88_613.1595m/z	613.159	13.8799	Oxidized glutathione	C20H32N6O12S2	50.4	0.415599	HILIC-POS
HMDB0004827	6.86_144.1010m/z	144.101	6.8637	Proline betaine	C7H13NO2	50.4	-6.49692	HILIC-POS
HMDB0028692	10.33_218.1489m/z	218.149	10.3318	Alanyl-Lysine	C9H19N3O3	50.4	-4.62791	HILIC-POS
HMDB0029050	3.71_292.1280m/z	292.128	3.70857	Seryltryptophan	C14H17N3O4	50.4	-4.10711	HILIC-POS
HMDB0126448	9.06_517.2226m/z	517.223	9.0644	2-(6-{2,4-dihydroxy-3-[(1E)-3-methylbut-1-en-1-yl]benzoyl}-5-(2,4-dihydroxyphenyl)-3-methylcyclohex-2-en-1-yl)benzene-1,3-diol	C31H32O7	50.4	0.973454	HILIC-POS
17928	7.40_385.2543m/z	385.254	7.40052	Ile Pro Arg	C17H32N6O4	50.5	-3.75456	HILIC-POS
HMDB0000062	6.56_162.1125m/z	162.112	6.55988	L-Carnitine	C7H15NO3	50.5	-0.0341107	HILIC-POS
HMDB0000517	10.71_175.1190m/z	175.119	10.7126	L-Arginine	C6H14N4O2	50.5	0.0282615	HILIC-POS
HMDB0010383	1.29_494.3230m/z	494.323	1.29172	LysoPC(16:1(9Z)/0:0)	C24H48NO7P	50.5	-2.23903	HILIC-POS
HMDB0060244	10.77_170.0565m/z	170.056	10.7711	Phosphodimethylethanolamine	C4H12NO4P	50.5	-6.99882	HILIC-POS
17786	8.86_437.2119m/z	437.212	8.86308	Asp Phe Arg	C19H28N6O6	50.6	-5.55762	HILIC-POS
HMDB0001901	3.43_132.1015m/z	132.102	3.42742	Aminocaproic acid	C6H13NO2	50.6	-3.07851	HILIC-POS
HMDB0012267	8.37_291.1173m/z	291.117	8.36528	N-Succinyl-L,L-2,6-diaminopimelate	C11H18N2O7	50.6	-4.80499	HILIC-POS
HMDB0029135	6.18_215.1375m/z	215.138	6.18008	Valyl-Proline	C10H18N2O3	50.6	-6.92386	HILIC-POS
HMDB0127628	1.37_930.5469m/z	930.547	1.36838	(1R,16Z,24E,26E,28Z)-12-[1-(3,4-dihydroxy-5-methoxycyclohexyl)propan-2-yl]-1,18-dihydroxy-19,30-dimethoxy-15,17,21,23,29,35-hexamethyl-11,36-dioxa-4-azatricyclo[30.3.1.0â´,â¹]hexatriaconta-16,24,26,28-tetraene-2,3,10,14,20-pentone	C51H79NO14	50.6	-11.2712	HILIC-POS
HMDB0130027	1.80_295.0650m/z	295.065	1.79735	6-(1-carboxy-2-methoxy-2-oxoethyl)-3,4,5-trihydroxyoxane-2-carboxylic acid	C10H14O10	50.6	-3.35834	HILIC-POS
17300	8.17_347.2276m/z	347.228	8.16845	Val Thr Lys	C15H30N4O5	50.7	-3.75952	HILIC-POS
43545	7.70_160.1330m/z	160.133	7.69515	METHACHOLINE	C8H17NO2	50.7	-1.40946	HILIC-POS
44990	7.46_110.0709m/z	110.071	7.4625	2-Aminomethylpyrimidine (hydrochloride)	C5H7N3	50.7	-3.15386	HILIC-POS
HMDB0000263	11.52_168.9886m/z	168.989	11.5228	Phosphoenolpyruvic acid	C3H5O6P	50.7	-6.28329	HILIC-POS
HMDB0000378	2.40_246.1699m/z	246.17	2.40065	2-Methylbutyroylcarnitine	C12H23NO4	50.7	-0.366295	HILIC-POS
HMDB0001178	10.80_560.0770m/z	560.077	10.8005	Adenosine diphosphate ribose	C15H23N5O14P2	50.7	-3.51403	HILIC-POS
HMDB0003339	12.55_148.0593m/z	148.059	12.5464	D-Glutamic acid	C5H9NO4	50.7	-7.66716	HILIC-POS
HMDB0011505	1.34_480.3071m/z	480.307	1.33738	LysoPE(18:1(11Z)/0:0)	C23H46NO7P	50.7	-2.80086	HILIC-POS
HMDB0015068	13.42_387.1525m/z	387.152	13.4156	Mesoridazine	C21H26N2OS2	50.7	-8.88883	HILIC-POS
HMDB0015186	1.20_335.1045m/z	335.104	1.20238	Penicillin G	C16H18N2O4S	50.7	-4.54447	HILIC-POS
HMDB0028681	9.75_246.1548m/z	246.155	9.7497	Alanyl-Arginine	C9H19N5O3	50.7	-5.03641	HILIC-POS
HMDB0031682	3.81_104.0519m/z	104.052	3.81323	(Â±)-2-Methylthiazolidine	C4H9NS	50.7	-8.93876	HILIC-POS
HMDB0060617	2.81_353.1158m/z	353.116	2.81295	Penicilloic acid	C16H20N2O5S	50.7	-2.17464	HILIC-POS
18561	4.99_373.2793m/z	373.279	4.99248	Ile Lys Ile	C18H36N4O4	50.8	-4.38134	HILIC-POS
127642	12.75_462.2177m/z	462.218	12.745	Glu Ala Lys Asp	C18H31N5O9	50.8	-3.89414	HILIC-POS
264601	8.78_516.3124m/z	516.312	8.77975	Leu Asn Ala Ala Lys	C22H41N7O7	50.8	-3.15434	HILIC-POS
HMDB0004980	13.70_640.0431m/z	640.043	13.6978	cis-4-Decenoic acid	C15H24N5O17P3	50.8	-3.3535	HILIC-POS
HMDB0028768	6.90_193.0632m/z	193.063	6.89887	Cysteinyl-Alanine	C6H12N2O3S	50.8	-4.71802	HILIC-POS
HMDB0028883	6.68_284.1327m/z	284.133	6.67905	Histidinyl-Glutamine	C11H17N5O4	50.8	-9.32245	HILIC-POS
HMDB0029395	9.06_322.1056m/z	322.106	9.0644	L-L-Homoglutathione	C11H19N3O6S	50.8	-3.48861	HILIC-POS
22218	7.58_389.2127m/z	389.213	7.58283	Asp Arg Val	C15H28N6O6	50.9	-4.24338	HILIC-POS
HMDB0000076	6.03_115.0489m/z	115.049	6.02708	Dihydrouracil	C4H6N2O2	50.9	-11.8127	HILIC-POS
HMDB0000939	8.06_385.1278m/z	385.128	8.0593	S-Adenosylhomocysteine	C14H20N6O5S	50.9	-2.8581	HILIC-POS
HMDB0001095	11.91_590.0876m/z	590.088	11.9129	GDP-L-fucose	C16H25N5O15P2	50.9	-3.28285	HILIC-POS
HMDB0001397	11.00_364.0642m/z	364.064	11.0003	Guanosine monophosphate	C10H14N5O8P	50.9	-3.07323	HILIC-POS
HMDB0002172	10.86_287.2428m/z	287.243	10.8596	N1,N12-Diacetylspermine	C14H30N4O2	50.9	-4.63667	HILIC-POS
HMDB0005036	6.93_501.1974m/z	501.197	6.9322	Fluticasone propionate	C25H31F3O5S	50.9	11.3423	HILIC-POS
HMDB0061711	8.29_112.9989m/z	112.999	8.28978	Methylphosphate	CH5O4P	50.9	-8.17442	HILIC-POS
HMDB0001176	11.51_615.1532m/z	615.153	11.5083	Cytidine monophosphate N-acetylneuraminic acid	C20H31N4O16P	51	-2.17199	HILIC-POS
HMDB0004610	1.41_318.2989m/z	318.299	1.4147	Phytosphingosine	C18H39NO3	51	-4.39106	HILIC-POS
HMDB0015301	10.67_199.1905m/z	199.191	10.6688	Guanethidine	C10H22N4	51	-6.098	HILIC-POS
HMDB0032628	4.68_136.0751m/z	136.075	4.67833	2-Aminoacetophenone	C8H9NO	51	-4.39977	HILIC-POS
HMDB0041454	0.73_391.2839m/z	391.284	0.734917	D8'-Merulinic acid A	C24H38O4	51	-1.04421	HILIC-POS
HMDB0001487	9.98_666.1316m/z	666.132	9.98418	NADH	C21H29N7O14P2	51.1	-0.641981	HILIC-POS
HMDB0011737	12.29_277.1023m/z	277.102	12.289	gamma-Glutamylglutamic acid	C10H16N2O7	51.1	-2.59643	HILIC-POS
HMDB0013141	1.37_151.0599m/z	151.06	1.36838	1-Methylhypoxanthine	C6H6N4O	51.1	-10.3131	HILIC-POS
HMDB0015705	2.90_393.2206m/z	393.221	2.90095	Ivacaftor	C24H28N2O3	51.1	8.5264	HILIC-POS
HMDB0029009	3.77_294.1434m/z	294.143	3.76823	Phenylalanyl-Gamma-glutamate	C14H19N3O4	51.1	-4.73453	HILIC-POS
HMDB0031670	8.15_159.0752m/z	159.075	8.15362	1-(Hydroxymethyl)-5,5-dimethyl-2,4-imidazolidinedione	C6H10N2O3	51.1	-7.66717	HILIC-POS
HMDB0032055	4.14_198.0865m/z	198.087	4.14437	N-Acetylhistidine	C8H11N3O3	51.1	-4.14788	HILIC-POS
HMDB0061477	0.75_838.5577m/z	838.558	0.750417	PE(DiMe(11,3)/MonoMe(11,5))	C46H80NO10P	51.1	-1.8157	HILIC-POS
21807	8.71_397.2537m/z	397.254	8.71242	His Ile Lys	C18H32N6O4	51.2	-5.2139	HILIC-POS
HMDB0000684	3.12_209.0909m/z	209.091	3.12477	L-Kynurenine	C10H12N2O3	51.2	-5.75882	HILIC-POS
HMDB0001182	2.20_153.0397m/z	153.04	2.20317	6,8-Dihydroxypurine	C5H4N4O2	51.2	-6.91178	HILIC-POS
HMDB0006831	7.55_146.1171m/z	146.117	7.55167	3-Dehydroxycarnitine	C7H15NO2	51.2	-2.89071	HILIC-POS
HMDB0011668	8.24_342.1381m/z	342.138	8.24378	6-(alpha-D-Glucosaminyl)-1D-myo-inositol	C12H23NO10	51.2	-4.07978	HILIC-POS
HMDB0028910	1.69_245.1848m/z	245.185	1.68685	Isoleucyl-Isoleucine	C12H24N2O3	51.2	-4.85801	HILIC-POS
HMDB0029223	0.97_180.1008m/z	180.101	0.965733	alpha-Methylphenylalanine	C10H13NO2	51.2	-6.33563	HILIC-POS
HMDB0061705	9.78_144.0643m/z	144.064	9.78037	6-Oxopiperidine-2-carboxylic acid	C6H9NO3	51.2	-8.46611	HILIC-POS
16789	11.96_276.1543m/z	276.154	11.9567	Val Gly Thr	C11H21N3O5	51.3	-4.03712	HILIC-POS
HMDB0000045	9.69_348.0703m/z	348.07	9.69103	Adenosine monophosphate	C10H14N5O7P	51.3	-0.27383	HILIC-POS
HMDB0000828	10.41_177.0493m/z	177.049	10.413	Ureidosuccinic acid	C5H8N2O5	51.3	-7.55549	HILIC-POS
HMDB0038458	11.46_499.1144m/z	499.114	11.4641	N,N'-Bis(gamma-glutamyl)cystine	C16H26N4O10S2	51.3	-3.8035	HILIC-POS
HMDB0000802	2.00_164.0555m/z	164.056	1.99617	Pterin	C6H5N5O	51.4	-6.98509	HILIC-POS
85175	1.19_372.3096m/z	372.31	1.18772	(Â±)-Myristoylcarnitine	C21H41NO4	51.5	-3.34026	HILIC-POS
HMDB0000050	1.83_268.1041m/z	268.104	1.82735	Adenosine	C10H13N5O4	51.5	0.447878	HILIC-POS
HMDB0010386	1.26_520.3376m/z	520.338	1.26188	LysoPC(18:2(9Z,12Z))	C26H50NO7P	51.5	-4.26353	HILIC-POS
HMDB0037845	6.81_344.1321m/z	344.132	6.81305	N-(1-Deoxy-1-fructosyl)tyrosine	C15H21NO8	51.5	-5.47054	HILIC-POS
96354	8.37_344.0936m/z	344.094	8.36528	1-Anilino-9,10-dioxo-2-anthroic acid	C21H13NO4	51.6	5.54296	HILIC-POS
HMDB0000489	10.33_336.1395m/z	336.139	10.3318	Aspartylglycosamine	C12H21N3O8	51.6	-1.91524	HILIC-POS
HMDB0000719	8.41_120.0642m/z	120.064	8.41362	L-Homoserine	C4H9NO3	51.6	-10.8115	HILIC-POS
HMDB0006029	5.72_189.0859m/z	189.086	5.71678	N-Acetylglutamine	C7H12N2O4	51.6	-5.77556	HILIC-POS
85176	3.72_218.1385m/z	218.138	3.7234	(Â±)-Propionylcarnitine	C10H19NO4	51.7	-1.02932	HILIC-POS
HMDB0000033	9.37_227.1132m/z	227.113	9.37288	Carnosine	C9H14N4O3	51.7	-3.16066	HILIC-POS
HMDB0000656	13.03_427.0942m/z	427.094	13.0278	Cysteineglutathione disulfide	C13H22N4O8S2	51.7	-2.31437	HILIC-POS
HMDB0008854	0.78_634.4506m/z	634.451	0.782083	PE(14:1(9Z)/14:0)	C33H64NO8P	51.7	10.0251	HILIC-POS
HMDB0013112	11.06_608.0886m/z	608.089	11.0618	UDP-N-acetyl-D-mannosamine	C17H27N3O17P2	51.7	-0.357496	HILIC-POS
HMDB0034879	12.56_309.1647m/z	309.165	12.563	1-[(5-Amino-5-carboxypentyl)amino]-1-deoxyfructose	C12H24N2O7	51.7	-2.88466	HILIC-POS
20525	8.85_377.2016m/z	377.202	8.84642	Glu Thr Lys	C15H28N4O7	51.8	-3.8317	HILIC-POS
HMDB0000228	4.69_95.0482m/z	95.0482	4.69383	Phenol	C6H6O	51.8	-9.9759	HILIC-POS
HMDB0001218	4.69_147.0431m/z	147.043	4.69383	Coumarin	C9H6O2	51.8	-6.62832	HILIC-POS
3453	10.03_325.0448m/z	325.045	10.0287	Uridine monophosphate (UMP)	C9H13N2O9P	51.9	5.04748	HILIC-POS
HMDB0002005	7.42_166.0521m/z	166.052	7.417	Methionine sulfoxide	C5H11NO3S	51.9	-7.0354	HILIC-POS
HMDB0002334	0.73_167.0330m/z	167.033	0.734917	Benzoquinoneacetic acid	C8H6O4	51.9	-5.23621	HILIC-POS
HMDB0008156	6.28_830.5615m/z	830.561	6.28407	PC(18:2(9Z,12Z)/22:6(4Z,7Z,10Z,13Z,16Z,19Z))	C48H80NO8P	51.9	-9.58938	HILIC-POS
HMDB0013311	8.27_145.0484m/z	145.048	8.27445	trans-2-Hexenedioic acid	C6H8O4	51.9	-7.61055	HILIC-POS
HMDB0028906	8.56_261.1430m/z	261.143	8.56177	Isoleucyl-Glutamate	C11H20N2O5	51.9	-5.82832	HILIC-POS
HMDB0000262	1.31_127.0490m/z	127.049	1.30705	Thymine	C5H6N2O2	52	-9.87493	HILIC-POS
HMDB0001564	11.23_447.0661m/z	447.066	11.2276	CDP-Ethanolamine	C11H20N4O11P2	52	-3.43912	HILIC-POS
HMDB0014539	3.61_261.1798m/z	261.18	3.60575	Carisoprodol	C12H24N2O4	52	-4.12356	HILIC-POS
HMDB0094708	1.15_195.1216m/z	195.122	1.15355	Tetraethylene glycol	C8H18O5	52	-5.73238	HILIC-POS
17779	4.77_401.2858m/z	401.286	4.76983	Leu Leu Arg	C18H36N6O4	52.1	-3.28415	HILIC-POS
HMDB0000696	3.81_150.0576m/z	150.058	3.81323	L-Methionine	C5H11NO2S	52.1	-5.05521	HILIC-POS
HMDB0029444	3.35_130.0850m/z	130.085	3.35142	2-Pyrrolidineacetic acid	C6H11NO2	52.1	-9.91056	HILIC-POS
HMDB0034666	1.34_134.0589m/z	134.059	1.33738	(Â±)-2-Hydroxy-2-phenylacetonitrile	C8H7NO	52.1	-8.71076	HILIC-POS
22403	10.35_376.1925m/z	376.192	10.3478	Arg Ser Asn	C13H25N7O6	52.2	-3.869	HILIC-POS
85173	1.54_288.2158m/z	288.216	1.54087	(Â±)-Octanoylcarnitine	C15H29NO4	52.2	-4.08838	HILIC-POS
HMDB0029060	10.49_249.1069m/z	249.107	10.4886	Threoninyl-Glutamate	C9H16N2O6	52.2	-5.00129	HILIC-POS
HMDB0029132	10.83_246.1809m/z	246.181	10.83	Valyl-Lysine	C11H23N3O3	52.2	-1.28552	HILIC-POS
HMDB0034438	0.81_287.0902m/z	287.09	0.81375	(R)-Pabulenol	C16H14O5	52.2	-4.11156	HILIC-POS
20914	0.94_388.2525m/z	388.253	0.936567	Lys Leu Gln	C17H33N5O5	52.3	-7.48663	HILIC-POS
HMDB0000472	3.75_221.0915m/z	221.091	3.75357	5-Hydroxy-L-tryptophan	C11H12N2O3	52.3	-2.66027	HILIC-POS
HMDB0034240	1.54_105.0686m/z	105.069	1.54087	Styrene	C8H8	52.3	-11.9242	HILIC-POS
HMDB0141768	4.68_165.0542m/z	165.054	4.67833	3-(4-hydroxyphenyl)oxirane-2-carbaldehyde	C9H8O3	52.3	-2.3805	HILIC-POS
16989	3.09_318.2010m/z	318.201	3.09393	Val Ser Ile	C14H27N3O5	52.4	-4.40217	HILIC-POS
163367	9.34_529.3800m/z	529.38	9.34138	Ile Leu Arg Lys	C24H48N8O5	52.4	-3.9062	HILIC-POS
HMDB0000099	11.29_223.0746m/z	223.075	11.2903	L-Cystathionine	C7H14N2O4S	52.4	-0.580566	HILIC-POS
HMDB0012289	9.27_172.0593m/z	172.059	9.26688	Tetrahydrodipicolinate	C7H9NO4	52.4	-6.69304	HILIC-POS
HMDB0001276	10.92_188.1747m/z	188.175	10.9201	N1-Acetylspermidine	C9H21N3O	52.5	-5.63115	HILIC-POS
HMDB0001413	11.11_489.1140m/z	489.114	11.1056	Citicoline	C14H26N4O11P2	52.5	-1.2893	HILIC-POS
HMDB0003764	10.23_219.0966m/z	219.097	10.234	Glutamylalanine	C8H14N2O5	52.5	-4.2184	HILIC-POS
HMDB0037841	6.28_312.1097m/z	312.11	6.28407	N-(1-Deoxy-1-fructosyl)methionine	C11H21NO7S	52.5	-4.64552	HILIC-POS
16592	12.09_390.1968m/z	390.197	12.0895	Glu Asn Lys	C15H27N5O7	52.6	-3.83837	HILIC-POS
HMDB0000159	2.96_166.0860m/z	166.086	2.96045	L-Phenylalanine	C9H11NO2	52.6	-1.30335	HILIC-POS
HMDB0004207	8.56_276.1538m/z	276.154	8.56177	Glutamyllysine	C11H21N3O5	52.6	-5.98534	HILIC-POS
HMDB0015078	7.32_212.1020m/z	212.102	7.31702	Zalcitabine	C9H13N3O3	52.6	-4.58841	HILIC-POS
HMDB0028900	3.26_203.1379m/z	203.138	3.26227	Isoleucyl-Alanine	C9H18N2O3	52.6	-5.68925	HILIC-POS
HMDB0112462	9.39_838.5596m/z	838.56	9.38905	PS(18:3(6Z,9Z,12Z)/22:2(13Z,16Z))	C46H80NO10P	52.6	0.448356	HILIC-POS
64926	0.75_338.3404m/z	338.34	0.750417	13Z-Docosenamide	C22H43NO	52.7	-3.83813	HILIC-POS
HMDB0000279	11.43_277.1387m/z	277.139	11.4313	Saccharopine	C11H20N2O6	52.7	-2.67558	HILIC-POS
HMDB0000630	2.20_112.0494m/z	112.049	2.20317	Cytosine	C4H5N3O	52.7	-10.4837	HILIC-POS
HMDB0000786	5.58_153.0395m/z	153.039	5.58045	Oxypurinol	C5H4N4O2	52.7	-8.11952	HILIC-POS
HMDB0000965	6.13_110.0263m/z	110.026	6.12808	Hypotaurine	C2H7NO2S	52.7	-6.51053	HILIC-POS
HMDB0003423	7.48_147.0764m/z	147.076	7.4775	D-Glutamine	C5H10N2O3	52.7	-0.403601	HILIC-POS
HMDB0006695	1.32_229.1172m/z	229.117	1.32205	Prolylhydroxyproline	C10H16N2O4	52.7	-4.56716	HILIC-POS
HMDB0060680	4.05_152.0691m/z	152.069	4.04688	2-Amino-3-methylbenzoate	C8H9NO2	52.7	-9.67079	HILIC-POS
HMDB0061694	2.12_524.2963m/z	524.296	2.12383	1-Oleoylglycerophosphoserine	C24H46NO9P	52.7	-3.85281	HILIC-POS
HMDB0000230	9.78_310.1138m/z	310.114	9.78037	N-Acetylneuraminic acid	C11H19NO9	52.8	1.61682	HILIC-POS
HMDB0000912	9.95_384.1147m/z	384.115	9.95368	Succinyladenosine	C14H17N5O8	52.8	-0.876503	HILIC-POS
HMDB0000095	11.51_324.0585m/z	324.058	11.5083	Cytidine monophosphate	C9H14N3O8P	52.9	-2.03913	HILIC-POS
HMDB0002007	1.19_357.2773m/z	357.277	1.18772	Tetracosahexaenoic acid	C24H36O2	52.9	-4.15348	HILIC-POS
HMDB0006722	0.75_401.3403m/z	401.34	0.750417	25-Hydroxytachysterol3	C27H44O2	52.9	-2.87933	HILIC-POS
HMDB0012285	15.14_274.9727m/z	274.973	15.1394	Ribose-1-arsenate	C5H11AsO8	52.9	-5.5658	HILIC-POS
HMDB0035178	1.34_170.0806m/z	170.081	1.33738	6-Acetyl-2,3-dihydro-2-(hydroxymethyl)-4(1H)-pyridinone	C8H11NO3	52.9	-3.5017	HILIC-POS
HMDB0037840	5.50_294.1535m/z	294.154	5.49528	N-(1-Deoxy-1-fructosyl)leucine	C12H23NO7	52.9	-4.07486	HILIC-POS
HMDB0059659	6.23_132.0649m/z	132.065	6.23258	Trans-3-hydroxy-L-proline	C5H9NO3	52.9	-4.5948	HILIC-POS
HMDB0000229	11.29_335.0624m/z	335.062	11.2903	Nicotinamide ribotide	C11H15N2O8P	53	-4.54787	HILIC-POS
HMDB0001431	4.03_169.0960m/z	169.096	4.03022	Pyridoxamine	C8H12N2O2	53	-6.95821	HILIC-POS
HMDB0011488	1.32_502.2909m/z	502.291	1.32205	LysoPE(0:0/20:4(8Z,11Z,14Z,17Z))	C25H44NO7P	53	-3.83441	HILIC-POS
HMDB0013642	3.53_240.1080m/z	240.108	3.53075	1-hydroxy-2-Oxopropyl tetrahydropterin	C9H13N5O3	53	-4.75982	HILIC-POS
HMDB0029033	9.61_262.1502m/z	262.15	9.6142	Serylarginine	C9H19N5O4	53	-2.81972	HILIC-POS
HMDB0029397	9.25_225.0860m/z	225.086	9.25088	L-Nicotianine	C10H12N2O4	53	-4.27459	HILIC-POS
HMDB0030353	6.35_156.1008m/z	156.101	6.35173	Arecoline	C8H13NO2	53	-7.42053	HILIC-POS
HMDB0033453	3.47_148.0954m/z	148.095	3.47242	Fagomine	C6H13NO3	53	-9.45107	HILIC-POS
HMDB0039499	1.22_134.0797m/z	134.08	1.21722	1,4-Dideoxy-1,4-imino-D-ribitol	C5H11NO3	53	-10.9334	HILIC-POS
16487	2.67_392.2182m/z	392.218	2.6713	Ile Pro Tyr	C20H29N3O5	53.1	0.401237	HILIC-POS
HMDB0004181	2.14_125.0704m/z	125.07	2.13983	Methylimidazole acetaldehyde	C6H8N2O	53.1	-4.06922	HILIC-POS
HMDB0011172	8.58_247.1277m/z	247.128	8.57843	gamma-Glutamylvaline	C10H18N2O5	53.1	-4.58473	HILIC-POS
HMDB0028811	8.68_275.1340m/z	275.134	8.6791	Glutaminyl-Gamma-glutamate	C10H18N4O5	53.1	-3.48468	HILIC-POS
22055	9.15_403.2289m/z	403.229	9.14923	Asp Ile Arg	C16H30N6O6	53.2	-2.5447	HILIC-POS
HMDB0001041	9.65_852.1779m/z	852.178	9.64503	2-Methylbutyryl-CoA	C26H44N7O17P3S	53.2	-2.51145	HILIC-POS
HMDB0031654	7.17_104.0697m/z	104.07	7.16785	3-Aminobutanoic acid	C4H9NO2	53.2	-8.43015	HILIC-POS
HMDB0000904	8.15_176.1018m/z	176.102	8.15362	Citrulline	C6H13N3O3	53.3	-6.65192	HILIC-POS
HMDB0011174	3.47_229.1534m/z	229.153	3.47242	Isoleucylproline	C11H20N2O3	53.3	-5.7231	HILIC-POS
HMDB0028912	7.05_260.1965m/z	260.197	7.04953	Isoleucyl-Lysine	C12H25N3O3	53.3	-1.26601	HILIC-POS
HMDB0128223	7.60_467.1356m/z	467.136	7.59867	3,4,5-trihydroxy-2-[hydroxy(3,4,5-trihydroxyoxan-2-yl)methyl]-4-[3,4,5-trihydroxy-6-(hydroxymethyl)oxan-2-yl]cyclohexa-2,5-dien-1-one	C18H26O14	53.3	-8.47244	HILIC-POS
64742	1.15_243.0866m/z	243.087	1.15355	Lumichrome	C12H10N4O2	53.4	-4.53005	HILIC-POS
HMDB0006483	9.51_134.0439m/z	134.044	9.51053	D-Aspartic acid	C4H7NO4	53.4	-6.46326	HILIC-POS
HMDB0011503	1.37_454.2906m/z	454.291	1.36838	LysoPE(16:0/0:0)	C21H44NO7P	53.4	-4.86485	HILIC-POS
HMDB0028813	8.09_304.1604m/z	304.16	8.0918	Glutamylarginine	C11H21N5O5	53.4	-3.66609	HILIC-POS
HMDB0060643	2.62_442.0587m/z	442.059	2.62347	Tizoxanide glucuronide	C16H15N3O10S	53.4	8.08373	HILIC-POS
16101	8.71_409.2063m/z	409.206	8.71242	Phe Asp Lys	C19H28N4O6	53.5	-4.44502	HILIC-POS
65341	6.71_359.1230m/z	359.123	6.71222	Ala-HoPhe-OH	C18H18N2O6	53.5	-2.09646	HILIC-POS
HMDB0000538	13.79_508.0024m/z	508.002	13.7906	Adenosine triphosphate	C10H16N5O13P3	53.5	-1.16617	HILIC-POS
HMDB0002031	8.17_147.0753m/z	147.075	8.16845	Ureidoisobutyric acid	C5H10N2O3	53.5	-7.5943	HILIC-POS
HMDB0011489	1.34_500.2752m/z	500.275	1.33738	LysoPE(0:0/20:5(5Z,8Z,11Z,14Z,17Z))	C25H42NO7P	53.5	-3.95493	HILIC-POS
HMDB0015212	11.15_130.0857m/z	130.086	11.1508	Vigabatrin	C6H11NO2	53.5	-3.91311	HILIC-POS
HMDB0033482	6.35_178.0850m/z	178.085	6.35173	Plantagonine	C10H11NO2	53.5	-6.97579	HILIC-POS
HMDB0039421	10.77_664.1163m/z	664.116	10.7711	Fenugreekine	C21H27N7O14P2	53.5	-0.136674	HILIC-POS
HMDB0059735	11.83_127.0377m/z	127.038	11.8257	5-Methylfuran-2-carboxylic acid	C6H6O3	53.5	-10.1548	HILIC-POS
HMDB0000101	1.56_252.1079m/z	252.108	1.55703	Deoxyadenosine	C10H13N5O3	53.7	-4.89062	HILIC-POS
HMDB0000121	10.62_442.1459m/z	442.146	10.6213	Folic acid	C19H19N7O6	53.7	-2.46164	HILIC-POS
HMDB0034355	8.27_127.0377m/z	127.038	8.27445	5-Hydroxymethyl-2-furancarboxaldehyde	C6H6O3	53.7	-10.0883	HILIC-POS
HMDB0037842	9.10_268.1020m/z	268.102	9.09823	N-(1-Deoxy-1-fructosyl)serine	C9H17NO8	53.7	-2.71796	HILIC-POS
HMDB0033303	1.10_205.0847m/z	205.085	1.10373	Anofinic acid	C12H12O3	53.8	-5.86478	HILIC-POS
HMDB0038871	8.27_667.2274m/z	667.227	8.27445	Sesamose	C24H42O21	53.8	-2.66433	HILIC-POS
HMDB0040141	3.29_125.0702m/z	125.07	3.2921	2-Methoxy-5-methylpyrazine	C6H8N2O	53.8	-6.02227	HILIC-POS
HMDB0062444	2.06_226.1173m/z	226.117	2.0595	alpha-[3-[(Hydroxymethyl)nitrosoamino]propyl]-3-pyridinemethanol	C10H15N3O3	53.8	-5.84872	HILIC-POS
HMDB0000089	2.90_244.0915m/z	244.091	2.90095	Cytidine	C9H13N3O5	53.9	-5.39198	HILIC-POS
HMDB0000126	7.20_173.0202m/z	173.02	7.20102	Glycerol 3-phosphate	C3H9O6P	53.9	-4.48762	HILIC-POS
HMDB0000158	4.68_182.0808m/z	182.081	4.67833	L-Tyrosine	C9H11NO3	53.9	-2.01154	HILIC-POS
HMDB0000167	6.59_120.0647m/z	120.065	6.5889	L-Threonine	C4H9NO3	53.9	-7.20922	HILIC-POS
HMDB0000807	11.75_186.9989m/z	186.999	11.7532	3-Phosphoglyceric acid	C3H7O7P	53.9	-6.86046	HILIC-POS
HMDB0037843	8.41_282.1180m/z	282.118	8.41362	N-(1-Deoxy-1-fructosyl)threonine	C10H19NO8	53.9	-1.11671	HILIC-POS
23685	12.55_249.0710m/z	249.071	12.5464	Asp Asp	C8H12N2O7	54	-3.04411	HILIC-POS
HMDB0001112	9.92_171.0040m/z	171.004	9.92185	D-Glyceraldehyde 3-phosphate	C3H7O6P	54	-7.44296	HILIC-POS
HMDB0001538	4.13_138.0543m/z	138.054	4.12822	3-Pyridylacetic acid	C7H7NO2	54	-4.79666	HILIC-POS
HMDB0029117	2.69_345.1427m/z	345.143	2.6873	Tyrosyl-Tyrosine	C18H20N2O5	54	-5.22593	HILIC-POS
HMDB0000308	1.19_375.2878m/z	375.288	1.18772	3b-Hydroxy-5-cholenoic acid	C24H38O3	54.1	-4.28319	HILIC-POS
HMDB0001341	10.77_428.0349m/z	428.035	10.7711	ADP	C10H15N5O10P2	54.1	-4.21636	HILIC-POS
HMDB0029066	9.42_248.1594m/z	248.159	9.42172	Threoninyl-Lysine	C10H21N3O4	54.1	-4.19206	HILIC-POS
HMDB0000585	14.09_487.2119m/z	487.212	14.0879	Glucosylgalactosyl hydroxylysine	C18H34N2O13	54.2	-3.08165	HILIC-POS
HMDB0029055	8.90_276.1658m/z	276.166	8.89608	Threoninyl-Arginine	C10H21N5O4	54.2	-3.16342	HILIC-POS
HMDB0000177	7.46_156.0764m/z	156.076	7.4625	L-Histidine	C6H9N3O2	54.3	-2.30408	HILIC-POS
HMDB0001163	12.73_606.0834m/z	606.083	12.7287	Guanosine diphosphate mannose	C16H25N5O16P2	54.3	-1.62275	HILIC-POS
HMDB0002189	10.38_188.1745m/z	188.175	10.3808	N8-Acetylspermidine	C9H21N3O	54.3	-6.41488	HILIC-POS
HMDB0033529	11.15_84.0804m/z	84.0804	11.1508	(+)-2,3-Dihydro-3-methyl-1H-pyrrole	C5H9N	54.3	-4.03328	HILIC-POS
HMDB0034267	8.11_156.0759m/z	156.076	8.10763	L-2-Amino-3-(1-pyrazolyl)propanoic acid	C6H9N3O2	54.3	-5.54841	HILIC-POS
HMDB0039127	3.55_262.0899m/z	262.09	3.54608	Pisatoside	C10H15NO7	54.3	-8.43671	HILIC-POS
3318	11.57_184.0732m/z	184.073	11.5661	Phosphocholine	C5H14NO4P	54.4	-0.815472	HILIC-POS
HMDB0011749	6.20_100.0746m/z	100.075	6.19775	2-Piperidinone	C5H9NO	54.4	-11.2262	HILIC-POS
HMDB0034171	3.00_118.0638m/z	118.064	3.00445	Benzeneacetonitrile	C8H7N	54.4	-11.0215	HILIC-POS
HMDB0038662	8.88_252.1068m/z	252.107	8.87958	N-(1-Deoxy-1-fructosyl)alanine	C9H17NO7	54.4	-3.79319	HILIC-POS
3452	10.92_324.0581m/z	324.058	10.9201	5'-CMP	C9H14N3O8P	54.5	-3.16048	HILIC-POS
HMDB0028767	10.84_262.1024m/z	262.102	10.8448	Aspartyl-Gamma-glutamate	C9H15N3O6	54.5	-3.50164	HILIC-POS
17467	2.12_342.2372m/z	342.237	2.12383	Ile Pro Ile	C17H31N3O4	54.6	-4.53513	HILIC-POS
HMDB0002234	13.88_130.0486m/z	130.049	13.8799	1-Pyrroline-4-hydroxy-2-carboxylate	C5H7NO3	54.6	-9.456	HILIC-POS
HMDB0030419	9.65_263.0867m/z	263.087	9.64503	gamma-Glutamylaspartic acid	C9H14N2O7	54.6	-2.44133	HILIC-POS
HMDB0000148	12.29_148.0593m/z	148.059	12.289	L-Glutamic acid	C5H9NO4	54.7	-7.73676	HILIC-POS
HMDB0003540	10.79_348.0689m/z	348.069	10.7858	3'-AMP	C10H14N5O7P	54.7	-4.15433	HILIC-POS
HMDB0000133	3.38_284.0981m/z	284.098	3.38142	Guanosine	C10H13N5O5	54.8	-2.93966	HILIC-POS
HMDB0000168	7.70_133.0597m/z	133.06	7.69515	L-Asparagine	C4H8N2O3	54.8	-8.17666	HILIC-POS
HMDB0002273	9.60_164.0541m/z	164.054	9.59887	4-Hydroxy-L-glutamic acid	C5H9NO5	54.8	-7.59644	HILIC-POS
HMDB0015090	1.15_476.3044m/z	476.304	1.15355	Netilmicin	C21H41N5O7	54.8	-7.25458	HILIC-POS
HMDB0029022	10.84_244.1642m/z	244.164	10.8448	Prolyl-Lysine	C11H21N3O3	54.8	-5.51842	HILIC-POS
HMDB0035514	3.11_192.0644m/z	192.064	3.10943	xi-2,3-Dihydro-2-oxo-1H-indole-3-acetic acid	C10H9NO3	54.8	-6.02604	HILIC-POS
HMDB0061679	3.84_184.0957m/z	184.096	3.84422	3,4,5,6-Tetrahydrohippuric acid	C9H13NO3	54.8	-5.96981	HILIC-POS
23514	8.46_388.2526m/z	388.253	8.46277	Gln Leu Lys	C17H33N5O5	54.9	-7.39233	HILIC-POS
HMDB0000078	9.47_179.0476m/z	179.048	9.46705	Cysteinylglycine	C5H10N2O3S	54.9	-4.9084	HILIC-POS
HMDB0000214	11.18_133.0958m/z	133.096	11.1814	Ornithine	C5H12N2O2	54.9	-9.88756	HILIC-POS
HMDB0002815	2.77_522.3530m/z	522.353	2.76747	LysoPC(18:1(9Z))	C26H52NO7P	54.9	-4.6019	HILIC-POS
HMDB0028796	10.98_276.1182m/z	276.118	10.9841	Glutaminylglutamic acid	C10H17N3O6	54.9	-3.12267	HILIC-POS
HMDB0028828	10.97_235.0914m/z	235.091	10.968	Glutamylserine	C8H14N2O6	54.9	-4.68107	HILIC-POS
HMDB0029873	7.99_168.0754m/z	168.075	7.99397	(S)-Spinacine	C7H9N3O2	55.1	-7.9685	HILIC-POS
HMDB0032985	4.65_144.0471m/z	144.047	4.64752	5-(2-Hydroxyethyl)-4-methylthiazole	C6H9NOS	55.1	-4.74148	HILIC-POS
HMDB0000210	3.49_220.1182m/z	220.118	3.48725	Pantothenic acid	C9H17NO5	55.2	1.15671	HILIC-POS
HMDB0001257	0.68_146.1639m/z	146.164	0.68255	Spermidine	C7H19N3	55.2	-8.48792	HILIC-POS
HMDB0011170	7.60_261.1436m/z	261.144	7.59867	gamma-Glutamylisoleucine	C11H20N2O5	55.2	-3.46499	HILIC-POS
HMDB0012151	3.32_146.0795m/z	146.079	3.32175	2-Keto-6-aminocaproate	C6H11NO3	55.2	-11.7441	HILIC-POS
HMDB0029121	7.38_274.1870m/z	274.187	7.38367	Valyl-Arginine	C11H23N5O3	55.2	-1.25429	HILIC-POS
HMDB0126666	2.59_497.0586m/z	497.059	2.59197	6-({1-carboxy-3,4,9,10-tetrahydroxy-6-oxo-6H-benzo[c]chromen-8-yl}oxy)-3,4,5-trihydroxyoxane-2-carboxylic acid	C20H16O15	55.2	4.80788	HILIC-POS
HMDB0000125	10.97_308.0900m/z	308.09	10.968	Glutathione	C10H17N3O6S	55.4	-3.50849	HILIC-POS
HMDB0000162	11.17_116.0693m/z	116.069	11.1661	L-Proline	C5H9NO2	55.4	-11.001	HILIC-POS
HMDB0003609	9.51_88.0384m/z	88.0384	9.51053	2-Aminoacrylic acid	C3H5NO2	55.4	-10.3922	HILIC-POS
HMDB0006009	10.65_161.1273m/z	161.127	10.6538	Isoputreanine	C7H16N2O2	55.4	-7.12712	HILIC-POS
HMDB0028921	4.88_260.1594m/z	260.159	4.87783	Isoleucyl-Gamma-glutamate	C11H21N3O4	55.4	-4.10635	HILIC-POS
HMDB0032231	2.64_90.0906m/z	90.0906	2.63947	Dimethylethanolamine	C4H11NO	55.5	-8.73847	HILIC-POS
HMDB0062735	5.41_248.1484m/z	248.148	5.4143	(R)-3-hydroxybutyrylcarnitine	C11H21NO5	55.5	-3.54093	HILIC-POS
HMDB0094713	6.13_203.1383m/z	203.138	6.12808	N-Acetylisoputreanine	C9H18N2O3	55.5	-3.54285	HILIC-POS
44314	13.70_424.1015m/z	424.101	13.6978	S-(1,2-DICARBOXYETHYL)GLUTATHIONE	C14H21N3O10S	55.6	-1.35481	HILIC-POS
HMDB0000001	6.92_170.0914m/z	170.091	6.91553	1-Methylhistidine	C7H11N3O2	55.6	-5.6397	HILIC-POS
HMDB0001265	9.17_245.0409m/z	245.041	9.16607	Fucose 1-phosphate	C6H13O8P	55.6	-4.87384	HILIC-POS
HMDB0011129	1.38_482.3248m/z	482.325	1.38338	LysoPE(0:0/18:0)	C23H48NO7P	55.6	1.48855	HILIC-POS
HMDB0029615	3.83_102.0539m/z	102.054	3.8279	(S)-2-Azetidinecarboxylic acid	C4H7NO2	55.6	-10.6674	HILIC-POS
HMDB0036458	7.49_102.0540m/z	102.054	7.49233	1-Aminocyclopropanecarboxylic acid	C4H7NO2	55.6	-9.62462	HILIC-POS
229	4.65_265.1118m/z	265.112	4.64752	Thiamine	C12H16N4OS	55.7	0.339035	HILIC-POS
HMDB0001129	3.41_222.0961m/z	222.096	3.41225	N-Acetylmannosamine	C8H15NO6	55.7	-5.0651	HILIC-POS
HMDB0028901	7.02_288.2017m/z	288.202	7.01587	Isoleucyl-Arginine	C12H25N5O3	55.7	-4.47609	HILIC-POS
HMDB0134728	0.73_261.1477m/z	261.148	0.734917	5-methyl-5-(4-methylpent-3-en-1-yl)-3,6-dioxatricyclo[5.4.0.0Â²,â´]undeca-1(7),8,10-trien-8-ol	C16H20O3	55.7	-3.02307	HILIC-POS
HMDB0000251	7.71_126.0209m/z	126.021	7.71082	Taurine	C2H7NO3S	55.8	-8.15206	HILIC-POS
HMDB0029898	8.27_343.1237m/z	343.124	8.27445	Inulobiose	C12H22O11	55.8	0.524437	HILIC-POS
HMDB0002064	4.16_131.1167m/z	131.117	4.16087	N-Acetylputrescine	C6H14N2O	55.9	-8.85207	HILIC-POS
HMDB0003406	7.55_106.0491m/z	106.049	7.55167	D-Serine	C3H7NO3	55.9	-7.3083	HILIC-POS
HMDB0029057	10.83_235.0911m/z	235.091	10.83	Threoninyl-Aspartate	C8H14N2O6	55.9	-6.02484	HILIC-POS
HMDB0000267	4.13_130.0487m/z	130.049	4.12822	Pyroglutamic acid	C5H7NO3	56	-8.88528	HILIC-POS
HMDB0000285	14.17_484.9758m/z	484.976	14.1724	Uridine triphosphate	C9H15N2O15P3	56	-0.0563752	HILIC-POS
HMDB0001532	13.40_492.0060m/z	492.006	13.4001	Deoxyadenosine triphosphate	C10H16N5O12P3	56	-4.20852	HILIC-POS
HMDB0014634	1.53_208.1172m/z	208.117	1.52503	Miglitol	C8H17NO5	56	-3.79349	HILIC-POS
HMDB0028956	11.03_275.2066m/z	275.207	11.0325	Lysyl-Lysine	C12H26N4O3	56	-4.25209	HILIC-POS
HMDB0029123	9.66_233.1118m/z	233.112	9.66087	Valyl-Aspartate	C9H16N2O5	56	-5.88736	HILIC-POS
HMDB0061890	10.44_187.0701m/z	187.07	10.4427	Pyroglutamylglycine	C7H10N2O4	56	-6.79635	HILIC-POS
HMDB0029041	8.91_243.1077m/z	243.108	8.91292	Serylhistidine	C9H14N4O4	56.1	-4.4982	HILIC-POS
96392	3.02_146.0591m/z	146.059	3.01912	4-formyl Indole	C9H7NO	56.2	-6.71235	HILIC-POS
HMDB0004195	9.17_255.0637m/z	255.064	9.16607	5-L-Glutamyl-taurine	C7H14N2O6S	56.2	-3.38461	HILIC-POS
HMDB0000935	13.26_581.0410m/z	581.041	13.2618	Uridine diphosphate glucuronic acid	C15H22N2O18P2	56.3	-1.0025	HILIC-POS
HMDB0029005	2.75_267.1331m/z	267.133	2.75163	Phenylalanyl-Threonine	C13H18N2O4	56.3	-3.30057	HILIC-POS
HMDB0000403	2.56_152.0556m/z	152.056	2.5623	2-Hydroxyadenine	C5H5N5O	56.4	-7.03749	HILIC-POS
HMDB0029010	6.92_187.1066m/z	187.107	6.91553	Prolyl-Alanine	C8H14N2O3	56.7	-6.21367	HILIC-POS
HMDB0038594	6.65_176.0906m/z	176.091	6.64738	Calystegine B2	C7H13NO4	56.7	-6.6303	HILIC-POS
19666	6.81_346.1961m/z	346.196	6.81305	Asp Val Leu	C15H27N3O6	56.9	-3.43353	HILIC-POS
HMDB0000086	12.99_258.1094m/z	258.109	12.9942	Glycerophosphocholine	C8H20NO6P	56.9	-2.54431	HILIC-POS
3271	9.78_162.0751m/z	162.075	9.78037	L-2-Aminoadipic acid	C6H11NO4	57.2	-6.39351	HILIC-POS
HMDB0000132	11.00_152.0556m/z	152.056	11.0003	Guanine	C5H5N5O	57.4	-6.87516	HILIC-POS
102	13.54_744.0816m/z	744.082	13.5388	Nicotinamide Adenine Dinucleotide Phosphate (NADP+)	C21H28N7O17P3	57.7	-1.4681	HILIC-POS
65534	3.02_205.0965m/z	205.096	3.01912	DL-Tryptophan	C11H12N2O2	58.3	-3.32877	HILIC-POS
66352	4.71_123.0436m/z	123.044	4.70917	Salicylaldehyde	C7H6O2	58.4	-3.5849	HILIC-POS
3289	11.21_399.1443m/z	399.144	11.2128	S-Adenosylmethionine	C15H22N6O5S	58.9	-0.541992	HILIC-POS
63632	9.28_130.0496m/z	130.05	9.28172	(R)-(+)-2-Pyrrolidone-5-carboxylic acid	C5H7NO3	58.9	-2.36126	HILIC-POS

## Sheet: HILIC_NEG
Table S2. Identified 840 metabolites from all samples by HILIC-NEG analysis mode
Metabolite ID	Metabolic feature	m/z	Retention time (min)	Metabolite name	Formula	Score	Mass Error (ppm)	Mode
160473	9.11_514.2981m/z	514.298	9.11365	Ile Asp Leu Arg	C22H41N7O7	39.5	-2.74538	HILIC-NEG
2528	2.22_255.0446m/z	255.045	2.22225	N1,N4-Diacetylsulfanilamide	C10H12N2O4S	39.6	0.307897	HILIC-NEG
HMDB0000806	0.84_227.2016m/z	227.202	0.839167	Myristic acid	C14H28O2	39.9	-0.390452	HILIC-NEG
HMDB0116632	0.75_819.5184m/z	819.518	0.746667	PG(22:6(4Z,7Z,10Z,13Z,16Z,19Z)/18:1(11Z))	C46H77O10P	39.9	0.245803	HILIC-NEG
HMDB0000207	0.81_281.2487m/z	281.249	0.808667	Oleic acid	C18H34O2	40	0.192561	HILIC-NEG
63157	7.79_243.0291m/z	243.029	7.78607	Î²-L-Fucose 1-phosphate	C6H13O8P	40.1	6.56202	HILIC-NEG
65012	0.70_433.1399m/z	433.14	0.699017	HoPhe-Phe-OH	C24H22N2O6	40.1	-1.47934	HILIC-NEG
HMDB0009001	0.92_768.5500m/z	768.55	0.9185	PE(18:0/20:3(5Z,8Z,11Z))	C43H80NO8P	40.1	-6.28985	HILIC-NEG
HMDB0010733	0.87_269.2113m/z	269.211	0.869667	3-Oxohexadecanoic acid	C16H30O3	40.1	-3.39279	HILIC-NEG
HMDB0060943	8.58_387.1132m/z	387.113	8.58202	Sulfinpyrazone sulfide	C23H20N2O2S	40.1	-10.4319	HILIC-NEG
3303	6.34_173.0927m/z	173.093	6.33815	N2-Acetyl-L-ornithine	C7H14N2O3	40.2	-2.85543	HILIC-NEG
4237	2.88_192.0657m/z	192.066	2.8757	Phenylacetylglycine	C10H11NO3	40.3	-4.94821	HILIC-NEG
45164	8.93_183.0406m/z	183.041	8.92617	Trimidox	C7H8N2O4	40.3	-3.055	HILIC-NEG
HMDB0001328	11.35_563.0678m/z	563.068	11.3463	dTDP-D-glucose	C16H26N2O16P2	40.3	-1.13705	HILIC-NEG
HMDB0041136	11.84_365.1192m/z	365.119	11.8361	3''-Chloro-3''-deoxytriphasiol	C19H23ClO5	40.4	8.37495	HILIC-NEG
HMDB0130253	11.76_465.1077m/z	465.108	11.7598	3,4,5-trihydroxy-6-{4-[3-oxo-3-(2,3,4,6-tetrahydroxyphenyl)propyl]phenoxy}oxane-2-carboxylic acid	C21H22O12	40.4	8.35201	HILIC-NEG
HMDB0000182	11.49_145.0983m/z	145.098	11.4902	L-Lysine	C6H14N2O2	40.5	0.509415	HILIC-NEG
HMDB0001369	5.67_128.0352m/z	128.035	5.67137	Pyrroline hydroxycarboxylic acid	C5H7NO3	40.5	-1.10315	HILIC-NEG
HMDB0037741	9.55_723.4150m/z	723.415	9.54697	Bismurrayafoline E	C48H56N2O4	40.5	-2.34154	HILIC-NEG
HMDB0000425	9.31_267.0718m/z	267.072	9.31348	3-Deoxy-D-glycero-D-galacto-2-nonulosonic acid	C9H16O9	40.6	-1.22815	HILIC-NEG
HMDB0031552	4.47_369.1318m/z	369.132	4.4691	Dihydrocurcumin	C21H22O6	40.6	-6.82077	HILIC-NEG
HMDB0040310	3.52_345.1332m/z	345.133	3.52483	5'-Hydroxy-3',4',7,8-tetramethoxyflavan	C19H22O6	40.7	-3.45194	HILIC-NEG
HMDB0001385	7.64_177.0400m/z	177.04	7.63558	3-Keto-b-D-galactose	C6H10O6	40.8	-2.72791	HILIC-NEG
HMDB0011493	1.35_528.3078m/z	528.308	1.3508	LysoPE(0:0/22:4(7Z,10Z,13Z,16Z))	C27H48NO7P	40.8	-3.27989	HILIC-NEG
HMDB0015286	7.02_388.1443m/z	388.144	7.01895	Gemifloxacin	C18H20FN5O4	40.8	4.27909	HILIC-NEG
HMDB0036783	3.41_537.2014m/z	537.201	3.40783	Diosbulbinoside F	C26H34O12	40.8	6.82507	HILIC-NEG
HMDB0029902	9.10_535.1519m/z	535.152	9.09815	Galabiose	C18H32O18	40.9	0.528453	HILIC-NEG
HMDB0030842	2.30_311.0939m/z	311.094	2.29892	4',5,7-Trimethoxyflavone	C18H16O5	40.9	4.65212	HILIC-NEG
HMDB0041323	6.84_451.1813m/z	451.181	6.84163	Heteroartonin A	C26H28O7	40.9	11.178	HILIC-NEG
HMDB0132694	14.14_566.1823m/z	566.182	14.1405	2-amino-4-({1-[(carboxymethyl)-C-hydroxycarbonimidoyl]-2-{[3-hydroxy-4-(7-methoxy-2-oxo-2H-chromen-8-yl)-2-methylbutan-2-yl]sulfanyl}ethyl}-C-hydroxycarbonimidoyl)butanoic acid	C25H33N3O10S	40.9	1.64635	HILIC-NEG
HMDB0000687	3.78_130.0874m/z	130.087	3.77698	L-Leucine	C6H13NO2	41	0.192039	HILIC-NEG
HMDB0028848	4.52_221.0925m/z	221.092	4.5151	Glycyl-Phenylalanine	C11H14N2O3	41	-3.06788	HILIC-NEG
HMDB0036122	7.38_457.2397m/z	457.24	7.37543	[6]-Gingerdiol 4'-O-beta-D-glucopyranoside	C23H38O9	41	-10.0027	HILIC-NEG
HMDB0001311	3.31_89.0247m/z	89.0247	3.30568	D-Lactic acid	C3H6O3	41.1	3.41225	HILIC-NEG
HMDB0014607	0.75_293.1780m/z	293.178	0.746667	Sodium Tetradecyl Sulfate	C14H30O4S	41.1	-3.9707	HILIC-NEG
HMDB0034682	11.02_649.1963m/z	649.196	11.0155	cis-Ferulic acid [arabinosyl-(1->3)-[glucosyl-(1->6)]-glucosyl] ester	C27H38O18	41.1	-3.38994	HILIC-NEG
8	6.84_112.0511m/z	112.051	6.84163	Creatinine	C4H7N3O	41.2	-5.02502	HILIC-NEG
HMDB0000300	1.38_111.0199m/z	111.02	1.3813	Uracil	C4H4N2O2	41.2	-1.1665	HILIC-NEG
HMDB0000902	13.59_663.1081m/z	663.108	13.5907	NAD	C21H28N7O14P2+	41.2	-2.38279	HILIC-NEG
HMDB0009051	0.92_726.5429m/z	726.543	0.9185	PE(18:1(11Z)/P-18:1(9Z))	C41H78NO7P	41.2	-1.98427	HILIC-NEG
HMDB0013941	5.32_251.1016m/z	251.102	5.32188	Epoxy-hexobarbital	C12H16N2O4	41.2	-8.33022	HILIC-NEG
HMDB0133696	9.68_482.1605m/z	482.161	9.68012	2-amino-4-({1-[(carboxymethyl)-C-hydroxycarbonimidoyl]-2-[(2-hydroxy-2-methyl-3-oxo-1-phenylbutyl)sulfanyl]ethyl}-C-hydroxycarbonimidoyl)butanoic acid	C21H29N3O8S	41.2	0.501891	HILIC-NEG
HMDB0135084	13.90_643.1159m/z	643.116	13.902	{5-[3-(2,4-dihydroxyphenyl)-3-[2-(3,4-dihydroxyphenyl)-3,5,7-trihydroxy-3,4-dihydro-2H-1-benzopyran-8-yl]-2-hydroxypropyl]-2-hydroxyphenyl}oxidanesulfonic acid	C30H28O14S	41.2	4.94465	HILIC-NEG
45007	0.79_309.2791m/z	309.279	0.792833	Oleic Acid ethyl ester	C20H38O2	41.3	-2.68913	HILIC-NEG
HMDB0009195	1.29_730.4507m/z	730.451	1.2888	PE(18:4(6Z,9Z,12Z,15Z)/18:4(6Z,9Z,12Z,15Z))	C41H66NO8P	41.3	7.33512	HILIC-NEG
HMDB0135638	7.26_431.1336m/z	431.134	7.26393	3,4,5-trihydroxy-6-{4-[3-(4-methoxyphenyl)-3-oxopropyl]phenoxy}oxane-2-carboxylic acid	C22H24O9	41.3	-2.7223	HILIC-NEG
HMDB0005776	6.92_499.2977m/z	499.298	6.91595	Kentsin	C21H40N8O6	41.4	-4.18306	HILIC-NEG
HMDB0009058	6.64_742.5383m/z	742.538	6.64448	PE(18:1(9Z)/18:1(11Z))	C41H78NO8P	41.4	-1.31399	HILIC-NEG
HMDB0033296	11.79_581.1794m/z	581.179	11.7905	Kuwanon Y	C34H30O9	41.4	-3.96926	HILIC-NEG
HMDB0038614	11.71_257.1137m/z	257.114	11.7142	gamma-L-Glutamyl-L-pipecolic acid	C11H18N2O5	41.4	-2.29289	HILIC-NEG
HMDB0040672	8.89_501.2299m/z	501.23	8.89467	3-Oxo-alpha-ionol 9-[apiosyl-(1->6)-glucoside]	C24H38O11	41.4	-8.45085	HILIC-NEG
HMDB0041638	11.73_481.1044m/z	481.104	11.7296	(-)-Epigallocatechin 3'-glucuronide	C21H22O13	41.4	11.6578	HILIC-NEG
HMDB0029117	2.96_343.1288m/z	343.129	2.9572	Tyrosyl-Tyrosine	C18H20N2O5	41.5	-3.40332	HILIC-NEG
211147	10.54_515.2818m/z	515.282	10.5376	Gln Leu Glu Lys	C22H40N6O8	41.6	-3.34128	HILIC-NEG
HMDB0006569	10.92_632.2039m/z	632.204	10.921	6'-Sialyllactose	C23H39NO19	41.6	-0.666845	HILIC-NEG
HMDB0010737	0.87_299.2579m/z	299.258	0.869667	(R)-3-Hydroxy-Octadecanoic acid	C18H36O3	41.6	-4.29661	HILIC-NEG
HMDB0039959	8.14_367.1039m/z	367.104	8.14072	3-O-Caffeoyl-1-O-methylquinic acid	C17H20O9	41.6	1.21773	HILIC-NEG
HMDB0128947	3.51_277.0728m/z	277.073	3.51033	8-(1,2-dihydroxypropan-2-yl)-9-hydroxy-2H,8H,9H-furo[2,3-h]chromen-2-one	C14H14O6	41.6	3.62115	HILIC-NEG
241241	3.02_506.2607m/z	506.261	3.02003	Val Phe Lys Asp	C24H37N5O7	41.7	-2.69355	HILIC-NEG
HMDB0061690	2.97_619.2883m/z	619.288	2.97303	1-Arachidonoylglycerophosphoinositol	C29H49O12P	41.7	-0.891472	HILIC-NEG
HMDB0001204	7.03_367.1157m/z	367.116	7.03362	trans-3-Hydroxycotinine glucuronide	C16H20N2O8	41.8	2.70507	HILIC-NEG
HMDB0005011	12.69_320.0551m/z	320.055	12.6898	Clopidogrel	C16H16ClNO2S	41.8	10.3792	HILIC-NEG
HMDB0029682	9.59_353.0269m/z	353.027	9.59312	Cyclovariegatin	C18H10O8	41.8	-9.66192	HILIC-NEG
HMDB0035345	9.36_829.4530m/z	829.453	9.36013	(3b,16a,20R)-3,16,20,22,25-Pentahydroxy-5-cucurbiten-11-one 3-[glucosyl-(1->6)-glucoside]	C42H70O16	41.8	-7.40621	HILIC-NEG
HMDB0001961	3.69_310.1153m/z	310.115	3.68648	1,7-Dimethylguanosine	C12H17N5O5	41.9	-1.1121	HILIC-NEG
HMDB0014645	3.44_374.1373m/z	374.137	3.43717	Haloperidol	C21H23ClFNO2	41.9	11.8168	HILIC-NEG
HMDB0038286	9.04_657.1139m/z	657.114	9.03582	Eujambin	C30H26O17	41.9	6.36704	HILIC-NEG
HMDB0062558	7.86_127.0515m/z	127.051	7.8594	Pyroglutamine	C5H8N2O2	41.9	1.43791	HILIC-NEG
208462	8.99_502.2142m/z	502.214	8.98883	Gln Asp Leu Glu	C20H33N5O10	42	-2.43094	HILIC-NEG
HMDB0010571	0.85_719.4862m/z	719.486	0.854167	PG(16:0/16:1(9Z))	C38H73O10P	42	-0.983165	HILIC-NEG
HMDB0028880	6.66_268.1030m/z	268.103	6.65963	Histidinyl-Asparagine	C10H15N5O4	42	-7.92598	HILIC-NEG
HMDB0033587	0.79_429.0787m/z	429.079	0.792833	Coumestrin	C21H18O10	42	-9.39433	HILIC-NEG
HMDB0038681	10.83_497.1718m/z	497.172	10.8279	Musabalbisiane B	C23H30O12	42	10.7429	HILIC-NEG
HMDB0060617	5.37_351.1007m/z	351.101	5.36622	Penicilloic acid	C16H20N2O5S	42	-3.83296	HILIC-NEG
HMDB0028879	10.66_310.1622m/z	310.162	10.6614	Histidinyl-Arginine	C12H21N7O3	42.1	-3.41694	HILIC-NEG
HMDB0029139	2.99_279.1342m/z	279.134	2.98887	Valyl-Tyrosine	C14H20N2O4	42.1	-2.95617	HILIC-NEG
HMDB0029576	2.96_133.0503m/z	133.05	2.9572	2,3-Dihydroxy-2-methylbutanoic acid	C5H10O4	42.1	-2.5468	HILIC-NEG
HMDB0036440	6.23_708.4407m/z	708.441	6.232	Fasciculic acid C	C38H63NO11	42.1	11.068	HILIC-NEG
HMDB0030934	3.28_358.0752m/z	358.075	3.27668	Triglochinin	C14H17NO10	42.2	-7.73142	HILIC-NEG
44171	0.75_339.1986m/z	339.199	0.746667	NORETHINDRONE ACETATE	C22H28O3	42.3	5.84731	HILIC-NEG
45180	9.87_231.0621m/z	231.062	9.86877	Kifunensine	C8H12N2O6	42.3	-0.626684	HILIC-NEG
HMDB0004824	3.95_310.1163m/z	310.116	3.95163	N2,N2-Dimethylguanosine	C12H17N5O5	42.3	2.06468	HILIC-NEG
HMDB0011426	0.90_774.5432m/z	774.543	0.902167	PE(P-18:1(11Z)/22:5(7Z,10Z,13Z,16Z,19Z))	C45H78NO7P	42.3	-1.45813	HILIC-NEG
HMDB0013209	4.00_274.1189m/z	274.119	3.99597	Alanyltryptophan	C14H17N3O3	42.3	-3.10019	HILIC-NEG
HMDB0061043	12.57_831.4152m/z	831.415	12.5716	27-O-demethylrifabutin	C45H60N4O11	42.3	-4.03706	HILIC-NEG
HMDB0000562	1.94_112.0513m/z	112.051	1.94493	Creatinine	C4H7N3O	42.4	-2.96974	HILIC-NEG
HMDB0000639	11.82_209.0299m/z	209.03	11.821	Galactaric acid	C6H10O8	42.4	-1.85853	HILIC-NEG
HMDB0009027	1.17_740.5228m/z	740.523	1.16548	PE(18:1(11Z)/18:2(9Z,12Z))	C41H76NO8P	42.4	-1.07722	HILIC-NEG
HMDB0010647	3.91_773.5342m/z	773.534	3.90763	PG(18:2(9Z,12Z)/18:0)	C42H79O10P	42.4	0.544827	HILIC-NEG
HMDB0062791	8.17_331.1158m/z	331.116	8.17055	(2,3-diphenylcyclopropyl)methyl Phenyl Sulfoxide	C22H20OS	42.4	-1.11884	HILIC-NEG
HMDB0000162	5.15_114.0558m/z	114.056	5.1469	L-Proline	C5H9NO2	42.5	-2.0397	HILIC-NEG
HMDB0006471	12.35_205.0347m/z	205.035	12.3498	Methylisocitric acid	C7H10O7	42.5	-3.067	HILIC-NEG
HMDB0010618	6.66_773.5333m/z	773.533	6.65963	PG(18:1(11Z)/18:1(11Z))	C42H79O10P	42.5	-0.602543	HILIC-NEG
HMDB0061159	9.11_408.1623m/z	408.162	9.11365	N-Carbamoyl glucuronide lorcaserin	C21H28ClNO5	42.5	9.7653	HILIC-NEG
HMDB0041819	2.31_250.0973m/z	250.097	2.31423	7-Aminonitrazepam	C15H13N3O	42.6	-5.20767	HILIC-NEG
HMDB0033699	8.77_246.0978m/z	246.098	8.773	Linamarin	C10H17NO6	42.7	-2.22258	HILIC-NEG
HMDB0126418	6.43_367.1042m/z	367.104	6.42932	3,4,5-trihydroxy-6-[(5-hydroxy-2,2-dimethyl-2H-chromen-7-yl)oxy]oxane-2-carboxylic acid	C17H20O9	42.7	2.13196	HILIC-NEG
HMDB0014935	3.41_159.0922m/z	159.092	3.40783	Tolazoline	C10H12N2	42.8	-3.2711	HILIC-NEG
HMDB0034322	10.78_171.0405m/z	171.041	10.7807	L-alpha-Amino-5-oxo-2(5H)-isoxazolepropanoic acid	C6H8N2O4	42.8	-3.55472	HILIC-NEG
HMDB0126173	1.17_731.2425m/z	731.242	1.16548	6-[(2-{4-[6-carboxy-5-(2,4-dihydroxyphenyl)-3-methylcyclohex-2-en-1-yl]-3,5-dihydroxyphenyl}-7-(3-methylbut-2-en-1-yl)-1-benzofuran-6-yl)oxy]-3,4,5-trihydroxyoxane-2-carboxylic acid	C39H40O14	42.8	10.8523	HILIC-NEG
HMDB0006791	11.17_343.1247m/z	343.125	11.1669	Melibiitol	C12H24O11	42.9	0.328376	HILIC-NEG
HMDB0008959	0.92_714.5077m/z	714.508	0.9185	PE(16:1(9Z)/18:1(11Z))	C39H74NO8P	42.9	-0.314614	HILIC-NEG
HMDB0061739	10.34_462.9603m/z	462.96	10.3438	Perfluorononanoic acid	C9HF17O2	42.9	-6.30709	HILIC-NEG
HMDB0002275	7.34_254.0873m/z	254.087	7.34343	7,8-Dihydroneopterin	C9H13N5O4	43	-8.48857	HILIC-NEG
HMDB0028790	7.93_216.0982m/z	216.098	7.93238	Glutaminylalanine	C8H15N3O4	43	-3.57992	HILIC-NEG
HMDB0028802	10.77_273.1561m/z	273.156	10.766	Glutaminyllysine	C11H22N4O4	43	-2.78049	HILIC-NEG
HMDB0034751	11.94_523.1877m/z	523.188	11.9388	Ligustroside	C25H32O12	43	10.7615	HILIC-NEG
HMDB0041436	12.04_669.2145m/z	669.215	12.0423	Citbismine E	C36H34N2O11	43	8.28653	HILIC-NEG
HMDB0015518	10.68_787.8541m/z	787.854	10.677	Metrizamide	C18H22I3N3O8	43.1	9.20706	HILIC-NEG
HMDB0031254	6.66_400.1439m/z	400.144	6.65963	Margrapine A	C21H23NO7	43.1	9.34321	HILIC-NEG
HMDB0132728	10.69_513.0360m/z	513.036	10.6927	[5-(3-{[3,4-dihydroxy-5-(hydroxymethyl)oxolan-2-yl]oxy}-5,7-dihydroxy-4-oxo-4H-chromen-2-yl)-2-hydroxyphenyl]oxidanesulfonic acid	C20H18O14S	43.1	3.05862	HILIC-NEG
HMDB0011691	6.72_304.0332m/z	304.033	6.7198	Cytidine 2',3'-cyclic phosphate	C9H12N3O7P	43.2	-2.56123	HILIC-NEG
HMDB0015013	10.00_435.1727m/z	435.173	10.0031	Flupenthixol	C23H27F3N2OS	43.2	0.877075	HILIC-NEG
HMDB0015118	0.75_343.1690m/z	343.169	0.746667	Formoterol	C19H24N2O4	43.2	7.71913	HILIC-NEG
HMDB0003229	0.82_253.2168m/z	253.217	0.824167	Palmitoleic acid	C16H30O2	43.3	-1.84564	HILIC-NEG
HMDB0006032	6.08_337.0429m/z	337.043	6.08035	Imidazoleacetic acid ribotide	C10H15N2O9P	43.3	-3.9916	HILIC-NEG
HMDB0014436	7.16_302.0718m/z	302.072	7.15543	Chlorambucil	C14H19Cl2NO2	43.3	-0.742026	HILIC-NEG
HMDB0038613	9.38_293.0809m/z	293.081	9.3758	gamma-L-Glutamyl-L-methionine sulfoxide	C10H18N2O6S	43.3	-1.3848	HILIC-NEG
HMDB0125808	13.25_545.1641m/z	545.164	13.2511	6-{4-[3-(4,5-dihydroxy-7-methoxy-2,2-dimethyl-3,4-dihydro-2H-1-benzopyran-6-yl)-3-oxoprop-1-en-1-yl]phenoxy}-3,4,5-trihydroxyoxane-2-carboxylic acid	C27H30O12	43.3	-4.26407	HILIC-NEG
HMDB0012387	1.32_760.5138m/z	760.514	1.31963	PS(18:1(9Z)/16:0)	C40H76NO10P	43.4	0.525158	HILIC-NEG
HMDB0039930	9.41_503.1730m/z	503.173	9.4068	(S)-Multifidol 2-[apiosyl-(1->6)-glucoside]	C22H32O13	43.4	-7.97666	HILIC-NEG
HMDB0135733	13.27_672.1856m/z	672.186	13.2657	2-amino-4-({1-[(carboxymethyl)-C-hydroxycarbonimidoyl]-2-{[10-hydroxy-3-(2-hydroxy-4-methoxyphenyl)-8,8-dimethyl-2-oxo-2H,8H,9H,10H-pyrano[2,3-h]chromen-9-yl]sulfanyl}ethyl}-C-hydroxycarbonimidoyl)butanoic acid	C31H35N3O12S	43.4	-1.88901	HILIC-NEG
HMDB0012206	12.38_629.1364m/z	629.136	12.3796	CMP-N-glycoloylneuraminate	C20H31N4O17P	43.5	2.3629	HILIC-NEG
HMDB0030043	10.80_499.2029m/z	499.203	10.7964	Isoaustin	C27H32O9	43.5	11.1187	HILIC-NEG
HMDB0128639	7.33_262.0352m/z	262.035	7.32743	2-[(7-hydroxy-1-oxo-1H-isochromen-3-yl)formamido]acetic acid	C12H9NO6	43.5	-1.76271	HILIC-NEG
HMDB0012153	1.41_138.0555m/z	138.056	1.4118	3,4-Dihydroxybenzylamine	C7H9NO2	43.6	-3.83184	HILIC-NEG
HMDB0028956	13.84_273.1923m/z	273.192	13.8407	Lysyl-Lysine	C12H26N4O3	43.6	-3.35114	HILIC-NEG
HMDB0039379	6.44_401.1281m/z	401.128	6.44448	Chrysaloin	C21H22O8	43.6	9.693	HILIC-NEG
HMDB0041222	12.11_457.1567m/z	457.157	12.1145	a-L-Fucopyranosyl-(1->2)-b-D-galactopyranosyl-(1->2)-D-xylose	C17H30O14	43.6	0.847112	HILIC-NEG
HMDB0116524	7.49_787.4573m/z	787.457	7.48658	PGP(a-13:0/i-18:0)	C37H74O13P2	43.6	5.16835	HILIC-NEG
HMDB0029049	7.50_205.0826m/z	205.083	7.50225	Serylthreonine	C7H14N2O5	43.7	-1.84827	HILIC-NEG
HMDB0036903	9.33_523.2242m/z	523.224	9.32897	Gibberellin A38 glucosyl ester	C26H36O11	43.7	10.8815	HILIC-NEG
HMDB0039133	0.79_329.2472m/z	329.247	0.792833	4,8,12,15,19-Docosapentaenoic acid	C22H34O2	43.7	-4.33117	HILIC-NEG
HMDB0041217	9.28_389.1735m/z	389.173	9.28247	Shinflavanone	C25H26O4	43.7	-6.10045	HILIC-NEG
HMDB0062295	2.11_237.0907m/z	237.091	2.11492	15(R)-hydroperoxy-EPE	C8H18N2O4S	43.7	-3.07265	HILIC-NEG
HMDB0126633	13.87_319.0081m/z	319.008	13.8713	3,4,8,9,10-pentahydroxy-6-oxo-6H-benzo[c]chromene-1-carboxylic acid	C14H8O9	43.7	-4.4749	HILIC-NEG
HMDB0001264	9.14_173.0108m/z	173.011	9.14432	Dehydroascorbic acid	C6H6O6	43.8	9.49936	HILIC-NEG
HMDB0029094	9.81_389.1660m/z	389.166	9.81028	Tryptophyl-Tryptophan	C22H22N4O3	43.8	10.5972	HILIC-NEG
HMDB0033098	9.56_429.1168m/z	429.117	9.56245	5,7-Dihydroxy-6-methoxyflavone 5-rhamnoside	C22H22O9	43.8	-5.43059	HILIC-NEG
1060	12.09_313.0519m/z	313.052	12.0858	Malaoxon	C10H19O7PS	43.9	0.703916	HILIC-NEG
HMDB0002183	0.81_327.2322m/z	327.232	0.808667	Docosahexaenoic acid	C22H32O2	43.9	-2.402	HILIC-NEG
HMDB0006293	6.66_119.0343m/z	119.034	6.65963	L-Erythrulose	C4H8O4	43.9	-5.66438	HILIC-NEG
HMDB0060494	7.79_363.1392m/z	363.139	7.78607	N-Acetylmuramoyl-Ala	C14H24N2O9	43.9	-4.64339	HILIC-NEG
HMDB0001248	10.17_784.1502m/z	784.15	10.1676	FAD	C27H33N9O15P2	44	0.387929	HILIC-NEG
HMDB0031094	0.76_301.1651m/z	301.165	0.761667	Glycerol tributanoate	C15H26O6	44	-1.9367	HILIC-NEG
HMDB0034899	9.99_433.1928m/z	433.193	9.98777	1,1'-Ethylidenebistryptophan	C24H26N4O4	44	10.7772	HILIC-NEG
HMDB0062636	13.46_423.0283m/z	423.028	13.4605	Thiamine(1+) Diphosphate(1-)	C12H18N4O7P2S	44	-3.78991	HILIC-NEG
HMDB0034503	10.27_629.3622m/z	629.362	10.2703	2,3,23-Triacetylsericic acid	C36H54O9	44.1	-11.6085	HILIC-NEG
4227	11.21_209.0298m/z	209.03	11.2139	Galactaric acid	C6H10O8	44.2	-2.10943	HILIC-NEG
HMDB0000816	11.78_154.9741m/z	154.974	11.7752	Phosphoglycolic acid	C2H5O6P	44.2	-6.15156	HILIC-NEG
HMDB0028839	9.33_202.0826m/z	202.083	9.32897	Glycyl-Glutamine	C7H13N3O4	44.2	-3.63341	HILIC-NEG
HMDB0029057	6.66_233.0774m/z	233.077	6.65963	Threoninyl-Aspartate	C8H14N2O6	44.2	-2.01972	HILIC-NEG
HMDB0060343	13.75_653.1543m/z	653.154	13.7502	2-(S-Glutathionyl)acetyl glutathione	C22H34N6O13S2	44.2	-1.4895	HILIC-NEG
HMDB0124987	9.67_295.0797m/z	295.08	9.66545	6-(3-ethenylphenoxy)-3,4,5-trihydroxyoxane-2-carboxylic acid	C14H16O7	44.2	-9.00888	HILIC-NEG
HMDB0014698	11.03_331.1237m/z	331.124	11.0314	Zanamivir	C12H20N4O7	44.3	-6.686	HILIC-NEG
HMDB0028686	5.66_217.0824m/z	217.082	5.6567	Alanyl-Glutamic acid	C8H14N2O5	44.3	-2.86332	HILIC-NEG
HMDB0029047	3.72_201.0877m/z	201.088	3.71682	Serylproline	C8H14N2O4	44.3	-2.10437	HILIC-NEG
HMDB0000290	11.35_606.0756m/z	606.076	11.3463	Uridine diphosphate-N-acetylglucosamine	C17H27N3O17P2	44.4	2.18271	HILIC-NEG
HMDB0041917	10.33_495.0400m/z	495.04	10.3289	Lorazepam glucuronide	C21H18Cl2N2O8	44.4	6.52675	HILIC-NEG
362	9.25_218.0671m/z	218.067	9.25215	O-Succinyl-L-homoserine	C8H13NO6	44.5	0.312465	HILIC-NEG
65006	12.78_387.1159m/z	387.116	12.7774	Thr-Phe-OH	C19H20N2O7	44.5	-9.93958	HILIC-NEG
HMDB0001265	9.10_243.0269m/z	243.027	9.09815	Fucose 1-phosphate	C6H13O8P	44.5	-2.66068	HILIC-NEG
HMDB0003337	14.02_611.1463m/z	611.146	14.0232	Oxidized glutathione	C20H32N6O12S2	44.5	2.6566	HILIC-NEG
HMDB0032492	1.41_122.0606m/z	122.061	1.4118	2-Propionylpyrrole	C7H9NO	44.5	-4.67083	HILIC-NEG
HMDB0035232	0.79_232.1702m/z	232.17	0.792833	Rotundine B	C15H23NO	44.5	-2.04	HILIC-NEG
HMDB0041261	14.41_726.1714m/z	726.171	14.4125	Cyanidin 3-(6''-p-coumarylsambubioside)	C35H35O17+	44.5	-11.9942	HILIC-NEG
HMDB0240215	1.24_356.1021m/z	356.102	1.24148	2-Methoxyacetaminophen glucuronide	C15H19NO9	44.5	9.60208	HILIC-NEG
HMDB0041224	11.97_502.1768m/z	502.177	11.9683	beta-D-Galactopyranosyl-(1->4)-2-amino-2-deoxy-beta-D-glucopyranosyl-(1->6)-D-mannose	C18H33NO15	44.6	-1.78725	HILIC-NEG
HMDB0000640	7.34_161.0451m/z	161.045	7.34343	Levoglucosan	C6H10O5	44.7	-2.65819	HILIC-NEG
HMDB0000912	10.26_382.0991m/z	382.099	10.2556	Succinyladenosine	C14H17N5O8	44.7	-3.37291	HILIC-NEG
HMDB0028865	7.12_267.1089m/z	267.109	7.12445	Hydroxyprolyl-Histidine	C11H16N4O4	44.7	-3.59282	HILIC-NEG
HMDB0029048	8.35_191.0668m/z	191.067	8.3457	Serylserine	C6H12N2O5	44.7	-2.80058	HILIC-NEG
HMDB0030159	12.11_333.0219m/z	333.022	12.1145	3,3',4',5,6,7,8-Heptahydroxyflavone	C15H10O9	44.7	-9.80302	HILIC-NEG
HMDB0036893	2.96_379.1413m/z	379.141	2.9572	Gibberellin A75	C19H24O8	44.7	3.83634	HILIC-NEG
HMDB0127463	14.68_647.2031m/z	647.203	14.6763	6-{[2-({4,5-dihydroxy-6-methyl-2-[(3,4,5,6-tetrahydroxyoxan-2-yl)methoxy]oxan-3-yl}oxy)-3,5-dihydroxy-6-methyloxan-4-yl]oxy}-3,4,5-trihydroxyoxane-2-carboxylic acid	C24H40O20	44.7	-1.45703	HILIC-NEG
HMDB0132959	8.16_285.0805m/z	285.08	8.15538	{[1-(4-methoxyphenyl)-4-methylpent-1-en-3-yl]oxy}sulfonic acid	C13H18O5S	44.7	0.845119	HILIC-NEG
HMDB0001069	1.37_357.1287m/z	357.129	1.3663	2-Phenylaminoadenosine	C16H18N6O4	44.8	-8.45043	HILIC-NEG
HMDB0038738	14.28_511.2387m/z	511.239	14.2777	Ethyl 3-hydroxyoctanoate O-[glucosyl-(1->6)-glucoside]	C22H40O13	44.8	-1.77068	HILIC-NEG
HMDB0041299	3.04_325.1063m/z	325.106	3.0357	omega-Hydroxymoracin N	C19H18O5	44.8	-5.81457	HILIC-NEG
HMDB0142963	3.76_146.0817m/z	146.082	3.76232	2-amino-6-hydroxyhexanoic acid	C6H13NO3	44.8	-3.77452	HILIC-NEG
HMDB0000244	2.25_375.1294m/z	375.129	2.25292	Riboflavin	C17H20N4O6	44.9	-4.14478	HILIC-NEG
HMDB0009444	0.90_722.5135m/z	722.514	0.902167	PE(20:4(8Z,11Z,14Z,17Z)/P-16:0)	C41H74NO7P	44.9	0.718487	HILIC-NEG
HMDB0029105	6.43_237.0874m/z	237.087	6.42932	Tyrosyl-Glycine	C11H14N2O4	44.9	-2.90014	HILIC-NEG
HMDB0003764	11.08_217.0826m/z	217.083	11.077	Glutamylalanine	C8H14N2O5	45	-1.90556	HILIC-NEG
HMDB0014385	9.56_407.1654m/z	407.165	9.56245	Alclometasone	C22H29ClO5	45	5.69351	HILIC-NEG
HMDB0041722	0.73_431.0939m/z	431.094	0.7295	Dihydrodaidzein 7-O-glucuronide	C21H20O10	45	-10.4568	HILIC-NEG
224602	12.47_449.1507m/z	449.151	12.4691	Ser Asp Thr Glu	C16H26N4O11	45.1	-4.06822	HILIC-NEG
HMDB0014589	9.58_321.0035m/z	321.004	9.57828	Chloramphenicol	C11H12Cl2N2O5	45.1	-4.69774	HILIC-NEG
HMDB0002354	7.41_290.0675m/z	290.067	7.40758	Hawkinsin	C11H17NO6S	45.3	-10.0677	HILIC-NEG
HMDB0012642	10.86_452.2145m/z	452.215	10.8589	20-Oxo-leukotriene E4	C23H35NO6S	45.3	7.23741	HILIC-NEG
HMDB0029035	11.45_219.0616m/z	219.062	11.4467	Serylaspartic acid	C7H12N2O6	45.4	-2.86548	HILIC-NEG
HMDB0126678	14.37_467.1208m/z	467.121	14.3683	6-[3,4,5-trihydroxy-6-(hydroxymethyl)oxan-2-yl]-2-(2,4,5-trihydroxyphenyl)-3,4-dihydro-2H-1-benzopyran-3,5,7-triol	C21H24O12	45.4	2.68373	HILIC-NEG
HMDB0029033	9.96_260.1356m/z	260.136	9.95743	Serylarginine	C9H19N5O4	45.5	-3.12903	HILIC-NEG
HMDB0039386	11.62_489.1948m/z	489.195	11.6238	Cymorcin diglucoside	C22H34O12	45.5	-5.9892	HILIC-NEG
HMDB0059600	13.18_241.0586m/z	241.059	13.1767	5-phosphonooxy-L-lysine	C6H15N2O6P	45.5	-3.81413	HILIC-NEG
HMDB0015205	7.76_703.3804m/z	703.38	7.7554	Atazanavir	C38H52N6O7	45.6	-2.90067	HILIC-NEG
HMDB0133292	5.57_365.0308m/z	365.031	5.56937	[4-(7-hydroxy-8-methoxy-4-oxo-3,4-dihydro-2H-1-benzopyran-2-yl)phenyl]oxidanesulfonic acid	C16H14O8S	45.6	-7.89884	HILIC-NEG
HMDB0004999	12.57_475.2144m/z	475.214	12.5716	Loperamide	C29H33ClN2O2	45.7	-2.93105	HILIC-NEG
HMDB0009411	1.17_722.5126m/z	722.513	1.16548	PE(20:4(5Z,8Z,11Z,14Z)/P-16:0)	C41H74NO7P	45.7	-0.575625	HILIC-NEG
HMDB0013010	7.39_186.1129m/z	186.113	7.39143	N-Heptanoylglycine	C9H17NO3	45.7	-3.43505	HILIC-NEG
HMDB0060274	14.29_368.9979m/z	368.998	14.2925	Sedoheptulose 1,7-bisphosphate	C7H16O13P2	45.7	-3.99506	HILIC-NEG
65019	9.21_463.1483m/z	463.148	9.20565	TyrMe-Phe-OH	C25H24N2O7	45.8	-5.99422	HILIC-NEG
HMDB0000930	2.30_147.0468m/z	147.047	2.29892	trans-Cinnamic acid	C9H8O2	45.8	11.4572	HILIC-NEG
HMDB0000193	12.69_191.0201m/z	191.02	12.6898	Isocitric acid	C6H8O7	45.9	1.70322	HILIC-NEG
HMDB0060754	14.25_861.4329m/z	861.433	14.247	31-Hydroxy rifabutin	C46H62N4O12	45.9	4.30578	HILIC-NEG
HMDB0062715	11.33_202.0713m/z	202.071	11.332	N-acetyl-L-2-aminoadipate(2-)	C8H13NO5	45.9	-3.94813	HILIC-NEG
HMDB0030398	2.24_337.0614m/z	337.061	2.23758	N-(Carbomethoxyacetyl)-4-S-chlorotryptophan	C15H15ClN2O5	46	5.05856	HILIC-NEG
HMDB0041515	11.18_431.1548m/z	431.155	11.1823	Benzyl gentiobioside	C19H28O11	46	-2.61379	HILIC-NEG
HMDB0060396	6.61_261.0511m/z	261.051	6.6133	5-Fluorouridine	C9H11FN2O6	46	-6.74312	HILIC-NEG
HMDB0060633	13.07_416.1404m/z	416.14	13.0721	N-Acetyl gemifloxacin	C19H20FN5O5	46	6.80543	HILIC-NEG
HMDB0061693	3.05_597.3047m/z	597.305	3.0512	1-Oleoylglycerophosphoinositol	C27H51O12P	46	0.208916	HILIC-NEG
HMDB0094721	6.67_188.0922m/z	188.092	6.67463	4-hydroxyhexanoylglycine	C8H15NO4	46	-3.2872	HILIC-NEG
130508	11.14_501.2663m/z	501.266	11.1354	Glu Ile Asn Lys	C21H38N6O8	46.1	-3.11376	HILIC-NEG
HMDB0000267	9.61_128.0354m/z	128.035	9.60778	Pyroglutamic acid	C5H7NO3	46.1	0.48888	HILIC-NEG
HMDB0001409	9.45_307.0328m/z	307.033	9.4533	dUMP	C9H13N2O8P	46.1	-2.86036	HILIC-NEG
HMDB0012305	10.51_549.0516m/z	549.052	10.5074	UDP-L-rhamnose	C15H24N2O16P2	46.1	-2.2227	HILIC-NEG
HMDB0029086	1.70_316.1652m/z	316.165	1.70212	Tryptophyl-Isoleucine	C17H23N3O3	46.1	-4.49822	HILIC-NEG
HMDB0129219	8.79_571.1307m/z	571.131	8.78783	3-[5,7-dihydroxy-2-(4-hydroxy-3-methoxyphenyl)-4-oxo-3,4-dihydro-2H-1-benzopyran-8-yl]-5,7-dihydroxy-2-(4-hydroxyphenyl)-3,4-dihydro-2H-1-benzopyran-4-one	C31H24O11	46.1	10.7332	HILIC-NEG
HMDB0001401	12.72_259.0219m/z	259.022	12.7188	Glucose 6-phosphate	C6H13O9P	46.2	-2.00908	HILIC-NEG
HMDB0015019	7.76_437.2134m/z	437.213	7.7554	Quinapril	C25H30N2O5	46.2	11.8915	HILIC-NEG
HMDB0028993	4.17_292.1289m/z	292.129	4.17297	Phenylalanyl-Glutamine	C14H19N3O4	46.2	-4.59295	HILIC-NEG
HMDB0031436	14.53_94.9802m/z	94.9802	14.5308	Silicic acid	H4O4Si	46.2	-4.15845	HILIC-NEG
HMDB0037845	7.20_342.1179m/z	342.118	7.20177	N-(1-Deoxy-1-fructosyl)tyrosine	C15H21NO8	46.2	-4.60683	HILIC-NEG
HMDB0038642	10.52_378.1866m/z	378.187	10.5224	Fumitremorgin C	C22H25N3O3	46.2	11.273	HILIC-NEG
HMDB0000212	3.48_220.0820m/z	220.082	3.48117	N-Acetylgalactosamine	C8H15NO6	46.3	-2.77604	HILIC-NEG
HMDB0061695	3.16_571.2878m/z	571.288	3.15868	1-Palmitoylglycerophosphoinositol	C25H49O12P	46.3	-1.88489	HILIC-NEG
HMDB0133951	6.84_359.0982m/z	359.098	6.84163	{[(1E)-5-oxo-1,7-diphenylhept-1-en-4-yl]oxy}sulfonic acid	C19H20O5S	46.3	6.51929	HILIC-NEG
40874	1.20_483.2715m/z	483.271	1.19748	PG(16:0/0:0)[U]	C22H45O9P	46.4	-2.79499	HILIC-NEG
HMDB0010164	1.17_818.5921m/z	818.592	1.16548	PS(18:0/20:0)	C44H86NO10P	46.4	0.512773	HILIC-NEG
HMDB0030096	9.97_620.0998m/z	620.1	9.9726	Cyanidin 3-(3'',6''-dimalonylglucoside)	C27H25O17+	46.4	-3.32622	HILIC-NEG
HMDB0031991	14.49_575.1826m/z	575.183	14.4858	Negletein 6-[rhamnosyl-(1->2)-fucoside]	C28H32O13	46.4	9.61936	HILIC-NEG
HMDB0034903	0.82_195.1387m/z	195.139	0.824167	(3R,3aR,7aS)-3-Butylhexahydro-1(3H)-isobenzofuranone	C12H20O2	46.4	-1.84894	HILIC-NEG
HMDB0062525	12.89_350.1013m/z	350.101	12.8948	S-(2-Hydroxyethyl)glutathione	C12H21N3O7S	46.4	-4.16156	HILIC-NEG
HMDB0112743	0.90_842.5916m/z	842.592	0.902167	PS(22:1(13Z)/18:1(9Z))	C46H86NO10P	46.4	-0.0419972	HILIC-NEG
HMDB0001487	10.28_664.1184m/z	664.118	10.2849	NADH	C21H29N7O14P2	46.5	1.33582	HILIC-NEG
HMDB0004483	11.12_445.1882m/z	445.188	11.1207	Estrone glucuronide	C24H30O8	46.5	3.0755	HILIC-NEG
HMDB0029027	7.31_215.1029m/z	215.103	7.31143	Prolyl-Threonine	C9H16N2O4	46.5	-3.88438	HILIC-NEG
HMDB0029944	12.36_262.0562m/z	262.056	12.3644	Ascorbalamic acid	C9H13NO8	46.5	-2.59011	HILIC-NEG
HMDB0125870	5.00_401.0738m/z	401.074	5.00023	{4-[3-(5-hydroxy-2,2-dimethyl-2H-chromen-6-yl)prop-2-enoyl]phenyl}oxidanesulfonic acid	C20H18O7S	46.5	9.322	HILIC-NEG
HMDB0126023	7.79_303.0499m/z	303.05	7.78607	2-(3,4-dihydroxyphenyl)-5,6,7-trihydroxy-3,4-dihydro-2H-1-benzopyran-4-one	C15H12O7	46.5	-3.66724	HILIC-NEG
HMDB0000086	7.28_256.0945m/z	256.094	7.2796	Glycerophosphocholine	C8H20NO6P	46.6	-4.12627	HILIC-NEG
HMDB0059968	3.36_216.9810m/z	216.981	3.36385	3-hydroxybenzoic acid-3-O-sulphate	C7H6O6S	46.6	-1.07245	HILIC-NEG
HMDB0060510	10.54_391.1341m/z	391.134	10.5376	SN-38	C22H20N2O5	46.6	10.7111	HILIC-NEG
HMDB0112722	1.17_868.6050m/z	868.605	1.16548	PS(22:0/20:3(5Z,8Z,11Z))	C48H88NO10P	46.6	-2.622	HILIC-NEG
228867	9.52_473.2723m/z	473.272	9.5158	Ser Gln Leu Lys	C20H38N6O7	46.7	-1.27115	HILIC-NEG
245487	8.46_402.2338m/z	402.234	8.4647	Val Ser Ala Lys	C17H33N5O6	46.7	-4.9727	HILIC-NEG
HMDB0133150	12.09_411.0198m/z	411.02	12.0858	[2,6-dihydroxy-4-({[2,3,5-trihydroxy-6-(hydroxymethyl)oxan-4-yl]oxy}carbonyl)phenyl]oxidanesulfonic acid	C13H16O13S	46.7	-9.90392	HILIC-NEG
HMDB0001397	11.30_362.0495m/z	362.049	11.3034	Guanosine monophosphate	C10H14N5O8P	46.8	-3.38837	HILIC-NEG
HMDB0001901	7.33_130.0866m/z	130.087	7.32743	Aminocaproic acid	C6H13NO2	46.8	-5.89387	HILIC-NEG
HMDB0029071	6.69_219.0982m/z	219.098	6.68947	Threoninyl-Threonine	C8H16N2O5	46.8	-2.13715	HILIC-NEG
HMDB0059916	10.66_149.0087m/z	149.009	10.6614	2,3-Dihydroxybutanedioic acid	C4H6O6	46.8	-3.288	HILIC-NEG
HMDB0061704	0.93_599.3187m/z	599.319	0.93365	2-Stearoylglycerophosphoinositol	C27H53O12P	46.8	-2.54108	HILIC-NEG
HMDB0014717	8.99_377.0848m/z	377.085	8.98883	Carbenicillin	C17H18N2O6S	46.9	9.26936	HILIC-NEG
HMDB0038923	10.42_517.2246m/z	517.225	10.4177	Cinnamoside	C24H38O12	46.9	-8.62353	HILIC-NEG
HMDB0000784	6.23_187.0970m/z	187.097	6.232	Azelaic acid	C9H16O4	47	-3.09604	HILIC-NEG
HMDB0015492	9.72_272.0077m/z	272.008	9.72345	Stepronin	C10H11NO4S2	47	7.49727	HILIC-NEG
HMDB0112572	1.17_814.5601m/z	814.56	1.16548	PS(20:2(11Z,14Z)/18:0)	C44H82NO10P	47	-0.33899	HILIC-NEG
HMDB0038715	9.91_273.0379m/z	273.038	9.91277	Alloathyriol	C14H10O6	47.1	-9.19434	HILIC-NEG
HMDB0060661	6.77_617.2598m/z	617.26	6.76613	APC	C33H38N4O8	47.1	-2.9848	HILIC-NEG
HMDB0015186	4.35_333.0900m/z	333.09	4.34628	Penicillin G	C16H18N2O4S	47.2	-4.27558	HILIC-NEG
HMDB0038610	9.08_493.2132m/z	493.213	9.08267	Gibberellin A4 glucosyl ester	C25H34O10	47.2	10.6695	HILIC-NEG
HMDB0059923	0.78_515.2634m/z	515.263	0.777833	Cavipetin E isomer 2	C29H40O8	47.2	-3.27044	HILIC-NEG
3489	12.53_346.0543m/z	346.054	12.5276	deoxyguanosine 5'-monophosphate (dGMP)	C10H14N5O7P	47.3	-4.35203	HILIC-NEG
HMDB0028793	11.52_260.0882m/z	260.088	11.5198	Glutaminylaspartic acid	C9H15N3O6	47.3	-2.48887	HILIC-NEG
HMDB0034677	7.77_513.2673m/z	513.267	7.77073	Cinncassiol D1 glucoside	C26H42O10	47.3	-6.23345	HILIC-NEG
HMDB0013220	13.58_320.0623m/z	320.062	13.5764	Beta-Citryl-L-glutamic acid	C11H15NO10	47.4	-0.154534	HILIC-NEG
HMDB0033034	0.73_443.2464m/z	443.246	0.7295	Antibiotic GR 95647X	C26H36O6	47.4	5.68534	HILIC-NEG
HMDB0041412	10.94_741.1880m/z	741.188	10.9367	Quercetin 3-(2Gal-apiosylrobinobioside)	C32H38O20	47.4	-0.537584	HILIC-NEG
HMDB0002005	7.79_164.0382m/z	164.038	7.78607	Methionine sulfoxide	C5H11NO3S	47.5	-3.10398	HILIC-NEG
HMDB0011130	1.41_480.3078m/z	480.308	1.4118	LysoPE(18:0/0:0)	C23H48NO7P	47.5	-3.73055	HILIC-NEG
HMDB0028724	8.91_202.0823m/z	202.082	8.91033	Asparaginyl-Alanine	C7H13N3O4	47.5	-5.10886	HILIC-NEG
HMDB0031958	2.92_441.2334m/z	441.233	2.92487	3-O-Acetylepisamarcandin	C26H34O6	47.5	11.6482	HILIC-NEG
HMDB0060774	12.21_271.0565m/z	271.057	12.2148	5-Carboxy-2'-deoxyuridine	C10H12N2O7	47.5	-2.3371	HILIC-NEG
HMDB0112341	3.05_830.5968m/z	830.597	3.0512	PS(15:0/24:1(15Z))	C45H86NO10P	47.5	6.1973	HILIC-NEG
HMDB0003681	9.56_144.0661m/z	144.066	9.56245	4-Acetamidobutanoic acid	C6H11NO3	47.6	-3.27561	HILIC-NEG
HMDB0036313	8.33_491.2703m/z	491.27	8.33053	Erinacine P	C27H40O8	47.6	10.6623	HILIC-NEG
HMDB0061711	8.66_110.9849m/z	110.985	8.65552	Methylphosphate	CH5O4P	47.6	-3.28655	HILIC-NEG
HMDB0062181	2.31_188.0923m/z	188.092	2.31423	N-lactoyl-Valine	C8H15NO4	47.6	-2.88614	HILIC-NEG
HMDB0133086	0.89_277.1438m/z	277.144	0.886	2-[5-(3,3-dimethyloxiran-2-yl)-3-methylpent-2-en-1-yl]benzene-1,3,5-triol	C16H22O4	47.6	-2.50119	HILIC-NEG
HMDB0133709	9.22_387.1493m/z	387.149	9.22115	3,7,8,15-tetrahydroxy-16,17-dimethoxytricyclo[12.3.1.1Â²,â¶]nonadeca-1(17),2,4,6(19),14(18),15-hexaen-9-one	C21H24O7	47.6	11.3124	HILIC-NEG
HMDB0039852	7.31_457.1662m/z	457.166	7.31143	Deoxynivalenol 3-glucoside	C21H30O11	47.7	-11.6209	HILIC-NEG
HMDB0000220	0.82_255.2330m/z	255.233	0.824167	Palmitic acid	C16H32O2	47.8	0.0226979	HILIC-NEG
HMDB0028976	1.88_261.1276m/z	261.128	1.88293	Methionyl-Isoleucine	C11H22N2O3S	47.8	-0.933996	HILIC-NEG
HMDB0033987	8.46_429.1234m/z	429.123	8.4647	Ononin	C22H22O9	47.8	9.96554	HILIC-NEG
HMDB0112380	6.31_844.6067m/z	844.607	6.30767	PS(18:0/22:1(13Z))	C46H88NO10P	47.8	-0.701264	HILIC-NEG
HMDB0001095	12.19_588.0744m/z	588.074	12.1861	GDP-L-fucose	C16H25N5O15P2	47.9	-0.891158	HILIC-NEG
HMDB0011152	0.92_436.2820m/z	436.282	0.9185	PE(P-16:0e/0:0)	C21H44NO6P	47.9	-3.00974	HILIC-NEG
HMDB0013243	1.59_277.1550m/z	277.155	1.59412	Leucyl-phenylalanine	C15H22N2O3	47.9	-2.81718	HILIC-NEG
HMDB0034913	0.93_287.1395m/z	287.14	0.93365	Imazamethabenz-methyl	C16H20N2O3	47.9	-2.07733	HILIC-NEG
44309	2.25_340.2224m/z	340.222	2.25292	DIPROTIN A	C17H31N3O4	48	-5.17262	HILIC-NEG
HMDB0000157	1.93_135.0318m/z	135.032	1.92943	Hypoxanthine	C5H4N4O	48	4.49149	HILIC-NEG
HMDB0003357	7.26_173.0928m/z	173.093	7.26393	N-Acetylornithine	C7H14N2O3	48	-1.87831	HILIC-NEG
HMDB0028985	8.16_311.1082m/z	311.108	8.15538	Methionyl-Tyrosine	C14H20N2O4S	48	3.56052	HILIC-NEG
HMDB0029737	0.84_144.0450m/z	144.045	0.839167	1H-Indole-3-carboxaldehyde	C9H7NO	48	-3.46378	HILIC-NEG
HMDB0033207	4.30_631.3085m/z	631.309	4.30278	Coagulin R 3-glucoside	C34H48O11	48	-6.12168	HILIC-NEG
HMDB0033563	6.98_335.0759m/z	335.076	6.97545	Juglone glucoside	C16H16O8	48	-4.07846	HILIC-NEG
HMDB0035893	7.22_717.3570m/z	717.357	7.21727	Elaterinide	C38H54O13	48	10.9644	HILIC-NEG
HMDB0041775	11.94_829.2322m/z	829.232	11.9388	Sesaminol 2-O-triglucoside	C36H46O22	48	-10.3414	HILIC-NEG
HMDB0127802	10.36_431.0146m/z	431.015	10.3586	3-hydroxy-2-[3-methoxy-4-(sulfooxy)phenyl]-5-sulfino-3,4-dihydro-2H-1-benzopyran-7-olate	C16H16O10S2	48	7.8885	HILIC-NEG
HMDB0128750	11.94_361.0556m/z	361.056	11.9388	3,5,7-trihydroxy-2-(1-hydroxy-3-methoxy-4-oxocyclohexa-2,5-dien-1-yl)-6-methoxy-4H-chromen-4-one	C17H14O9	48	-2.4466	HILIC-NEG
HMDB0028783	7.93_217.0628m/z	217.063	7.93238	Cysteinyl-Proline	C8H14N2O3S	48.1	-11.2884	HILIC-NEG
HMDB0029055	9.24_274.1511m/z	274.151	9.23665	Threoninyl-Arginine	C10H21N5O4	48.1	-3.47065	HILIC-NEG
HMDB0033463	1.70_263.1395m/z	263.139	1.70212	Subaphylline	C14H20N2O3	48.1	-2.3542	HILIC-NEG
HMDB0133179	0.75_205.1596m/z	205.16	0.746667	2-benzylheptan-1-ol	C14H22O	48.1	-0.827277	HILIC-NEG
HMDB0011341	6.64_700.5274m/z	700.527	6.64448	PEP-16:0/18:1(11Z))	C39H76NO7P	48.2	-1.83638	HILIC-NEG
HMDB0012490	0.87_176.0711m/z	176.071	0.869667	1,2-Dehydrosalsolinol	C10H11NO2	48.2	-3.24604	HILIC-NEG
HMDB0029119	6.43_308.1230m/z	308.123	6.42932	Tyrosyl-Gamma-glutamate	C14H19N3O5	48.2	-7.0813	HILIC-NEG
HMDB0030416	7.79_321.1289m/z	321.129	7.78607	Avenic acid A	C12H22N2O8	48.2	-4.39308	HILIC-NEG
HMDB0032549	0.76_311.1678m/z	311.168	0.761667	N-Undecylbenzenesulfonic acid	C17H28O3S	48.2	-2.77344	HILIC-NEG
HMDB0035784	10.63_563.1814m/z	563.181	10.6299	Aloinoside B	C27H32O13	48.2	7.84655	HILIC-NEG
HMDB0039409	8.46_483.1307m/z	483.131	8.4647	N-[[3-(b-D-Glucopyranosyloxy)-2,3-dihydro-2-oxo-1H-indol-3-yl]acetyl]aspartic acid	C20H24N2O12	48.2	10.4307	HILIC-NEG
HMDB0001196	14.87_779.2475m/z	779.248	14.8671	N,N'-Diacetylchitobiosyldiphosphodolichol	C28H50N2O19P2	48.3	8.31966	HILIC-NEG
HMDB0012433	1.24_810.5290m/z	810.529	1.24148	PS(20:4(5Z,8Z,11Z,14Z)/18:0)	C44H78NO10P	48.3	-0.0447666	HILIC-NEG
HMDB0129412	4.99_383.0633m/z	383.063	4.98557	6-[2-(2H-1,3-benzodioxol-5-yl)-1-carboxy-2-oxoethyl]-3,4,5-trihydroxyoxane-2-carboxylic acid	C16H16O11	48.3	3.43748	HILIC-NEG
HMDB0134608	8.07_580.1649m/z	580.165	8.06738	2-amino-4-({1-[(carboxymethyl)-C-hydroxycarbonimidoyl]-2-{[1-(3,5-dihydroxyphenyl)-2-hydroxy-2-(3-hydroxy-4-methoxyphenyl)ethyl]sulfanyl}ethyl}-C-hydroxycarbonimidoyl)butanoic acid	C25H31N3O11S	48.3	7.29087	HILIC-NEG
HMDB0029030	5.32_213.1239m/z	213.124	5.32188	Prolyl-Valine	C10H18N2O3	48.4	-2.61766	HILIC-NEG
HMDB0000082	14.43_481.9758m/z	481.976	14.4271	Cytidine triphosphate	C9H16N3O14P3	48.5	-3.01706	HILIC-NEG
HMDB0001043	0.81_303.2325m/z	303.232	0.808667	Arachidonic acid	C20H32O2	48.5	-1.64768	HILIC-NEG
HMDB0015109	10.36_291.0830m/z	291.083	10.3586	Edetic Acid	C10H16N2O8	48.5	-1.21854	HILIC-NEG
HMDB0029394	8.35_392.1114m/z	392.111	8.3457	gamma-L-Glutamyl-S-(2-carboxy-1-propyl)cysteinylglycine	C14H23N3O8S	48.5	-4.75579	HILIC-NEG
HMDB0038377	8.97_629.3611m/z	629.361	8.97317	Goshonoside F4	C32H54O12	48.5	10.9296	HILIC-NEG
HMDB0062547	1.10_246.0072m/z	246.007	1.10198	2-Hydroxyacetaminophen sulfate	C8H9NO6S	48.5	-2.44039	HILIC-NEG
HMDB0112552	1.17_842.5908m/z	842.591	1.16548	PS(20:1(11Z)/20:1(11Z))	C46H86NO10P	48.5	-0.966031	HILIC-NEG
HMDB0125514	1.72_209.0450m/z	209.045	1.71762	(2E)-3-(2,4-dihydroxy-5-methoxyphenyl)prop-2-enoic acid	C10H10O5	48.5	-2.56653	HILIC-NEG
HMDB0031031	0.76_325.1831m/z	325.183	0.761667	2-Dodecylbenzenesulfonic acid	C18H30O3S	48.6	-3.5908	HILIC-NEG
HMDB0039576	10.78_791.4148m/z	791.415	10.7807	Lyciumoside II	C38H64O17	48.6	9.80409	HILIC-NEG
HMDB0060327	10.77_495.1209m/z	495.121	10.766	1-Nitro-5-hydroxy-6-glutathionyl-5,6-dihydronaphthalene	C20H24N4O9S	48.6	3.5459	HILIC-NEG
HMDB0112672	0.89_866.5921m/z	866.592	0.886	PS(20:4(8Z,11Z,14Z,17Z)/22:0)	C48H86NO10P	48.6	0.461754	HILIC-NEG
HMDB0000905	9.55_330.0595m/z	330.06	9.54697	Deoxyadenosine monophosphate	C10H14N5O6P	48.7	-4.06862	HILIC-NEG
HMDB0033651	5.26_415.1058m/z	415.106	5.26388	Genistein 4'-rhamnoside	C21H20O9	48.7	5.70703	HILIC-NEG
HMDB0033750	5.91_211.0819m/z	211.082	5.91285	D-Glycero-D-galacto-heptitol	C7H16O7	48.8	-1.82942	HILIC-NEG
HMDB0061022	9.07_407.1922m/z	407.192	9.06698	6-beta-hydroxydexamethasone	C22H29FO6	48.8	11.466	HILIC-NEG
HMDB0240280	9.58_94.9801m/z	94.9801	9.57828	Mesylate	CH4O3S	48.8	-8.20094	HILIC-NEG
HMDB0006591	3.85_340.1232m/z	340.123	3.84948	Lactosamine	C12H23NO10	48.9	-4.99266	HILIC-NEG
HMDB0031411	11.55_159.0770m/z	159.077	11.5495	4-Acetamido-2-aminobutanoic acid	C6H12N2O3	48.9	-3.48252	HILIC-NEG
HMDB0062177	2.68_252.0871m/z	252.087	2.67588	N-lactoyl-Tyrosine	C12H15NO5	48.9	-2.56559	HILIC-NEG
HMDB0112758	0.89_890.5910m/z	890.591	0.886	PS(22:1(13Z)/22:5(7Z,10Z,13Z,16Z,19Z))	C50H86NO10P	48.9	-0.712808	HILIC-NEG
3328	11.21_191.0194m/z	191.019	11.2139	Isocitrate	C6H8O7	49	-1.7326	HILIC-NEG
HMDB0011681	10.61_347.0393m/z	347.039	10.6144	Inosine 2'-phosphate	C10H13N4O8P	49	-1.51264	HILIC-NEG
HMDB0015188	3.48_197.0560m/z	197.056	3.48117	Mimosine	C8H10N2O4	49	-4.08555	HILIC-NEG
HMDB0006555	9.61_331.0450m/z	331.045	9.60778	dIMP	C10H13N4O7P	49.1	0.323157	HILIC-NEG
HMDB0010620	3.92_771.5177m/z	771.518	3.9223	PG(18:1(11Z)/18:2(9Z,12Z))	C42H77O10P	49.1	-0.563425	HILIC-NEG
HMDB0011473	1.49_452.2765m/z	452.276	1.48695	LysoPE(0:0/16:0)	C21H44NO7P	49.1	-3.97149	HILIC-NEG
HMDB0015308	11.20_496.1560m/z	496.156	11.198	Idarubicin	C26H27NO9	49.1	-10.596	HILIC-NEG
HMDB0059786	13.77_874.4177m/z	874.418	13.7654	Gliadorphin	C43H57N9O11	49.1	8.23715	HILIC-NEG
HMDB0060824	7.42_460.1655m/z	460.165	7.4236	Hydromorphone-3-glucuronide	C23H27NO9	49.1	9.04998	HILIC-NEG
HMDB0112345	0.92_790.5593m/z	790.559	0.9185	PS(16:0/20:0)	C42H82NO10P	49.1	-1.38145	HILIC-NEG
HMDB0112732	0.89_892.6056m/z	892.606	0.886	PS(22:0/22:5(7Z,10Z,13Z,16Z,19Z))	C50H88NO10P	49.1	-1.86912	HILIC-NEG
HMDB0129591	8.71_487.1290m/z	487.129	8.71418	3,4,5-trihydroxy-6-{[7-methoxy-3-(3-methoxyphenyl)-8-methyl-4-oxo-4H-chromen-5-yl]oxy}oxane-2-carboxylic acid	C24H24O11	49.1	9.00928	HILIC-NEG
HMDB0029004	3.39_251.1030m/z	251.103	3.39283	Phenylalanyl-Serine	C12H16N2O4	49.3	-3.01813	HILIC-NEG
HMDB0040247	0.78_167.1439m/z	167.144	0.777833	2-Undecenal	C11H20O	49.3	-1.24875	HILIC-NEG
HMDB0001448	11.26_96.9603m/z	96.9603	11.2597	Sulfate	H2O4S	49.4	2.02926	HILIC-NEG
HMDB0014854	14.34_370.0909m/z	370.091	14.3367	Nedocromil	C19H17NO7	49.4	-6.38706	HILIC-NEG
HMDB0015705	3.22_391.2070m/z	391.207	3.21835	Ivacaftor	C24H28N2O3	49.5	10.9119	HILIC-NEG
HMDB0038048	12.29_725.2351m/z	725.235	12.2895	Naringin 6''-rhamnoside	C33H42O18	49.5	7.23946	HILIC-NEG
HMDB0000304	12.39_606.0729m/z	606.073	12.3945	Uridine diphosphate-N-acetylgalactosamine	C17H27N3O17P2	49.6	-2.25275	HILIC-NEG
HMDB0032777	12.53_517.1769m/z	517.177	12.5276	Ciceritol	C19H34O16	49.6	-1.04719	HILIC-NEG
HMDB0059663	0.98_201.0252m/z	201.025	0.97965	5-hydroxy-2-oxo-4-ureido-2,5-dihydro-1H-imidazole-5-carboxylate	C5H6N4O5	49.6	-6.78416	HILIC-NEG
HMDB0029158	11.09_233.0775m/z	233.078	11.0915	gamma-Glutamylserine	C8H14N2O6	49.7	-1.74145	HILIC-NEG
HMDB0030531	1.34_628.3604m/z	628.36	1.3353	Janthitrem G	C39H51NO6	49.7	-6.33032	HILIC-NEG
HMDB0062302	0.87_319.2264m/z	319.226	0.869667	18-Hydroxy-5Z,8Z,11Z,14Z-eicosatetraenoic acid	C20H32O3	49.7	-4.43563	HILIC-NEG
HMDB0060120	0.73_489.2757m/z	489.276	0.7295	10-Hydroxy-octadec-12Z-enoate-9-beta-D-glucuronide	C24H42O10	49.8	10.66	HILIC-NEG
HMDB0037611	6.32_457.2649m/z	457.265	6.32283	Lucidenic acid A	C27H38O6	49.9	11.539	HILIC-NEG
HMDB0038732	7.92_487.2497m/z	487.25	7.9179	alpha-Ionol O-[arabinosyl-(1->6)-glucoside]	C24H40O10	49.9	-10.6526	HILIC-NEG
HMDB0116576	3.94_799.5484m/z	799.548	3.93697	PG(20:1(11Z)/18:2(9Z,12Z))	C44H81O10P	49.9	-1.34593	HILIC-NEG
HMDB0000512	1.73_206.0818m/z	206.082	1.73312	N-Acetyl-L-phenylalanine	C11H13NO3	50	-2.21695	HILIC-NEG
HMDB0011496	1.41_524.2765m/z	524.277	1.4118	LysoPE(0:0/22:6(4Z,7Z,10Z,13Z,16Z,19Z))	C27H44NO7P	50	-3.29977	HILIC-NEG
HMDB0041541	10.77_335.1552m/z	335.155	10.766	N2-Fructopyranosylarginine	C12H24N4O7	50	-6.15324	HILIC-NEG
HMDB0000014	7.12_226.0830m/z	226.083	7.12445	Deoxycytidine	C9H13N3O4	50.1	-1.40788	HILIC-NEG
HMDB0031029	0.85_225.1854m/z	225.185	0.854167	Ethyl (E)-2-dodecenoate	C14H26O2	50.1	-2.842	HILIC-NEG
HMDB0034297	0.87_297.2427m/z	297.243	0.869667	Ricinoleic acid	C18H34O3	50.1	-2.86449	HILIC-NEG
HMDB0000033	9.74_225.0989m/z	225.099	9.73762	Carnosine	C9H14N4O3	50.2	-1.85665	HILIC-NEG
HMDB0000497	9.80_245.0773m/z	245.077	9.79578	5,6-Dihydrouridine	C9H14N2O6	50.2	-2.64852	HILIC-NEG
HMDB0004381	11.81_388.0608m/z	388.061	11.8058	N-Acetylneuraminic acid 9-phosphate	C11H20NO12P	50.2	-10.9736	HILIC-NEG
HMDB0005026	12.26_358.1242m/z	358.124	12.2588	Rabeprazole	C18H21N3O3S	50.2	3.08088	HILIC-NEG
HMDB0029000	6.41_292.1649m/z	292.165	6.41398	Phenylalanyl-Lysine	C15H23N3O3	50.2	-5.9376	HILIC-NEG
HMDB0030643	12.10_329.0301m/z	329.03	12.1001	Blighinone	C16H10O8	50.2	-0.642482	HILIC-NEG
HMDB0006234	14.14_338.9877m/z	338.988	14.1405	1D-Myo-inositol 1,3-bisphosphate	C6H14O12P2	50.3	-3.04518	HILIC-NEG
HMDB0029953	7.42_241.0924m/z	241.092	7.4236	D-erythro-D-galacto-octitol	C8H18O8	50.3	-2.14212	HILIC-NEG
HMDB0032055	3.89_196.0722m/z	196.072	3.89298	N-Acetylhistidine	C8H11N3O3	50.3	-2.7216	HILIC-NEG
HMDB0032764	9.02_273.1197m/z	273.12	9.02017	N2-Succinoylarginine	C10H18N4O5	50.3	-2.60054	HILIC-NEG
HMDB0000133	3.67_282.0841m/z	282.084	3.67182	Guanosine	C10H13N5O5	50.4	-0.906199	HILIC-NEG
HMDB0004813	1.67_257.0775m/z	257.078	1.67112	3-Methyluridine	C10H14N2O6	50.4	-1.56976	HILIC-NEG
HMDB0029123	10.27_231.0980m/z	231.098	10.2703	Valyl-Aspartate	C9H16N2O5	50.4	-2.66874	HILIC-NEG
HMDB0062759	12.95_604.0700m/z	604.07	12.9539	GDP-alpha-D-mannose(2-)	C16H25N5O16P2	50.4	0.210968	HILIC-NEG
5754	6.07_287.0511m/z	287.051	6.06517	Orotidine	C10H12N2O8	50.5	-3.48989	HILIC-NEG
129123	10.51_537.1826m/z	537.183	10.5074	Glu Phe Asp Glu	C23H30N4O11	50.5	-2.3296	HILIC-NEG
264319	5.90_484.2760m/z	484.276	5.89768	Val Leu Ser Pro Ala	C22H39N5O7	50.5	-3.41348	HILIC-NEG
HMDB0030529	1.35_602.3452m/z	602.345	1.3508	Janthitrem E	C37H49NO6	50.5	-5.89215	HILIC-NEG
HMDB0035757	8.80_563.1747m/z	563.175	8.80268	Cascaroside C	C27H32O13	50.5	-4.11596	HILIC-NEG
HMDB0060278	8.77_236.0769m/z	236.077	8.773	Fructoseglycine	C8H15NO7	50.5	-2.65158	HILIC-NEG
HMDB0011352	6.66_722.5122m/z	722.512	6.65963	PE(P-16:0/20:4(5Z,8Z,11Z,14Z))	C41H74NO7P	50.6	-1.10422	HILIC-NEG
HMDB0127816	10.34_401.0047m/z	401.005	10.3438	3-hydroxy-5-sulfino-2-[3-(sulfooxy)phenyl]-3,4-dihydro-2H-1-benzopyran-7-olate	C15H14O9S2	50.6	10.0393	HILIC-NEG
HMDB0000052	12.44_289.1145m/z	289.115	12.4398	Argininosuccinic acid	C10H18N4O6	50.7	-2.93669	HILIC-NEG
HMDB0000121	10.92_440.1317m/z	440.132	10.921	Folic acid	C19H19N7O6	50.7	-1.57662	HILIC-NEG
HMDB0029131	2.10_229.1552m/z	229.155	2.09958	Valyl-Leucine	C11H22N2O3	50.7	-2.44133	HILIC-NEG
HMDB0038882	8.58_281.0870m/z	281.087	8.58202	5-O-beta-D-Xylopyranosyl-L-arabinose	C10H18O9	50.7	-2.75694	HILIC-NEG
HMDB0000132	2.75_150.0418m/z	150.042	2.75072	Guanine	C5H5N5O	50.8	-1.99739	HILIC-NEG
HMDB0001271	13.09_323.0274m/z	323.027	13.0872	Pseudouridine 5'-phosphate	C9H13N2O9P	50.8	-3.57682	HILIC-NEG
HMDB0038776	8.88_517.1394m/z	517.139	8.87917	Medicarpin 3-O-(6'-malonylglucoside)	C25H26O12	50.8	8.28578	HILIC-NEG
HMDB0125627	8.86_421.0643m/z	421.064	8.86367	[4-hydroxy-2,5-bis(hydroxymethyl)-5-{[3,4,5-trihydroxy-6-(hydroxymethyl)oxan-2-yl]oxy}oxolan-3-yl]oxidanesulfonic acid	C12H22O14S	50.8	-3.42276	HILIC-NEG
HMDB0000254	8.26_117.0193m/z	117.019	8.25753	Succinic acid	C4H6O4	50.9	-2.36764e-05	HILIC-NEG
HMDB0006944	9.31_535.1497m/z	535.15	9.31348	1,4-beta-D-Glucan	C18H32O18	50.9	-3.56087	HILIC-NEG
HMDB0011517	0.92_500.2772m/z	500.277	0.9185	LysoPE(20:4(5Z,8Z,11Z,14Z)/0:0)	C25H44NO7P	50.9	-2.20988	HILIC-NEG
3376	3.13_242.0777m/z	242.078	3.12803	Cytidine	C9H13N3O5	51	-2.27363	HILIC-NEG
HMDB0005000	10.75_381.1379m/z	381.138	10.7514	Loratadine	C22H23ClN2O2	51	0.840468	HILIC-NEG
HMDB0009032	1.17_770.5684m/z	770.568	1.16548	PE(18:1(11Z)/20:1(11Z))	C43H82NO8P	51	-2.7974	HILIC-NEG
HMDB0011474	1.53_450.2610m/z	450.261	1.53245	LysoPE(0:0/16:1(9Z))	C21H42NO7P	51	-3.65948	HILIC-NEG
HMDB0037839	8.21_316.1165m/z	316.117	8.21453	N-(1-Deoxy-1-fructosyl)histidine	C12H19N3O7	51	4.79733	HILIC-NEG
HMDB0041597	1.47_465.0996m/z	465.1	1.47212	Glucodistylin	C21H22O12	51	-9.19919	HILIC-NEG
HMDB0059626	11.15_300.0482m/z	300.048	11.1512	N-acetyl-alpha-D-galactosamine 1-phosphate	C8H16NO9P	51	-2.59859	HILIC-NEG
HMDB0060015	0.81_172.9915m/z	172.991	0.808667	Phenol sulphate	C6H6O4S	51	0.299996	HILIC-NEG
HMDB0060493	7.41_292.1035m/z	292.104	7.40758	N-Acetylmuramate	C11H19NO8	51	-0.983673	HILIC-NEG
HMDB0000089	11.81_242.0798m/z	242.08	11.8058	Cytidine	C9H13N3O5	51.1	6.50128	HILIC-NEG
HMDB0000292	2.36_151.0263m/z	151.026	2.3604	Xanthine	C5H4N4O2	51.1	1.13365	HILIC-NEG
HMDB0001200	3.81_235.0715m/z	235.072	3.80598	N'-Formylkynurenine	C11H12N2O4	51.1	-3.75932	HILIC-NEG
HMDB0039750	9.41_544.1885m/z	544.189	9.4068	Lacto-N-triose I	C20H35NO16	51.1	0.36524	HILIC-NEG
HMDB0127230	10.92_401.0854m/z	401.085	10.921	5,6,7-trihydroxy-2-phenyl-8-(3,4,5-trihydroxyoxan-2-yl)-4H-chromen-4-one	C20H18O9	51.1	-6.06185	HILIC-NEG
HMDB0000696	4.35_148.0434m/z	148.043	4.34628	L-Methionine	C5H11NO2S	51.2	-2.36989	HILIC-NEG
HMDB0028742	4.50_317.1238m/z	317.124	4.49977	Asparaginyl-Tryptophan	C15H18N4O4	51.2	-5.40203	HILIC-NEG
HMDB0135246	8.46_459.1337m/z	459.134	8.4647	3,4,5-trihydroxy-6-(2-{[2-methoxy-4-(prop-2-en-1-yl)phenoxy]carbonyl}phenoxy)oxane-2-carboxylic acid	C23H24O10	51.2	8.799	HILIC-NEG
HMDB0000706	8.16_279.0975m/z	279.098	8.15538	Aspartylphenylalanine	C13H16N2O5	51.3	-3.98964	HILIC-NEG
HMDB0001176	11.81_613.1405m/z	613.14	11.8058	Cytidine monophosphate N-acetylneuraminic acid	C20H31N4O16P	51.3	0.819325	HILIC-NEG
HMDB0001262	10.92_503.1601m/z	503.16	10.921	Maltotriose	C18H32O16	51.3	-3.19531	HILIC-NEG
HMDB0010163	1.29_788.5428m/z	788.543	1.2888	PS(18:0/18:1(9Z))	C42H80NO10P	51.3	-2.45455	HILIC-NEG
HMDB0011505	0.92_478.2927m/z	478.293	0.9185	LysoPE(18:1(11Z)/0:0)	C23H46NO7P	51.3	-2.46919	HILIC-NEG
HMDB0028835	10.98_230.1238m/z	230.124	10.9842	Glycyl-Arginine	C8H17N5O3	51.3	-9.0921	HILIC-NEG
HMDB0031876	1.35_247.1191m/z	247.119	1.3508	Prenyl glucoside	C11H20O6	51.3	1.65689	HILIC-NEG
HMDB0037840	5.91_292.1391m/z	292.139	5.91285	N-(1-Deoxy-1-fructosyl)leucine	C12H23NO7	51.3	-3.5358	HILIC-NEG
HMDB0128150	14.01_653.0980m/z	653.098	14.0085	6-(5-{3-[(6-carboxy-3,4,5-trihydroxyoxan-2-yl)oxy]-5,7-dihydroxy-4-oxo-4H-chromen-2-yl}-2-hydroxyphenoxy)-3,4,5-trihydroxyoxane-2-carboxylic acid	C27H26O19	51.3	-2.35581	HILIC-NEG
HMDB0000012	12.20_227.0669m/z	227.067	12.2005	Deoxyuridine	C9H12N2O5	51.4	-2.12911	HILIC-NEG
HMDB0000208	8.71_145.0136m/z	145.014	8.71418	Oxoglutaric acid	C5H6O5	51.4	-4.36746	HILIC-NEG
HMDB0028795	7.52_273.1198m/z	273.12	7.51792	Glutaminylglutamine	C10H18N4O5	51.4	-2.45313	HILIC-NEG
HMDB0039960	5.25_367.1045m/z	367.105	5.24905	3-O-Caffeoyl-4-O-methylquinic acid	C17H20O9	51.4	2.86583	HILIC-NEG
HMDB0060245	12.81_113.0351m/z	113.035	12.8071	L-3-Cyanoalanine	C4H6N2O2	51.4	-5.24458	HILIC-NEG
HMDB0112625	0.90_840.5773m/z	840.577	0.902167	PS(20:3(8Z,11Z,14Z)/20:0)	C46H84NO10P	51.4	1.5827	HILIC-NEG
HMDB0128946	8.60_423.1085m/z	423.109	8.59685	1-hydroxy-2-{9-hydroxy-2-oxo-2H,8H,9H-furo[2,3-h]chromen-8-yl}propan-2-yl (2E)-3-(4-hydroxyphenyl)prop-2-enoate	C23H20O8	51.4	-0.00534961	HILIC-NEG
HMDB0000625	7.64_195.0510m/z	195.051	7.63558	Gluconic acid	C6H12O7	51.5	0.0423341	HILIC-NEG
HMDB0003265	9.31_609.1896m/z	609.19	9.31348	Hesperidin	C28H34O15	51.5	11.6004	HILIC-NEG
HMDB0009050	6.70_726.5430m/z	726.543	6.70463	PE(18:1(11Z)/P-18:1(11Z))	C41H78NO7P	51.5	-1.85951	HILIC-NEG
HMDB0135801	14.22_538.1510m/z	538.151	14.2162	2-amino-4-({1-[(carboxymethyl)-C-hydroxycarbonimidoyl]-2-{[2-hydroxy-2-methoxy-1-(7-methyl-2-oxo-2H-chromen-6-yl)ethyl]sulfanyl}ethyl}-C-hydroxycarbonimidoyl)butanoic acid	C23H29N3O10S	51.5	1.6632	HILIC-NEG
124	9.85_191.0192m/z	191.019	9.8541	Citric acid	C6H8O7	51.6	-2.47977	HILIC-NEG
HMDB0029059	7.92_246.1086m/z	246.109	7.9179	Threoninyl-Glutamine	C9H17N3O5	51.6	-3.79757	HILIC-NEG
HMDB0011668	11.94_340.1249m/z	340.125	11.9388	6-(alpha-D-Glucosaminyl)-1D-myo-inositol	C12H23NO10	51.7	-0.0964431	HILIC-NEG
HMDB0037261	1.26_342.0865m/z	342.087	1.25713	DHBOA-Glc	C14H17NO9	51.7	10.1535	HILIC-NEG
HMDB0037690	12.30_537.1257m/z	537.126	12.3048	Limocitrol 3-glucoside	C24H26O14	51.7	1.36108	HILIC-NEG
HMDB0062573	12.23_565.0461m/z	565.046	12.2291	UDP-D-galactose(2-)	C15H24N2O17P2	51.7	-2.9026	HILIC-NEG
HMDB0000536	13.84_462.0654m/z	462.065	13.8407	Adenylsuccinic acid	C14H18N5O11P	51.8	-2.95276	HILIC-NEG
HMDB0001201	14.46_442.0153m/z	442.015	14.4565	Guanosine diphosphate	C10H15N5O11P2	51.8	-4.0651	HILIC-NEG
HMDB0001902	14.11_698.2166m/z	698.217	14.11	Pteroyltriglutamic acid	C29H33N9O12	51.8	-1.36452	HILIC-NEG
HMDB0032437	10.84_265.0561m/z	265.056	10.8434	Monoglyceride citrate	C9H14O9	51.8	-1.49209	HILIC-NEG
HMDB0037111	0.43_305.0807m/z	305.081	0.434033	Musanolone C	C19H14O4	51.8	-4.15256	HILIC-NEG
HMDB0135655	5.84_325.0905m/z	325.091	5.83585	3,4,5-trihydroxy-6-[4-(3-hydroxyprop-1-en-1-yl)phenoxy]oxane-2-carboxylic acid	C15H18O8	51.8	-7.27879	HILIC-NEG
HMDB0000299	5.99_283.0676m/z	283.068	5.98918	Xanthosine	C10H12N4O6	51.9	-2.76036	HILIC-NEG
HMDB0028858	11.61_244.0945m/z	244.094	11.6093	Hydroxyprolyl-Asparagine	C9H15N3O5	51.9	2.41957	HILIC-NEG
HMDB0112514	3.94_790.5584m/z	790.558	3.93697	PS(20:0/16:0)	C42H82NO10P	51.9	-2.48289	HILIC-NEG
HMDB0000107	4.88_181.0712m/z	181.071	4.88292	Galactitol	C6H14O6	52	-2.94732	HILIC-NEG
HMDB0040814	9.44_533.1814m/z	533.181	9.4378	Isosyringinoside	C23H34O14	52	-11.5386	HILIC-NEG
HMDB0000285	14.25_482.9606m/z	482.961	14.247	Uridine triphosphate	C9H15N2O15P3	52.1	-1.38926	HILIC-NEG
HMDB0001316	13.24_275.0165m/z	275.017	13.2359	6-Phosphogluconic acid	C6H13O10P	52.1	-2.93565	HILIC-NEG
HMDB0002334	15.00_165.0191m/z	165.019	14.9985	Benzoquinoneacetic acid	C8H6O4	52.1	-1.68425	HILIC-NEG
HMDB0011737	12.54_275.0882m/z	275.088	12.5423	gamma-Glutamylglutamic acid	C10H16N2O7	52.1	-1.16987	HILIC-NEG
HMDB0012390	1.29_786.5286m/z	786.529	1.2888	PS(18:1(9Z)/18:1(9Z))	C42H78NO10P	52.1	-0.568581	HILIC-NEG
44712	6.84_130.0619m/z	130.062	6.84163	3-Guanidinopropanoate	C4H9N3O2	52.2	-2.45935	HILIC-NEG
HMDB0000781	2.96_300.0385m/z	300.038	2.9572	N-Acetylgalactosamine 4-sulphate	C8H15NO9S	52.2	-3.34617	HILIC-NEG
HMDB0029044	10.42_232.1298m/z	232.13	10.4177	Seryllysine	C9H19N3O4	52.2	-1.90528	HILIC-NEG
HMDB0029064	3.85_231.1346m/z	231.135	3.84948	Threoninyl-Isoleucine	C10H20N2O4	52.2	-2.01282	HILIC-NEG
HMDB0029156	7.77_293.1132m/z	293.113	7.77073	Glutamylphenylalanine	C14H18N2O5	52.2	-3.67045	HILIC-NEG
HMDB0030419	12.70_261.0721m/z	261.072	12.7043	gamma-Glutamylaspartic acid	C9H14N2O7	52.2	-2.68512	HILIC-NEG
HMDB0130027	5.94_293.0481m/z	293.048	5.94352	6-(1-carboxy-2-methoxy-2-oxoethyl)-3,4,5-trihydroxyoxane-2-carboxylic acid	C10H14O10	52.2	-11.2032	HILIC-NEG
HMDB0000594	7.98_293.1129m/z	293.113	7.97722	gamma-Glutamylphenylalanine	C14H18N2O5	52.3	-4.73202	HILIC-NEG
HMDB0001016	10.91_298.0686m/z	298.069	10.9052	D-4'-Phosphopantothenate	C9H18NO8P	52.3	-3.85407	HILIC-NEG
HMDB0001564	11.52_445.0518m/z	445.052	11.5198	CDP-Ethanolamine	C11H20N4O11P2	52.3	-2.83598	HILIC-NEG
HMDB0004195	9.48_253.0497m/z	253.05	9.48463	5-L-Glutamyl-taurine	C7H14N2O6S	52.3	-1.19731	HILIC-NEG
HMDB0011489	1.46_498.2611m/z	498.261	1.45663	LysoPE(0:0/20:5(5Z,8Z,11Z,14Z,17Z))	C25H42NO7P	52.3	-2.99481	HILIC-NEG
HMDB0030417	13.58_216.0507m/z	216.051	13.5764	Lycoperdic acid	C8H11NO6	52.3	-2.97387	HILIC-NEG
44314	13.89_422.0870m/z	422.087	13.8867	S-(1,2-DICARBOXYETHYL)GLUTATHIONE	C14H21N3O10S	52.4	-1.13248	HILIC-NEG
HMDB0001202	10.54_306.0498m/z	306.05	10.5376	dCMP	C9H14N3O7P	52.4	0.58726	HILIC-NEG
HMDB0029452	4.47_358.1164m/z	358.116	4.4691	L-DOPA 3'-glucoside	C15H21NO9	52.4	5.66903	HILIC-NEG
HMDB0062198	12.23_364.0807m/z	364.081	12.2291	2-S-glutathionyl acetate	C12H19N3O8S	52.4	-3.68731	HILIC-NEG
HMDB0112900	1.17_892.6047m/z	892.605	1.16548	PS(24:0/20:5(5Z,8Z,11Z,14Z,17Z))	C50H88NO10P	52.4	-2.88843	HILIC-NEG
HMDB0000355	8.08_161.0456m/z	161.046	8.08205	3-Hydroxymethylglutaric acid	C6H10O5	52.5	0.047807	HILIC-NEG
HMDB0029066	9.78_246.1452m/z	246.145	9.78112	Threoninyl-Lysine	C10H21N3O4	52.5	-3.02946	HILIC-NEG
HMDB0029403	6.96_259.0911m/z	259.091	6.96078	Oxypinnatanine	C10H16N2O6	52.5	-9.64828	HILIC-NEG
HMDB0038238	6.74_483.2190m/z	483.219	6.7353	Plantaricin BN	C24H36O10	52.5	-9.35457	HILIC-NEG
HMDB0041208	5.13_360.1293m/z	360.129	5.13207	De-O-methylsimmondsin	C15H23NO9	52.5	-2.07638	HILIC-NEG
265	1.26_391.2846m/z	391.285	1.25713	Deoxycholic acid	C24H40O4	52.6	-2.03141	HILIC-NEG
HMDB0000263	11.91_166.9748m/z	166.975	11.9092	Phosphoenolpyruvic acid	C3H5O6P	52.6	-1.79751	HILIC-NEG
HMDB0000812	9.69_174.0410m/z	174.041	9.69495	N-Acetyl-L-aspartic acid	C6H9NO5	52.6	0.950496	HILIC-NEG
HMDB0001373	8.30_686.1410m/z	686.141	8.30087	Dephospho-CoA	C21H35N7O13P2S	52.6	-0.807819	HILIC-NEG
HMDB0028898	6.80_253.1298m/z	253.13	6.79663	Histidinyl-Valine	C11H18N4O3	52.6	-3.18645	HILIC-NEG
HMDB0029395	9.39_320.0909m/z	320.091	9.3913	L-L-Homoglutathione	C11H19N3O6S	52.6	-4.12163	HILIC-NEG
HMDB0029919	8.14_341.1074m/z	341.107	8.14072	Maltulose	C12H22O11	52.6	-4.52668	HILIC-NEG
HMDB0062560	8.89_321.0484m/z	321.048	8.89467	thymidine 3'-monophosphate	C10H15N2O8P	52.6	-2.80583	HILIC-NEG
HMDB0000139	5.66_105.0187m/z	105.019	5.6567	Glyceric acid	C3H6O4	52.7	-5.5213	HILIC-NEG
HMDB0000726	7.39_230.1030m/z	230.103	7.39143	Isovalerylglutamic acid	C10H17NO5	52.7	-1.71963	HILIC-NEG
HMDB0000830	9.42_266.0877m/z	266.088	9.4223	Neuraminic acid	C9H17NO8	52.7	-1.76903	HILIC-NEG
HMDB0006556	5.61_146.0453m/z	146.045	5.61287	L-4-Hydroxyglutamate semialdehyde	C5H9NO4	52.7	-3.71627	HILIC-NEG
HMDB0030669	3.72_367.1046m/z	367.105	3.71682	3-O-Feruloylquinic acid	C17H20O9	52.7	3.20392	HILIC-NEG
HMDB0040503	8.58_431.1385m/z	431.138	8.58202	Pinostrobin 5-glucoside	C22H24O9	52.7	8.57393	HILIC-NEG
HMDB0040692	2.18_307.0821m/z	307.082	2.17625	4R,5R,6S-Trihydroxy-2-hydroxymethyl-2-cyclohexen-1-one 6-(2-hydroxy-6-methylbenzoate)	C15H16O7	52.7	-0.820498	HILIC-NEG
3581	11.40_487.0980m/z	487.098	11.4037	Cytidine diphosphate choline (CDPcholine)	C14H26N4O11P2	52.8	-4.11392	HILIC-NEG
64742	0.98_241.0724m/z	241.072	0.97965	Lumichrome	C12H10N4O2	52.8	-2.93696	HILIC-NEG
HMDB0000828	10.71_175.0357m/z	175.036	10.7075	Ureidosuccinic acid	C5H8N2O5	52.8	-1.94216	HILIC-NEG
HMDB0011671	13.75_620.0190m/z	620.019	13.7502	ADP-ribose 1"-2" cyclic phosphate	C15H22N5O16P3	52.8	-1.81767	HILIC-NEG
HMDB0029068	3.02_265.1184m/z	265.118	3.02003	Threoninyl-Phenylalanine	C13H18N2O4	52.8	-3.84615	HILIC-NEG
44901	0.96_253.1437m/z	253.144	0.964	C75	C14H22O4	52.9	-3.40783	HILIC-NEG
HMDB0000656	13.27_425.0798m/z	425.08	13.2657	Cysteineglutathione disulfide	C13H22N4O8S2	52.9	-1.87296	HILIC-NEG
HMDB0000833	9.42_324.0927m/z	324.093	9.4223	N-Glycolylneuraminic acid	C11H19NO10	52.9	-2.7358	HILIC-NEG
HMDB0001134	12.85_505.9786m/z	505.979	12.8513	Phosphoadenosine phosphosulfate	C10H15N5O13P2S	52.9	-0.601242	HILIC-NEG
HMDB0001491	4.52_246.0201m/z	246.02	4.5151	Pyridoxal 5'-phosphate	C8H10NO6P	52.9	11.318	HILIC-NEG
HMDB0011350	1.58_724.5233m/z	724.523	1.57862	PE(P-16:0/20:3(5Z,8Z,11Z))	C41H76NO7P	52.9	-7.37405	HILIC-NEG
HMDB0028815	10.36_261.0719m/z	261.072	10.3586	Glutamylaspartic acid	C9H14N2O7	52.9	-3.34035	HILIC-NEG
HMDB0031742	10.15_460.1499m/z	460.15	10.1527	4-(2-Nitroethyl)phenyl primeveroside	C19H27NO12	52.9	8.30224	HILIC-NEG
HMDB0036791	0.76_221.1541m/z	221.154	0.761667	Isokobusone	C14H22O2	52.9	-2.84834	HILIC-NEG
HMDB0000044	8.76_175.0245m/z	175.024	8.75817	Ascorbic acid	C6H8O6	53	-1.88589	HILIC-NEG
HMDB0015625	3.95_372.1051m/z	372.105	3.95163	Prasugrel	C20H20FNO3S	53	-6.50276	HILIC-NEG
HMDB0030671	10.92_415.1011m/z	415.101	10.921	Pulmatin	C21H20O9	53	-5.72502	HILIC-NEG
HMDB0033108	7.39_365.1342m/z	365.134	7.39143	Semilepidinoside B	C17H22N2O7	53	-3.24355	HILIC-NEG
HMDB0112255	11.03_119.0166m/z	119.017	11.0314	Allyl methyl sulfone	C4H8O2S	53	-5.49026	HILIC-NEG
HMDB0011170	9.10_259.1290m/z	259.129	9.09815	gamma-Glutamylisoleucine	C11H20N2O5	53.1	-3.6353	HILIC-NEG
HMDB0028837	11.73_189.0517m/z	189.052	11.7296	Glycyl-Aspartate	C6H10N2O5	53.1	-0.142783	HILIC-NEG
HMDB0060030	3.89_397.1142m/z	397.114	3.89298	5-(3',5'-Dihydroxyphenyl)-gamma-valerolactone-O-glucuronide-O-methyl	C18H22O10	53.1	0.549102	HILIC-NEG
HMDB0000195	2.66_267.0737m/z	267.074	2.66105	Inosine	C10H12N4O5	53.2	0.615901	HILIC-NEG
HMDB0000489	10.65_334.1249m/z	334.125	10.6456	Aspartylglycosamine	C12H21N3O8	53.2	-2.05728	HILIC-NEG
HMDB0001342	13.58_480.9803m/z	480.98	13.5764	Thymidine 5'-triphosphate	C10H17N2O14P3	53.2	-3.57926	HILIC-NEG
HMDB0029050	4.10_290.1136m/z	290.114	4.10047	Seryltryptophan	C14H17N3O4	53.2	-3.68787	HILIC-NEG
HMDB0031859	4.97_113.0241m/z	113.024	4.97107	Norfuraneol	C5H6O3	53.2	-3.2144	HILIC-NEG
HMDB0061694	2.49_522.2825m/z	522.282	2.4944	1-Oleoylglycerophosphoserine	C24H46NO9P	53.2	-2.44249	HILIC-NEG
HMDB0129368	3.70_205.0520m/z	205.052	3.70165	1-(6-hydroxy-4-methoxy-1-benzofuran-5-yl)ethan-1-one	C11H10O4	53.2	6.75755	HILIC-NEG
HMDB0000538	13.95_505.9880m/z	505.988	13.9489	Adenosine triphosphate	C10H16N5O13P3	53.3	-0.837629	HILIC-NEG
HMDB0000735	2.91_208.0610m/z	208.061	2.9082	Hydroxyphenylacetylglycine	C10H11NO4	53.3	-2.54007	HILIC-NEG
HMDB0001138	9.56_188.0567m/z	188.057	9.56245	N-Acetylglutamic acid	C7H11NO5	53.3	1.58194	HILIC-NEG
HMDB0001178	11.06_558.0634m/z	558.063	11.0624	Adenosine diphosphate ribose	C15H23N5O14P2	53.3	-1.80381	HILIC-NEG
HMDB0001273	14.46_521.9820m/z	521.982	14.4565	Guanosine triphosphate	C10H16N5O14P3	53.3	-2.68623	HILIC-NEG
HMDB0011649	11.08_333.0593m/z	333.059	11.077	1-(sn-Glycero-3-phospho)-1D-myo-inositol	C9H19O11P	53.3	0.117925	HILIC-NEG
HMDB0028901	6.96_286.1875m/z	286.188	6.96078	Isoleucyl-Arginine	C12H25N5O3	53.3	-3.34723	HILIC-NEG
HMDB0028947	12.39_260.1244m/z	260.124	12.3945	Lysyl-Aspartate	C10H19N3O5	53.3	-3.01244	HILIC-NEG
HMDB0029063	7.96_255.1092m/z	255.109	7.96238	Threoninyl-Histidine	C10H16N4O4	53.3	-2.49297	HILIC-NEG
HMDB0038752	9.78_293.0978m/z	293.098	9.78112	Distichonic acid A	C10H18N2O8	53.3	-4.09935	HILIC-NEG
HMDB0038787	8.91_431.2123m/z	431.212	8.91033	Melleolide B	C24H32O7	53.3	11.123	HILIC-NEG
HMDB0112400	3.10_844.6074m/z	844.607	3.09735	PS(18:1(11Z)/22:0)	C46H88NO10P	53.3	0.086851	HILIC-NEG
HMDB0002062	1.17_248.0226m/z	248.023	1.16548	Norepinephrine sulfate	C8H11NO6S	53.4	-3.52487	HILIC-NEG
HMDB0006730	4.22_608.2348m/z	608.235	4.2163	QYNAD	C25H35N7O11	53.4	4.22813	HILIC-NEG
HMDB0011171	8.33_259.1291m/z	259.129	8.33053	gamma-Glutamylleucine	C11H20N2O5	53.4	-3.34282	HILIC-NEG
HMDB0013646	10.02_753.0847m/z	753.085	10.0178	Adenosine thiamine triphosphate	C22H31N9O13P3S+	53.4	-7.29892	HILIC-NEG
HMDB0028910	1.78_243.1708m/z	243.171	1.77812	Isoleucyl-Isoleucine	C12H24N2O3	53.4	-2.52226	HILIC-NEG
HMDB0029188	8.16_141.0177m/z	141.018	8.15538	5-Hydroxymethyl-2-furanoate	C6H6O4	53.4	-11.1604	HILIC-NEG
HMDB0029417	1.91_176.0383m/z	176.038	1.91393	Cycloalliin	C6H11NO3S	53.4	-1.96442	HILIC-NEG
HMDB0059752	1.17_204.9808m/z	204.981	1.16548	5-Sulfoxymethylfurfural	C6H6O6S	53.4	-1.88739	HILIC-NEG
HMDB0126621	7.23_285.0393m/z	285.039	7.23277	3,5-dihydroxy-2-[(2E)-3-(4-hydroxyphenyl)prop-2-enoyl]cyclohexa-2,5-diene-1,4-dione	C15H10O6	53.4	-4.20866	HILIC-NEG
HMDB0009830	3.95_885.5488m/z	885.549	3.95163	PI(18:1(11Z)/20:3(5Z,8Z,11Z))	C47H83O13P	53.5	-1.18779	HILIC-NEG
HMDB0011173	6.13_187.0722m/z	187.072	6.12583	L-glycyl-L-hydroxyproline	C7H12N2O4	53.5	-1.28111	HILIC-NEG
HMDB0062176	1.73_202.1084m/z	202.108	1.73312	N-lactoyl-Leucine	C9H17NO4	53.5	-0.189077	HILIC-NEG
HMDB0000935	10.57_579.0260m/z	579.026	10.5682	Uridine diphosphate glucuronic acid	C15H22N2O18P2	53.6	-1.68417	HILIC-NEG
HMDB0001254	10.42_258.0376m/z	258.038	10.4177	Glucosamine 6-phosphate	C6H14NO8P	53.6	-3.00916	HILIC-NEG
HMDB0001341	12.50_426.0214m/z	426.021	12.4985	ADP	C10H15N5O10P2	53.6	-1.78831	HILIC-NEG
HMDB0038662	9.22_250.0925m/z	250.092	9.22115	N-(1-Deoxy-1-fructosyl)alanine	C9H17NO7	53.6	-2.94951	HILIC-NEG
HMDB0112349	0.90_818.5927m/z	818.593	0.902167	PS(16:0/22:0)	C44H86NO10P	53.6	1.24292	HILIC-NEG
HMDB0135501	7.95_548.1819m/z	548.182	7.94773	6-{[1-(2-{[3-(3,4-dimethoxyphenyl)-1-hydroxyprop-2-en-1-ylidene]amino}ethyl)-3-methoxy-4-oxocyclohexa-2,5-dien-1-yl]oxy}-3,4,5-trihydroxyoxane-2-carboxylic acid	C26H31NO12	53.6	8.30046	HILIC-NEG
5884	13.50_579.0282m/z	579.028	13.5046	Uridine 5'-diphosphoglucuronic acid	C15H22N2O18P2	53.7	2.05719	HILIC-NEG
HMDB0015221	6.60_577.2613m/z	577.261	6.59763	Deserpidine	C32H38N2O8	53.7	10.01	HILIC-NEG
HMDB0028685	7.67_216.0983m/z	216.098	7.66507	Alanyl-Glutamine	C8H15N3O4	53.7	-3.23264	HILIC-NEG
HMDB0031346	3.64_190.0720m/z	190.072	3.64198	Calystegine C1	C7H13NO5	53.7	-0.339195	HILIC-NEG
HMDB0060067	10.92_429.0563m/z	429.056	10.921	CMP-2-aminoethylphosphonate	C11H20N4O10P2	53.7	-4.29593	HILIC-NEG
HMDB0060461	3.72_113.0240m/z	113.024	3.71682	cis-Acetylacrylate	C5H6O3	53.7	-3.87125	HILIC-NEG
HMDB0000224	8.68_140.0111m/z	140.011	8.68485	O-Phosphoethanolamine	C2H8NO4P	53.8	-5.21655	HILIC-NEG
HMDB0000508	3.39_151.0606m/z	151.061	3.39283	Ribitol	C5H12O5	53.8	-3.75469	HILIC-NEG
HMDB0001067	12.04_303.0833m/z	303.083	12.0423	N-Acetylaspartylglutamic acid	C11H16N2O8	53.8	-0.434011	HILIC-NEG
HMDB0029122	6.67_230.1140m/z	230.114	6.67463	Valyl-Asparagine	C9H17N3O4	53.8	-2.67609	HILIC-NEG
HMDB0112516	3.10_818.5912m/z	818.591	3.09735	PS(20:0/18:0)	C44H86NO10P	53.8	-0.610706	HILIC-NEG
HMDB0000257	10.71_112.9369m/z	112.937	10.7075	Thiosulfate	H2O3S2	53.9	-3.23909	HILIC-NEG
HMDB0014351	6.77_607.2705m/z	607.27	6.76613	Reserpine	C33H40N2O9	53.9	7.20796	HILIC-NEG
HMDB0014925	5.87_224.0778m/z	224.078	5.86685	Aciclovir	C8H11N5O3	53.9	-4.9509	HILIC-NEG
HMDB0029955	3.70_269.0871m/z	269.087	3.70165	D-erythro-L-galacto-Nonulose	C9H18O9	53.9	-2.65186	HILIC-NEG
HMDB0039222	7.34_189.0877m/z	189.088	7.34343	N-(gamma-Glutamyl)ethanolamine	C7H14N2O4	53.9	-1.86585	HILIC-NEG
HMDB0060649	8.74_254.9809m/z	254.981	8.74352	Ascorbic acid-2-sulfate	C6H8O9S	53.9	-2.95354	HILIC-NEG
HMDB0000250	10.83_176.9361m/z	176.936	10.8279	Pyrophosphate	H4O7P2	54	0.905735	HILIC-NEG
HMDB0000289	6.95_167.0208m/z	167.021	6.94612	Uric acid	C5H4N4O3	54	-1.66048	HILIC-NEG
HMDB0005766	10.98_274.1040m/z	274.104	10.9842	Norophthalmic acid	C10H17N3O6	54	-1.53473	HILIC-NEG
HMDB0011639	5.67_210.0383m/z	210.038	5.67137	Topaquinone	C9H9NO5	54	-11.6446	HILIC-NEG
HMDB0028819	11.55_203.0674m/z	203.067	11.5495	Glutamylglycine	C7H12N2O5	54	0.280456	HILIC-NEG
HMDB0028878	8.89_225.0988m/z	225.099	8.89467	Histidinyl-Alanine	C9H14N4O3	54	-2.45028	HILIC-NEG
HMDB0037848	3.07_236.0791m/z	236.079	3.0667	N-(1-Deoxy-1-fructosyl)glycine	C8H15NO7	54	6.64136	HILIC-NEG
HMDB0059660	8.67_214.0489m/z	214.049	8.67018	sn-glycero-3-Phosphoethanolamine	C5H14NO6P	54	1.31561	HILIC-NEG
HMDB0000191	9.84_132.0305m/z	132.03	9.83928	L-Aspartic acid	C4H7NO4	54.1	1.71844	HILIC-NEG
HMDB0000567	3.38_147.0449m/z	147.045	3.37817	Cinnamic acid	C9H8O2	54.1	-1.66396	HILIC-NEG
HMDB0000939	11.98_383.1116m/z	383.112	11.9828	S-Adenosylhomocysteine	C14H20N6O5S	54.1	-6.96984	HILIC-NEG
HMDB0001959	11.18_230.1503m/z	230.15	11.1823	Gamma-Aminobutyryl-lysine	C10H21N3O3	54.1	-2.90513	HILIC-NEG
HMDB0011745	2.33_190.0537m/z	190.054	2.32975	N-Acetyl-L-methionine	C7H13NO3S	54.1	-3.17899	HILIC-NEG
HMDB0028773	6.96_248.0702m/z	248.07	6.96078	Cysteinyl-Glutamine	C8H15N3O4S	54.1	-3.59178	HILIC-NEG
HMDB0028952	5.29_258.1454m/z	258.145	5.2929	Lysyl-Hydroxyproline	C11H21N3O4	54.1	-2.22297	HILIC-NEG
HMDB0029028	4.00_300.1342m/z	300.134	3.99597	Prolyl-Tryptophan	C16H19N3O3	54.1	-3.96401	HILIC-NEG
HMDB0126383	1.75_191.0731m/z	191.073	1.74843	2-(hydroxymethyl)-2-methyl-2H-chromen-5-ol	C11H12O3	54.1	9.22544	HILIC-NEG
HMDB0009421	5.29_764.5248m/z	764.525	5.2929	PE(20:4(8Z,11Z,14Z,17Z)/18:1(11Z))	C43H76NO8P	54.2	1.56494	HILIC-NEG
HMDB0028684	7.28_191.0493m/z	191.049	7.2796	Alanyl-Cysteine	C6H12N2O3S	54.2	-1.55403	HILIC-NEG
HMDB0112724	1.17_866.5904m/z	866.59	1.16548	PS(22:0/20:4(5Z,8Z,11Z,14Z))	C48H86NO10P	54.2	-1.50251	HILIC-NEG
HMDB0000517	11.03_173.1044m/z	173.104	11.0314	L-Arginine	C6H14N4O2	54.3	0.069923	HILIC-NEG
HMDB0011477	1.49_476.2763m/z	476.276	1.48695	LysoPE(0:0/18:2(9Z,12Z))	C23H44NO7P	54.3	-4.20032	HILIC-NEG
HMDB0028968	3.28_262.0884m/z	262.088	3.27668	Methionyl-Asparagine	C9H17N3O4S	54.3	6.53529	HILIC-NEG
HMDB0033624	2.33_181.0501m/z	181.05	2.32975	(Â±)-2-Hydroxy-3-(2-hydroxyphenyl)propanoic acid	C9H10O4	54.3	-2.97559	HILIC-NEG
HMDB0035291	4.03_187.0415m/z	187.041	4.0258	Isoplumbagin	C11H8O3	54.3	7.43948	HILIC-NEG
HMDB0037843	8.77_280.1034m/z	280.103	8.773	N-(1-Deoxy-1-fructosyl)threonine	C10H19NO8	54.3	-1.37803	HILIC-NEG
HMDB0112526	1.17_840.5757m/z	840.576	1.16548	PS(20:0/20:3(5Z,8Z,11Z))	C46H84NO10P	54.3	-0.357175	HILIC-NEG
HMDB0240253	2.68_166.0176m/z	166.018	2.67588	N-Acetyltaurine	C4H9NO4S	54.3	-2.15701	HILIC-NEG
HMDB0000230	8.52_308.0988m/z	308.099	8.52402	N-Acetylneuraminic acid	C11H19NO9	54.4	0.469344	HILIC-NEG
HMDB0000744	9.93_133.0145m/z	133.014	9.9276	Malic acid	C4H6O5	54.4	1.69018	HILIC-NEG
HMDB0001066	12.27_378.0957m/z	378.096	12.2741	S-Lactoylglutathione	C13H21N3O8S	54.4	-5.1168	HILIC-NEG
HMDB0001431	4.50_167.0823m/z	167.082	4.49977	Pyridoxamine	C8H12N2O2	54.4	-1.83851	HILIC-NEG
HMDB0001532	13.66_489.9915m/z	489.991	13.663	Deoxyadenosine triphosphate	C10H16N5O12P3	54.4	-4.2198	HILIC-NEG
HMDB0002641	5.13_163.0398m/z	163.04	5.13207	2-Hydroxycinnamic acid	C9H8O3	54.4	-1.80085	HILIC-NEG
HMDB0004096	1.58_204.0660m/z	204.066	1.57862	5-Methoxyindoleacetate	C11H11NO3	54.4	-3.22073	HILIC-NEG
HMDB0012422	1.26_812.5432m/z	812.543	1.25713	PS(20:3(8Z,11Z,14Z)/18:0)	C44H80NO10P	54.4	-1.89965	HILIC-NEG
HMDB0028827	10.74_243.0979m/z	243.098	10.7367	Glutamylproline	C10H16N2O5	54.4	-3.21131	HILIC-NEG
HMDB0029013	11.03_229.0828m/z	229.083	11.0314	Prolyl-Aspartate	C9H14N2O5	54.4	-1.03857	HILIC-NEG
HMDB0029776	9.05_472.1478m/z	472.148	9.05148	Dhurrin 6'-glucoside	C20H27NO12	54.4	3.70297	HILIC-NEG
HMDB0033903	1.41_150.0561m/z	150.056	1.4118	3alpha,4,7,7alpha-Tetrahydro-1H-isoindole-1,3(2H)-dione	C8H9NO2	54.4	0.241112	HILIC-NEG
HMDB0060173	11.17_154.0269m/z	154.027	11.1669	N-Methylethanolaminium phosphate	C3H10NO4P	54.4	-3.79689	HILIC-NEG
HMDB0112715	3.63_842.5907m/z	842.591	3.627	PS(22:0/18:2(9Z,12Z))	C46H86NO10P	54.4	-1.07895	HILIC-NEG
HMDB0000168	6.41_131.0458m/z	131.046	6.41398	L-Asparagine	C4H8N2O3	54.5	-3.46164	HILIC-NEG
HMDB0006794	12.36_226.0353m/z	226.035	12.3644	5-(2'-Carboxyethyl)-4,6-Dihydroxypicolinate	C9H9NO6	54.5	-1.95299	HILIC-NEG
HMDB0028903	9.28_245.1136m/z	245.114	9.28247	Isoleucyl-Aspartate	C10H18N2O5	54.5	-3.00553	HILIC-NEG
HMDB0029418	12.03_236.0230m/z	236.023	12.0273	S-Cysteinosuccinic acid	C7H11NO6S	54.5	-2.00482	HILIC-NEG
HMDB0000125	11.03_306.0753m/z	306.075	11.0314	Glutathione	C10H17N3O6S	54.6	-4.05244	HILIC-NEG
HMDB0000279	11.71_275.1243m/z	275.124	11.7142	Saccharopine	C11H20N2O6	54.6	-2.16289	HILIC-NEG
HMDB0001508	12.09_410.0256m/z	410.026	12.0858	dADP	C10H15N5O9P2	54.6	-3.83019	HILIC-NEG
HMDB0012301	11.92_535.0356m/z	535.036	11.9237	UDP-D-apiose	C14H22N2O16P2	54.6	-2.95834	HILIC-NEG
HMDB0030852	0.82_285.0762m/z	285.076	0.824167	Asperxanthone	C16H14O5	54.6	-2.29991	HILIC-NEG
HMDB0000709	11.03_296.0372m/z	296.037	11.0314	L-Cysteinylglycine disulfide	C8H15N3O5S2	54.7	-2.78691	HILIC-NEG
HMDB0003882	6.93_357.0878m/z	357.088	6.93128	N1-(5-Phospho-a-D-ribosyl)-5,6-dimethylbenzimidazole	C14H19N2O7P	54.7	5.74444	HILIC-NEG
HMDB0028821	11.12_283.1038m/z	283.104	11.1207	Glutamylhistidine	C11H16N4O5	54.7	-3.32093	HILIC-NEG
HMDB0029954	8.16_239.0769m/z	239.077	8.15538	D-glycero-L-galacto-Octulose	C8H16O8	54.7	-1.56673	HILIC-NEG
HMDB0060509	11.71_289.0325m/z	289.032	11.7142	Sedoheptulose 1-phosphate	C7H15O10P	54.7	-1.87288	HILIC-NEG
HMDB0000060	4.96_101.0239m/z	101.024	4.95642	Acetoacetic acid	C4H6O3	54.8	-4.60341	HILIC-NEG
HMDB0000099	11.58_221.0602m/z	221.06	11.5797	L-Cystathionine	C7H14N2O4S	54.8	0.0162216	HILIC-NEG
HMDB0000296	1.93_243.0625m/z	243.063	1.92943	Uridine	C9H12N2O6	54.8	0.999836	HILIC-NEG
HMDB0000301	7.83_137.0348m/z	137.035	7.8304	Urocanic acid	C6H6N2O2	54.8	-6.46997	HILIC-NEG
HMDB0000867	6.60_165.0400m/z	165.04	6.59763	Ribonic acid	C5H10O6	54.8	-2.96689	HILIC-NEG
HMDB0001533	11.73_456.1619m/z	456.162	11.7296	5,10-Methylene-THF	C20H23N7O6	54.8	-3.90051	HILIC-NEG
HMDB0028810	5.00_244.1293m/z	244.129	5.00023	Glutaminylvaline	C10H19N3O4	54.8	-3.85907	HILIC-NEG
HMDB0033106	9.68_321.1290m/z	321.129	9.68012	N6-Galacturonyl-L-lysine	C12H22N2O8	54.8	-4.27562	HILIC-NEG
HMDB0040545	8.83_415.1436m/z	415.144	8.83283	4'-Methylliquiritigenin 7-rhamnoside	C22H24O8	54.8	9.01168	HILIC-NEG
34531	2.46_524.2975m/z	524.297	2.46323	L-a-Lysophosphatidylserine	C24H48NO9P	54.9	-3.67224	HILIC-NEG
HMDB0000446	5.26_187.1082m/z	187.108	5.26388	N-Alpha-acetyllysine	C8H16N2O3	54.9	-3.09185	HILIC-NEG
HMDB0011163	12.79_247.0568m/z	247.057	12.7926	L-beta-aspartyl-L-aspartic acid	C8H12N2O7	54.9	-1.66687	HILIC-NEG
HMDB0000176	9.34_115.0035m/z	115.003	9.34447	Maleic acid	C4H4O4	55	-1.57476	HILIC-NEG
HMDB0000516	3.73_179.0559m/z	179.056	3.73198	Beta-D-Glucose	C6H12O6	55	-1.1145	HILIC-NEG
HMDB0005831	11.08_261.0354m/z	261.035	11.077	Sorbitol-6-phosphate	C6H15O9P	55	-10.1345	HILIC-NEG
HMDB0006695	3.36_227.1030m/z	227.103	3.36385	Prolylhydroxyproline	C10H16N2O4	55	-2.99411	HILIC-NEG
HMDB0032523	8.26_99.0083m/z	99.0083	8.25753	Succinic anhydride	C4H4O3	55	-5.08022	HILIC-NEG
97	11.35_402.9936m/z	402.994	11.3463	Uridine diphosphate (UDP)	C9H14N2O12P2	55.1	-3.16348	HILIC-NEG
HMDB0000126	10.11_171.0066m/z	171.007	10.1069	Glycerol 3-phosphate	C3H9O6P	55.1	1.1776	HILIC-NEG
HMDB0028912	7.44_258.1822m/z	258.182	7.43943	Isoleucyl-Lysine	C12H25N3O3	55.1	-0.502895	HILIC-NEG
HMDB0034681	8.58_263.0767m/z	263.077	8.58202	3-Hydroxy-4-butanolide	C10H16O8	55.1	-1.9547	HILIC-NEG
HMDB0060244	11.82_168.0431m/z	168.043	11.821	Phosphodimethylethanolamine	C4H12NO4P	55.1	-0.193286	HILIC-NEG
HMDB0000127	9.17_193.0349m/z	193.035	9.17482	D-Glucuronic acid	C6H10O7	55.2	-2.65199	HILIC-NEG
HMDB0000539	6.93_165.0400m/z	165.04	6.93128	Arabinonic acid	C5H10O6	55.2	-2.72651	HILIC-NEG
HMDB0003831	5.87_180.0655m/z	180.065	5.86685	Beta-Tyrosine	C9H11NO3	55.2	-6.39534	HILIC-NEG
HMDB0029436	8.93_201.0507m/z	201.051	8.92617	Penmacric acid	C7H10N2O5	55.2	-4.75539	HILIC-NEG
HMDB0060176	9.50_168.9808m/z	168.981	9.50013	(S)-3-Sulfonatolactate	C3H6O6S	55.2	-2.61098	HILIC-NEG
HMDB0061148	6.96_118.0513m/z	118.051	6.96078	Hydroxyethyl glycine	C4H9NO3	55.2	2.42797	HILIC-NEG
HMDB0062755	12.44_363.0330m/z	363.033	12.4398	5'-xanthylate(2-)	C10H13N4O9P	55.2	-4.65085	HILIC-NEG
HMDB0112517	1.17_816.5758m/z	816.576	1.16548	PS(20:0/18:1(11Z))	C44H84NO10P	55.2	-0.222255	HILIC-NEG
HMDB0000206	6.84_187.1083m/z	187.108	6.84163	N6-Acetyl-L-lysine	C8H16N2O3	55.3	-2.68164	HILIC-NEG
HMDB0032293	5.77_238.0926m/z	238.093	5.7747	N-Gluconyl ethanolamine	C8H17NO7	55.3	-2.52138	HILIC-NEG
HMDB0034688	0.79_289.0861m/z	289.086	0.792833	2,3-Dihydro-2,3-dihydroxy-9-phenyl-1H-phenalen-1-one	C19H14O3	55.3	-3.28753	HILIC-NEG
HMDB0034782	0.79_187.0070m/z	187.007	0.792833	Benzyl sulfate	C7H8O4S	55.3	-0.290068	HILIC-NEG
HMDB0059921	11.84_238.8909m/z	238.891	11.8361	Trimetaphosphoric acid	H3O9P3	55.3	-3.57376	HILIC-NEG
HMDB0112733	1.17_890.5906m/z	890.591	1.16548	PS(22:0/22:6(4Z,7Z,10Z,13Z,16Z,19Z))	C50H86NO10P	55.3	-1.14526	HILIC-NEG
HMDB0112742	3.05_842.5905m/z	842.59	3.0512	PS(22:1(13Z)/18:1(11Z))	C46H86NO10P	55.3	-1.39749	HILIC-NEG
HMDB0126536	8.01_299.0963m/z	299.096	8.00788	{[(6Z)-7-hydroxy-6-(phenylmethylidene)heptan-2-yl]oxy}sulfonic acid	C14H20O5S	55.3	1.45924	HILIC-NEG
HMDB0000045	14.13_346.0540m/z	346.054	14.1253	Adenosine monophosphate	C10H14N5O7P	55.4	-5.27213	HILIC-NEG
HMDB0001125	9.78_241.0109m/z	241.011	9.78112	Inositol cyclic phosphate	C6H11O8P	55.4	-4.05669	HILIC-NEG
HMDB0001128	6.86_228.0297m/z	228.03	6.85645	5-Phosphoribosylamine	C5H12NO7P	55.4	7.91872	HILIC-NEG
HMDB0001274	13.58_401.0139m/z	401.014	13.5764	dTDP	C10H16N2O11P2	55.4	-4.40576	HILIC-NEG
HMDB0028694	3.54_235.1079m/z	235.108	3.53933	Alanyl-Phenylalanine	C12H16N2O3	55.4	-3.89836	HILIC-NEG
HMDB0003331	10.11_280.1030m/z	280.103	10.1069	1-Methyladenosine	C11H15N5O4	55.5	-7.69232	HILIC-NEG
HMDB0004207	11.79_274.1400m/z	274.14	11.7905	Glutamyllysine	C11H21N3O5	55.5	-3.03767	HILIC-NEG
HMDB0029106	8.17_293.1128m/z	293.113	8.17055	Tyrosyl-Hydroxyproline	C14H18N2O5	55.5	-4.93544	HILIC-NEG
HMDB0029121	7.77_272.1718m/z	272.172	7.77073	Valyl-Arginine	C11H23N5O3	55.5	-3.78952	HILIC-NEG
HMDB0029159	10.77_247.0927m/z	247.093	10.766	gamma-Glutamylthreonine	C9H16N2O6	55.5	-3.60487	HILIC-NEG
HMDB0038069	11.73_503.0817m/z	503.082	11.7296	Gomphrenol 3-methylether 4'-glucuronide	C23H20O13	55.5	-2.78942	HILIC-NEG
HMDB0240292	8.16_225.0608m/z	225.061	8.15538	2,3,4,5,6,7-Hexahydroxyheptanoic acid	C7H14O8	55.5	-3.38808	HILIC-NEG
HMDB0000409	1.59_131.0708m/z	131.071	1.59412	(5R)-5-Hydroxyhexanoic acid	C6H12O3	55.6	-4.20914	HILIC-NEG
HMDB0000807	11.84_184.9851m/z	184.985	11.8361	3-Phosphoglyceric acid	C3H7O7P	55.6	-2.96846	HILIC-NEG
HMDB0003869	12.24_274.1401m/z	274.14	12.2436	Epsilon-(gamma-Glutamyl)-lysine	C11H21N3O5	55.6	-2.86089	HILIC-NEG
HMDB0034879	12.88_307.1500m/z	307.15	12.8803	1-[(5-Amino-5-carboxypentyl)amino]-1-deoxyfructose	C12H24N2O7	55.6	-3.53088	HILIC-NEG
HMDB0060478	11.14_242.0778m/z	242.078	11.1354	gamma-Glutamyl-beta-cyanoalanine	C9H13N3O5	55.6	-1.81946	HILIC-NEG
HMDB0112411	3.94_816.5753m/z	816.575	3.93697	PS(18:1(9Z)/20:0)	C44H84NO10P	55.6	-0.838511	HILIC-NEG
HMDB0000177	7.36_154.0617m/z	154.062	7.35943	L-Histidine	C6H9N3O2	55.7	-3.17631	HILIC-NEG
HMDB0000187	7.93_104.0353m/z	104.035	7.93238	L-Serine	C3H7NO3	55.7	-0.466198	HILIC-NEG
HMDB0002031	11.74_145.0625m/z	145.063	11.7445	Ureidoisobutyric acid	C5H10N2O3	55.7	4.36673	HILIC-NEG
HMDB0006592	9.99_544.1869m/z	544.187	9.98777	Lacto-N-triaose	C20H35NO16	55.7	-2.60273	HILIC-NEG
HMDB0028825	9.21_277.0841m/z	277.084	9.20565	Glutamylmethionine	C10H18N2O5S	55.7	-8.31628	HILIC-NEG
HMDB0028846	11.51_202.1193m/z	202.119	11.505	Glycyl-Lysine	C8H17N3O3	55.7	-2.09863	HILIC-NEG
HMDB0029061	7.06_175.0719m/z	175.072	7.06312	Threoninyl-Glycine	C6H12N2O4	55.7	-2.91552	HILIC-NEG
HMDB0000034	14.13_134.0467m/z	134.047	14.1253	Adenine	C5H5N5	55.8	-3.84197	HILIC-NEG
HMDB0000071	2.05_251.0776m/z	251.078	2.05325	Deoxyinosine	C10H12N4O4	55.8	-3.88744	HILIC-NEG
HMDB0000345	8.58_161.0457m/z	161.046	8.58202	3-Hydroxyadipic acid	C6H10O5	55.8	0.820823	HILIC-NEG
HMDB0011354	3.97_720.4959m/z	720.496	3.96632	PE(P-16:0/20:5(5Z,8Z,11Z,14Z,17Z))	C41H72NO7P	55.8	-2.02832	HILIC-NEG
HMDB0012710	3.55_189.0401m/z	189.04	3.55383	3-Dehydroquinate	C7H10O6	55.8	-1.67526	HILIC-NEG
HMDB0028797	8.57_202.0817m/z	202.082	8.56752	Glutaminylglycine	C7H13N3O4	55.8	-8.17655	HILIC-NEG
HMDB0028990	4.39_278.1137m/z	278.114	4.39228	Phenylalanyl-Asparagine	C13H17N3O4	55.8	-3.28049	HILIC-NEG
HMDB0029053	7.80_232.0934m/z	232.093	7.80123	Serinyl-Gamma-glutamate	C8H15N3O5	55.8	-2.31191	HILIC-NEG
HMDB0033601	0.78_211.1338m/z	211.134	0.777833	Dihydrojasmonic acid	C12H20O3	55.8	-0.619616	HILIC-NEG
HMDB0039948	12.09_203.1028m/z	203.103	12.0858	3,4-Dihydroxy-2-hydroxymethyl-1-pyrrolidinepropanamide	C8H16N2O4	55.8	-4.54268	HILIC-NEG
HMDB0040912	1.34_373.1238m/z	373.124	1.3353	N-[(5-Hydroxy-2-pyridinyl)methyl]adenosine	C16H18N6O5	55.8	-7.48626	HILIC-NEG
257	6.63_130.0511m/z	130.051	6.62897	Trans-4-Hydroxy-L-proline	C5H9NO3	55.9	0.943765	HILIC-NEG
34478	10.02_346.0558m/z	346.056	10.0178	Adenosine monophosphate	C10H14N5O7P	55.9	0.0957898	HILIC-NEG
HMDB0000295	11.87_402.9933m/z	402.993	11.8657	Uridine 5'-diphosphate	C9H14N2O12P2	55.9	-3.89569	HILIC-NEG
HMDB0010329	5.00_328.1057m/z	328.106	5.00023	Dopamine glucuronide	C14H19NO8	55.9	5.86425	HILIC-NEG
HMDB0012368	1.32_758.4976m/z	758.498	1.31963	PS(16:1(9Z)/18:1(9Z))	C40H74NO10P	55.9	-0.2583	HILIC-NEG
HMDB0028681	10.12_244.1406m/z	244.141	10.1224	Alanyl-Arginine	C9H19N5O3	55.9	-3.79082	HILIC-NEG
HMDB0032622	9.07_429.1731m/z	429.173	9.06698	Phenethyl rutinoside	C20H30O10	55.9	-8.231	HILIC-NEG
HMDB0038489	8.58_341.1084m/z	341.108	8.58202	Allolactose	C12H22O11	55.9	-1.41959	HILIC-NEG
HMDB0112518	3.61_816.5753m/z	816.575	3.61217	PS(20:0/18:1(9Z))	C44H84NO10P	55.9	-0.899354	HILIC-NEG
HMDB0000156	12.26_133.0136m/z	133.014	12.2588	L-Malic acid	C4H6O5	56	-4.47605	HILIC-NEG
HMDB0000884	10.02_257.0772m/z	257.077	10.0178	Ribothymidine	C10H14N2O6	56	-2.8153	HILIC-NEG
HMDB0001542	7.31_382.1336m/z	382.134	7.31143	N-Acetyllactosamine	C14H25NO11	56	-4.84686	HILIC-NEG
HMDB0037844	6.69_278.1234m/z	278.123	6.68947	N-(1-Deoxy-1-fructosyl)valine	C11H21NO7	56	-3.86381	HILIC-NEG
HMDB0112713	3.63_844.6069m/z	844.607	3.627	PS(22:0/18:1(11Z))	C46H88NO10P	56	-0.43402	HILIC-NEG
HMDB0000114	4.85_214.0485m/z	214.049	4.85308	Glycerylphosphorylethanolamine	C5H14NO6P	56.1	-0.25177	HILIC-NEG
HMDB0000197	0.87_174.0556m/z	174.056	0.869667	Indoleacetic acid	C10H9NO2	56.1	-2.83661	HILIC-NEG
HMDB0000226	3.41_155.0093m/z	155.009	3.40783	Orotic acid	C5H4N2O4	56.1	-3.25543	HILIC-NEG
HMDB0000660	8.58_179.0558m/z	179.056	8.58202	D-Fructose	C6H12O6	56.1	-1.65369	HILIC-NEG
HMDB0001112	11.56_168.9902m/z	168.99	11.5642	D-Glyceraldehyde 3-phosphate	C3H7O6P	56.1	-3.44049	HILIC-NEG
HMDB0001353	8.14_177.0399m/z	177.04	8.14072	2-Keto-3-deoxy-D-gluconic acid	C6H10O6	56.1	-3.37938	HILIC-NEG
HMDB0039173	12.62_665.2137m/z	665.214	12.6158	3-beta-Glucosylcellotriose	C24H42O21	56.1	-1.28258	HILIC-NEG
HMDB0000288	13.50_323.0277m/z	323.028	13.5046	Uridine 5'-monophosphate	C9H13N2O9P	56.2	-2.88146	HILIC-NEG
HMDB0000670	10.83_187.1191m/z	187.119	10.8279	Homo-L-arginine	C7H16N4O2	56.2	-5.25301	HILIC-NEG
HMDB0030287	2.96_275.0943m/z	275.094	2.9572	10-Acetoxytoxol	C15H16O5	56.2	6.47593	HILIC-NEG
HMDB0060365	3.55_129.0184m/z	129.018	3.55383	2,5-Dioxopentanoate	C5H6O4	56.2	-6.80182	HILIC-NEG
HMDB0000321	6.66_161.0452m/z	161.045	6.65963	2-Hydroxyadipic acid	C6H10O5	56.3	-2.3127	HILIC-NEG
HMDB0000444	12.70_111.0086m/z	111.009	12.7043	3-Furoic acid	C5H4O3	56.3	-1.32008	HILIC-NEG
HMDB0000904	8.49_174.0876m/z	174.088	8.49437	Citrulline	C6H13N3O3	56.3	-4.46409	HILIC-NEG
HMDB0000968	10.26_338.9874m/z	338.987	10.2556	1D-Myo-inositol 1,4-bisphosphate	C6H14O12P2	56.3	-3.91457	HILIC-NEG
HMDB0011676	12.34_147.0294m/z	147.029	12.3351	D-Xylono-1,5-lactone	C5H8O5	56.3	-3.26589	HILIC-NEG
HMDB0001844	4.96_131.0342m/z	131.034	4.95642	Methylsuccinic acid	C5H8O4	56.4	-6.17031	HILIC-NEG
HMDB0003498	10.66_259.0216m/z	259.022	10.6614	Beta-D-Glucose 6-phosphate	C6H13O9P	56.4	-3.21389	HILIC-NEG
HMDB0014118	5.79_112.9851m/z	112.985	5.78968	Trifluoroacetic acid	C2HF3O2	56.4	-4.26206	HILIC-NEG
HMDB0028727	11.51_246.0725m/z	246.073	11.505	Asparaginyl-Aspartic acid	C8H13N3O6	56.4	-2.5294	HILIC-NEG
HMDB0000148	12.04_146.0450m/z	146.045	12.0423	L-Glutamic acid	C5H9NO4	56.5	-5.92263	HILIC-NEG
HMDB0000462	2.24_157.0363m/z	157.036	2.23758	Allantoin	C4H6N4O3	56.5	-2.75582	HILIC-NEG
HMDB0000613	5.94_135.0298m/z	135.03	5.94352	Erythronic acid	C4H8O5	56.5	-0.500793	HILIC-NEG
HMDB0001003	8.93_426.0113m/z	426.011	8.92617	Adenosine phosphosulfate	C10H14N5O10PS	56.5	-3.21297	HILIC-NEG
HMDB0033453	6.92_146.0818m/z	146.082	6.91595	Fagomine	C6H13NO3	56.5	-2.99751	HILIC-NEG
HMDB0060390	0.82_151.0396m/z	151.04	0.824167	4-Hydroxyphenyl acetate	C8H8O3	56.5	-2.79234	HILIC-NEG
HMDB0000095	11.81_322.0436m/z	322.044	11.8058	Cytidine monophosphate	C9H14N3O8P	56.6	-3.1016	HILIC-NEG
HMDB0000158	5.13_180.0666m/z	180.067	5.13207	L-Tyrosine	C9H11NO3	56.6	0.0596054	HILIC-NEG
HMDB0000532	3.85_116.0346m/z	116.035	3.84948	Acetylglycine	C4H7NO3	56.6	-5.73057	HILIC-NEG
HMDB0000870	7.95_110.0720m/z	110.072	7.94773	Histamine	C5H9N3	56.6	-3.34013	HILIC-NEG
HMDB0001155	12.35_755.0737m/z	755.074	12.3498	Diadenosine triphosphate	C20H27N10O16P3	56.6	-1.21889	HILIC-NEG
HMDB0011129	0.92_480.3080m/z	480.308	0.9185	LysoPE(0:0/18:0)	C23H48NO7P	56.6	-3.26083	HILIC-NEG
HMDB0011718	0.85_121.0289m/z	121.029	0.854167	4-Hydroxybenzaldehyde	C7H6O2	56.6	-4.54254	HILIC-NEG
HMDB0030091	7.34_178.0718m/z	178.072	7.34343	beta-D-Glucosamine	C6H13NO5	56.6	-1.77687	HILIC-NEG
HMDB0031843	0.89_183.1387m/z	183.139	0.886	2,3-Undecanedione	C11H20O2	56.6	-1.97461	HILIC-NEG
HMDB0033977	4.96_85.0291m/z	85.0291	4.95642	Methyl acrylate	C4H6O2	56.6	-4.29727	HILIC-NEG
HMDB0125202	8.60_221.0667m/z	221.067	8.59685	(3,4,5,6-tetrahydroxyoxan-2-yl)methyl acetate	C8H14O7	56.6	0.0937237	HILIC-NEG
HMDB0000017	1.17_182.0455m/z	182.046	1.16548	4-Pyridoxic acid	C8H9NO4	56.7	-1.89021	HILIC-NEG
HMDB0000251	6.63_124.0069m/z	124.007	6.62897	Taurine	C2H7NO3S	56.7	-3.68972	HILIC-NEG
HMDB0000622	7.36_131.0344m/z	131.034	7.35943	Ethylmalonic acid	C5H8O4	56.7	-4.40727	HILIC-NEG
HMDB0001321	10.97_199.0009m/z	199.001	10.9684	D-Erythrose 4-phosphate	C4H9O7P	56.7	-2.13641	HILIC-NEG
HMDB0003903	3.00_124.9910m/z	124.991	3.00453	2-Hydroxyethanesulfonate	C2H6O4S	56.7	-3.00983	HILIC-NEG
HMDB0004980	13.87_638.0296m/z	638.03	13.8713	cis-4-Decenoic acid	C15H24N5O17P3	56.7	-1.76096	HILIC-NEG
HMDB0028692	10.66_216.1349m/z	216.135	10.6614	Alanyl-Lysine	C9H19N3O3	56.7	-2.19872	HILIC-NEG
HMDB0029140	2.96_215.1395m/z	215.139	2.9572	Valyl-Valine	C10H20N2O3	56.7	-2.90014	HILIC-NEG
HMDB0041561	4.94_161.0452m/z	161.045	4.94175	D-1,5-Anhydrofructose	C6H10O5	56.7	-2.14513	HILIC-NEG
HMDB0059753	7.00_149.0450m/z	149.045	7.00445	2-Deoxypentonic acid	C5H10O5	56.7	-3.55932	HILIC-NEG
HMDB0112392	6.29_816.5752m/z	816.575	6.2925	PS(18:1(11Z)/20:0)	C44H84NO10P	56.7	-0.932258	HILIC-NEG
HMDB0112512	2.75_760.5129m/z	760.513	2.75072	PS(20:0/14:1(9Z))	C40H76NO10P	56.7	-0.61025	HILIC-NEG
4100	0.78_138.0190m/z	138.019	0.777833	4-Nitrophenol	C6H5NO3	56.8	-4.5349	HILIC-NEG
HMDB0000134	8.88_115.0032m/z	115.003	8.87917	Fumaric acid	C4H4O4	56.8	-3.80439	HILIC-NEG
HMDB0000894	2.18_142.0504m/z	142.05	2.17625	Vinylacetylglycine	C6H9NO3	56.8	-3.97168	HILIC-NEG
HMDB0002261	1.17_243.1959m/z	243.196	1.16548	2-Hydroxymyristic acid	C14H28O3	56.8	-2.90019	HILIC-NEG
HMDB0003269	9.78_179.0457m/z	179.046	9.78112	Nicotinuric acid	C8H8N2O3	56.8	-2.59835	HILIC-NEG
HMDB0009385	1.17_738.5076m/z	738.508	1.16548	PE(20:4(5Z,8Z,11Z,14Z)/16:0)	C41H74NO8P	56.8	-0.437924	HILIC-NEG
HMDB0011756	1.98_172.0974m/z	172.097	1.97577	N-Acetylleucine	C8H15NO3	56.8	-3.16175	HILIC-NEG
HMDB0012140	4.53_147.0669m/z	147.067	4.5306	(R) 2,3-Dihydroxy-3-methylvalerate	C6H12O4	56.8	4.17428	HILIC-NEG
HMDB0028767	11.20_260.0882m/z	260.088	11.198	Aspartyl-Gamma-glutamate	C9H15N3O6	56.8	-2.22885	HILIC-NEG
HMDB0094716	8.77_160.0612m/z	160.061	8.773	hydroxybutyrylglycine	C6H11NO4	56.8	-2.09373	HILIC-NEG
3453	10.33_323.0288m/z	323.029	10.3289	Uridine monophosphate (UMP)	C9H13N2O9P	56.9	0.539746	HILIC-NEG
HMDB0000050	13.83_266.0884m/z	266.088	13.8254	Adenosine	C10H13N5O4	56.9	-3.86133	HILIC-NEG
HMDB0003219	4.45_209.0663m/z	209.066	4.45378	Sedoheptulose	C7H14O7	56.9	-1.63208	HILIC-NEG
HMDB0006294	1.13_271.2271m/z	271.227	1.13398	16-Hydroxy hexadecanoic acid	C16H32O3	56.9	-2.8766	HILIC-NEG
HMDB0011174	4.42_227.1396m/z	227.14	4.42295	Isoleucylproline	C11H20N2O3	56.9	-2.20642	HILIC-NEG
HMDB0028695	5.31_185.0927m/z	185.093	5.30738	Alanyl-Proline	C8H14N2O3	56.9	-2.52174	HILIC-NEG
HMDB0035359	7.38_162.0768m/z	162.077	7.37543	1-Deoxynojirimycin	C6H13NO4	56.9	-2.38487	HILIC-NEG
HMDB0037842	10.68_266.0873m/z	266.087	10.677	N-(1-Deoxy-1-fructosyl)serine	C9H17NO8	56.9	-2.95981	HILIC-NEG
HMDB0060348	8.76_157.0138m/z	157.014	8.75817	2-Maleylacetate	C6H6O5	56.9	-3.02506	HILIC-NEG
HMDB0000159	5.32_164.0711m/z	164.071	5.32188	L-Phenylalanine	C9H11NO2	57	-3.72797	HILIC-NEG
HMDB0000472	3.11_219.0772m/z	219.077	3.11268	5-Hydroxy-L-tryptophan	C11H12N2O3	57	-1.34079	HILIC-NEG
HMDB0001014	3.23_155.0458m/z	155.046	3.23302	4-Imidazolone-5-propionic acid	C6H8N2O3	57	-2.60977	HILIC-NEG
HMDB0006833	9.16_131.0345m/z	131.035	9.15948	2-Acetolactate	C5H8O4	57	-3.40629	HILIC-NEG
HMDB0029032	7.31_175.0721m/z	175.072	7.31143	Serylalanine	C6H12N2O4	57	-1.72584	HILIC-NEG
HMDB0060467	11.56_259.0224m/z	259.022	11.5642	D-fructose 1-phosphate	C6H13O9P	57	-0.277392	HILIC-NEG
144	8.16_179.0563m/z	179.056	8.15538	myo-Inositol	C6H12O6	57.1	0.993235	HILIC-NEG
HMDB0033747	9.33_160.0610m/z	160.061	9.32897	(Â±)-2,2'-Iminobispropanoic acid	C6H11NO4	57.1	-3.14903	HILIC-NEG
HMDB0061890	11.55_185.0564m/z	185.056	11.5495	Pyroglutamylglycine	C7H10N2O4	57.1	-2.21765	HILIC-NEG
HMDB0094713	4.38_201.1239m/z	201.124	4.37695	N-Acetylisoputreanine	C9H18N2O3	57.1	-2.57149	HILIC-NEG
HMDB0112953	0.92_716.5227m/z	716.523	0.9185	PE-NMe(15:0/18:1(9Z))	C39H76NO8P	57.1	-1.22063	HILIC-NEG
HMDB0000929	3.41_203.0826m/z	203.083	3.40783	L-Tryptophan	C11H12N2O2	57.2	0.231658	HILIC-NEG
HMDB0028951	10.42_202.1193m/z	202.119	10.4177	Lysyl-Glycine	C8H17N3O3	57.2	-2.12641	HILIC-NEG
HMDB0038663	9.21_264.1081m/z	264.108	9.20565	D-1-[(3-Carboxypropyl)amino]-1-deoxyfructose	C10H19NO7	57.2	-2.93242	HILIC-NEG
HMDB0062660	10.11_160.0611m/z	160.061	10.1069	N-methyl-L-glutamic Acid	C6H11NO4	57.2	-2.54923	HILIC-NEG
HMDB0000227	4.87_147.0670m/z	147.067	4.86808	Mevalonic acid	C6H12O4	57.3	5.06939	HILIC-NEG
HMDB0029046	3.70_251.1034m/z	251.103	3.70165	Serylphenylalanine	C12H16N2O4	57.3	-1.2969	HILIC-NEG
HMDB0029132	8.39_244.1660m/z	244.166	8.39053	Valyl-Lysine	C11H23N3O3	57.3	-2.7066	HILIC-NEG
HMDB0062175	1.69_236.0927m/z	236.093	1.68662	N-lactoyl-Phenylalanine	C12H15NO4	57.3	-0.732743	HILIC-NEG
101	11.05_662.1029m/z	662.103	11.0472	Nicotinamide adenine dinucleotide (NAD)	C21H27N7O14P2	57.4	1.54868	HILIC-NEG
HMDB0000337	4.96_119.0347m/z	119.035	4.95642	(S)-3,4-Dihydroxybutyric acid	C4H8O4	57.4	-2.19282	HILIC-NEG
HMDB0000701	2.84_172.0974m/z	172.097	2.84453	Hexanoylglycine	C8H15NO3	57.5	-3.20811	HILIC-NEG
HMDB0004701	0.87_295.2268m/z	295.227	0.869667	9,10-Epoxyoctadecenoic acid	C18H32O3	57.5	-3.50741	HILIC-NEG
HMDB0013311	4.96_143.0345m/z	143.035	4.95642	trans-2-Hexenedioic acid	C6H8O4	57.6	-3.13213	HILIC-NEG
HMDB0000766	9.69_130.0506m/z	130.051	9.69495	N-Acetyl-L-alanine	C5H9NO3	57.7	-2.74227	HILIC-NEG
HMDB0001870	1.46_121.0293m/z	121.029	1.45663	Benzoic acid	C7H6O2	57.7	-1.57721	HILIC-NEG
HMDB0002059	1.17_215.1647m/z	215.165	1.16548	12-Hydroxydodecanoic acid	C12H24O3	57.7	-2.54946	HILIC-NEG
HMDB0003459	7.19_159.0770m/z	159.077	7.18627	D-Alanyl-D-alanine	C6H12N2O3	57.7	-2.96118	HILIC-NEG
HMDB0006790	5.79_253.0922m/z	253.092	5.78968	Galactosylglycerol	C9H18O8	57.7	-2.5927	HILIC-NEG
HMDB0009477	0.92_720.4974m/z	720.497	0.9185	PE(20:5(5Z,8Z,11Z,14Z,17Z)/P-16:0)	C41H72NO7P	57.7	0.0301141	HILIC-NEG
HMDB0028888	5.88_267.1455m/z	267.146	5.88235	Histidinyl-Isoleucine	C12H20N4O3	57.7	-2.80095	HILIC-NEG
2202	1.41_168.0667m/z	168.067	1.4118	Pyridoxine (Vitamin B6)	C8H11NO3	57.8	0.392371	HILIC-NEG
HMDB0000641	7.31_145.0613m/z	145.061	7.31143	L-Glutamine	C5H10N2O3	57.8	-3.8855	HILIC-NEG
HMDB0013233	9.14_129.0189m/z	129.019	9.14432	Gamma-delta-Dioxovaleric acid	C5H6O4	57.8	-3.01036	HILIC-NEG
HMDB0028885	9.55_211.0832m/z	211.083	9.54697	Histidinyl-Glycine	C8H12N4O3	57.8	-2.17739	HILIC-NEG
HMDB0000329	1.17_163.0759m/z	163.076	1.16548	2-Phenylbutyric acid	C10H12O2	57.9	-3.30971	HILIC-NEG
HMDB0000652	10.91_476.0708m/z	476.071	10.9052	Chondroitin 4-sulfate	C14H23NO15S	57.9	-1.53447	HILIC-NEG
HMDB0000965	6.55_108.0126m/z	108.013	6.55148	Hypotaurine	C2H7NO2S	57.9	0.714398	HILIC-NEG
HMDB0001548	10.54_229.0114m/z	229.011	10.5376	D-Ribose 5-phosphate	C5H11O8P	57.9	-2.02023	HILIC-NEG
102	13.75_742.0681m/z	742.068	13.7502	Nicotinamide Adenine Dinucleotide Phosphate (NADP+)	C21H28N7O17P3	58	-0.108587	HILIC-NEG
HMDB0011172	8.93_245.1136m/z	245.114	8.92617	gamma-Glutamylvaline	C10H18N2O5	58	-2.92539	HILIC-NEG
HMDB0001173	1.24_296.0818m/z	296.082	1.24148	5'-Methylthioadenosine	C11H15N5O3S	58.2	-1.52798	HILIC-NEG
HMDB0000271	7.39_88.0404m/z	88.0404	7.39143	Sarcosine	C3H7NO2	58.3	0.166797	HILIC-NEG
HMDB0000529	0.87_197.1544m/z	197.154	0.869667	5Z-Dodecenoic acid	C12H22O2	58.3	-1.72842	HILIC-NEG
HMDB0029010	11.03_185.0927m/z	185.093	11.0314	Prolyl-Alanine	C8H14N2O3	58.3	-2.38196	HILIC-NEG
HMDB0059708	1.15_201.1128m/z	201.113	1.14965	2-Ethylsuberic acid	C10H18O4	58.3	-2.13991	HILIC-NEG
HMDB0000714	1.98_178.0505m/z	178.051	1.97577	Hippuric acid	C9H9NO3	58.4	-2.56015	HILIC-NEG
6151	10.94_259.0217m/z	259.022	10.9367	D-Myoinositol 4-phosphate	C6H13O9P	58.6	-2.84722	HILIC-NEG
HMDB0000273	1.37_241.0826m/z	241.083	1.3663	Thymidine	C10H14N2O5	58.6	-1.48237	HILIC-NEG
HMDB0013245	1.85_192.0668m/z	192.067	1.85243	m-Methylhippuric acid	C10H11NO3	58.6	1.19118	HILIC-NEG
HMDB0000210	14.23_218.1031m/z	218.103	14.232	Pantothenic acid	C9H17NO5	58.8	-1.37373	HILIC-NEG

## Sheet: Total 
Table S2. All 2679 identified metabolites from all samples by four analysis modes
		RPLC-POS							RPLC-NEG							HILIC-POS							HILIC-NEG
Metabolite ID	Identification times	Metabolic feature	m/z	RT (min)	Metabolite name	Formula	Score	Mass Error (ppm)	Metabolic feature	m/z	RT (min)	Metabolite name	Formula	Score	Mass Error (ppm)	Metabolic feature	m/z	RT (min)	Metabolite name	Formula	Score	Mass Error (ppm)	Metabolic feature	m/z	RT (min)	Metabolite name	Formula	Score	Mass Error (ppm)
HMDB0130027	4	3.08_295.0640m/z	295.064	3.1	6-(1-carboxy-2-methoxy-2-oxoethyl)-3,4,5-trihydroxyoxane-2-carboxylic acid	C10H14O10	47.4	-6.7	2.45_293.0509m/z	293.051	2.4512	6-(1-carboxy-2-methoxy-2-oxoethyl)-3,4,5-trihydroxyoxane-2-carboxylic acid	C10H14O10	52.9	-1.92986	1.80_295.0650m/z	295.065	1.79735	6-(1-carboxy-2-methoxy-2-oxoethyl)-3,4,5-trihydroxyoxane-2-carboxylic acid	C10H14O10	50.6	-3.35834	5.94_293.0481m/z	293.048	5.94352	6-(1-carboxy-2-methoxy-2-oxoethyl)-3,4,5-trihydroxyoxane-2-carboxylic acid	C10H14O10	52.2	-11.2032
HMDB0060661	4	7.95_619.2741m/z	619.274	7.9	APC	C33H38N4O8	43.1	-3.5	8.22_617.2610m/z	617.261	8.22135	APC	C33H38N4O8	44.4	-1.12801	6.35_619.2736m/z	619.274	6.35173	APC	C33H38N4O8	45.4	-4.33576	6.77_617.2598m/z	617.26	6.76613	APC	C33H38N4O8	47.1	-2.9848
HMDB0060617	4	8.04_353.1164m/z	353.116	8	Penicilloic acid	C16H20N2O5S	51.3	-0.6	8.24_351.1011m/z	351.101	8.23618	Penicilloic acid	C16H20N2O5S	44.3	-2.6831	2.81_353.1158m/z	353.116	2.81295	Penicilloic acid	C16H20N2O5S	50.7	-2.17464	5.37_351.1007m/z	351.101	5.36622	Penicilloic acid	C16H20N2O5S	42	-3.83296
HMDB0059660	4	1.23_216.0621m/z	216.062	1.2	sn-glycero-3-Phosphoethanolamine	C5H14NO6P	48.2	-4.8	0.86_214.0483m/z	214.048	0.8568	sn-glycero-3-Phosphoethanolamine	C5H14NO6P	54.9	-1.29417	8.32_216.0630m/z	216.063	8.31962	sn-glycero-3-Phosphoethanolamine	C5H14NO6P	49.3	-0.842178	8.67_214.0489m/z	214.049	8.67018	sn-glycero-3-Phosphoethanolamine	C5H14NO6P	54	1.31561
HMDB0039386	4	3.35_491.2080m/z	491.208	3.4	Cymorcin diglucoside	C22H34O12	45.9	-8.7	0.96_489.1926m/z	489.193	0.962133	Cymorcin diglucoside	C22H34O12	41.1	-10.5412	11.35_491.2092m/z	491.209	11.3509	Cymorcin diglucoside	C22H34O12	45.6	-6.28562	11.62_489.1948m/z	489.195	11.6238	Cymorcin diglucoside	C22H34O12	45.5	-5.9892
HMDB0037844	4	2.12_280.1372m/z	280.137	2.1	N-(1-Deoxy-1-fructosyl)valine	C11H21NO7	49.3	-6.6	0.98_278.1238m/z	278.124	0.977467	N-(1-Deoxy-1-fructosyl)valine	C11H21NO7	53.3	-2.68513	6.28_280.1377m/z	280.138	6.28407	N-(1-Deoxy-1-fructosyl)valine	C11H21NO7	47.6	-4.86598	6.69_278.1234m/z	278.123	6.68947	N-(1-Deoxy-1-fructosyl)valine	C11H21NO7	56	-3.86381
HMDB0037840	4	5.77_294.1537m/z	294.154	5.8	N-(1-Deoxy-1-fructosyl)leucine	C12H23NO7	54	-3.4	2.58_292.1393m/z	292.139	2.58453	N-(1-Deoxy-1-fructosyl)leucine	C12H23NO7	49.8	-3.02653	5.50_294.1535m/z	294.154	5.49528	N-(1-Deoxy-1-fructosyl)leucine	C12H23NO7	52.9	-4.07486	5.91_292.1391m/z	292.139	5.91285	N-(1-Deoxy-1-fructosyl)leucine	C12H23NO7	51.3	-3.5358
HMDB0032055	4	5.75_198.0868m/z	198.087	5.8	N-Acetylhistidine	C8H11N3O3	49.8	-2.5	3.68_196.0724m/z	196.072	3.67897	N-Acetylhistidine	C8H11N3O3	49.7	-1.78945	4.14_198.0865m/z	198.087	4.14437	N-Acetylhistidine	C8H11N3O3	51.1	-4.14788	3.89_196.0722m/z	196.072	3.89298	N-Acetylhistidine	C8H11N3O3	50.3	-2.7216
HMDB0031346	4	5.69_192.0851m/z	192.085	5.7	Calystegine C1	C7H13NO5	42.1	-7.8	1.87_190.0717m/z	190.072	1.87173	Calystegine C1	C7H13NO5	56.7	-2.29523	3.32_192.0855m/z	192.085	3.32175	Calystegine C1	C7H13NO5	43	-6.04616	3.64_190.0720m/z	190.072	3.64198	Calystegine C1	C7H13NO5	53.7	-0.339195
HMDB0029106	4	6.67_295.1279m/z	295.128	6.7	Tyrosyl-Hydroxyproline	C14H18N2O5	48.3	-3.1	6.57_293.1131m/z	293.113	6.56978	Tyrosyl-Hydroxyproline	C14H18N2O5	50.6	-4.09746	7.38_295.1278m/z	295.128	7.38367	Tyrosyl-Hydroxyproline	C14H18N2O5	50.2	-3.50651	8.17_293.1128m/z	293.113	8.17055	Tyrosyl-Hydroxyproline	C14H18N2O5	55.5	-4.93544
HMDB0029050	4	6.65_292.1282m/z	292.128	6.7	Seryltryptophan	C14H17N3O4	50.3	-3.5	5.41_290.1127m/z	290.113	5.40852	Seryltryptophan	C14H17N3O4	50.8	-6.58653	3.71_292.1280m/z	292.128	3.70857	Seryltryptophan	C14H17N3O4	50.4	-4.10711	4.10_290.1136m/z	290.114	4.10047	Seryltryptophan	C14H17N3O4	53.2	-3.68787
HMDB0028912	4	5.90_260.1956m/z	260.196	5.9	Isoleucyl-Lysine	C12H25N3O3	47	-4.9	1.59_258.1817m/z	258.182	1.58842	Isoleucyl-Lysine	C12H25N3O3	47.7	-2.36115	7.05_260.1965m/z	260.197	7.04953	Isoleucyl-Lysine	C12H25N3O3	53.3	-1.26601	7.44_258.1822m/z	258.182	7.43943	Isoleucyl-Lysine	C12H25N3O3	55.1	-0.502895
HMDB0028910	4	6.65_245.1851m/z	245.185	6.7	Isoleucyl-Isoleucine	C12H24N2O3	48.9	-3.5	5.65_243.1709m/z	243.171	5.6535	Isoleucyl-Isoleucine	C12H24N2O3	48	-2.19374	1.69_245.1848m/z	245.185	1.68685	Isoleucyl-Isoleucine	C12H24N2O3	51.2	-4.85801	1.78_243.1708m/z	243.171	1.77812	Isoleucyl-Isoleucine	C12H24N2O3	53.4	-2.52226
HMDB0028901	4	2.67_288.2021m/z	288.202	2.7	Isoleucyl-Arginine	C12H25N5O3	47.2	-3.3	1.59_286.1875m/z	286.188	1.58842	Isoleucyl-Arginine	C12H25N5O3	56.8	-3.3031	7.02_288.2017m/z	288.202	7.01587	Isoleucyl-Arginine	C12H25N5O3	55.7	-4.47609	6.96_286.1875m/z	286.188	6.96078	Isoleucyl-Arginine	C12H25N5O3	53.3	-3.34723
HMDB0015186	4	9.50_335.1057m/z	335.106	9.5	Penicillin G	C16H18N2O4S	50.8	-1	6.60_333.0908m/z	333.091	6.59995	Penicillin G	C16H18N2O4S	48.3	-2.05345	1.20_335.1045m/z	335.104	1.20238	Penicillin G	C16H18N2O4S	50.7	-4.54447	4.35_333.0900m/z	333.09	4.34628	Penicillin G	C16H18N2O4S	47.2	-4.27558
HMDB0013220	4	4.84_322.0763m/z	322.076	4.8	Beta-Citryl-L-glutamic acid	C11H15NO10	47.7	-1.8	0.75_320.0618m/z	320.062	0.746467	Beta-Citryl-L-glutamic acid	C11H15NO10	45.9	-1.7052	13.39_322.0767m/z	322.077	13.3853	Beta-Citryl-L-glutamic acid	C11H15NO10	47.8	-0.469214	13.58_320.0623m/z	320.062	13.5764	Beta-Citryl-L-glutamic acid	C11H15NO10	47.4	-0.154534
HMDB0011671	4	4.17_622.0327m/z	622.033	4.2	ADP-ribose 1"-2" cyclic phosphate	C15H22N5O16P3	45.6	-3.3	4.98_620.0199m/z	620.02	4.98038	ADP-ribose 1"-2" cyclic phosphate	C15H22N5O16P3	50.4	-0.472994	13.54_622.0320m/z	622.032	13.5388	ADP-ribose 1"-2" cyclic phosphate	C15H22N5O16P3	43.6	-4.32316	13.75_620.0190m/z	620.019	13.7502	ADP-ribose 1"-2" cyclic phosphate	C15H22N5O16P3	52.8	-1.81767
HMDB0011505	4	11.85_480.3064m/z	480.306	11.8	LysoPE(18:1(11Z)/0:0)	C23H46NO7P	40.1	-4.3	12.34_478.2936m/z	478.294	12.3441	LysoPE(18:1(11Z)/0:0)	C23H46NO7P	48.7	-0.723767	1.34_480.3071m/z	480.307	1.33738	LysoPE(18:1(11Z)/0:0)	C23H46NO7P	50.7	-2.80086	0.92_478.2927m/z	478.293	0.9185	LysoPE(18:1(11Z)/0:0)	C23H46NO7P	51.3	-2.46919
HMDB0011493	4	13.31_530.3220m/z	530.322	13.3	LysoPE(0:0/22:4(7Z,10Z,13Z,16Z))	C27H48NO7P	44.6	-4	12.51_528.3084m/z	528.308	12.5068	LysoPE(0:0/22:4(7Z,10Z,13Z,16Z))	C27H48NO7P	42.7	-2.11672	8.91_530.3275m/z	530.327	8.91292	LysoPE(0:0/22:4(7Z,10Z,13Z,16Z))	C27H48NO7P	44.7	6.31804	1.35_528.3078m/z	528.308	1.3508	LysoPE(0:0/22:4(7Z,10Z,13Z,16Z))	C27H48NO7P	40.8	-3.27989
HMDB0011354	4	18.85_722.5100m/z	722.51	18.9	PE(P-16:0/20:5(5Z,8Z,11Z,14Z,17Z))	C41H72NO7P	40.7	-2.7	16.35_720.4950m/z	720.495	16.3548	PE(P-16:0/20:5(5Z,8Z,11Z,14Z,17Z))	C41H72NO7P	46.3	-3.23329	16.97_722.5092m/z	722.509	16.9746	PE(P-16:0/20:5(5Z,8Z,11Z,14Z,17Z))	C41H72NO7P	41.3	-3.80164	3.97_720.4959m/z	720.496	3.96632	PE(P-16:0/20:5(5Z,8Z,11Z,14Z,17Z))	C41H72NO7P	55.8	-2.02832
HMDB0011174	4	6.36_229.1537m/z	229.154	6.4	Isoleucylproline	C11H20N2O3	45.2	-4.4	5.54_227.1397m/z	227.14	5.54402	Isoleucylproline	C11H20N2O3	44.6	-2.03556	3.47_229.1534m/z	229.153	3.47242	Isoleucylproline	C11H20N2O3	53.3	-5.7231	4.42_227.1396m/z	227.14	4.42295	Isoleucylproline	C11H20N2O3	56.9	-2.20642
HMDB0011172	4	5.98_247.1281m/z	247.128	6	gamma-Glutamylvaline	C10H18N2O5	47.4	-3	2.36_245.1138m/z	245.114	2.36203	gamma-Glutamylvaline	C10H18N2O5	47.9	-2.00607	8.58_247.1277m/z	247.128	8.57843	gamma-Glutamylvaline	C10H18N2O5	53.1	-4.58473	8.93_245.1136m/z	245.114	8.92617	gamma-Glutamylvaline	C10H18N2O5	58	-2.92539
HMDB0011170	4	6.26_261.1434m/z	261.143	6.3	gamma-Glutamylisoleucine	C11H20N2O5	47.2	-4.1	2.50_259.1292m/z	259.129	2.4962	gamma-Glutamylisoleucine	C11H20N2O5	56.1	-2.69225	7.60_261.1436m/z	261.144	7.59867	gamma-Glutamylisoleucine	C11H20N2O5	55.2	-3.46499	9.10_259.1290m/z	259.129	9.09815	gamma-Glutamylisoleucine	C11H20N2O5	53.1	-3.6353
HMDB0011152	4	13.42_438.2971m/z	438.297	13.4	PE(P-16:0e/0:0)	C21H44NO6P	44.5	-1.7	12.37_436.2827m/z	436.283	12.3733	PE(P-16:0e/0:0)	C21H44NO6P	51.1	-1.49076	1.26_438.2961m/z	438.296	1.26188	PE(P-16:0e/0:0)	C21H44NO6P	45.9	-4.05294	0.92_436.2820m/z	436.282	0.9185	PE(P-16:0e/0:0)	C21H44NO6P	47.9	-3.00974
HMDB0011129	4	14.19_482.3238m/z	482.324	14.2	LysoPE(0:0/18:0)	C23H48NO7P	43.9	-0.6	13.29_480.3093m/z	480.309	13.2854	LysoPE(0:0/18:0)	C23H48NO7P	46.8	-0.475101	1.38_482.3248m/z	482.325	1.38338	LysoPE(0:0/18:0)	C23H48NO7P	55.6	1.48855	0.92_480.3080m/z	480.308	0.9185	LysoPE(0:0/18:0)	C23H48NO7P	56.6	-3.26083
HMDB0003357	4	1.84_175.1076m/z	175.108	1.8	N-Acetylornithine	C7H14N2O3	44.2	-0.4	1.40_173.0931m/z	173.093	1.40177	N-Acetylornithine	C7H14N2O3	51.8	-0.59382	6.88_175.1067m/z	175.107	6.88137	N-Acetylornithine	C7H14N2O3	49.5	-5.85666	7.26_173.0928m/z	173.093	7.26393	N-Acetylornithine	C7H14N2O3	48	-1.87831
HMDB0003337	4	5.66_613.1587m/z	613.159	5.7	Oxidized glutathione	C20H32N6O12S2	49.9	-0.8	2.02_611.1461m/z	611.146	2.02373	Oxidized glutathione	C20H32N6O12S2	54	2.25635	13.88_613.1595m/z	613.159	13.8799	Oxidized glutathione	C20H32N6O12S2	50.4	0.415599	14.02_611.1463m/z	611.146	14.0232	Oxidized glutathione	C20H32N6O12S2	44.5	2.6566
HMDB0002334	4	13.13_167.0326m/z	167.033	13.1	Benzoquinoneacetic acid	C8H6O4	51.9	-7.9	7.49_165.0190m/z	165.019	7.48672	Benzoquinoneacetic acid	C8H6O4	41.2	-1.7064	0.73_167.0330m/z	167.033	0.734917	Benzoquinoneacetic acid	C8H6O4	51.9	-5.23621	15.00_165.0191m/z	165.019	14.9985	Benzoquinoneacetic acid	C8H6O4	52.1	-1.68425
HMDB0001901	4	4.57_132.1015m/z	132.101	4.6	Aminocaproic acid	C6H13NO2	47.9	-3.1	1.79_130.0875m/z	130.088	1.79408	Aminocaproic acid	C6H13NO2	40.2	1.23547	3.43_132.1015m/z	132.102	3.42742	Aminocaproic acid	C6H13NO2	50.6	-3.07851	7.33_130.0866m/z	130.087	7.32743	Aminocaproic acid	C6H13NO2	46.8	-5.89387
HMDB0001508	4	3.70_412.0402m/z	412.04	3.7	dADP	C10H15N5O9P2	46.7	-3.9	0.99_410.0254m/z	410.025	0.994133	dADP	C10H15N5O9P2	55.4	-4.40517	11.97_412.0400m/z	412.04	11.9714	dADP	C10H15N5O9P2	42.5	-4.43163	12.09_410.0256m/z	410.026	12.0858	dADP	C10H15N5O9P2	54.6	-3.83019
HMDB0001487	4	5.69_666.1305m/z	666.13	5.7	NADH	C21H29N7O14P2	50	-2.4	6.76_664.1175m/z	664.117	6.7636	NADH	C21H29N7O14P2	51	-0.0213754	9.98_666.1316m/z	666.132	9.98418	NADH	C21H29N7O14P2	51.1	-0.641981	10.28_664.1184m/z	664.118	10.2849	NADH	C21H29N7O14P2	46.5	1.33582
HMDB0001397	4	2.29_364.0642m/z	364.064	2.3	Guanosine monophosphate	C10H14N5O8P	49.1	-2.9	1.95_362.0492m/z	362.049	1.94773	Guanosine monophosphate	C10H14N5O8P	56.1	-4.21767	11.00_364.0642m/z	364.064	11.0003	Guanosine monophosphate	C10H14N5O8P	50.9	-3.07323	11.30_362.0495m/z	362.049	11.3034	Guanosine monophosphate	C10H14N5O8P	46.8	-3.38837
HMDB0001373	4	5.95_688.1542m/z	688.154	5.9	Dephospho-CoA	C21H35N7O13P2S	41.8	-2.8	7.03_686.1412m/z	686.141	7.03275	Dephospho-CoA	C21H35N7O13P2S	40.6	-0.551365	7.96_688.1548m/z	688.155	7.96447	Dephospho-CoA	C21H35N7O13P2S	45.4	-1.98281	8.30_686.1410m/z	686.141	8.30087	Dephospho-CoA	C21H35N7O13P2S	52.6	-0.807819
HMDB0001341	4	1.87_428.0356m/z	428.036	1.9	ADP	C10H15N5O10P2	51.1	-2.5	4.95_426.0211m/z	426.021	4.95105	ADP	C10H15N5O10P2	53.1	-2.39309	10.77_428.0349m/z	428.035	10.7711	ADP	C10H15N5O10P2	54.1	-4.21636	12.50_426.0214m/z	426.021	12.4985	ADP	C10H15N5O10P2	53.6	-1.78831
HMDB0001273	4	5.63_523.9971m/z	523.997	5.6	Guanosine triphosphate	C10H16N5O14P3	46.5	-1.7	3.54_521.9892m/z	521.989	3.53997	Guanosine triphosphate	C10H16N5O14P3	43.7	11.1362	14.39_523.9968m/z	523.997	14.3919	Guanosine triphosphate	C10H16N5O14P3	47.2	-2.2576	14.46_521.9820m/z	521.982	14.4565	Guanosine triphosphate	C10H16N5O14P3	53.3	-2.68623
HMDB0001248	4	6.31_786.1629m/z	786.163	6.3	FAD	C27H33N9O15P2	44.4	-2	11.54_784.1499m/z	784.15	11.5386	FAD	C27H33N9O15P2	43.8	0.000984694	9.87_786.1633m/z	786.163	9.87435	FAD	C27H33N9O15P2	45.9	-1.36782	10.17_784.1502m/z	784.15	10.1676	FAD	C27H33N9O15P2	44	0.387929
HMDB0001201	4	2.10_444.0297m/z	444.03	2.1	Guanosine diphosphate	C10H15N5O11P2	40	-4.3	0.86_442.0158m/z	442.016	0.8568	Guanosine diphosphate	C10H15N5O11P2	47	-2.91287	13.81_444.0300m/z	444.03	13.8054	Guanosine diphosphate	C10H15N5O11P2	47.8	-3.70972	14.46_442.0153m/z	442.015	14.4565	Guanosine diphosphate	C10H15N5O11P2	51.8	-4.0651
HMDB0001178	4	5.27_560.0767m/z	560.077	5.3	Adenosine diphosphate ribose	C15H23N5O14P2	56.1	-4	0.96_558.0636m/z	558.064	0.962133	Adenosine diphosphate ribose	C15H23N5O14P2	46.9	-1.46074	10.80_560.0770m/z	560.077	10.8005	Adenosine diphosphate ribose	C15H23N5O14P2	50.7	-3.51403	11.06_558.0634m/z	558.063	11.0624	Adenosine diphosphate ribose	C15H23N5O14P2	53.3	-1.80381
HMDB0001067	4	4.97_305.0968m/z	305.097	5	N-Acetylaspartylglutamic acid	C11H16N2O8	46.9	-3.7	5.13_303.0824m/z	303.082	5.12853	N-Acetylaspartylglutamic acid	C11H16N2O8	49.5	-3.13266	11.80_305.0967m/z	305.097	11.7967	N-Acetylaspartylglutamic acid	C11H16N2O8	48.2	-3.97934	12.04_303.0833m/z	303.083	12.0423	N-Acetylaspartylglutamic acid	C11H16N2O8	53.8	-0.434011
HMDB0000939	4	5.52_385.1276m/z	385.128	5.5	S-Adenosylhomocysteine	C14H20N6O5S	47.8	-3.2	5.23_383.1139m/z	383.114	5.22803	S-Adenosylhomocysteine	C14H20N6O5S	50.3	-1.09197	8.06_385.1278m/z	385.128	8.0593	S-Adenosylhomocysteine	C14H20N6O5S	50.9	-2.8581	11.98_383.1116m/z	383.112	11.9828	S-Adenosylhomocysteine	C14H20N6O5S	54.1	-6.96984
HMDB0000912	4	6.05_384.1137m/z	384.114	6	Succinyladenosine	C14H17N5O8	48.5	-3.3	2.36_382.0992m/z	382.099	2.36203	Succinyladenosine	C14H17N5O8	42.8	-3.17963	9.95_384.1147m/z	384.115	9.95368	Succinyladenosine	C14H17N5O8	52.8	-0.876503	10.26_382.0991m/z	382.099	10.2556	Succinyladenosine	C14H17N5O8	44.7	-3.37291
HMDB0000884	4	3.37_259.0916m/z	259.092	3.4	Ribothymidine	C10H14N2O6	52.8	-3.2	0.84_257.0753m/z	257.075	0.840467	Ribothymidine	C10H14N2O6	41.1	-9.9887	12.32_259.0914m/z	259.091	12.3205	Ribothymidine	C10H14N2O6	47.2	-4.16184	10.02_257.0772m/z	257.077	10.0178	Ribothymidine	C10H14N2O6	56	-2.8153
HMDB0000538	4	1.40_508.0016m/z	508.002	1.4	Adenosine triphosphate	C10H16N5O13P3	52.8	-2.8	5.06_505.9877m/z	505.988	5.0627	Adenosine triphosphate	C10H16N5O13P3	50.2	-1.58757	13.79_508.0024m/z	508.002	13.7906	Adenosine triphosphate	C10H16N5O13P3	53.5	-1.16617	13.95_505.9880m/z	505.988	13.9489	Adenosine triphosphate	C10H16N5O13P3	53.3	-0.837629
HMDB0000472	4	3.95_221.0912m/z	221.091	3.9	5-Hydroxy-L-tryptophan	C11H12N2O3	50.7	-4.1	5.54_219.0771m/z	219.077	5.54402	5-Hydroxy-L-tryptophan	C11H12N2O3	50.5	-1.6631	3.75_221.0915m/z	221.091	3.75357	5-Hydroxy-L-tryptophan	C11H12N2O3	52.3	-2.66027	3.11_219.0772m/z	219.077	3.11268	5-Hydroxy-L-tryptophan	C11H12N2O3	57	-1.34079
HMDB0000321	4	1.29_163.0591m/z	163.059	1.3	2-Hydroxyadipic acid	C6H10O5	45.3	-6.3	0.89_161.0454m/z	161.045	0.8873	2-Hydroxyadipic acid	C6H10O5	57.6	-1.12135	3.56_163.0587m/z	163.059	3.56158	2-Hydroxyadipic acid	C6H10O5	47.5	-8.69219	6.66_161.0452m/z	161.045	6.65963	2-Hydroxyadipic acid	C6H10O5	56.3	-2.3127
HMDB0000295	4	1.31_405.0079m/z	405.008	1.3	Uridine 5'-diphosphate	C9H14N2O12P2	48.8	-3.9	0.75_402.9949m/z	402.995	0.746467	Uridine 5'-diphosphate	C9H14N2O12P2	47.3	-0.140564	13.26_405.0094m/z	405.009	13.2618	Uridine 5'-diphosphate	C9H14N2O12P2	44.1	-0.230331	11.87_402.9933m/z	402.993	11.8657	Uridine 5'-diphosphate	C9H14N2O12P2	55.9	-3.89569
HMDB0000267	4	1.23_130.0493m/z	130.049	1.2	Pyroglutamic acid	C5H7NO3	48	-4.1	0.90_128.0353m/z	128.035	0.902467	Pyroglutamic acid	C5H7NO3	40.2	0.234686	4.13_130.0487m/z	130.049	4.12822	Pyroglutamic acid	C5H7NO3	56	-8.88528	9.61_128.0354m/z	128.035	9.60778	Pyroglutamic acid	C5H7NO3	46.1	0.48888
HMDB0000244	4	8.90_377.1458m/z	377.146	8.9	Riboflavin	C17H20N4O6	42	0.7	6.21_375.1304m/z	375.13	6.21147	Riboflavin	C17H20N4O6	49	-1.52874	2.06_377.1443m/z	377.144	2.0595	Riboflavin	C17H20N4O6	48.6	-3.27402	2.25_375.1294m/z	375.129	2.25292	Riboflavin	C17H20N4O6	44.9	-4.14478
HMDB0000210	4	6.17_220.1183m/z	220.118	6.2	Pantothenic acid	C9H17NO5	54.1	1.5	2.47_218.1036m/z	218.104	2.46587	Pantothenic acid	C9H17NO5	52.2	1.09568	3.49_220.1182m/z	220.118	3.48725	Pantothenic acid	C9H17NO5	55.2	1.15671	14.23_218.1031m/z	218.103	14.232	Pantothenic acid	C9H17NO5	58.8	-1.37373
HMDB0000206	4	1.79_189.1223m/z	189.122	1.8	N6-Acetyl-L-lysine	C8H16N2O3	46.4	-5.7	3.95_187.1084m/z	187.108	3.95212	N6-Acetyl-L-lysine	C8H16N2O3	58.1	-1.99556	7.77_189.1220m/z	189.122	7.77132	N6-Acetyl-L-lysine	C8H16N2O3	43.2	-7.26886	6.84_187.1083m/z	187.108	6.84163	N6-Acetyl-L-lysine	C8H16N2O3	55.3	-2.68164
HMDB0000197	4	9.50_176.0701m/z	176.07	9.5	Indoleacetic acid	C10H9NO2	41.9	-3	7.14_174.0556m/z	174.056	7.13875	Indoleacetic acid	C10H9NO2	49.7	-2.38225	1.28_176.0695m/z	176.069	1.27705	Indoleacetic acid	C10H9NO2	46	-6.56713	0.87_174.0556m/z	174.056	0.869667	Indoleacetic acid	C10H9NO2	56.1	-2.83661
HMDB0000195	4	5.78_269.0877m/z	269.088	5.8	Inosine	C10H12N4O5	51.6	-1.3	4.92_267.0732m/z	267.073	4.92222	Inosine	C10H12N4O5	47.8	-1.10194	2.42_269.0868m/z	269.087	2.41532	Inosine	C10H12N4O5	48.3	-4.77259	2.66_267.0737m/z	267.074	2.66105	Inosine	C10H12N4O5	53.2	0.615901
HMDB0000159	4	6.08_166.0861m/z	166.086	6.1	L-Phenylalanine	C9H11NO2	47.2	-0.9	3.03_164.0721m/z	164.072	3.02567	L-Phenylalanine	C9H11NO2	53.7	2.25149	2.96_166.0860m/z	166.086	2.96045	L-Phenylalanine	C9H11NO2	52.6	-1.30335	5.32_164.0711m/z	164.071	5.32188	L-Phenylalanine	C9H11NO2	57	-3.72797
HMDB0000158	4	5.03_182.0808m/z	182.081	5	L-Tyrosine	C9H11NO3	53.2	-1.8	1.68_180.0669m/z	180.067	1.68475	L-Tyrosine	C9H11NO3	55.2	1.71951	4.68_182.0808m/z	182.081	4.67833	L-Tyrosine	C9H11NO3	53.9	-2.01154	5.13_180.0666m/z	180.067	5.13207	L-Tyrosine	C9H11NO3	56.6	0.0596054
HMDB0000157	4	1.43_137.0446m/z	137.045	1.4	Hypoxanthine	C5H4N4O	54.3	-8.8	2.44_135.0314m/z	135.031	2.43653	Hypoxanthine	C5H4N4O	49.1	0.880234	10.32_137.0447m/z	137.045	10.3156	Hypoxanthine	C5H4N4O	43.4	-7.74645	1.93_135.0318m/z	135.032	1.92943	Hypoxanthine	C5H4N4O	48	4.49149
HMDB0000148	4	1.28_148.0599m/z	148.06	1.3	L-Glutamic acid	C5H9NO4	50.2	-3.6	0.77_146.0459m/z	146.046	0.767633	L-Glutamic acid	C5H9NO4	55.8	0.40978	12.29_148.0593m/z	148.059	12.289	L-Glutamic acid	C5H9NO4	54.7	-7.73676	12.04_146.0450m/z	146.045	12.0423	L-Glutamic acid	C5H9NO4	56.5	-5.92263
HMDB0000133	4	5.78_284.0983m/z	284.098	5.8	Guanosine	C10H13N5O5	53.1	-2.2	4.89_282.0842m/z	282.084	4.89355	Guanosine	C10H13N5O5	48.5	-0.576485	3.38_284.0981m/z	284.098	3.38142	Guanosine	C10H13N5O5	54.8	-2.93966	3.67_282.0841m/z	282.084	3.67182	Guanosine	C10H13N5O5	50.4	-0.906199
HMDB0000125	4	2.13_308.0912m/z	308.091	2.1	Glutathione	C10H17N3O6S	53.2	0.4	0.92_306.0761m/z	306.076	0.917467	Glutathione	C10H17N3O6S	49.9	-1.4406	10.97_308.0900m/z	308.09	10.968	Glutathione	C10H17N3O6S	55.4	-3.50849	11.03_306.0753m/z	306.075	11.0314	Glutathione	C10H17N3O6S	54.6	-4.05244
HMDB0000121	4	6.36_442.1462m/z	442.146	6.4	Folic acid	C19H19N7O6	52.3	-1.6	5.77_440.1316m/z	440.132	5.76733	Folic acid	C19H19N7O6	46.1	-1.79088	10.62_442.1459m/z	442.146	10.6213	Folic acid	C19H19N7O6	53.7	-2.46164	10.92_440.1317m/z	440.132	10.921	Folic acid	C19H19N7O6	50.7	-1.57662
HMDB0000034	4	2.12_136.0608m/z	136.061	2.1	Adenine	C5H5N5	48.1	-7	0.98_134.0469m/z	134.047	0.977467	Adenine	C5H5N5	51.3	-2.31821	13.79_136.0606m/z	136.061	13.7906	Adenine	C5H5N5	42.6	-8.70048	14.13_134.0467m/z	134.047	14.1253	Adenine	C5H5N5	55.8	-3.84197
64742	4	8.29_243.0870m/z	243.087	8.3	Lumichrome	C12H10N4O2	55.5	-2.7	7.47_241.0732m/z	241.073	7.46923	Lumichrome	C12H10N4O2	55.1	0.232025	1.15_243.0866m/z	243.087	1.15355	Lumichrome	C12H10N4O2	53.4	-4.53005	0.98_241.0724m/z	241.072	0.97965	Lumichrome	C12H10N4O2	52.8	-2.93696
102	4	1.43_744.0808m/z	744.081	1.4	Nicotinamide Adenine Dinucleotide Phosphate (NADP+)	C21H28N7O17P3	56.3	-2.6	5.00_742.0689m/z	742.069	4.99688	Nicotinamide Adenine Dinucleotide Phosphate (NADP+)	C21H28N7O17P3	56.9	0.982948	13.54_744.0816m/z	744.082	13.5388	Nicotinamide Adenine Dinucleotide Phosphate (NADP+)	C21H28N7O17P3	57.7	-1.4681	13.75_742.0681m/z	742.068	13.7502	Nicotinamide Adenine Dinucleotide Phosphate (NADP+)	C21H28N7O17P3	58	-0.108587
HMDB0240253	3								0.96_166.0176m/z	166.018	0.962133	N-Acetyltaurine	C4H9NO4S	47.2	-1.84798	7.71_168.0313m/z	168.031	7.71082	N-Acetyltaurine	C4H9NO4S	41.4	-7.28029	2.68_166.0176m/z	166.018	2.67588	N-Acetyltaurine	C4H9NO4S	54.3	-2.15701
HMDB0135801	3								3.40_538.1495m/z	538.149	3.40148	2-amino-4-({1-[(carboxymethyl)-C-hydroxycarbonimidoyl]-2-{[2-hydroxy-2-methoxy-1-(7-methyl-2-oxo-2H-chromen-6-yl)ethyl]sulfanyl}ethyl}-C-hydroxycarbonimidoyl)butanoic acid	C23H29N3O10S	42.1	-1.14961	11.26_540.1671m/z	540.167	11.2593	2-amino-4-({1-[(carboxymethyl)-C-hydroxycarbonimidoyl]-2-{[2-hydroxy-2-methoxy-1-(7-methyl-2-oxo-2H-chromen-6-yl)ethyl]sulfanyl}ethyl}-C-hydroxycarbonimidoyl)butanoic acid	C23H29N3O10S	44.1	4.61299	14.22_538.1510m/z	538.151	14.2162	2-amino-4-({1-[(carboxymethyl)-C-hydroxycarbonimidoyl]-2-{[2-hydroxy-2-methoxy-1-(7-methyl-2-oxo-2H-chromen-6-yl)ethyl]sulfanyl}ethyl}-C-hydroxycarbonimidoyl)butanoic acid	C23H29N3O10S	51.5	1.6632
HMDB0094713	3	3.26_203.1380m/z	203.138	3.3	N-Acetylisoputreanine	C9H18N2O3	46.2	-5								6.13_203.1383m/z	203.138	6.12808	N-Acetylisoputreanine	C9H18N2O3	55.5	-3.54285	4.38_201.1239m/z	201.124	4.37695	N-Acetylisoputreanine	C9H18N2O3	57.1	-2.57149
HMDB0062715	3	1.35_204.0858m/z	204.086	1.4	N-acetyl-L-2-aminoadipate(2-)	C8H13NO5	41.4	-4.2								11.06_204.0862m/z	204.086	11.0618	N-acetyl-L-2-aminoadipate(2-)	C8H13NO5	46.3	-2.07086	11.33_202.0713m/z	202.071	11.332	N-acetyl-L-2-aminoadipate(2-)	C8H13NO5	45.9	-3.94813
HMDB0062181	3	6.92_190.1060m/z	190.106	6.9	N-lactoyl-Valine	C8H15NO4	45.2	-7.5	2.85_188.0925m/z	188.093	2.84835	N-lactoyl-Valine	C8H15NO4	57.5	-1.6596								2.31_188.0923m/z	188.092	2.31423	N-lactoyl-Valine	C8H15NO4	47.6	-2.88614
HMDB0062177	3	6.74_254.1012m/z	254.101	6.7	N-lactoyl-Tyrosine	C12H15NO5	47.2	-4.3	5.64_252.0873m/z	252.087	5.63617	N-lactoyl-Tyrosine	C12H15NO5	46.4	-1.71191								2.68_252.0871m/z	252.087	2.67588	N-lactoyl-Tyrosine	C12H15NO5	48.9	-2.56559
HMDB0062176	3	7.70_204.1220m/z	204.122	7.7	N-lactoyl-Leucine	C9H17NO4	44.8	-5.1	6.80_202.1086m/z	202.109	6.79727	N-lactoyl-Leucine	C9H17NO4	49.5	0.648985								1.73_202.1084m/z	202.108	1.73312	N-lactoyl-Leucine	C9H17NO4	53.5	-0.189077
HMDB0062175	3	7.98_238.1063m/z	238.106	8	N-lactoyl-Phenylalanine	C12H15NO4	46.2	-4.6	7.44_236.0931m/z	236.093	7.43757	N-lactoyl-Phenylalanine	C12H15NO4	49.6	1.08883								1.69_236.0927m/z	236.093	1.68662	N-lactoyl-Phenylalanine	C12H15NO4	57.3	-0.732743
HMDB0061694	3	18.89_524.2964m/z	524.296	18.9	1-Oleoylglycerophosphoserine	C24H46NO9P	46.4	-3.6								2.12_524.2963m/z	524.296	2.12383	1-Oleoylglycerophosphoserine	C24H46NO9P	52.7	-3.85281	2.49_522.2825m/z	522.282	2.4944	1-Oleoylglycerophosphoserine	C24H46NO9P	53.2	-2.44249
HMDB0061693	3	12.15_599.3172m/z	599.317	12.2	1-Oleoylglycerophosphoinositol	C27H51O12P	45.6	-3.1								2.69_599.3231m/z	599.323	2.6873	1-Oleoylglycerophosphoinositol	C27H51O12P	46.9	6.7132	3.05_597.3047m/z	597.305	3.0512	1-Oleoylglycerophosphoinositol	C27H51O12P	46	0.208916
HMDB0061679	3	6.17_184.0960m/z	184.096	6.2	3,4,5,6-Tetrahydrohippuric acid	C9H13NO3	46.6	-4.6	6.97_182.0819m/z	182.082	6.97127	3,4,5,6-Tetrahydrohippuric acid	C9H13NO3	50	-1.88691	3.84_184.0957m/z	184.096	3.84422	3,4,5,6-Tetrahydrohippuric acid	C9H13NO3	54.8	-5.96981
HMDB0059786	3								5.16_874.4187m/z	874.419	5.16153	Gliadorphin	C43H57N9O11	46	9.34728	13.57_876.4303m/z	876.43	13.5713	Gliadorphin	C43H57N9O11	43.9	5.98149	13.77_874.4177m/z	874.418	13.7654	Gliadorphin	C43H57N9O11	49.1	8.23715
HMDB0059614	3	6.31_439.0997m/z	439.1	6.3	Riboflavin cyclic-4',5'-phosphate	C17H19N4O8P	44.7	-3.7	7.35_437.0858m/z	437.086	7.35073	Riboflavin cyclic-4',5'-phosphate	C17H19N4O8P	46.2	-2.16609	9.87_439.0995m/z	439.099	9.87435	Riboflavin cyclic-4',5'-phosphate	C17H19N4O8P	46.7	-4.25634
HMDB0041541	3								0.96_335.1539m/z	335.154	0.962133	N2-Fructopyranosylarginine	C12H24N4O7	50.4	-9.87595	10.46_337.1708m/z	337.171	10.4575	N2-Fructopyranosylarginine	C12H24N4O7	46.6	-2.87228	10.77_335.1552m/z	335.155	10.766	N2-Fructopyranosylarginine	C12H24N4O7	50	-6.15324
HMDB0041222	3	5.91_459.1714m/z	459.171	5.9	a-L-Fucopyranosyl-(1->2)-b-D-galactopyranosyl-(1->2)-D-xylose	C17H30O14	43.4	1.3								9.69_459.1675m/z	459.168	9.69103	a-L-Fucopyranosyl-(1->2)-b-D-galactopyranosyl-(1->2)-D-xylose	C17H30O14	42.7	-7.1666	12.11_457.1567m/z	457.157	12.1145	a-L-Fucopyranosyl-(1->2)-b-D-galactopyranosyl-(1->2)-D-xylose	C17H30O14	43.6	0.847112
HMDB0041208	3								1.68_360.1282m/z	360.128	1.68475	De-O-methylsimmondsin	C15H23NO9	49.3	-5.05865	4.69_362.1429m/z	362.143	4.69383	De-O-methylsimmondsin	C15H23NO9	50.2	-4.48888	5.13_360.1293m/z	360.129	5.13207	De-O-methylsimmondsin	C15H23NO9	52.5	-2.07638
HMDB0039421	3	1.43_664.1160m/z	664.116	1.4	Fenugreekine	C21H27N7O14P2	53.5	-0.6	2.56_662.1022m/z	662.102	2.55537	Fenugreekine	C21H27N7O14P2	51.6	0.567826	10.77_664.1163m/z	664.116	10.7711	Fenugreekine	C21H27N7O14P2	53.5	-0.136674
HMDB0037845	3	5.64_344.1324m/z	344.132	5.6	N-(1-Deoxy-1-fructosyl)tyrosine	C15H21NO8	45.7	-4.7								6.81_344.1321m/z	344.132	6.81305	N-(1-Deoxy-1-fructosyl)tyrosine	C15H21NO8	51.5	-5.47054	7.20_342.1179m/z	342.118	7.20177	N-(1-Deoxy-1-fructosyl)tyrosine	C15H21NO8	46.2	-4.60683
HMDB0037843	3	1.40_282.1173m/z	282.117	1.4	N-(1-Deoxy-1-fructosyl)threonine	C10H19NO8	53.2	-3.9								8.41_282.1180m/z	282.118	8.41362	N-(1-Deoxy-1-fructosyl)threonine	C10H19NO8	53.9	-1.11671	8.77_280.1034m/z	280.103	8.773	N-(1-Deoxy-1-fructosyl)threonine	C10H19NO8	54.3	-1.37803
HMDB0037841	3	3.62_312.1099m/z	312.11	3.6	N-(1-Deoxy-1-fructosyl)methionine	C11H21NO7S	48.5	-3.9	2.35_310.0962m/z	310.096	2.34622	N-(1-Deoxy-1-fructosyl)methionine	C11H21NO7S	47.9	-1.34713	6.28_312.1097m/z	312.11	6.28407	N-(1-Deoxy-1-fructosyl)methionine	C11H21NO7S	52.5	-4.64552
HMDB0034899	3								4.91_433.1929m/z	433.193	4.90788	1,1'-Ethylidenebistryptophan	C24H26N4O4	41.6	10.9895	9.68_435.2071m/z	435.207	9.6762	1,1'-Ethylidenebistryptophan	C24H26N4O4	41.7	10.1397	9.99_433.1928m/z	433.193	9.98777	1,1'-Ethylidenebistryptophan	C24H26N4O4	44	10.7772
HMDB0034879	3								1.22_307.1503m/z	307.15	1.21862	1-[(5-Amino-5-carboxypentyl)amino]-1-deoxyfructose	C12H24N2O7	55.8	-2.49959	12.56_309.1647m/z	309.165	12.563	1-[(5-Amino-5-carboxypentyl)amino]-1-deoxyfructose	C12H24N2O7	51.7	-2.88466	12.88_307.1500m/z	307.15	12.8803	1-[(5-Amino-5-carboxypentyl)amino]-1-deoxyfructose	C12H24N2O7	55.6	-3.53088
HMDB0034688	3	7.78_291.1048m/z	291.105	7.8	2,3-Dihydro-2,3-dihydroxy-9-phenyl-1H-phenalen-1-one	C19H14O3	47.7	11.1	10.07_289.0867m/z	289.087	10.0651	2,3-Dihydro-2,3-dihydroxy-9-phenyl-1H-phenalen-1-one	C19H14O3	52.2	-1.1689								0.79_289.0861m/z	289.086	0.792833	2,3-Dihydro-2,3-dihydroxy-9-phenyl-1H-phenalen-1-one	C19H14O3	55.3	-3.28753
HMDB0034590	3	9.50_419.0568m/z	419.057	9.5	Shoyuflavone C	C19H14O11	42.5	-9.9	6.57_417.0427m/z	417.043	6.56978	Shoyuflavone C	C19H14O11	40.8	-8.68622	5.26_419.0606m/z	419.061	5.26463	Shoyuflavone C	C19H14O11	45.1	-0.581215
HMDB0033613	3	6.12_740.3540m/z	740.354	6.1	Glabrin D	C36H49N7O10	41.3	-10	7.47_738.3472m/z	738.347	7.46923	Glabrin D	C36H49N7O10	45.8	0.481413	10.95_740.3541m/z	740.354	10.9516	Glabrin D	C36H49N7O10	45.7	-9.8159
HMDB0033453	3	3.65_148.0954m/z	148.095	3.7	Fagomine	C6H13NO3	45.2	-9.6								3.47_148.0954m/z	148.095	3.47242	Fagomine	C6H13NO3	53	-9.45107	6.92_146.0818m/z	146.082	6.91595	Fagomine	C6H13NO3	56.5	-2.99751
HMDB0031742	3	5.88_462.1643m/z	462.164	5.9	4-(2-Nitroethyl)phenyl primeveroside	C19H27NO12	41	8								9.84_462.1627m/z	462.163	9.84268	4-(2-Nitroethyl)phenyl primeveroside	C19H27NO12	41.2	4.58675	10.15_460.1499m/z	460.15	10.1527	4-(2-Nitroethyl)phenyl primeveroside	C19H27NO12	52.9	8.30224
HMDB0030643	3								0.84_329.0298m/z	329.03	0.840467	Blighinone	C16H10O8	49.6	-1.56068	11.84_331.0451m/z	331.045	11.8402	Blighinone	C16H10O8	45.7	0.654601	12.10_329.0301m/z	329.03	12.1001	Blighinone	C16H10O8	50.2	-0.642482
HMDB0030419	3	1.82_263.0861m/z	263.086	1.8	gamma-Glutamylaspartic acid	C9H14N2O7	43.5	-4.8								9.65_263.0867m/z	263.087	9.64503	gamma-Glutamylaspartic acid	C9H14N2O7	54.6	-2.44133	12.70_261.0721m/z	261.072	12.7043	gamma-Glutamylaspartic acid	C9H14N2O7	52.2	-2.68512
HMDB0029830	3	10.95_367.1316m/z	367.132	11	N-Caffeoyltryptophan	C20H18N2O5	47.5	7.4	10.10_365.1174m/z	365.117	10.0967	N-Caffeoyltryptophan	C20H18N2O5	44.7	8.34557	0.91_367.1308m/z	367.131	0.907233	N-Caffeoyltryptophan	C20H18N2O5	43.9	5.32192
HMDB0029418	3	1.43_238.0368m/z	238.037	1.4	S-Cysteinosuccinic acid	C7H11NO6S	48.7	-5.1								11.77_238.0367m/z	238.037	11.7677	S-Cysteinosuccinic acid	C7H11NO6S	47.9	-5.48303	12.03_236.0230m/z	236.023	12.0273	S-Cysteinosuccinic acid	C7H11NO6S	54.5	-2.00482
HMDB0029394	3								5.54_392.1125m/z	392.112	5.54402	gamma-L-Glutamyl-S-(2-carboxy-1-propyl)cysteinylglycine	C14H23N3O8S	52.8	-2.17507	7.99_394.1262m/z	394.126	7.99397	gamma-L-Glutamyl-S-(2-carboxy-1-propyl)cysteinylglycine	C14H23N3O8S	46.8	-4.2049	8.35_392.1114m/z	392.111	8.3457	gamma-L-Glutamyl-S-(2-carboxy-1-propyl)cysteinylglycine	C14H23N3O8S	48.5	-4.75579
HMDB0029139	3	6.11_281.1486m/z	281.149	6.1	Valyl-Tyrosine	C14H20N2O4	44.7	-3.6	5.10_279.1345m/z	279.135	5.09703	Valyl-Tyrosine	C14H20N2O4	45.9	-1.75225								2.99_279.1342m/z	279.134	2.98887	Valyl-Tyrosine	C14H20N2O4	42.1	-2.95617
HMDB0029123	3	3.67_233.1120m/z	233.112	3.7	Valyl-Aspartate	C9H16N2O5	41.2	-5								9.66_233.1118m/z	233.112	9.66087	Valyl-Aspartate	C9H16N2O5	56	-5.88736	10.27_231.0980m/z	231.098	10.2703	Valyl-Aspartate	C9H16N2O5	50.4	-2.66874
HMDB0029121	3	5.95_274.1854m/z	274.185	5.9	Valyl-Arginine	C11H23N5O3	41.6	-7.3								7.38_274.1870m/z	274.187	7.38367	Valyl-Arginine	C11H23N5O3	55.2	-1.25429	7.77_272.1718m/z	272.172	7.77073	Valyl-Arginine	C11H23N5O3	55.5	-3.78952
HMDB0029117	3	6.26_345.1432m/z	345.143	6.3	Tyrosyl-Tyrosine	C18H20N2O5	45.7	-3.8								2.69_345.1427m/z	345.143	2.6873	Tyrosyl-Tyrosine	C18H20N2O5	54	-5.22593	2.96_343.1288m/z	343.129	2.9572	Tyrosyl-Tyrosine	C18H20N2O5	41.5	-3.40332
HMDB0029086	3	7.61_318.1803m/z	318.18	7.6	Tryptophyl-Isoleucine	C17H23N3O3	51.6	-2.8	6.12_316.1653m/z	316.165	6.12282	Tryptophyl-Isoleucine	C17H23N3O3	41.2	-4.25081								1.70_316.1652m/z	316.165	1.70212	Tryptophyl-Isoleucine	C17H23N3O3	46.1	-4.49822
HMDB0029068	3	6.44_267.1329m/z	267.133	6.4	Threoninyl-Phenylalanine	C13H18N2O4	47.9	-4	5.24_265.1189m/z	265.119	5.24487	Threoninyl-Phenylalanine	C13H18N2O4	52.5	-1.85239								3.02_265.1184m/z	265.118	3.02003	Threoninyl-Phenylalanine	C13H18N2O4	52.8	-3.84615
HMDB0029055	3	5.48_276.1653m/z	276.165	5.5	Threoninyl-Arginine	C10H21N5O4	42	-4.9								8.90_276.1658m/z	276.166	8.89608	Threoninyl-Arginine	C10H21N5O4	54.2	-3.16342	9.24_274.1511m/z	274.151	9.23665	Threoninyl-Arginine	C10H21N5O4	48.1	-3.47065
HMDB0029028	3	6.87_302.1482m/z	302.148	6.9	Prolyl-Tryptophan	C16H19N3O3	42.4	-5.8	5.67_300.1344m/z	300.134	5.66967	Prolyl-Tryptophan	C16H19N3O3	50.8	-3.17549								4.00_300.1342m/z	300.134	3.99597	Prolyl-Tryptophan	C16H19N3O3	54.1	-3.96401
HMDB0028995	3	6.42_223.1066m/z	223.107	6.4	Phenylalanyl-Glycine	C11H14N2O3	44.5	-4.8	5.29_221.0928m/z	221.093	5.2947	Phenylalanyl-Glycine	C11H14N2O3	41.6	-1.53341	4.13_223.1068m/z	223.107	4.12822	Phenylalanyl-Glycine	C11H14N2O3	46.9	-4.25628
HMDB0028976	3	0.91_263.1454m/z	263.145	0.9	Methionyl-Isoleucine	C11H22N2O3S	40.7	11.5	5.54_261.1265m/z	261.127	5.54402	Methionyl-Isoleucine	C11H22N2O3S	43.3	-4.96735								1.88_261.1276m/z	261.128	1.88293	Methionyl-Isoleucine	C11H22N2O3S	47.8	-0.933996
HMDB0028956	3	1.99_275.2065m/z	275.206	2	Lysyl-Lysine	C12H26N4O3	41.1	-4.7								11.03_275.2066m/z	275.207	11.0325	Lysyl-Lysine	C12H26N4O3	56	-4.25209	13.84_273.1923m/z	273.192	13.8407	Lysyl-Lysine	C12H26N4O3	43.6	-3.35114
HMDB0028835	3	5.90_232.1385m/z	232.138	5.9	Glycyl-Arginine	C8H17N5O3	42	-8.4								10.64_232.1393m/z	232.139	10.6375	Glycyl-Arginine	C8H17N5O3	49.8	-4.7463	10.98_230.1238m/z	230.124	10.9842	Glycyl-Arginine	C8H17N5O3	51.3	-9.0921
HMDB0028742	3	6.67_319.1391m/z	319.139	6.7	Asparaginyl-Tryptophan	C15H18N4O4	50.8	-3.1	5.44_317.1248m/z	317.125	5.44235	Asparaginyl-Tryptophan	C15H18N4O4	51.1	-2.35893								4.50_317.1238m/z	317.124	4.49977	Asparaginyl-Tryptophan	C15H18N4O4	51.2	-5.40203
HMDB0015118	3	13.87_345.1837m/z	345.184	13.9	Formoterol	C19H24N2O4	40.3	8.1	12.54_343.1690m/z	343.169	12.5369	Formoterol	C19H24N2O4	40.1	7.6575								0.75_343.1690m/z	343.169	0.746667	Formoterol	C19H24N2O4	43.2	7.71913
HMDB0015109	3	1.41_293.0979m/z	293.098	1.4	Edetic Acid	C10H16N2O8	48.8	0								11.83_293.0976m/z	293.098	11.8257	Edetic Acid	C10H16N2O8	49.4	-1.02504	10.36_291.0830m/z	291.083	10.3586	Edetic Acid	C10H16N2O8	48.5	-1.21854
HMDB0013311	3	1.46_145.0484m/z	145.048	1.5	trans-2-Hexenedioic acid	C6H8O4	43.8	-7.9								8.27_145.0484m/z	145.048	8.27445	trans-2-Hexenedioic acid	C6H8O4	51.9	-7.61055	4.96_143.0345m/z	143.035	4.95642	trans-2-Hexenedioic acid	C6H8O4	57.6	-3.13213
HMDB0013222	3	1.37_132.0763m/z	132.076	1.4	Beta-Guanidinopropionic acid	C4H9N3O2	46	-3.8	0.95_130.0613m/z	130.061	0.9473	Beta-Guanidinopropionic acid	C4H9N3O2	56.5	-6.74161	6.44_132.0764m/z	132.076	6.4434	Beta-Guanidinopropionic acid	C4H9N3O2	47.2	-2.3927
HMDB0013209	3	6.73_276.1328m/z	276.133	6.7	Alanyltryptophan	C14H17N3O3	48.8	-5.2	5.54_274.1195m/z	274.12	5.54402	Alanyltryptophan	C14H17N3O3	58.5	-0.674675								4.00_274.1189m/z	274.119	3.99597	Alanyltryptophan	C14H17N3O3	42.3	-3.10019
HMDB0011745	3	6.74_192.0679m/z	192.068	6.7	N-Acetyl-L-methionine	C7H13NO3S	49.5	-5.2	2.61_190.0537m/z	190.054	2.61387	N-Acetyl-L-methionine	C7H13NO3S	53.8	-3.248								2.33_190.0537m/z	190.054	2.32975	N-Acetyl-L-methionine	C7H13NO3S	54.1	-3.17899
HMDB0011737	3	1.53_277.1026m/z	277.103	1.5	gamma-Glutamylglutamic acid	C10H16N2O7	49.8	-1.7								12.29_277.1023m/z	277.102	12.289	gamma-Glutamylglutamic acid	C10H16N2O7	51.1	-2.59643	12.54_275.0882m/z	275.088	12.5423	gamma-Glutamylglutamic acid	C10H16N2O7	52.1	-1.16987
HMDB0011507	3	12.49_478.2917m/z	478.292	12.5	LysoPE(18:2(9Z,12Z)/0:0)	C23H44NO7P	44.6	-2.4	11.58_476.2775m/z	476.277	11.5828	LysoPE(18:2(9Z,12Z)/0:0)	C23H44NO7P	46.6	-1.60999	1.35_478.2909m/z	478.291	1.35288	LysoPE(18:2(9Z,12Z)/0:0)	C23H44NO7P	48.6	-3.91285
HMDB0011503	3	12.99_454.2923m/z	454.292	13	LysoPE(16:0/0:0)	C21H44NO7P	48.8	-1.2	12.00_452.2778m/z	452.278	12.0013	LysoPE(16:0/0:0)	C21H44NO7P	48.6	-0.985445	1.37_454.2906m/z	454.291	1.36838	LysoPE(16:0/0:0)	C21H44NO7P	53.4	-4.86485
HMDB0011496	3	11.17_526.2925m/z	526.293	11.2	LysoPE(0:0/22:6(4Z,7Z,10Z,13Z,16Z,19Z))	C27H44NO7P	44.4	-0.6								1.31_526.2907m/z	526.291	1.30705	LysoPE(0:0/22:6(4Z,7Z,10Z,13Z,16Z,19Z))	C27H44NO7P	45.8	-3.9847	1.41_524.2765m/z	524.277	1.4118	LysoPE(0:0/22:6(4Z,7Z,10Z,13Z,16Z,19Z))	C27H44NO7P	50	-3.29977
HMDB0011494	3	18.87_528.3064m/z	528.306	18.9	LysoPE(0:0/22:5(4Z,7Z,10Z,13Z,16Z))	C27H46NO7P	52.3	-4	11.71_526.2933m/z	526.293	11.7138	LysoPE(0:0/22:5(4Z,7Z,10Z,13Z,16Z))	C27H46NO7P	40.1	-1.09879	1.31_528.3064m/z	528.306	1.30705	LysoPE(0:0/22:5(4Z,7Z,10Z,13Z,16Z))	C27H46NO7P	43.8	-3.99254
HMDB0011489	3	18.87_500.2751m/z	500.275	18.9	LysoPE(0:0/20:5(5Z,8Z,11Z,14Z,17Z))	C25H42NO7P	51.8	-4.1								1.34_500.2752m/z	500.275	1.33738	LysoPE(0:0/20:5(5Z,8Z,11Z,14Z,17Z))	C25H42NO7P	53.5	-3.95493	1.46_498.2611m/z	498.261	1.45663	LysoPE(0:0/20:5(5Z,8Z,11Z,14Z,17Z))	C25H42NO7P	52.3	-2.99481
HMDB0011474	3	7.34_452.2765m/z	452.276	7.3	LysoPE(0:0/16:1(9Z))	C21H42NO7P	46.1	-1.5								1.40_452.2754m/z	452.275	1.39922	LysoPE(0:0/16:1(9Z))	C21H42NO7P	49.5	-3.90297	1.53_450.2610m/z	450.261	1.53245	LysoPE(0:0/16:1(9Z))	C21H42NO7P	51	-3.65948
HMDB0011352	3	18.85_724.5255m/z	724.525	18.9	PE(P-16:0/20:4(5Z,8Z,11Z,14Z))	C41H74NO7P	40.5	-2.9	14.56_722.5129m/z	722.513	14.5608	PE(P-16:0/20:4(5Z,8Z,11Z,14Z))	C41H74NO7P	45.1	-0.180376								6.66_722.5122m/z	722.512	6.65963	PE(P-16:0/20:4(5Z,8Z,11Z,14Z))	C41H74NO7P	50.6	-1.10422
HMDB0011173	3								0.95_187.0720m/z	187.072	0.9473	L-glycyl-L-hydroxyproline	C7H12N2O4	52.8	-2.10506	9.25_189.0858m/z	189.086	9.25088	L-glycyl-L-hydroxyproline	C7H12N2O4	46	-6.0516	6.13_187.0722m/z	187.072	6.12583	L-glycyl-L-hydroxyproline	C7H12N2O4	53.5	-1.28111
HMDB0011171	3	6.50_261.1437m/z	261.144	6.5	gamma-Glutamylleucine	C11H20N2O5	50.8	-3	5.28_259.1293m/z	259.129	5.27803	gamma-Glutamylleucine	C11H20N2O5	54.8	-2.62237								8.33_259.1291m/z	259.129	8.33053	gamma-Glutamylleucine	C11H20N2O5	53.4	-3.34282
HMDB0010407	3	13.48_480.3432m/z	480.343	13.5	LysoPC(P-16:0)	C24H50NO6P	40.4	-3.4	12.21_478.3273m/z	478.327	12.2086	LysoPC(P-16:0)	C24H50NO6P	42.5	-6.25592	1.20_480.3428m/z	480.343	1.20238	LysoPC(P-16:0)	C24H50NO6P	40.8	-4.29349
HMDB0010383	3	12.11_494.3234m/z	494.323	12.1	LysoPC(16:1(9Z)/0:0)	C24H48NO7P	42.8	-1.5	11.80_492.3085m/z	492.309	11.8	LysoPC(16:1(9Z)/0:0)	C24H48NO7P	47	-2.08861	1.29_494.3230m/z	494.323	1.29172	LysoPC(16:1(9Z)/0:0)	C24H48NO7P	50.5	-2.23903
HMDB0010379	3	11.74_468.3079m/z	468.308	11.7	LysoPC(14:0/0:0)	C22H46NO7P	50.6	-1.2	11.46_466.2922m/z	466.292	11.4625	LysoPC(14:0/0:0)	C22H46NO7P	46.9	-3.6514	1.34_468.3072m/z	468.307	1.33738	LysoPC(14:0/0:0)	C22H46NO7P	49	-2.69828
HMDB0009050	3								14.22_726.5434m/z	726.543	14.2183	PE(18:1(11Z)/P-18:1(11Z))	C41H78NO7P	56.8	-1.22563	17.18_728.5564m/z	728.556	17.1794	PE(18:1(11Z)/P-18:1(11Z))	C41H78NO7P	42.5	-3.41895	6.70_726.5430m/z	726.543	6.70463	PE(18:1(11Z)/P-18:1(11Z))	C41H78NO7P	51.5	-1.85951
HMDB0006695	3	1.43_229.1171m/z	229.117	1.4	Prolylhydroxyproline	C10H16N2O4	44	-5								1.32_229.1172m/z	229.117	1.32205	Prolylhydroxyproline	C10H16N2O4	52.7	-4.56716	3.36_227.1030m/z	227.103	3.36385	Prolylhydroxyproline	C10H16N2O4	55	-2.99411
HMDB0003764	3	2.17_219.0962m/z	219.096	2.2	Glutamylalanine	C8H14N2O5	47.1	-6.1								10.23_219.0966m/z	219.097	10.234	Glutamylalanine	C8H14N2O5	52.5	-4.2184	11.08_217.0826m/z	217.083	11.077	Glutamylalanine	C8H14N2O5	45	-1.90556
HMDB0003331	3	5.00_282.1185m/z	282.119	5	1-Methyladenosine	C11H15N5O4	41.9	-4								1.48_282.1177m/z	282.118	1.47703	1-Methyladenosine	C11H15N5O4	50.2	-6.96467	10.11_280.1030m/z	280.103	10.1069	1-Methyladenosine	C11H15N5O4	55.5	-7.69232
HMDB0002815	3	13.43_522.3552m/z	522.355	13.4	LysoPC(18:1(9Z))	C26H52NO7P	47.6	-0.5	12.96_520.3397m/z	520.34	12.9567	LysoPC(18:1(9Z))	C26H52NO7P	47.2	-2.18444	2.77_522.3530m/z	522.353	2.76747	LysoPC(18:1(9Z))	C26H52NO7P	54.9	-4.6019
HMDB0001564	3	1.46_447.0651m/z	447.065	1.5	CDP-Ethanolamine	C11H20N4O11P2	45.1	-5.8								11.23_447.0661m/z	447.066	11.2276	CDP-Ethanolamine	C11H20N4O11P2	52	-3.43912	11.52_445.0518m/z	445.052	11.5198	CDP-Ethanolamine	C11H20N4O11P2	52.3	-2.83598
HMDB0001520	3	6.57_457.1105m/z	457.111	6.6	Flavin Mononucleotide	C17H21N4O9P	49	-3	7.17_455.0963m/z	455.096	7.16958	Flavin Mononucleotide	C17H21N4O9P	44.8	-2.17296	9.23_457.1102m/z	457.11	9.23388	Flavin Mononucleotide	C17H21N4O9P	49.4	-3.69891
HMDB0001265	3								0.87_243.0272m/z	243.027	0.872133	Fucose 1-phosphate	C6H13O8P	45.2	-1.46179	9.17_245.0409m/z	245.041	9.16607	Fucose 1-phosphate	C6H13O8P	55.6	-4.87384	9.10_243.0269m/z	243.027	9.09815	Fucose 1-phosphate	C6H13O8P	44.5	-2.66068
HMDB0001200	3								5.54_235.0719m/z	235.072	5.54402	N'-Formylkynurenine	C11H12N2O4	52.8	-2.23285	3.08_237.0855m/z	237.086	3.07912	N'-Formylkynurenine	C11H12N2O4	45.2	-6.27469	3.81_235.0715m/z	235.072	3.80598	N'-Formylkynurenine	C11H12N2O4	51.1	-3.75932
HMDB0001190	3	5.91_160.0746m/z	160.075	5.9	Indoleacetaldehyde	C10H9NO	44.9	-7	6.78_158.0608m/z	158.061	6.7806	Indoleacetaldehyde	C10H9NO	52.3	-2.29261	2.20_160.0746m/z	160.075	2.20317	Indoleacetaldehyde	C10H9NO	48.3	-6.71683
HMDB0001173	3								6.06_296.0821m/z	296.082	6.05798	5'-Methylthioadenosine	C11H15N5O3S	56.4	-0.51624	1.20_298.0960m/z	298.096	1.20238	5'-Methylthioadenosine	C11H15N5O3S	45	-2.84754	1.24_296.0818m/z	296.082	1.24148	5'-Methylthioadenosine	C11H15N5O3S	58.2	-1.52798
HMDB0001155	3	5.60_757.0850m/z	757.085	5.6	Diadenosine triphosphate	C20H27N10O16P3	47.7	-5.6								12.07_757.0865m/z	757.087	12.0747	Diadenosine triphosphate	C20H27N10O16P3	46.4	-3.55862	12.35_755.0737m/z	755.074	12.3498	Diadenosine triphosphate	C20H27N10O16P3	56.6	-1.21889
HMDB0001095	3	4.14_590.0877m/z	590.088	4.1	GDP-L-fucose	C16H25N5O15P2	45.7	-3								11.91_590.0876m/z	590.088	11.9129	GDP-L-fucose	C16H25N5O15P2	50.9	-3.28285	12.19_588.0744m/z	588.074	12.1861	GDP-L-fucose	C16H25N5O15P2	47.9	-0.891158
HMDB0001043	3	15.87_305.2461m/z	305.246	15.9	Arachidonic acid	C20H32O2	42	-4.6	14.74_303.2324m/z	303.232	14.739	Arachidonic acid	C20H32O2	46.3	-1.69442								0.81_303.2325m/z	303.232	0.808667	Arachidonic acid	C20H32O2	48.5	-1.64768
HMDB0000935	3	2.65_581.0403m/z	581.04	2.7	Uridine diphosphate glucuronic acid	C15H22N2O18P2	44.7	-2.2								13.26_581.0410m/z	581.041	13.2618	Uridine diphosphate glucuronic acid	C15H22N2O18P2	56.3	-1.0025	10.57_579.0260m/z	579.026	10.5682	Uridine diphosphate glucuronic acid	C15H22N2O18P2	53.6	-1.68417
HMDB0000905	3	4.96_332.0741m/z	332.074	5	Deoxyadenosine monophosphate	C10H14N5O6P	45.4	-4	5.24_330.0606m/z	330.061	5.24487	Deoxyadenosine monophosphate	C10H14N5O6P	40.3	-0.780816								9.55_330.0595m/z	330.06	9.54697	Deoxyadenosine monophosphate	C10H14N5O6P	48.7	-4.06862
HMDB0000828	3	1.94_177.0498m/z	177.05	1.9	Ureidosuccinic acid	C5H8N2O5	46.7	-4.3								10.41_177.0493m/z	177.049	10.413	Ureidosuccinic acid	C5H8N2O5	51.3	-7.55549	10.71_175.0357m/z	175.036	10.7075	Ureidosuccinic acid	C5H8N2O5	52.8	-1.94216
HMDB0000812	3	2.45_176.0546m/z	176.055	2.4	N-Acetyl-L-aspartic acid	C6H9NO5	50.1	-4.1								9.41_176.0543m/z	176.054	9.40522	N-Acetyl-L-aspartic acid	C6H9NO5	49	-6.04637	9.69_174.0410m/z	174.041	9.69495	N-Acetyl-L-aspartic acid	C6H9NO5	52.6	0.950496
HMDB0000786	3	4.69_153.0400m/z	153.04	4.7	Oxypurinol	C5H4N4O2	49.8	-4.8	2.26_151.0262m/z	151.026	2.25738	Oxypurinol	C5H4N4O2	46.2	0.173613	5.58_153.0395m/z	153.039	5.58045	Oxypurinol	C5H4N4O2	52.7	-8.11952
HMDB0000734	3	6.46_188.0710m/z	188.071	6.5	Indoleacrylic acid	C11H9NO2	49.1	2	5.56_186.0554m/z	186.055	5.55852	Indoleacrylic acid	C11H9NO2	56.8	-3.57517	3.02_188.0704m/z	188.07	3.01912	Indoleacrylic acid	C11H9NO2	49.3	-1.24512
HMDB0000719	3	1.23_120.0643m/z	120.064	1.2	L-Homoserine	C4H9NO3	48.2	-9.9	0.86_118.0508m/z	118.051	0.8568	L-Homoserine	C4H9NO3	54.9	-1.42801	8.41_120.0642m/z	120.064	8.41362	L-Homoserine	C4H9NO3	51.6	-10.8115
HMDB0000714	3	7.24_180.0647m/z	180.065	7.2	Hippuric acid	C9H9NO3	45.3	-4.5	2.58_178.0505m/z	178.051	2.58453	Hippuric acid	C9H9NO3	55.3	-2.38994								1.98_178.0505m/z	178.051	1.97577	Hippuric acid	C9H9NO3	58.4	-2.56015
[truncated: 2,531 more rows]
