# Supplementary material for: Comprehensive Metabolomic Analysis Reveals Dynamic Metabolic Reprogramming in Hep3B Cells with Aflatoxin B1 Exposure
Source: Toxins (Basel). 2021 May 27;13(6):384. doi: 10.3390/toxins13060384 (PMC8229485; doi:10.3390/toxins13060384)
Supplement: Supplementary file 1 [file toxins-13-00384-s001.zip › Table S3.xlsx]

## Sheet: RPLC-POS
Table S3. The key information of 680 differential metabolite features obtained by RPLC-POS analysis mode
Metabolic feature	m/z	RT(min)	Metabolite name	Metabolite ID	Formula	Score	Mass Error(ppm)	VIP	FC(16/DMSO)	FC(32/DMSO)	FC(32/16)
15.30_510.3901m/z	510.39	15.3	2-O-ethylPAFC-16	62939	C26H56NO6P	39.6	-3.31559	2.32799	0.46327	0.335787
13.34_357.2604m/z	357.26	13.34	13,14-dihydro-PGE1	36193	C20H36O5	39.7	-8.86692	2.39046	0.107486	0.0155757	0.151308
12.61_410.3253m/z	410.325	12.61	PGF2adiethylamide	45673	C24H43NO4	39.7	-2.87664	3.93081	69.7314	9.89209	0.250346
6.12_292.1016m/z	292.102	6.12	Toyocamycin	96312	C12H13N5O4	39.8	-8.45113	1.83903	0.607123	1.64342	585.051
14.64_315.2302m/z	315.23	14.64	Methyldehydroabietate	265055	C21H30O2	39.8	-5.28062	1.17737		9.02375	26.0082
12.33_602.3388m/z	602.339	12.33	GluGluValLeuIle	264167	C27H47N5O10	39.8	-1.26432	1.10482	2.10068		0.531548
13.76_581.3643m/z	581.364	13.76	IleHisArgArg	162173	C24H44N12O5	39.9	2.23391	3.59188	96.7519	11.6673	0.328577
5.63_229.1536m/z	229.154	5.63	ProLeu	23647	C11H20N2O3	40.3	-4.88007	1.10238	0.662333	0.423301	0.63909
13.55_572.3699m/z	572.37	13.55	LeuSerProLysLys	264871	C26H49N7O7	40.3	-11.8536	1.41404		8.57048	7.98599
14.84_742.5378m/z	742.538	14.84	PE(16:0/20:3(5Z,8Z,11Z))	HMDB0008935	C41H76NO8P	40.3	-0.4	3.51618		4.37709
13.62_539.2595m/z	539.26	13.62	TyrSerAsnArg	261713	C22H34N8O8	40.4	4.20289	1.21492		1.59501
11.82_376.2595m/z	376.26	11.82	LysThrLys	19689	C16H33N5O5	40.4	10.6771	5.57144		1.78875
13.81_537.3380m/z	537.338	13.81	TyrValLysLys	262447	C26H44N6O6	40.5	-2.85523	3.61809	109.856	12.1464	0.323854
13.81_508.3749m/z	508.375	13.81	LysoPC(P-18:0)	HMDB0013122	C26H54NO6P	40.5	-2.5	5.43131		0.36016	0.439232
11.94_415.2108m/z	415.211	11.94	LysHisMet	17238	C17H30N6O4S	40.6	-3.40957	1.84997		1.67317
6.70_581.3135m/z	581.313	6.7	HordatineB	HMDB0030459	C29H40N8O5	40.6	-10.2	1.01672	0.395209		2.94722
14.84_317.3040m/z	317.304	14.84	1,2,4-Nonadecanetriol	HMDB0032112	C19H40O3	40.7	-3.12554	1.50853	0.0990196	0.0174854	0.218518
3.75_248.1481m/z	248.148	3.75	(R)-3-hydroxybutyrylcarnitine	HMDB0062735	C11H21NO5	40.8	-4.6	2.05421	0.27654	0.110552	0.399683
10.94_414.3049m/z	414.305	10.94	N-DocosahexaenoylGABA	HMDB0062332	C26H39NO3	40.8	11.2	1.26199	0.569645	0.490572
14.65_864.6231m/z	864.623	14.65	3-O-Sulfogalactosylceramide(d18:1/22:0)	HMDB0012316	C46H89NO11S	41	0.2	1.20219		1.53976
11.66_442.3504m/z	442.35	11.66	2-Hydroxy-3-methoxyestrone	HMDB0011195	C25H47NO5	41.1	-5.2	2.08528	0.121445	0.0840063
14.30_854.5787m/z	854.579	14.3	PC(22:6(4Z,7Z,10Z,13Z,16Z,19Z)/20:4(5Z,8Z,11Z,14Z))	HMDB0008739	C50H80NO8P	41.1	10.9	1.90775		2.45222
2.99_379.1273m/z	379.127	2.99	AspAsnMet	19688	C13H22N4O7S	41.2	-2.48307	6.7775	4.13755	3.90528
13.91_572.2942m/z	572.294	13.91	Kinetensin4-7	HMDB0012986	C26H37N9O6	41.3	0.3	1.16067	2.34555	4.76339	2.78165
6.12_740.3540m/z	740.354	6.12	GlabrinD	HMDB0033613	C36H49N7O10	41.3	-10	2.16319	0.535003		25.8786
1.47_684.1392m/z	684.139	1.47	(6S)-6-beta-hydroxy-1,4,5,6-tetrahydronicotinamide-adeninedinucleotide	HMDB0059644	C21H31N7O15P2	41.4	-5	1.81689	3.67821	2.64834
18.85_690.5061m/z	690.506	18.85	PE(16:0/16:1(9Z))	HMDB0008924	C37H72NO8P	41.5	-1.1	1.06306	2.95364	3.29356
5.77_366.1327m/z	366.133	5.77	MetSerGlu	22553	C13H23N3O7S	41.7	-0.7873	1.33985	1.58391	2.177
6.31_173.0798m/z	173.08	6.31	2-Octenedioicacid	HMDB0000341	C8H12O4	41.8	-6.257	1.28384		0.567383	0.556343
15.00_502.3151m/z	502.315	15	ArgAlaGlnLys	215747	C20H39N9O6	41.8	10.9575	2.87284		1.86768
7.43_561.2686m/z	561.269	7.43	TyrHisLeuGlu	258062	C26H36N6O8	41.9	3.2897	1.10866	1.72824	3.06855	1.78633
11.93_542.3231m/z	542.323	11.93	LeuAlaProLeuGlu	265004	C25H43N5O8	41.9	8.51807	5.6542	2.02898	17.0896	10.0315
7.32_648.3783m/z	648.378	7.32	NummularineA	HMDB0029336	C36H49N5O6	41.9	4.3	3.19698	53.4237	2.70777	0.122611
10.53_388.3046m/z	388.305	10.53	3-hydroxytetradecanoylcarnitine	HMDB0061640	C21H41NO5	41.9	-2.9	1.57462	0.12187	0.0186968	0.152866
13.97_353.1952m/z	353.195	13.97	[4]-Gingerdiol3,5-diacetate	HMDB0039132	C19H28O6	41.9	-2	2.07283	2.0883	2.90346
13.15_291.1949m/z	291.195	13.15	EcklonialactoneA	65409	C18H26O3	41.9	-1.88596	1.86706		2.77229	2.05864
13.79_548.3690m/z	548.369	13.79	LysoPC(20:2(11Z,14Z))	HMDB0010392	C28H54NO7P	41.9	-3.8	1.47007		3.80622	7.04732
12.34_542.3205m/z	542.321	12.34	LysoPC(20:5(5Z,8Z,11Z,14Z,17Z))	HMDB0010397	C28H48NO7P	41.9	-6.7	1.30918	5.17192		10.9795
5.69_192.0851m/z	192.085	5.69	CalystegineC1	HMDB0031346	C7H13NO5	42.1	-7.8	1.06073	0.438894	0.0884117	0.203174
11.91_386.3252m/z	386.325	11.91	Pentadecanoylcarnitine	HMDB0062517	C22H43NO4	42.1	-3.4	1.95662	0.194243	0.0895794	0.454342
12.47_526.2975m/z	526.298	12.47	LysoPE(22:6(4Z,7Z,10Z,13Z,16Z,19Z)/0:0)	HMDB0011526	C27H44NO7P	42.2	8.9	3.13137		2.6868	2.34324
7.64_304.2109m/z	304.211	7.64	3-hydroxyoctanoylcarnitine	HMDB0061634	C15H29NO5	42.3	-3.1	1.11586	0.140939	0.0451599	0.319864
15.03_283.1740m/z	283.174	15.03	Hexaethyleneglycol	HMDB0061822	C12H26O7	42.3	-4.2	1.18378		1.65366
12.58_170.0953m/z	170.095	12.58	4-Aminobiphenyl	HMDB0013195	C12H11N	42.4	-6.84622	1.33952		5.49747	3.30584
16.29_848.6284m/z	848.628	16.29	PS(24:0/16:0)	HMDB0112884	C46H90NO10P	42.4	-10.7	2.95737	1.52346
5.60_327.0785m/z	327.079	5.6	Asp-Abu-OH	65298	C13H14N2O8	42.5	-11.6384	1.34109			0.66977
13.39_546.3509m/z	546.351	13.39	LysoPC(20:3(5Z,8Z,11Z))	HMDB0010393	C28H52NO7P	42.6	6.96205	1.2012	1.84508	3.69476	2.18861
6.76_187.0960m/z	187.096	6.76	5-Butyltetrahydro-2-oxo-3-furancarboxylicacid	HMDB0030992	C9H14O4	42.6	-2.5	1.35132		0.479188	0.360589
16.26_716.5512m/z	716.551	16.26	PC(P-18:0/14:1(9Z))	HMDB0011237	C40H78NO7P	42.6	-10.7	8.09549		1.68221
12.11_494.3234m/z	494.323	12.11	LysoPC(16:1(9Z)/0:0)	HMDB0010383	C24H48NO7P	42.8	-1.50828	12.0466		7.18393	3.74888
7.61_540.3299m/z	540.33	7.61	HisLysGlnLys	154947	C23H41N9O6	42.9	8.67716	2.25298	60.2009	2.33517	0.0852441
5.88_262.1638m/z	262.164	5.88	hydroxyisovaleroylcarnitine	HMDB0062555	C12H23NO5	43	-4.2	2.1416	0.533083	0.252255	0.473302
14.54_634.4487m/z	634.449	14.54	PE(14:1(9Z)/14:0)	HMDB0008854	C33H64NO8P	43.2	7	4.90525	2.40793	4.45771	1.61978
1.23_537.1930m/z	537.193	1.23	8-Hydroxypinoresinol4-glucoside	HMDB0033282	C26H32O12	43.2	-6.9	1.26954		0.473433	0.574461
5.28_113.0334m/z	113.033	5.28	Uracil	HMDB0000300	C4H4N2O2	43.3	-10.1713	1.24472	10.1901	6.23072	0.620434
12.11_516.3045m/z	516.304	12.11	LysoPC(18:4(6Z,9Z,12Z,15Z))	HMDB0010389	C26H46NO7P	43.4	3.34921	3.90088		7.97021	4.51038
5.91_459.1714m/z	459.171	5.91	a-L-Fucopyranosyl-(1->2)-b-D-galactopyranosyl-(1->2)-D-xylose	HMDB0041222	C17H30O14	43.4	1.3	1.88521	0.287235		22.0331
8.79_288.2164m/z	288.216	8.79	L-Octanoylcarnitine	HMDB0000791	C15H29NO4	43.5	-2.00565	1.3542	0.396407	0.117232	0.311423
5.93_271.0744m/z	271.074	5.93	3-(Cystein-S-yl)acetaminophen	HMDB0240217	C11H14N2O4S	43.5	-1.3	2.09778	1.78292
13.45_482.3598m/z	482.36	13.45	Lyso-PAFC-16	24070	C24H52NO6P	43.6	-1.49323	8.05229	0.553924	0.194331	0.350949
11.88_518.3223m/z	518.322	11.88	LysoPC(18:3(6Z,9Z,12Z))	HMDB0010387	C26H48NO7P	43.6	-3.6	2.87678	1.74595	11.314	9.88852
12.52_502.2919m/z	502.292	12.52	LysoPE(20:4(8Z,11Z,14Z,17Z)/0:0)	HMDB0011518	C32H39NO4	43.7	-6.50012	5.32024	1.51644	7.01425	4.70715
15.21_317.2461m/z	317.246	15.21	Calusterone	HMDB0004627	C21H32O2	43.8	-4.38954	1.23065	1.93177	28.0354	217.957
13.90_383.2783m/z	383.278	13.9	Misoprostol	HMDB0015064	C22H38O5	43.9	-2.27481	3.63783	37.5924	5.84707	0.358554
11.39_416.3365m/z	416.337	11.39	3-hydroxyhexadecanoylcarnitine	HMDB0061642	C23H45NO5	44.1	-1.4	2.39026	0.0843566	0.0108533	0.120884
12.74_209.1526m/z	209.153	12.74	Eremopetasinorol	HMDB0029668	C13H20O2	44.2	-4.9	1.11067	1.83918	3.3302	1.88649
12.99_504.3075m/z	504.308	12.99	LysoPE(0:0/20:3(11Z,14Z,17Z))	HMDB0011484	C25H46NO7P	44.2	-2	1.09064		4.62741	4.11636
6.31_786.1629m/z	786.163	6.31	FAD	HMDB0001248	C27H33N9O15P2	44.4	-1.96307	1.97377		0.5628	0.61115
2.09_72.0803m/z	72.0803	2.09	Pyrrolidine	HMDB0031641	C4H9N	44.4	-6.6	2.35081	1.60305
12.78_528.3073m/z	528.307	12.78	LysoPE(0:0/22:5(4Z,7Z,10Z,13Z,16Z))	HMDB0011494	C27H46NO7P	44.5	-2.3	2.31555	1.63241	3.87934	2.39645
13.42_438.2971m/z	438.297	13.42	PE(P-16:0e/0:0)	HMDB0011152	C21H44NO6P	44.5	-1.7	4.27947	0.585989	0.530669
13.07_428.3721m/z	428.372	13.07	Stearoylcarnitine	HMDB0000848	C25H49NO4	44.5	-3	4.24285	0.161816	0.213394
12.06_452.2781m/z	452.278	12.06	LysoPE(16:1(9Z)/0:0)	HMDB0011504	C21H42NO7P	44.6	2.04785	2.0144		2.30007	1.96676
12.49_478.2917m/z	478.292	12.49	LysoPE(18:2(9Z,12Z)/0:0)	HMDB0011507	C23H44NO7P	44.6	6.66904	2.26528		4.04976	4.7855
15.64_702.5356m/z	702.536	15.64	PE(16:0/P-18:1(11Z))	HMDB0008951	C39H76NO7P	44.6	-10.8	10.004		1.58467
9.91_297.0754m/z	297.075	9.91	Gyrocyanin	HMDB0034126	C17H12O5	44.8	-1.18462	1.01974	15.0726	5.70686	0.387209
10.89_573.3017m/z	573.302	10.89	1-hexadecanoyl-sn-glycero-3-phospho-D-myo-inositol	HMDB0062714	C25H49O12P	44.9	4.50124	1.11789	1.65303	1.73428
12.50_426.3570m/z	426.357	12.5	Octadecenoylcarnitine	HMDB0094687	C25H47NO4	45	-1.8	9.40083	0.144054	0.0645547	0.451507
6.31_232.1545m/z	232.155	6.31	Isobutyryl-L-carnitine	HMDB0000736	C11H21NO4	45	0.629046	8.57623		0.409977	0.391218
5.78_137.0450m/z	137.045	5.78	Hypoxanthine	HMDB0000157	C5H4N4O	45.1	-5.60476	2.42735		0.209416	0.134675
13.63_235.1679m/z	235.168	13.63	Petasalbin	HMDB0035639	C15H22O2	45.2	-5.90163	2.09295	1.65022	2.27561
5.68_156.1371m/z	156.137	5.68	2,2,6,6-Tetramethyl-4-piperidinone	HMDB0031179	C9H17NO	45.3	-7.4	1.36555	1.88088	2.18249
5.90_350.1009m/z	350.101	5.9	S-(Formylmethyl)glutathione	HMDB0060507	C12H19N3O7S	45.3	-2.2	1.98135	2.73998		0.51486
13.59_752.5159m/z	752.516	13.59	PE(15:0/22:5(4Z,7Z,10Z,13Z,16Z))	HMDB0008911	C42H74NO8P	45.4	-8.7	13.4939	113.057	11.6405	0.265127
14.30_279.1580m/z	279.158	14.3	2-[(3,3-dimethyloxiran-2-yl)methyl]-4-(3-methylbut-2-en-1-yl)benzene-1,3,5-triol	HMDB0133048	C16H22O4	45.5	-3.97588	1.85315		1.86885
5.90_768.1211m/z	768.121	5.9	CoenzymeA	HMDB0001423	C21H36N7O16P3S	45.6	-1.8	1.70867			0.523993
12.15_599.3172m/z	599.317	12.15	1-Oleoylglycerophosphoinositol	HMDB0061693	C27H51O12P	45.6	-3.1	3.43658	1.7244		0.620575
5.64_344.1324m/z	344.132	5.64	N-(1-Deoxy-1-fructosyl)tyrosine	HMDB0037845	C15H21NO8	45.7	-4.7	1.19791		3.7016	1.95659
12.37_482.3232m/z	482.323	12.37	LysoPC(15:0)	HMDB0010381	C23H48NO7P	45.8	-1.9	2.53295		4.80522	3.86923
12.74_508.3385m/z	508.339	12.74	LysoPE(0:0/20:1(11Z))	HMDB0011482	C25H50NO7P	46.1	-2.5	4.17496	1.93914	7.07901	4.48096
12.32_400.3427m/z	400.343	12.32	L-Palmitoylcarnitine	HMDB0000222	C23H45NO4	46.1	1.35341	10.4125	0.262089	0.137519	0.548545
12.52_568.3387m/z	568.339	12.52	LysoPC(22:6(4Z,7Z,10Z,13Z,16Z,19Z))	HMDB0010404	C30H50NO7P	46.1	-1.9	4.55053		4.43845	3.10891
13.62_309.2054m/z	309.205	13.62	(6E,8E,10R,12Z)-10-Hydroxy-3-oxooctadecatrienoicacid	HMDB0062357	C18H28O4	46.2	-2.19548	1.9054		4.51055	2.94637
2.39_179.0477m/z	179.048	2.39	Cysteinylglycine	HMDB0000078	C5H10N2O3S	46.2	-4.70658	6.53256	1.78891
11.96_195.1371m/z	195.137	11.96	Neocnidilide	HMDB0034450	C12H18O2	46.3	-4.21902	1.23632		2.20198	1.52405
5.03_95.0483m/z	95.0483	5.03	Phenol	HMDB0000228	C6H6O	46.3	-8.45686	1.73102	1.59153
13.49_840.5671m/z	840.567	13.49	PS(18:3(6Z,9Z,12Z)/22:1(13Z))	HMDB0112461	C46H82NO10P	46.6	-9.3	7.68553	108.211	10.457	0.25719
14.30_417.3346m/z	417.335	14.3	3beta-Hydroxy-5-cholestenoate	HMDB0012453	C27H44O3	46.6	-4.23544	1.251		0.490681	0.584625
14.85_688.5194m/z	688.519	14.85	PE(15:0/P-18:1(11Z))	HMDB0008918	C38H74NO7P	46.6	-11.9	7.29571		1.58604
6.17_184.0960m/z	184.096	6.17	3,4,5,6-Tetrahydrohippuricacid	HMDB0061679	C9H13NO3	46.6	-4.60767	1.76896	1.59833
13.06_496.3394m/z	496.339	13.06	LysoPC(16:0)	HMDB0010382	C24H50NO7P	46.8	-0.740764	13.7417		2.25842	2.05904
7.63_260.1853m/z	260.185	7.63	L-Hexanoylcarnitine	HMDB0000756	C13H25NO4	46.9	-1.4499	3.0292		0.218808	0.268555
5.60_305.0961m/z	305.096	5.6	N-Acetylaspartylglutamicacid	HMDB0001067	C11H16N2O8	46.9	-5.9	2.50888		0.535012	0.550329
9.74_316.2475m/z	316.248	9.74	Decanoylcarnitine	HMDB0000651	C17H33NO4	47	-2.21727	1.36636	0.353642	0.107434	0.305109
13.87_286.2367m/z	286.237	13.87	Myristoylglycine	HMDB0013250	C16H31NO3	47	-3.5	1.29328		0.191203	0.298947
6.08_166.0861m/z	166.086	6.08	L-Phenylalanine	HMDB0000159	C9H11NO2	47.2	-0.911966	8.54857	1.59496
12.61_269.1739m/z	269.174	12.61	3,11,12-Trihydroxy-1(10)-spirovetiven-2-one	HMDB0038154	C15H24O4	47.3	-3.1829	1.11948	1.82938	2.44878
12.55_520.3388m/z	520.339	12.55	LysoPC(18:2(9Z,12Z))	HMDB0010386	C26H50NO7P	47.4	-1.8	11.0005	1.90681	14.6835	10.7227
12.56_544.3389m/z	544.339	12.56	LysoPC(20:4(8Z,11Z,14Z,17Z))	HMDB0010396	C28H50NO7P	47.4	-1.6	8.46784	1.91723	12.0729	6.89172
13.79_510.3562m/z	510.356	13.79	1-heptadecanoyl-sn-glycero-3-phosphocholine	24068	C25H52NO7P	47.4	1.58101	1.64418	0.542108		2.69927
5.98_247.1281m/z	247.128	5.98	gamma-Glutamylvaline	HMDB0011172	C10H18N2O5	47.4	-2.99661	1.64679	2.40117		0.610927
13.20_522.3548m/z	522.355	13.2	LysoPC(18:1(9Z))	HMDB0002815	C26H52NO7P	47.4	-1.2	6.32635	1.74872
5.82_218.1384m/z	218.138	5.82	Propionylcarnitine	HMDB0000824	C10H19NO4	47.5	-1.20969	6.53875	0.586793	0.131574	0.230643
5.61_560.0769m/z	560.077	5.61	Adenosinediphosphateribose	HMDB0001178	C15H23N5O14P2	47.5	-3.62749	1.17543	0.500553	0.297317	0.58746
1.67_608.0878m/z	608.088	1.67	UDP-N-acetyl-D-mannosamine	HMDB0013112	C17H27N3O17P2	47.5	-1.6	8.30647	0.551148	0.44509
13.43_522.3552m/z	522.355	13.43	LysoPC(18:1(9Z))	HMDB0002815	C26H52NO7P	47.6	-0.5	17.3878		3.73858	2.97413
7.00_407.2643m/z	407.264	7	LysIlePhe	20694	C21H34N4O4	47.7	-2.53448	1.64418		1.63784	1.94054
14.11_259.1895m/z	259.19	14.11	2-Hydroxypropyl2-isopropyl-5-methylcyclohexylcarbonate	HMDB0059946	C14H26O4	47.7	-3.40679	3.20431		5.73286	3.21203
6.74_246.1699m/z	246.17	6.74	Pivaloylcarnitine	HMDB0041993	C12H23NO4	47.8	-0.3649	9.61812		0.430495	0.317411
11.49_372.3112m/z	372.311	11.49	Tetradecanoylcarnitine	HMDB0005066	C21H41NO4	47.9	0.88098	7.36544	0.26263	0.0619964	0.258631
12.85_570.3549m/z	570.355	12.85	LysoPC(22:5(4Z,7Z,10Z,13Z,16Z))	HMDB0010402	C30H52NO7P	47.9	-0.9	4.33663	1.77216	5.58635	3.29098
13.06_518.3193m/z	518.319	13.06	LysoPC(18:3(6Z,9Z,12Z))	HMDB0010387	C26H48NO7P	48	-9.3	3.24668		1.93073	1.55978
14.47_482.3235m/z	482.324	14.47	LysoPE(18:0/0:0)	HMDB0011130	C23H48NO7P	48	-1.2	2.94697		1.61239	2.329
9.71_313.0708m/z	313.071	9.71	AflatoxinB1	HMDB0006552	C17H12O6	48.1	0.330155	5.77061	16974.5	11528.6	0.643176
6.06_149.0588m/z	149.059	6.06	3,4-Dihydro-2H-1-benzopyran-2-one	HMDB0036626	C9H8O2	48.2	-5.98937	1.74322	1.5038
1.23_120.0643m/z	120.064	1.23	L-Homoserine	HMDB0000719	C4H9NO3	48.2	-9.88298	1.48511	1.61178
11.88_500.2762m/z	500.276	11.88	LysoPE(0:0/20:5(5Z,8Z,11Z,14Z,17Z))	HMDB0011489	C25H42NO7P	48.4	-2	3.6361	1.83315	7.6156	4.39836
13.43_544.3357m/z	544.336	13.43	LysoPC(20:4(5Z,8Z,11Z,14Z))	HMDB0010395	C28H50NO7P	48.4	2.95533	4.43133		3.0403	2.40626
7.58_194.0809m/z	194.081	7.58	Phenylacetylglycine	HMDB0000821	C10H11NO3	48.5	-1.23382	2.80216	2.55773	1.6295	0.64188
5.66_260.1593m/z	260.159	5.66	Isoleucyl-Gamma-glutamate	HMDB0028921	C11H21N3O4	48.8	-4.4791	1.20842	1.65151	1.54491
3.55_508.0021m/z	508.002	3.55	Adenosinetriphosphate	HMDB0000538	C10H16N5O13P3	48.8	-1.75127	9.65814	4.2772	3.95653
1.41_293.0979m/z	293.098	1.41	EdeticAcid	HMDB0015109	C10H16N2O8	48.8		10.5565		2.26335	1.91592
2.09_118.0856m/z	118.086	2.09	5-Aminopentanoicacid	HMDB0003355	C5H11NO2	48.8	-5.72787	2.93451	1.58384		0.662154
1.29_162.1119m/z	162.112	1.29	L-Carnitine	HMDB0000062	C7H15NO3	48.9	-3.30412	4.6525		0.495162	0.491705
9.64_287.0909m/z	287.091	9.64	(R)-Pabulenol	HMDB0034438	C16H14O5	49	-1.74491	1.56785	106.724	210.167	12.6209
15.33_119.0845m/z	119.085	15.33	Indane	HMDB0059837	C9H10	49	-8.6	1.82367		4.74489	2.44572
13.37_480.3078m/z	480.308	13.37	LysoPE(18:1(9Z)/0:0)	HMDB0011506	C23H46NO7P	49	-1.42459	3.57846			1.85563
5.83_162.0573m/z	162.057	5.83	trans-S-(1-Propenyl)-L-cysteine	HMDB0029440	C6H11NO2S	49.6	-6.10056	1.12699		2.99081	2.08689
10.62_344.2790m/z	344.279	10.62	Dodecanoylcarnitine	HMDB0002250	C19H37NO4	49.9	-1.42078	2.62744	0.347598	0.0704102	0.207828
5.69_666.1305m/z	666.13	5.69	NADH	HMDB0001487	C21H29N7O14P2	50	-2.35406	7.66727	0.543838	0.324935	0.610504
12.34_502.2915m/z	502.291	12.34	LysoPE(0:0/20:4(8Z,11Z,14Z,17Z))	HMDB0011488	C25H44NO7P	50.4	-2.6	2.77446			3.86608
6.46_146.0594m/z	146.059	6.46	4-formylIndole	96392	C9H7NO	50.4	-4.39856	3.07858	1.55194
1.46_204.1225m/z	204.123	1.46	Acetylcarnitine	956	C9H17NO4	50.5	-2.78318	6.43273	0.474066	0.229493	0.490108
14.58_524.3700m/z	524.37	14.58	LysoPC(18:0)	HMDB0010384	C26H54NO7P	50.5	-2.1114	6.23115	0.484045		2.0518
11.74_468.3079m/z	468.308	11.74	LysoPC(14:0/0:0)	HMDB0010379	C22H46NO7P	50.6	-1.23853	5.12099		4.31285	3.55453
6.50_261.1437m/z	261.144	6.5	gamma-Glutamylleucine	HMDB0011171	C11H20N2O5	50.8	-3.02298	2.71123	2.82105	1.85248	0.66002
6.05_328.1381m/z	328.138	6.05	N-(1-Deoxy-1-fructosyl)phenylalanine	HMDB0037846	C15H21NO7	51	-2.9	1.25033		1.83051
5.78_269.0877m/z	269.088	5.78	Inosine	HMDB0000195	C10H12N4O5	51.6	-1.34816	1.36595		0.240638	0.166337
12.52_167.0698m/z	167.07	12.52	Ethylsalicylate	HMDB0029817	C9H10O3	51.7	-2.92042	2.55538	1.86139	2.44729
1.28_137.0701m/z	137.07	1.28	Trigonellinamide	274	C7H8N2O	51.9	-6.01635	3.693	6.95416	6.47826
2.12_162.0749m/z	162.075	2.12	Glutamate,gamma-methylester	HMDB0061715	C6H11NO4	52.7	-7.08271	1.60171	4.37812	4.09673	2.91829
12.61_375.2881m/z	375.288	12.61	3b-Hydroxy-5-cholenoicacid	HMDB0000308	C24H38O3	52.9	-3.4	2.59032	90.9848	11.6715	0.266375
12.52_195.1009m/z	195.101	12.52	Butylsalicylate	HMDB0040730	C11H14O3	52.9	-3.22442	2.10893	1.81149	2.3919
2.37_308.0909m/z	308.091	2.37	Glutathione	HMDB0000125	C10H17N3O6S	52.9	-0.634135	26.2437	1.83057		0.65033
5.78_284.0983m/z	284.098	5.78	Guanosine	HMDB0000133	C10H13N5O5	53.1	-2.24345	1.12559	0.60754	0.316679	0.544793
12.22_288.1986m/z	288.199	12.22	CAY10444	44894	C15H29NO2S	53.7	-2.13425	2.62491	1.84301	3.03101	1.6287
15.33_135.0794m/z	135.079	15.33	Chavicol	71442	C9H10O	53.7	-7.42522	2.09827		5.53924	2.82969
12.61_357.2782m/z	357.278	12.61	Tetracosahexaenoicacid	HMDB0002007	C24H36O2	54.9	-1.7059	8.44493	163.091	18.1848	0.248813
1.32_114.0652m/z	114.065	1.32	Creatinine	8	C4H7N3O	55	-8.73504	1.12687	1.53341
6.58_359.2278m/z	359.228	6.58	IleGlnVal	17167	C16H30N4O5	55.1	-3.16077	1.34988	1.87515	1.90559
5.78_152.0558m/z	152.056	5.78	Guanine	315	C5H5N5O	55.2	-5.9585	1.44173	0.654297	0.397754
8.29_243.0870m/z	243.087	8.29	Lumichrome	64742	C12H10N4O2	55.5	-2.72738	1.63191		2.12793	4.76882
1.22_184.0728m/z	184.073	1.22	Phosphocholine	3318	C5H14NO4P	56.4	-2.77145	8.63026	5.67004	8.21999
6.19_669.3182m/z	669.318	6.19						2.54645			28.1835
2.32_671.1485m/z	671.149	2.32						1.92091			4.93291
6.77_894.9624m/z	894.962	6.77						1.29386			2.18801
7.00_570.3275m/z	570.327	7						2.3632			1.94664
6.77_716.1714m/z	716.171	6.77						1.48497			1.92883
7.77_781.9941m/z	781.994	7.77						2.19774			1.74683
14.94_466.3272m/z	466.327	14.94						2.79876			1.72045
7.77_977.2405m/z	977.24	7.77						1.50896			1.65494
6.46_421.7578m/z	421.758	6.46						1.2103			1.64942
7.77_977.4914m/z	977.491	7.77						1.4716			1.51484
7.41_712.2238m/z	712.224	7.41						1.10099			0.670429
5.40_648.1475m/z	648.148	5.4						1.5745			0.667161
6.12_702.3701m/z	702.37	6.12						1.23901			0.66492
1.25_489.1908m/z	489.191	1.25						1.54613			0.664172
7.41_766.8554m/z	766.855	7.41						1.52554			0.662545
6.09_676.3357m/z	676.336	6.09						3.78907			0.66075
6.09_676.5863m/z	676.586	6.09						3.17099			0.659537
6.65_820.9735m/z	820.973	6.65						1.92909			0.65384
6.46_637.6460m/z	637.646	6.46						3.40455			0.652148
7.41_830.6759m/z	830.676	7.41						1.65755			0.647586
7.41_996.6092m/z	996.609	7.41						1.42409			0.647257
6.46_637.3123m/z	637.312	6.46						4.15499			0.647235
6.09_676.8362m/z	676.836	6.09						2.38419			0.645705
6.12_701.7024m/z	701.702	6.12						1.9361			0.640074
7.41_830.5924m/z	830.592	7.41						1.9264			0.633623
1.32_641.1992m/z	641.199	1.32						1.23477			0.621456
7.39_857.4713m/z	857.471	7.39						1.36018			0.604308
7.39_857.6717m/z	857.672	7.39						1.18617			0.602125
7.41_779.6112m/z	779.611	7.41						1.4177			0.598699
7.39_779.4286m/z	779.429	7.39						1.37513			0.597878
7.39_857.5718m/z	857.572	7.39						1.20554			0.593198
7.39_952.6341m/z	952.634	7.39						1.31147			0.592128
7.39_714.8109m/z	714.811	7.39						1.16632			0.58982
7.39_857.1709m/z	857.171	7.39						1.1036			0.585468
7.39_857.2709m/z	857.271	7.39						1.33109			0.58516
7.39_857.3709m/z	857.371	7.39						1.51291			0.579131
7.39_779.7933m/z	779.793	7.39						1.07452			0.576421
6.09_901.4449m/z	901.445	6.09						4.42812			0.573807
7.39_952.7453m/z	952.745	7.39						1.12397			0.572145
7.39_952.4117m/z	952.412	7.39						1.23956			0.570949
7.39_714.7273m/z	714.727	7.39						1.3513			0.568674
6.09_901.1105m/z	901.111	6.09						4.74255			0.568011
7.39_779.3374m/z	779.337	7.39						1.08677			0.566929
7.39_779.5204m/z	779.52	7.39						1.49175			0.566425
6.09_901.7787m/z	901.779	6.09						3.52362			0.563986
7.39_714.6446m/z	714.645	7.39						1.42016			0.55324
6.46_955.9661m/z	955.966	6.46						3.36635			0.54926
6.46_955.4641m/z	955.464	6.46						4.07861			0.533576
6.00_615.1252m/z	615.125	6						1.68132			0.520475
6.00_615.3253m/z	615.325	6						1.55593			0.479611
6.00_768.9044m/z	768.904	6						1.20349			0.409205
6.00_768.6541m/z	768.654	6						1.46133			0.383991
6.09_941.1491m/z	941.149	6.09						1.28823			0.380257
6.09_940.4799m/z	940.48	6.09						1.47691			0.341736
15.06_508.3742m/z	508.374	15.06						1.47951	0.641271
1.29_381.0784m/z	381.078	1.29						3.02149	1.51233
6.17_242.0994m/z	242.099	6.17						2.91655	1.55667
5.28_360.0280m/z	360.028	5.28						1.5298	1.5614
6.17_461.2094m/z	461.209	6.17						2.6476	1.57093
6.17_477.1756m/z	477.176	6.17						1.78324	1.60424
6.46_144.0797m/z	144.08	6.46						1.60756	1.60868
10.62_260.1669m/z	260.167	10.62						1.17694	1.62355
6.02_847.5020m/z	847.502	6.02						1.17557	1.63949
15.79_553.4305m/z	553.431	15.79						1.41821	1.64145
13.06_478.3272m/z	478.327	13.06						1.25838	1.70225
1.40_529.9832m/z	529.983	1.4						2.19661	1.71131
16.40_605.4084m/z	605.408	16.4						1.82331	1.73481
2.39_233.0581m/z	233.058	2.39						4.51552	1.80964
15.81_547.3585m/z	547.359	15.81						1.36559	1.81831
6.17_258.0653m/z	258.065	6.17						1.23072	1.82017
6.17_696.2849m/z	696.285	6.17						1.54921	1.84585
2.40_290.0789m/z	290.079	2.4						3.48011	1.8642
6.17_493.1461m/z	493.146	6.17						1.32398	1.91767
5.06_689.0750m/z	689.075	5.06						2.28222	2.02425
0.97_268.9472m/z	268.947	0.97						1.462	2.07681
8.71_755.4046m/z	755.405	8.71						1.59185	2.11772
8.71_755.0705m/z	755.071	8.71						1.82842	2.37861
6.08_120.0807m/z	120.081	6.08						9.31565	1.60463
1.62_725.1662m/z	725.166	1.62						1.90373		0.401875
5.71_325.5574m/z	325.557	5.71						1.09962		0.454422
5.69_334.0704m/z	334.07	5.69						1.95264		0.468524
5.69_333.5691m/z	333.569	5.69						4.16851		0.477087
7.44_647.3412m/z	647.341	7.44						1.30355		0.47786
6.36_688.3501m/z	688.35	6.36						2.24672		0.493376
6.12_993.4958m/z	993.496	6.12						1.75967		0.526691
7.47_834.8975m/z	834.898	7.47						1.07478		0.53567
1.64_646.0395m/z	646.039	1.64						2.39187		0.560002
5.71_325.0562m/z	325.056	5.71						2.09529		0.613466
7.49_881.0585m/z	881.058	7.49						0.990196		0.616563
16.49_672.5248m/z	672.525	16.49						7.0481		1.49678
11.67_327.0072m/z	327.007	11.67						2.22773		1.51256
17.05_380.3353m/z	380.335	17.05						0.999296		1.52229
11.67_331.0011m/z	331.001	11.67						1.50227		1.52713
14.61_463.3416m/z	463.342	14.61						1.20024		1.52922
6.77_280.5098m/z	280.51	6.77						1.96059		1.53525
16.49_435.3666m/z	435.367	16.49						1.50739		1.53544
14.91_644.4934m/z	644.493	14.91						8.17686		1.53735
14.33_501.2832m/z	501.283	14.33						1.48415		1.53984
11.70_479.0944m/z	479.094	11.7						1.76989		1.5441
16.07_892.6546m/z	892.655	16.07						1.3701		1.54826
11.67_252.9961m/z	252.996	11.67						1.48891		1.55103
14.27_498.3978m/z	498.398	14.27						1.22105		1.55231
14.96_600.4671m/z	600.467	14.96						9.20055		1.55245
15.68_658.5091m/z	658.509	15.68						13.2164		1.55669
15.22_492.3627m/z	492.363	15.22						1.41066		1.55869
16.43_540.4463m/z	540.446	16.43						10.5776		1.56166
15.01_556.4410m/z	556.441	15.01						9.96627		1.5637
15.73_614.4831m/z	614.483	15.73						15.5769		1.564
15.06_512.4149m/z	512.415	15.06						10.1362		1.56484
15.16_380.3355m/z	380.336	15.16						2.56803		1.56689
11.82_421.3237m/z	421.324	11.82						2.97916		1.5684
16.35_628.4990m/z	628.499	16.35						6.72202		1.57054
11.94_256.2261m/z	256.226	11.94						1.30245		1.57147
14.31_454.3719m/z	454.372	14.31						1.0765		1.57463
15.09_468.3886m/z	468.389	15.09						9.28156		1.57508
15.79_570.4569m/z	570.457	15.79						16.7232		1.57875
15.09_451.3614m/z	451.361	15.09						1.7865		1.58094
15.13_424.3624m/z	424.362	15.13						6.407		1.58145
15.13_407.3353m/z	407.335	15.13						2.61607		1.58408
10.67_405.0525m/z	405.053	10.67						2.17314		1.58909
15.81_526.4306m/z	526.431	15.81						16.9021		1.59148
16.46_496.4199m/z	496.42	16.46						7.90975		1.59163
15.16_363.3094m/z	363.309	15.16						2.32297		1.59422
10.67_407.0495m/z	407.05	10.67						1.4771		1.59477
15.79_195.1217m/z	195.122	15.79						1.57909		1.6017
16.02_477.3575m/z	477.358	16.02						1.26893		1.60681
15.86_482.4043m/z	482.404	15.86						13.5795		1.61187
15.06_239.1478m/z	239.148	15.06						1.38387		1.61234
15.89_438.3781m/z	438.378	15.89						8.76684		1.62358
14.18_586.4505m/z	586.451	14.18						1.08989		1.62572
16.40_584.4726m/z	584.473	16.4						7.4802		1.63023
11.82_393.2864m/z	393.286	11.82						4.84561		1.66413
5.77_276.1438m/z	276.144	5.77						1.99507		1.66754
15.06_495.3872m/z	495.387	15.06						1.07886		1.68452
11.67_493.1930m/z	493.193	11.67						1.10801		1.69953
15.86_465.3769m/z	465.377	15.86						2.48252		1.70013
9.94_236.1619m/z	236.162	9.94						0.995155		1.70944
0.97_216.9496m/z	216.95	0.97						1.11893		1.71278
10.23_290.2688m/z	290.269	10.23						1.30036		1.75864
13.91_399.2500m/z	399.25	13.91						3.25678		1.79491
14.30_149.0226m/z	149.023	14.3						3.24998		1.80406
0.97_426.8993m/z	426.899	0.97						1.17656		1.81857
0.97_84.9592m/z	84.9592	0.97						1.60625		1.83208
14.71_414.3196m/z	414.32	14.71						1.43804		1.83323
12.22_236.1590m/z	236.159	12.22						1.023		1.83568
0.97_398.9045m/z	398.904	0.97						1.35636		1.84319
11.82_398.2410m/z	398.241	11.82						2.25802		1.86334
1.12_514.8760m/z	514.876	1.12						1.04221		1.89288
15.70_327.2004m/z	327.2	15.7						1.2042		1.89395
0.97_312.9194m/z	312.919	0.97						1.33045		1.90552
10.13_274.2739m/z	274.274	10.13						2.19139		1.91023
13.62_499.2674m/z	499.267	13.62						1.94531		1.91301
10.45_288.2896m/z	288.29	10.45						2.49826		1.9283
7.82_204.1048m/z	204.105	7.82						1.59164		2.09322
11.36_316.3203m/z	316.32	11.36						1.21723		2.24508
15.46_750.5411m/z	750.541	15.46						3.2779		2.27894
18.74_798.5422m/z	798.542	18.74						2.02322		2.38012
3.31_577.9694m/z	577.969	3.31						1.02191		2.65407
14.36_810.5690m/z	810.569	14.36						2.6008		2.91059
18.76_816.5866m/z	816.587	18.76						1.96773		3.34551
15.33_818.6024m/z	818.602	15.33						1.41002		3.72852
18.76_814.5710m/z	814.571	18.76						1.86331		4.34558
6.19_960.4130m/z	960.413	6.19						3.3383		60.8048	4409.82
6.12_274.0908m/z	274.091	6.12						1.33937		1.85019	247.383
12.11_987.6400m/z	987.64	12.11						1.50445		103.673	92.345
6.19_507.2645m/z	507.264	6.19						1.57447		3.53214	38.0092
8.26_200.1426m/z	200.143	8.26						1.99292		21.9187	10.7513
15.33_692.5551m/z	692.555	15.33						7.59261		6.40163	7.34953
12.11_266.6390m/z	266.639	12.11						1.23092		9.02499	5.28058
13.06_991.6709m/z	991.671	13.06						4.72133		3.68031	4.75681
7.11_171.0981m/z	171.098	7.11						1.86297		8.02057	4.46604
7.46_716.7119m/z	716.712	7.46						1.22125		2.84169	3.71533
6.68_576.0817m/z	576.082	6.68						1.17297		2.72326	3.64111
14.10_536.3687m/z	536.369	14.1						1.35542		3.59502	3.49661
11.74_490.2890m/z	490.289	11.74						1.6837		5.08181	3.47925
7.46_717.0460m/z	717.046	7.46						1.10219		2.21866	3.37847
8.67_857.0716m/z	857.072	8.67						1.20442		3.39675	3.33272
6.71_374.2232m/z	374.223	6.71						1.76451		3.34878	3.05813
6.70_747.4379m/z	747.438	6.7						1.55838		2.87582	3.04622
14.10_281.1716m/z	281.172	14.1						2.43184		5.42604	3.00469
11.77_387.1922m/z	387.192	11.77						1.68527		2.07168	2.84116
13.43_288.6403m/z	288.64	13.43						0.990008		3.56437	2.82593
6.68_576.2824m/z	576.282	6.68						1.14658		2.01031	2.6613
18.85_760.5837m/z	760.584	18.85						10.2069		2.8277	2.61611
14.70_458.3458m/z	458.346	14.7						2.91043		4.21273	2.46139
15.33_91.0534m/z	91.0534	15.33						1.61086		4.65676	2.43602
6.39_176.0729m/z	176.073	6.39						1.53039		3.41048	2.42618
6.19_364.6995m/z	364.7	6.19						1.28414		2.96045	2.42399
6.19_728.3927m/z	728.393	6.19						1.99505		2.68537	2.35214
6.00_387.6983m/z	387.698	6						1.5299		1.72894	2.33775
15.33_794.6006m/z	794.601	15.33						6.68788		3.34854	2.32519
18.70_918.5400m/z	918.54	18.7						1.1035		2.3859	2.2609
13.32_570.2806m/z	570.281	13.32						1.03639		2.99729	2.24348
5.72_414.2693m/z	414.269	5.72						1.14487		3.52023	2.22855
12.55_478.3246m/z	478.325	12.55						2.0058		1.91483	2.19797
18.71_850.5528m/z	850.553	18.71						3.25433		2.20327	2.18772
6.19_750.3757m/z	750.376	6.19						1.3071		3.37031	2.17504
15.33_814.6290m/z	814.629	15.33						3.56987		2.94069	2.08361
6.00_774.3881m/z	774.388	6						1.33567		1.6721	2.04239
8.42_331.2050m/z	331.205	8.42						1.28291		2.79158	2.00605
7.00_285.6683m/z	285.668	7						3.40289		1.62752	1.96577
18.25_515.3268m/z	515.327	18.25						1.33199		2.71795	1.9222
7.00_286.1691m/z	286.169	7						1.72528		1.59884	1.91054
0.97_442.8763m/z	442.876	0.97						1.22598		2.01896	1.9064
1.41_160.0595m/z	160.06	1.41						2.30725		2.23692	1.8381
0.99_214.9162m/z	214.916	0.99						1.42412		1.85976	1.72851
11.82_768.5387m/z	768.539	11.82						2.35406		1.94964	1.58259
0.97_198.9394m/z	198.939	0.97						2.25503		1.88699	1.57181
7.41_766.9320m/z	766.932	7.41						1.42778		0.654927	0.654612
8.57_933.8903m/z	933.89	8.57						1.44326		0.646472	0.648932
6.82_850.4338m/z	850.434	6.82						1.22285		0.553352	0.646744
8.59_933.9463m/z	933.946	8.59						1.192		0.616618	0.644064
7.41_906.0095m/z	906.01	7.41						1.82786		0.643694	0.637835
6.65_820.4720m/z	820.472	6.65						2.3794		0.610987	0.637395
10.28_362.3256m/z	362.326	10.28						1.15625		0.595209	0.63613
7.41_906.0999m/z	906.1	7.41						1.60129		0.648225	0.634942
8.59_988.6501m/z	988.65	8.59						2.61513		0.639952	0.634383
7.41_996.5089m/z	996.509	7.41						1.80074		0.645923	0.621011
7.41_712.1521m/z	712.152	7.41						1.54496		0.613235	0.617263
7.15_573.3056m/z	573.306	7.15						1.24819		0.375925	0.61245
8.59_933.7806m/z	933.781	8.59						1.98252		0.593744	0.609968
5.66_241.1537m/z	241.154	5.66						2.53825		0.429487	0.606756
8.57_933.8365m/z	933.837	8.57						1.70113		0.604389	0.606748
7.41_996.4099m/z	996.41	7.41						2.01381		0.589299	0.606647
8.59_988.3550m/z	988.355	8.59						1.11585		0.567459	0.601515
7.41_830.5097m/z	830.51	7.41						2.41037		0.583468	0.595936
10.95_431.0942m/z	431.094	10.95						1.95356		0.664986	0.595437
7.41_712.0803m/z	712.08	7.41						1.89827		0.570031	0.590294
7.41_905.9190m/z	905.919	7.41						2.19543		0.577261	0.587392
6.82_850.1003m/z	850.1	6.82						1.5635		0.525575	0.583275
6.82_849.7657m/z	849.766	6.82						1.63523		0.502823	0.577053
7.39_905.8277m/z	905.828	7.39						2.25208		0.52679	0.568666
7.39_996.3094m/z	996.309	7.39						2.10671		0.541959	0.564655
6.55_510.2567m/z	510.257	6.55						1.13942		0.349048	0.562346
7.39_664.7426m/z	664.743	7.39						1.34528		0.513821	0.561729
7.39_711.9378m/z	711.938	7.39						2.18921		0.490273	0.557908
7.39_766.6255m/z	766.625	7.39						2.59374		0.515231	0.557266
1.22_280.0916m/z	280.092	1.22						3.33402		0.46692	0.555463
7.39_711.8664m/z	711.866	7.39						1.75595		0.485728	0.549791
7.39_905.7367m/z	905.737	7.39						1.82618		0.525546	0.547053
7.39_714.5606m/z	714.561	7.39						1.28695		0.666437	0.544807
6.03_944.1432m/z	944.143	6.03						2.87453		0.663097	0.542002
7.39_664.6095m/z	664.61	7.39						1.74835		0.458643	0.537064
7.39_664.6757m/z	664.676	7.39						1.57992		0.494227	0.535551
7.39_928.4388m/z	928.439	7.39						2.31035		0.472816	0.535048
6.03_944.4780m/z	944.478	6.03						2.33665		0.657829	0.534584
6.88_696.3701m/z	696.37	6.88						1.04768		0.460422	0.53107
5.40_626.1656m/z	626.166	5.4						1.31326		0.475212	0.529597
7.39_928.9405m/z	928.941	7.39						1.96916		0.462566	0.523613
6.55_637.8192m/z	637.819	6.55						1.12676		0.331473	0.521984
7.39_766.4697m/z	766.47	7.39						1.45418		0.485251	0.517125
7.39_664.4757m/z	664.476	7.39						1.25337		0.439711	0.516783
6.55_510.4568m/z	510.457	6.55						1.10298		0.344255	0.513256
7.39_664.5422m/z	664.542	7.39						1.62186		0.446838	0.509981
7.15_573.7076m/z	573.708	7.15						1.04929		0.320461	0.504531
7.39_996.2097m/z	996.21	7.39						1.6136		0.470422	0.498091
7.39_952.5226m/z	952.523	7.39						1.23035		0.544064	0.49463
6.02_943.8092m/z	943.809	6.02						3.5317		0.608872	0.492638
7.15_573.5072m/z	573.507	7.15						1.20425		0.307439	0.492486
8.27_871.4138m/z	871.414	8.27						1.05859		0.332741	0.491336
6.55_637.5686m/z	637.569	6.55						1.19331		0.269978	0.472352
7.80_565.3196m/z	565.32	7.8						1.20988		0.464029	0.448853
7.80_564.9851m/z	564.985	7.8						1.32495		0.409899	0.431488
7.52_733.3918m/z	733.392	7.52						1.00633		0.306676	0.41536
8.29_975.7380m/z	975.738	8.29						1.1352		0.297931	0.40302
6.95_427.1953m/z	427.195	6.95						1.20703		0.269652	0.374477
7.52_733.1913m/z	733.191	7.52						0.996267		0.270235	0.366999
8.15_274.2006m/z	274.201	8.15						1.22696		0.392705	0.355296
6.95_426.6942m/z	426.694	6.95						1.855		0.246331	0.32768
8.27_871.2671m/z	871.267	8.27						0.996218		0.231702	0.302129
7.47_861.0559m/z	861.056	7.47						1.24741		0.178131	0.249384
6.97_501.6239m/z	501.624	6.97						1.85552		0.13062	0.240809
6.97_501.9581m/z	501.958	6.97						1.54221		0.136926	0.237299
7.47_799.6956m/z	799.696	7.47						1.04836		0.138219	0.217296
7.49_799.6239m/z	799.624	7.49						1.09148		0.112473	0.167437
6.74_590.1229m/z	590.123	6.74						1.08933		0.0376062	0.120214
6.31_463.2999m/z	463.3	6.31						2.06533		0.0831755	0.105614
7.58_91.0537m/z	91.0537	7.58						1.3066	2.23471	1.61148
10.97_158.1530m/z	158.153	10.97						1.7014	1.5986	1.8045
11.10_172.1690m/z	172.169	11.1						1.1273	1.70171	2.22887
1.50_79.0202m/z	79.0202	1.5						1.63443	2.66719	2.4362
1.20_146.9807m/z	146.981	1.2						1.17823	3.71351	5.21103
6.06_103.0537m/z	103.054	6.06						3.07937	1.55475
5.03_91.0535m/z	91.0535	5.03						2.17819	1.60208
9.71_335.0522m/z	335.052	9.71						3.46839	-1.77765e+07	-1.15717e+07
14.07_689.4062m/z	689.406	14.07						1.05985	0.187802	0.0172562
5.69_998.6942m/z	998.694	5.69						1.13285	0.219658	0.0288351
13.78_663.3908m/z	663.391	13.78						1.93434	0.0883339	0.0376723
13.78_641.4086m/z	641.409	13.78						1.64281	0.174956	0.0462591
7.77_975.3830m/z	975.383	7.77						1.45071	0.141646	0.149809
7.77_975.8842m/z	975.884	7.77						1.26597	0.14603	0.157911
12.12_412.3385m/z	412.339	12.12						1.42331	0.238442	0.218825
6.77_489.2397m/z	489.24	6.77						1.32687	0.420483	0.293927
2.83_215.0152m/z	215.015	2.83						1.82558	0.460864	0.330239
9.33_709.0922m/z	709.092	9.33						1.27601	0.615583	0.360617
5.98_372.1931m/z	372.193	5.98						2.0762	0.504884	0.365018
1.56_652.0507m/z	652.051	1.56						1.88419	0.552162	0.37422
1.62_630.0696m/z	630.07	1.62						5.45957	0.510484	0.376886
9.33_709.4261m/z	709.426	9.33						1.17741	0.634449	0.391768
8.11_851.9489m/z	851.949	8.11						1.8199	0.411262	0.43089
7.66_938.9829m/z	938.983	7.66						1.21571	0.539532	0.431541
1.25_432.1690m/z	432.169	1.25						1.13455	0.621469	0.441428
8.11_852.4516m/z	852.452	8.11						1.50909	0.398255	0.45641
8.54_948.7770m/z	948.777	8.54						1.3137	0.56146	0.508396
6.42_733.8453m/z	733.845	6.42						1.12516	0.273833	0.518875
16.50_391.3405m/z	391.341	16.5						2.4719	0.604045	0.558462
6.23_964.8122m/z	964.812	6.23						1.74877	0.489293	0.600298
6.23_965.1468m/z	965.147	6.23						1.51216	0.540563	0.634469
16.43_545.4005m/z	545.4	16.43						2.48582	1.54111	1.50586
16.40_589.4270m/z	589.427	16.4						3.0259	1.63019	1.51282
4.42_249.0527m/z	249.053	4.42						1.59397	2.66922	1.54961
14.44_542.4235m/z	542.423	14.44						1.25637	1.59512	1.57624
15.73_635.4111m/z	635.411	15.73						1.51247	1.84059	1.57912
15.79_591.3854m/z	591.385	15.79						1.46783	1.81653	1.58467
15.68_679.4366m/z	679.437	15.68						1.28292	1.64948	1.5874
16.49_239.1477m/z	239.148	16.49						1.14338	1.5444	1.60241
10.24_371.0918m/z	371.092	10.24						1.31033	1.5333	1.60683
15.37_922.6648m/z	922.665	15.37						1.30081	1.51265	1.635
16.31_677.4791m/z	677.479	16.31						2.89352	2.03855	1.63902
15.25_377.3247m/z	377.325	15.25						2.28179	1.75966	1.64377
15.33_878.6391m/z	878.639	15.33						2.49953	1.5395	1.64874
16.35_649.4311m/z	649.431	16.35						1.89191	2.00272	1.65329
0.97_200.9719m/z	200.972	0.97						2.43108	1.77242	1.66341
7.58_216.0626m/z	216.063	7.58						1.51854	2.43584	1.66571
15.54_790.5869m/z	790.587	15.54						7.35957	1.60135	1.6659
7.19_444.4033m/z	444.403	7.19						1.00279	1.53205	1.67682
0.97_410.9215m/z	410.921	0.97						1.19288	2.23682	1.68652
15.73_597.4559m/z	597.456	15.73						1.01931	1.5691	1.68688
0.97_384.9248m/z	384.925	0.97						1.25883	1.97893	1.68717
15.27_333.2986m/z	333.299	15.27						1.38082	1.74766	1.68767
0.97_640.8807m/z	640.881	0.97						1.13451	2.24589	1.69947
6.31_413.1402m/z	413.14	6.31						1.25697	2.16517	1.70153
1.50_331.0523m/z	331.052	1.5						1.29652	1.57529	1.71326
15.27_394.3511m/z	394.351	15.27						2.25414	1.81512	1.73389
0.97_182.9621m/z	182.962	0.97						2.98944	1.86683	1.76859
15.77_239.1479m/z	239.148	15.77						1.12601	1.49836	1.78005
1.38_545.9587m/z	545.959	1.38						2.02776	2.44951	1.99361
5.46_561.9203m/z	561.92	5.46						1.82149	1.85405	2.01413
15.27_350.3250m/z	350.325	15.27						1.09826	1.93677	2.03706
1.53_589.0422m/z	589.042	1.53						1.93513	2.48418	2.04443
5.55_545.9485m/z	545.948	5.55						1.66177	1.8658	2.07544
10.90_555.2904m/z	555.29	10.9						1.50917	1.6931	2.07614
1.12_718.8347m/z	718.835	1.12						1.03639	1.54934	2.13106
1.10_424.8932m/z	424.893	1.1						1.07015	1.70582	2.13366
1.47_522.0862m/z	522.086	1.47						1.12626	2.87622	2.21597
13.03_499.2676m/z	499.268	13.03						1.10233	1.83703	2.30937
7.19_178.0850m/z	178.085	7.19						1.02465	1.71686	2.51495
1.12_242.9246m/z	242.925	1.12						1.46567	1.93178	2.6312
3.52_529.9832m/z	529.983	3.52						3.80895	3.5459	2.66293
1.12_446.8862m/z	446.886	1.12						1.13403	1.80106	2.66522
1.20_228.0364m/z	228.036	1.2						1.37762	2.65039	3.00875
3.73_549.9697m/z	549.97	3.73						2.32494	3.14714	3.21432
1.25_476.1591m/z	476.159	1.25						1.84339	4.18797	3.3102
7.49_507.8126m/z	507.813	7.49						1.20602	2.43612	3.33879
1.22_374.1046m/z	374.105	1.22						1.3367	2.59826	3.43535
4.01_561.9206m/z	561.921	4.01						3.34821	4.24202	3.99239
13.72_546.3624m/z	546.362	13.72						1.63366	5.94468	4.00659
3.70_545.9494m/z	545.949	3.7						3.38251	4.57047	4.06806
1.12_258.8983m/z	258.898	1.12						1.11156	3.44623	4.57235
1.23_441.1747m/z	441.175	1.23						2.60951	6.18254	5.01476
1.22_206.0547m/z	206.055	1.22						3.91756	3.97013	5.78284
1.22_222.0283m/z	222.028	1.22						2.80025	6.59424	8.80541
1.65_536.9014m/z	536.901	1.65						0.998662	7.30813	12.5106
1.53_521.9398m/z	521.94	1.53						1.16097	15.7174	18.5192
9.72_497.1766m/z	497.177	9.72						1.0681	90.6394	65.2195
9.71_358.1276m/z	358.128	9.71						2.14599	2417.55	1766.7
11.80_492.3069m/z	492.307	11.8						1.20919	2.29891	14.0132	7.25359
6.12_578.3026m/z	578.303	6.12						1.54751	0.527718		7.17903
13.60_284.3302m/z	284.33	13.6						1.79806	0.450026		6.5982
9.39_252.1045m/z	252.105	9.39						1.10332	2.98567	9.05098	6.24561
6.93_706.3974m/z	706.397	6.93						1.25921	0.174462		6.14545
13.04_546.3538m/z	546.354	13.04						3.86689	1.635	6.22558	4.17649
7.00_328.1191m/z	328.119	7						1.15469	3.37938	8.69269	3.70454
13.43_520.7179m/z	520.718	13.43						1.06809	2.01427	4.25488	3.6807
12.85_592.3355m/z	592.336	12.85						1.44405	1.76399	6.33715	3.67215
6.25_392.1474m/z	392.147	6.25						1.58551	2.97653	3.99483	3.19027
12.52_590.3202m/z	590.32	12.52						1.46597	1.58735	4.63996	3.11944
7.68_702.8414m/z	702.841	7.68						1.27353	0.487192		3.0236
7.68_843.2076m/z	843.208	7.68						1.13109	0.533789		2.84825
14.68_502.3720m/z	502.372	14.68						3.97687	1.62531	5.75582	2.82284
6.77_715.9710m/z	715.971	6.77						1.43678	0.539992		2.73745
6.77_894.7115m/z	894.712	6.77						1.26791	0.544341		2.73457
7.68_703.0084m/z	703.008	7.68						1.19599	0.513529		2.70169
14.64_546.3974m/z	546.397	14.64						4.8374	2.45341	8.22463	2.67613
7.66_944.5084m/z	944.508	7.66						1.52162	0.620423	1.5022	2.66058
7.68_703.1752m/z	703.175	7.68						1.04585	0.525398		2.5925
6.50_511.0299m/z	511.03	6.5						1.30946	0.615816	1.59414	2.58137
14.59_590.4247m/z	590.425	14.59						5.11022	2.84744	8.96839	2.47954
14.68_507.3276m/z	507.328	14.68						1.21298	0.651568		2.35812
7.68_843.4086m/z	843.409	7.68						1.08176	0.576056		2.2029
7.11_421.6524m/z	421.652	7.11						1.30666	1.91552	3.17534	2.05646
6.77_716.5722m/z	716.572	6.77						1.11977	0.637515		1.94816
6.77_716.3717m/z	716.372	6.77						1.39628	0.623968		1.92547
10.45_260.1669m/z	260.167	10.45						1.21335	1.57008	2.98341	1.91731
6.90_914.9539m/z	914.954	6.9						1.11526	0.651478		1.89501
6.79_400.2399m/z	400.24	6.79						1.34728	0.51957		1.83722
7.11_421.1511m/z	421.151	7.11						2.20553	1.88689	2.99443	1.77083
5.69_570.3228m/z	570.323	5.69						1.05767	0.201422	0.31086	1.71266
6.17_488.7278m/z	488.728	6.17						1.18938	0.619865		1.68643
13.66_191.0848m/z	191.085	13.66						2.3679	1.94653	3.08828	1.5842
11.59_319.1441m/z	319.144	11.59						1.68567	1.50741		0.653437
5.95_488.6853m/z	488.685	5.95						1.6156	0.396619	0.260787	0.652521
6.77_611.2947m/z	611.295	6.77						1.30026	0.376311	0.23799	0.649984
12.17_581.3067m/z	581.307	12.17						3.61303	1.708		0.639966
6.68_589.6224m/z	589.622	6.68						3.67019	1.56048		0.629459
6.68_589.2887m/z	589.289	6.68						5.57497	1.59493		0.623998
6.68_588.9545m/z	588.955	6.68						6.6881	1.64264		0.617113
12.25_621.2989m/z	621.299	12.25						1.71989	1.71232		0.59374
9.71_647.1154m/z	647.115	9.71						4.80183	1.14819e+08	5.46759e+07	0.589046
5.85_261.1435m/z	261.144	5.85						1.8709	0.58581	0.342138	0.584012
5.98_557.7850m/z	557.785	5.98						1.37477	0.375293	0.215013	0.583302
6.77_814.3902m/z	814.39	6.77						1.29684	0.351283	0.198069	0.580545
5.98_372.5274m/z	372.527	5.98						1.46149	0.406648	0.232353	0.579445
6.15_601.3325m/z	601.332	6.15						1.54661	1.55967		0.576393
7.58_618.1743m/z	618.174	7.58						1.27423	3.43507	1.94598	0.573811
6.14_449.2225m/z	449.223	6.14						1.87188	1.79861		0.572374
5.72_435.2073m/z	435.207	5.72						1.2415	1.566		0.553253
6.77_489.0369m/z	489.037	6.77						1.75652	0.382631	0.202103	0.54264
7.41_652.3663m/z	652.366	7.41						3.30704	0.356755	0.187524	0.53782
6.77_488.8367m/z	488.837	6.77						2.10442	0.386151	0.202619	0.535801
7.41_652.8674m/z	652.867	7.41						2.47184	0.361305	0.187546	0.534585
5.95_976.3633m/z	976.363	5.95						1.28035	0.318866	0.172438	0.532745
6.68_883.4285m/z	883.428	6.68						2.93913	1.51711		0.530575
6.77_610.7941m/z	610.794	6.77						2.1411	0.379112	0.192196	0.520978
6.77_813.7210m/z	813.721	6.77						1.6846	0.292148	0.142723	0.519149
6.77_611.0442m/z	611.044	6.77						1.75607	0.371936	0.190226	0.515735
6.68_882.9272m/z	882.927	6.68						3.6005	1.55667		0.515132
6.21_436.2273m/z	436.227	6.21						1.09074	1.66041		0.514275
6.77_488.6362m/z	488.636	6.77						2.11424	0.337832	0.168621	0.503368
6.77_610.5431m/z	610.543	6.77						2.11477	0.355801	0.171949	0.485921
6.67_543.2465m/z	543.246	6.67						1.21488	0.256733	0.114534	0.474755
1.38_639.0699m/z	639.07	1.38						1.65677	2.37503		0.470413
12.59_414.3563m/z	414.356	12.59						1.74068	0.142912	0.0739756	0.459433
6.77_814.0560m/z	814.056	6.77						1.59288	0.385902	0.15985	0.433895
6.09_940.8146m/z	940.815	6.09						1.63517	2.00346		0.429273
1.25_193.1176m/z	193.118	1.25						4.47824	295.737		0.423473
13.91_356.2784m/z	356.278	13.91						2.35284	28.8403	5.95068	0.422953
6.67_543.4979m/z	543.498	6.67						1.30614	0.309541	0.116987	0.410336
6.95_852.3800m/z	852.38	6.95						1.09257	0.464675	0.172297	0.364754
14.84_496.3840m/z	496.384	14.84						1.81722	0.105925	0.0277775	0.338667
13.90_400.3033m/z	400.303	13.9						5.37482	105.359	16.9255	0.338455
13.99_553.2751m/z	553.275	13.99						1.80367	5.1055		0.334174
13.90_405.2601m/z	405.26	13.9						2.75807	25.0582	3.71063	0.325809
13.88_444.3313m/z	444.331	13.88						9.49931	73.0449	10.3136	0.324069
13.88_449.2858m/z	449.286	13.88						3.42794	70.6423	9.81795	0.323902
13.85_493.3119m/z	493.312	13.85						4.02337	99.5357	12.9537	0.320493
7.15_520.3314m/z	520.331	7.15						2.1223	11.0798	1.5497	0.313949
13.72_625.3901m/z	625.39	13.72						3.56744	140.016	15.7576	0.306587
13.85_471.3303m/z	471.33	13.85						3.65978	55.784	6.44274	0.305473
13.85_488.3572m/z	488.357	13.85						12.8583	111.561	13.9998	0.304482
13.76_559.3824m/z	559.382	13.76						4.02993	105.181	10.0795	0.303296
8.78_901.0076m/z	901.008	8.78						0.984696	0.375805	0.110945	0.299468
13.20_454.3870m/z	454.387	13.2						2.55759	0.211232	0.0641647	0.296614
8.54_916.1426m/z	916.143	8.54						1.34037	0.487301	0.13918	0.295862
13.81_515.3561m/z	515.356	13.81						3.86784	84.6168	8.89236	0.295366
13.63_713.4429m/z	713.443	13.63						3.33012	197.315	20.0878	0.294871
13.81_532.3835m/z	532.384	13.81						15.8665	115.158	13.6654	0.29391
13.54_801.4957m/z	801.496	13.54						2.39432	40.7431	4.31673	0.290945
13.67_669.4166m/z	669.417	13.67						3.554	128.764	13.9893	0.287024
13.76_576.4100m/z	576.41	13.76						17.2711	141.011	15.883	0.284431
11.74_398.3256m/z	398.326	11.74						4.83621	0.136247	0.0374675	0.28322
13.72_603.4084m/z	603.408	13.72						4.0951	163.694	13.6363	0.276565
8.54_781.5951m/z	781.595	8.54						1.35329	0.456389	0.121619	0.272021
13.72_620.4360m/z	620.436	13.72						17.3217	143.155	16.4352	0.270827
7.26_564.3576m/z	564.358	7.26						2.22589	15.6519	1.66884	0.268549
13.59_735.4878m/z	735.488	13.59						3.01183	39.2719	4.30877	0.267818
13.54_407.2870m/z	407.287	13.54						2.1598	47.7877	6.73094	0.267582
13.67_664.4623m/z	664.462	13.67						16.6446	137.369	15.6062	0.261613
13.67_647.4349m/z	647.435	13.67						3.93667	146.87	11.8289	0.261367
12.61_339.2673m/z	339.267	12.61						1.91575	26.8529	3.18946	0.261133
13.45_451.3136m/z	451.314	13.45						5.15511	165.468	15.3649	0.259666
13.49_429.3006m/z	429.301	13.49						4.54843	72.6845	7.55182	0.258397
13.54_796.5418m/z	796.542	13.54						11.0107	120.461	11.7402	0.256496
13.63_691.4606m/z	691.461	13.63						3.57708	240.557	17.619	0.256389
13.63_708.4884m/z	708.488	13.63						15.27	157.299	16.2118	0.255612
8.54_916.0725m/z	916.072	8.54						1.43558	0.453026	0.114611	0.245578
13.49_420.7872m/z	420.787	13.49						2.5989	421.835	37.3844	0.243119
13.59_757.4696m/z	757.47	13.59						3.00127	354.142	26.1711	0.241463
13.49_429.8017m/z	429.802	13.49						2.77185	305.008	29.1379	0.235862
13.36_495.3395m/z	495.339	13.36						3.42999	164.626	12.7765	0.228935
13.40_473.8278m/z	473.828	13.4						2.88053	354.866	28.3949	0.226186
13.36_495.8409m/z	495.841	13.36						2.38202	324.393	24.6972	0.224612
13.40_473.3270m/z	473.327	13.4						4.62959	127.448	11.2213	0.221688
6.44_276.1792m/z	276.179	6.44						1.1505	0.192088	0.0420841	0.21945
13.28_539.3651m/z	539.365	13.28						2.07843	70.9944	5.94327	0.217352
13.32_517.3525m/z	517.352	13.32						2.87479	125.593	10.6102	0.21726
7.09_560.3266m/z	560.327	7.09						2.88545	11.672		0.216468
13.45_442.8003m/z	442.8	13.45						2.38393	1944.36	217.945	0.207837
13.45_451.8146m/z	451.815	13.45						3.20642	480.897	37.5579	0.204864
13.45_884.5933m/z	884.593	13.45						5.08426	531.934	30.8722	0.204569
13.40_928.6190m/z	928.619	13.4						3.41397	1339.53	76.8082	0.201308
13.40_464.8131m/z	464.813	13.4						1.86191	4434.73	342.703	0.198335
13.34_335.2780m/z	335.278	13.34						1.80765	0.107593	0.0187885	0.190436
13.36_972.6451m/z	972.645	13.36						2.22449	2482.75	109.415	0.189518
12.22_444.3669m/z	444.367	12.22						1.15956	0.065247	0.0119531	0.18638
12.42_529.3564m/z	529.356	12.42						1.06308	3.37048	0.580781	0.174507
13.03_572.3344m/z	572.334	13.03						1.73565	0.560111	0.0868587	0.167101
7.20_604.3524m/z	604.352	7.2						2.99254	49.1649	2.55165	0.133472
7.41_692.4045m/z	692.404	7.41						2.58326	130.022	5.92743	0.118771
7.51_736.4308m/z	736.431	7.51						2.16735	185.319	7.76107	0.110323
7.84_650.8973m/z	650.897	7.84						2.35636	29.3575		0.0996454
7.80_628.3823m/z	628.382	7.8						3.41406	91.2795	3.85522	0.098287
7.80_628.8838m/z	628.884	7.8						2.40449	134.199	5.76756	0.0968329
7.66_562.3426m/z	562.343	7.66						2.69002	85.7179	3.73361	0.0939449
7.70_584.3557m/z	584.356	7.7						3.02444	123.343	5.01673	0.0914681
7.70_584.8578m/z	584.858	7.7						2.08134	175.095	7.01486	0.0898311
7.75_606.3687m/z	606.369	7.75						3.26038	100.187	3.82187	0.0868276
7.84_650.3951m/z	650.395	7.84						3.38925	130.92	5.05773	0.0844906
7.95_716.4344m/z	716.434	7.95						2.7232	44.791		0.0772306
7.87_672.4081m/z	672.408	7.87						3.3018	266.021	9.26246	0.0764049
7.75_606.8718m/z	606.872	7.75						2.33335	115.603	4.27899	0.0711316
6.74_491.3310m/z	491.331	6.74						1.67724	1.79348	0.10216	0.0663513
7.87_672.9097m/z	672.91	7.87						2.37297	394.251	11.461	0.0636206
7.92_694.4210m/z	694.421	7.92						3.18224	174.125	5.96822	0.0632843
7.92_694.9227m/z	694.923	7.92						2.33649	1495.25	29.7444	0.0532262
7.98_738.4478m/z	738.448	7.98						2.57908	176.651		0.0330034
13.45_963.7115m/z	963.712	13.45						1.17706	0.110331	4.34359e-09	6.05804e-08

## Sheet: RPLC-NEG
Table S3. The key information of 316 differential metabolite features obtained by RPLC-NEG analysis mode
Metabolic feature	m/z	RT(min)	Metabolite name	Metabolite ID	Formula	Score	Mass Error(ppm)	VIP	FC(16/DMSO)	FC(32/DMSO)	FC(32/16)
6.91_476.1699m/z	476.17	6.91	Pralatrexate	85196	C23H23N7O5	39.6	2.30165	1.60696		25.4008
13.67_564.2391m/z	564.239	13.67	GluArgPheAsp	133162	C24H35N7O9	39.6	-5.82416	1.21772			7.14759
6.32_385.1394m/z	385.139	6.32	Val-HoPhe-OH	65342	C20H22N2O6	39.7	-2.74814	2.81909	2.07855		0.549981
6.72_377.1918m/z	377.192	6.72	Pentosidine	HMDB0003933	C17H26N6O4	40.2	-6.63769	1.10941	1.94337		0.526222
5.24_330.0606m/z	330.061	5.24	Deoxyadenosinemonophosphate	HMDB0000905	C10H14N5O6P	40.3	-0.780816	1.28614		35.8416	283.469
5.56_407.1718m/z	407.172	5.56	3-O-MethylniveusinA	HMDB0039084	C21H28O8	40.6	1.59627	4.56968	1.68452
0.84_313.1118m/z	313.112	0.84	6-Hydroxyenterolactone	HMDB0041700	C18H18O5	40.6	11.5996	1.15632	2.34807	4.41363
8.63_578.1606m/z	578.161	8.63	5,7-dihydroxy-2-(4-hydroxyphenyl)-3-[(3,4,5-trihydroxy-6-{[(3,4,5-trihydroxy-6-methyloxan-2-yl)oxy]methyl}oxan-2-yl)oxy]-1Î»â´-chromen-1-ylium	HMDB0140837	C27H31O14+	40.9	-6.08887	1.29291	15.253
5.46_447.1550m/z	447.155	5.46	HoPhe-HoPhe-OH	65354	C25H24N2O6	41	-2.48294	1.32413		69.6258	45.0446
8.01_730.4519m/z	730.452	8.01	PE(18:4(6Z,9Z,12Z,15Z)/18:4(6Z,9Z,12Z,15Z))	HMDB0009195	C41H66NO8P	41.2	8.94168	2.74366	0.324959	0.0719499	0.221298
7.08_725.1936m/z	725.194	7.08	6-[(2-{4-[(3-{[3,4-dihydroxy-4-(hydroxymethyl)oxolan-2-yl]oxy}-4,5-dihydroxy-6-(hydroxymethyl)oxan-2-yl)oxy]phenyl}-4-oxo-3,4-dihydro-2H-1-benzopyran-7-yl)oxy]-3,4,5-trihydroxyoxane-2-carboxylicacid	HMDB0124935	C32H38O19	41.4	0.209219	1.14277		16.3506
6.09_500.3075m/z	500.308	6.09	IleGluLeuLys	160867	C23H43N5O7	41.4	-2.96949	1.55503	0.389549	0.41265
10.24_478.2926m/z	478.293	10.24	LysoPE(18:1(9Z)/0:0)	HMDB0011506	C23H46NO7P	41.8	-2.79734	1.35838	0.596923
9.43_371.0588m/z	371.059	9.43	6-{[3-(3,4-dihydroxyphenyl)-2-oxopropanoyl]oxy}-3,4,5-trihydroxyoxane-2-carboxylicacid	HMDB0125449	C15H16O11	41.9	-8.55754	4.26582		0.482532	0.644585
5.37_255.0442m/z	255.044	5.37	N1,N4-Diacetylsulfanilamide	2528	C10H12N2O4S	42	-1.04737	1.68245	16.6635	10.2473	0.615923
10.89_452.2770m/z	452.277	10.89	LysoPE(16:0/0:0)	HMDB0011503	C21H44NO7P	42.6	-2.6886	1.80421		2.86384	5.28759
5.33_134.0472m/z	134.047	5.33	Adenine	HMDB0000034	C5H5N5	43	-0.143974	5.45394	0.332239	0.63405
5.62_682.1284m/z	682.128	5.62	(6S)-6-beta-hydroxy-1,4,5,6-tetrahydronicotinamide-adeninedinucleotide	HMDB0059644	C21H31N7O15P2	43.3	0.520084	2.70245		7.30655e+07	1.28427e+08
6.09_277.1551m/z	277.155	6.09	Leucyl-phenylalanine	HMDB0013243	C15H22N2O3	43.3	-2.5251	1.02763			0.503922
7.61_351.1011m/z	351.101	7.61	Penicilloicacid	HMDB0060617	C16H20N2O5S	43.5	-2.58294	2.59571		3.04166
7.22_629.3515m/z	629.351	7.22	GoshonosideF7	HMDB0038378	C32H54O12	44.2	-4.37628	1.3813		1.78404
13.40_284.2224m/z	284.222	13.4	Myristoylglycine	HMDB0013250	C16H31NO3	44.3	-2.59868	1.21528	0.32343	0.147178	0.454079
14.13_301.2166m/z	301.217	14.13	Eicosapentaenoicacid	HMDB0001999	C20H30O2	45.6	-2.23658	1.25402		5.44595	6.46595
12.63_466.2927m/z	466.293	12.63	1-Heptadecanoylglycerophosphoethanolamine	HMDB0061691	C22H46NO7P	45.7	-2.58463	1.25946		11.9742	17.9449
6.30_192.0669m/z	192.067	6.3	Phenylacetylglycine	HMDB0000821	C10H11NO3	45.7	1.34069	13.6532	2.03034
11.46_500.2776m/z	500.278	11.46	LysoPE(20:4(5Z,8Z,11Z,14Z)/0:0)	HMDB0011517	C25H44NO7P	45.9	-1.42025	3.1609		7.46539	13.7856
2.67_267.0732m/z	267.073	2.67	Inosine	HMDB0000195	C10H12N4O5	45.9	-0.943676	4.61867	0.438396	0.000500794	0.00117425
5.77_440.1316m/z	440.132	5.77	Folicacid	HMDB0000121	C19H19N7O6	46.1	-1.79088	3.84157		59.6134	320.312
0.77_191.0196m/z	191.02	0.77	Citricacid	HMDB0000094	C6H8O7	46.1	-0.431287	1.48955	0.343104	0.312489
7.35_437.0858m/z	437.086	7.35	Riboflavincyclic-4',5'-phosphate	HMDB0059614	C17H19N4O8P	46.2	-2.16609	1.96783		0.513232
14.74_303.2324m/z	303.232	14.74	Arachidonicacid	HMDB0001043	C20H32O2	46.3	-1.69442	1.37525		4.4816	6.43378
2.88_94.9804m/z	94.9804	2.88	Silicicacid	HMDB0031436	H4O4Si	46.5	-2.45584	1.11622		0.0881219	0.080432
0.87_277.0729m/z	277.073	0.87	8-(1,2-dihydroxypropan-2-yl)-9-hydroxy-2H,8H,9H-furo[2,3-h]chromen-2-one	HMDB0128947	C14H14O6	46.6	4.10072	1.22686		3.29356	2.16107
11.40_476.2774m/z	476.277	11.4	LysoPE(0:0/18:2(9Z,12Z))	HMDB0011477	C23H44NO7P	46.7	-1.78418	1.3748	0.315702	4.26182	13.5423
12.06_480.3085m/z	480.308	12.06	LysoPC(15:0)	HMDB0010381	C23H48NO7P	46.7	-2.17472	2.21324		2.22919	3.68826
13.29_480.3093m/z	480.309	13.29	LysoPE(0:0/18:0)	HMDB0011129	C23H48NO7P	46.8	-0.475101	4.2576		4.75091	8.56211
0.95_323.0282m/z	323.028	0.95	Uridine5'-monophosphate	HMDB0000288	C9H13N2O9P	47.3	-1.35841	4.40346		15.919	5.27191
3.52_258.1816m/z	258.182	3.52	Isoleucyl-Lysine	HMDB0028912	C12H25N3O3	47.4	-2.57064	1.26901	1.78686	0.163005	0.0957807
11.00_474.2614m/z	474.261	11	LysoPE(0:0/18:3(6Z,9Z,12Z))	HMDB0011478	C23H42NO7P	47.7	-2.55995	1.19452	0.175608		16.227
4.92_267.0732m/z	267.073	4.92	Inosine	HMDB0000195	C10H12N4O5	47.8	-1.10194	2.54591		69.2119	150.024
5.65_203.0023m/z	203.002	5.65	O-methoxycatechol-O-sulphate	HMDB0060013	C7H8O5S	48.1	1.41992	5.03835		3.22895e+07	7.54888e+06
0.98_426.0213m/z	426.021	0.98	Adenosine3',5'-diphosphate	HMDB0000061	C10H15N5O10P2	48.2	-1.91339	8.56876		4.04626
11.06_498.2621m/z	498.262	11.06	LysoPE(20:5(5Z,8Z,11Z,14Z,17Z)/0:0)	HMDB0011519	C25H42NO7P	48.4	-1.10206	4.8047		9.3704	12.1209
2.50_283.0678m/z	283.068	2.5	Xanthosine	HMDB0000299	C10H12N4O6	48.7	-1.99027	1.22735	0.399907	0.0213142	0.0506763
11.38_830.5916m/z	830.592	11.38	PS(15:0/24:1(15Z))	HMDB0112341	C45H86NO10P	48.8	-0.0235898	3.83191	2.4563
0.87_505.9876m/z	505.988	0.87	Adenosinetriphosphate	HMDB0000538	C10H16N5O13P3	48.9	-1.6519	4.34747		10.2904
10.43_293.1756m/z	293.176	10.43	TanacetolA	HMDB0035722	C17H26O4	49	-0.871417	2.5035		2.97511	2.15347
5.13_292.1300m/z	292.13	5.13	Glutaminylphenylalanine	HMDB0028804	C14H19N3O4	49.4	-0.87631	2.14778	1.80309
6.80_202.1086m/z	202.109	6.8	N-lactoyl-Leucine	HMDB0062176	C9H17NO4	49.5	0.648985	3.91273	1.58104		0.494656
7.44_236.0931m/z	236.093	7.44	N-lactoyl-Phenylalanine	HMDB0062175	C12H15NO4	49.6	1.08883	2.53357		0.465356	0.494284
2.75_172.9916m/z	172.992	2.75	Phenolsulphate	HMDB0060015	C6H6O4S	49.6	0.992587	1.97722		0.216413
5.18_218.1037m/z	218.104	5.18	Pantothenicacid	HMDB0000210	C9H17NO5	50.2	1.33399	15.8758		2373.83	960.078
3.42_166.0508m/z	166.051	3.42	Pyridoxal(VitaminB6)	2203	C8H9NO3	50.2	-1.02768	1.28423		195.849	641.904
2.60_150.0560m/z	150.056	2.6	3alpha,4,7,7alpha-Tetrahydro-1H-isoindole-1,3(2H)-dione	HMDB0033903	C8H9NO2	50.4	-0.591966	2.46639		0.000318545	0.000248998
2.75_166.0507m/z	166.051	2.75	Pyridoxal	HMDB0001545	C8H9NO3	50.6	-1.40782	1.47214		0.00975388	0.00909492
5.33_266.0896m/z	266.09	5.33	Deoxyguanosine	HMDB0000085	C10H13N5O4	50.6	0.363544	6.96959	0.299651	0.358719
0.87_367.1052m/z	367.105	0.87	3-O-Feruloylquinicacid	HMDB0030669	C17H20O9	50.7	4.83549	2.65048		1.67383	1.76309
10.01_163.0762m/z	163.076	10.01	2-Phenylbutyricacid	HMDB0000329	C10H12O2	50.8	-1.43123	1.36083		2.45622
0.98_134.0469m/z	134.047	0.98	Adenine	HMDB0000034	C5H5N5	51.3	-2.31821	2.02242	2.3553	3.34585
5.67_293.1125m/z	293.113	5.67	gamma-Glutamylphenylalanine	HMDB0000594	C14H18N2O5	51.4	-6.01025	1.22999		60.2704	18.2809
2.60_168.0666m/z	168.067	2.6	6-Acetyl-2,3-dihydro-2-(hydroxymethyl)-4(1H)-pyridinone	HMDB0035178	C8H11NO3	51.7	-0.0523751	2.99658		0.00106288	0.0009362
2.57_243.0623m/z	243.062	2.57	Uridine	HMDB0000296	C9H12N2O6	51.7	0.277246	3.36979		2.21171	1.87928
0.77_132.0303m/z	132.03	0.77	L-Asparticacid	HMDB0000191	C4H7NO4	52.4	0.201264	3.17175	3.60549	2.7941
3.39_168.0666m/z	168.067	3.39	6-Acetyl-2,3-dihydro-2-(hydroxymethyl)-4(1H)-pyridinone	HMDB0035178	C8H11NO3	52.8	0.0319074	2.70795			560.627
5.54_392.1125m/z	392.113	5.54	gamma-L-Glutamyl-S-(2-carboxy-1-propyl)cysteinylglycine	HMDB0029394	C14H23N3O8S	52.8	-2.17507	1.68832		1176.03	982.187
2.44_181.0502m/z	181.05	2.44	Hydroxyphenyllacticacid	HMDB0000755	C9H10O4	52.8	-2.57938	1.14464	0.467952	0.00474982	0.0105295
5.51_176.0385m/z	176.038	5.51	Cycloalliin	HMDB0029417	C6H11NO3S	53.5	-1.29323	1.13721		2.66326e+07	1010.66
2.61_190.0537m/z	190.054	2.61	N-Acetyl-L-methionine	HMDB0011745	C7H13NO3S	53.8	-3.248	1.24006	2.26454	0.000538161	0.000239384
6.69_172.9910m/z	172.991	6.69	Phenolsulphate	HMDB0060015	C6H6O4S	54.2	-2.18302	2.51307			18006.4
8.80_311.0556m/z	311.056	8.8	AflatoxinB1	41030	C17H12O6	54.7	-1.51002	3.11419	-2.51235e+07	-1.67234e+07
5.28_259.1293m/z	259.129	5.28	gamma-Glutamylleucine	HMDB0011171	C11H20N2O5	54.8	-2.62237	1.64811		3487.87	-1.70301e+08
0.96_133.0504m/z	133.05	0.96	2,3-Dihydroxy-2-methylbutanoicacid	HMDB0029576	C5H10O4	55	-1.86325	1.58289	0.140636	0.0519685
2.56_662.1022m/z	662.102	2.56	Nicotinamideadeninedinucleotide(NAD)	101	C21H27N7O14P2	56	0.567826	3.64413		0.022994	0.0246136
5.06_662.1030m/z	662.103	5.06	Nicotinamideadeninedinucleotide(NAD)	101	C21H27N7O14P2	56.7	1.77549	14.1784		1900.77	1602.39
11.16_215.1651m/z	215.165	11.16	3-Hydroxydodecanoicacid	HMDB0000387	C12H24O3	58.1	-0.787872	1.34296	0.162652	0.0758702
6.83_889.7273m/z	889.727	6.83						1.27391	0.107562
6.83_890.0614m/z	890.061	6.83						1.26502	0.154663
5.77_867.4948m/z	867.495	5.77						1.16188	0.15476
7.33_840.9475m/z	840.947	7.33						1.10717	0.194485
13.77_554.3814m/z	554.381	13.77						1.25135	0.198467
7.33_840.4463m/z	840.446	7.33						1.32328	0.20231
6.56_425.6580m/z	425.658	6.56						1.60013	0.263406
6.56_852.3247m/z	852.325	6.56						1.71858	0.276231
6.18_793.3291m/z	793.329	6.18						1.17579	0.425503
7.09_523.7373m/z	523.737	7.09						1.10119	0.454771
5.85_785.8510m/z	785.851	5.85						1.0595	0.469608
5.41_691.8278m/z	691.828	5.41						1.5269	0.493986
0.80_268.8007m/z	268.801	0.8						1.17081	0.551746
7.37_807.8296m/z	807.83	7.37						1.21051	0.624665
7.37_807.3287m/z	807.329	7.37						1.47231	0.63159
7.99_959.4532m/z	959.453	7.99						1.41527	1.52484
5.26_959.4814m/z	959.481	5.26						1.31765	1.54118
0.77_102.0560m/z	102.056	0.77						1.12142	1.55793
8.02_439.2072m/z	439.207	8.02						1.22079	1.56309
6.78_201.1032m/z	201.103	6.78						1.65678	1.63568
1.42_319.0767m/z	319.077	1.42						3.56806	1.69587
7.35_891.4631m/z	891.463	7.35						1.59343	1.71908
5.56_655.3102m/z	655.31	5.56						2.46366	1.72931
7.72_733.8567m/z	733.857	7.72						1.74732	1.75197
7.72_733.3565m/z	733.356	7.72						2.20073	1.76358
5.56_611.2618m/z	611.262	5.56						1.2256	1.9736
6.30_74.0247m/z	74.0247	6.3						3.34677	1.98699
1.40_490.1096m/z	490.11	1.4						1.48181	2.0402
6.78_832.3608m/z	832.361	6.78						1.49398	2.25203
7.97_642.2240m/z	642.224	7.97						1.91552	2.29326
9.80_490.2219m/z	490.222	9.8						1.78197	2.34614
8.11_961.5006m/z	961.501	8.11						2.4001	2.52857
8.11_480.2464m/z	480.246	8.11						1.39524	2.7917
5.87_801.4720m/z	801.472	5.87						1.12567	2.81642
1.42_335.0498m/z	335.05	1.42						1.3221	2.85255
0.75_402.0060m/z	402.006	0.75						1.85823	2.9911
6.78_832.8623m/z	832.862	6.78						1.29697	3.26246
5.28_708.4419m/z	708.442	5.28						1.12043	3.74824
0.77_301.0648m/z	301.065	0.77						2.01201	6.09134
6.88_390.1331m/z	390.133	6.88						2.73225	9.28558
0.95_329.0096m/z	329.01	0.95						2.02598	9.43581
0.95_659.0281m/z	659.028	0.95						5.07986	12.3628
2.42_356.1317m/z	356.132	2.42						1.15818		-6.08166e-09
0.98_506.5312m/z	506.531	0.98						1.10364		3.74448e-08
6.91_626.6416m/z	626.642	6.91						1.27479	0.225886	0.0884756
6.91_626.9761m/z	626.976	6.91						1.15411	0.265788	0.110917
6.04_603.7532m/z	603.753	6.04						1.33181	0.262064	0.133851
5.21_845.4897m/z	845.49	5.21						1.53738		0.138765
5.56_630.2021m/z	630.202	5.56						1.46251	0.116481	0.167029
6.93_623.7877m/z	623.788	6.93						2.41686	0.431006	0.186407
6.93_623.2859m/z	623.286	6.93						3.34743	0.43481	0.186904
6.04_603.2521m/z	603.252	6.04						1.85786	0.312518	0.192838
6.69_832.4475m/z	832.447	6.69						1.77451		0.209395
5.26_653.3633m/z	653.363	5.26						2.7012		0.223102
6.70_950.9883m/z	950.988	6.7						1.70821		0.239261
6.56_650.3534m/z	650.353	6.56						2.43466	0.415398	0.246377
6.04_889.4432m/z	889.443	6.04						1.61069		0.278435
6.01_582.1910m/z	582.191	6.01						1.29546	0.435204	0.352464
0.96_114.0559m/z	114.056	0.96						1.44226		0.423007
10.29_629.3387m/z	629.339	10.29						1.27849	0.212932	0.497519
0.75_364.0258m/z	364.026	0.75						1.31583		0.523156
6.11_330.2027m/z	330.203	6.11						1.91312		1.65538
6.04_411.1260m/z	411.126	6.04						3.44617	2.33759	1.705
6.28_272.0893m/z	272.089	6.28						1.0393		2.21172
0.77_88.0403m/z	88.0403	0.77						1.38255	3.14559	2.49509
0.98_78.9588m/z	78.9588	0.98						1.94213		3.06989
9.81_835.5338m/z	835.534	9.81						4.01906		3.93074
7.25_329.0931m/z	329.093	7.25						1.77855		4.23469
9.40_192.0484m/z	192.048	9.4						1.32506	3.63045	4.36244
11.45_564.3305m/z	564.331	11.45						2.80816		4.99005
7.91_573.2705m/z	573.27	7.91						1.59275	2.56448	5.63304
7.93_419.1365m/z	419.137	7.93						1.89178		5.71197
7.15_418.1638m/z	418.164	7.15						1.29059	4.8899	8.09119
7.14_703.2110m/z	703.211	7.14						2.15909		8.97853
0.98_392.9019m/z	392.902	0.98						3.78628	7.15849	9.67474
8.32_267.0903m/z	267.09	8.32						1.06809		17.1215
5.89_562.0419m/z	562.042	5.89						2.21552		195.557
8.72_285.0765m/z	285.077	8.72						5.1041		1865.8
6.78_656.1704m/z	656.17	6.78						1.56903		36.027	-9.14583e+08
5.77_197.5680m/z	197.568	5.77						1.12109		-3.90186e+08	-9.41207e+07
16.27_557.2867m/z	557.287	16.27						1.28847		218.918	-4.84847e+07
5.49_323.0731m/z	323.073	5.49						2.02925		-1.71597e+07	-1.71062e+07
2.48_475.1687m/z	475.169	2.48						1.67411	4.15675	-1.98325e-08	-2.55773e-09
2.66_254.6984m/z	254.698	2.66						1.36664	7.69815		1.05551e-08
2.48_433.1927m/z	433.193	2.48						1.34922		0.000781087	0.000514313
2.48_437.2116m/z	437.212	2.48						1.87923		0.00943485	0.00757184
2.53_686.0994m/z	686.099	2.53						2.10501		0.0118217	0.0151379
2.48_240.0848m/z	240.085	2.48						1.58889		0.0432867	0.0359809
2.54_331.5552m/z	331.555	2.54						2.83743		0.0324756	0.0413785
2.54_529.0622m/z	529.062	2.54						2.66297		0.0363428	0.0466142
2.66_129.0554m/z	129.055	2.66						1.8021		0.0261177	0.053224
2.45_459.1948m/z	459.195	2.45						3.9468		0.0757017	0.0574977
2.91_76.9698m/z	76.9698	2.91						1.1839		0.0830646	0.0740462
5.26_555.3137m/z	555.314	5.26						1.22138		0.0568005	0.0815919
5.28_507.2649m/z	507.265	5.28						1.11517		0.143437	0.10101
6.72_482.8826m/z	482.883	6.72						1.02827	3.75856		0.116694
6.72_482.5480m/z	482.548	6.72						1.18305	3.56401		0.117001
2.60_540.0534m/z	540.053	2.6						4.56741		0.110328	0.121865
6.72_724.8282m/z	724.828	6.72						2.02438	3.117		0.150545
7.12_972.4473m/z	972.447	7.12						1.06425		0.136629	0.155269
6.72_724.3270m/z	724.327	6.72						2.59498	2.921		0.15952
7.12_485.7194m/z	485.719	7.12						1.19911		0.1707	0.163656
7.05_698.2545m/z	698.255	7.05						1.23759	6.37578		0.185376
5.53_985.5003m/z	985.5	5.53						1.13056	0.314749	0.0622872	0.203396
5.21_671.3748m/z	671.375	5.21						3.41073		0.253101	0.203537
5.24_823.4697m/z	823.47	5.24						1.74426	0.47333	0.0998038	0.218774
6.07_662.2855m/z	662.285	6.07						1.27395		0.218805	0.220206
6.14_662.3313m/z	662.331	6.14						1.52109		0.259848	0.224024
6.88_645.3276m/z	645.328	6.88						2.78606		0.236547	0.231422
6.56_650.8547m/z	650.855	6.56						1.69492	0.460252	0.116454	0.248021
5.34_684.8477m/z	684.848	5.34						1.16848		0.315337	0.249393
5.34_684.3460m/z	684.346	5.34						1.8711			0.254136
5.54_754.8867m/z	754.887	5.54						3.8634		0.273797	0.25916
5.67_687.3838m/z	687.384	5.67						1.74539	0.589614	0.162996	0.275423
6.07_661.7830m/z	661.783	6.07						1.46431		0.297057	0.288273
6.89_781.3499m/z	781.35	6.89						6.1655			0.296207
6.89_781.8504m/z	781.85	6.89						4.59733			0.308583
5.36_420.2344m/z	420.234	5.36						2.17775			0.334575
6.07_651.2960m/z	651.296	6.07						3.80191			0.338927
7.90_656.2858m/z	656.286	7.9						1.25899	2.0163		0.353824
5.13_548.2573m/z	548.257	5.13						2.04464	1.67543		0.360043
8.04_776.4209m/z	776.421	8.04						2.02021	2.50195		0.376067
7.90_985.4338m/z	985.434	7.9						1.70687	1.98052		0.381119
7.90_984.9320m/z	984.932	7.9						1.9257	1.9787		0.381728
7.75_336.1015m/z	336.101	7.75						1.34909	2.6657		0.394709
5.97_850.3698m/z	850.37	5.97						1.46328		0.356126	0.428158
5.83_297.0657m/z	297.066	5.83						1.12676	4.39825		0.452619
7.15_926.9286m/z	926.929	7.15						1.36168		0.452412	0.453522
7.15_617.2820m/z	617.282	7.15						1.22127		0.42276	0.476907
5.31_564.2827m/z	564.283	5.31						1.22918			0.515718
7.22_391.2075m/z	391.207	7.22						1.65104	1.59844		0.57491
7.68_405.2231m/z	405.223	7.68						1.39569			0.583432
17.80_797.5332m/z	797.533	17.8						2.06074	6.35883		0.625218
6.35_393.1869m/z	393.187	6.35						1.10852			0.633506
6.01_420.1975m/z	420.197	6.01						1.52812	1.63787		0.638582
6.04_595.1431m/z	595.143	6.04						1.23402			0.656881
0.87_215.0327m/z	215.033	0.87						1.48012		1.5559	1.59019
6.88_478.1854m/z	478.185	6.88						2.31623	1.68158	2.98324	1.77451
13.34_250.1450m/z	250.145	13.34						1.22226		2.69275	1.81466
10.43_236.1053m/z	236.105	10.43						1.08792		2.94559	2.14868
0.98_290.9670m/z	290.967	0.98						1.515		4.45802	2.16643
17.02_473.2820m/z	473.282	17.02						5.08996		1.86107	2.3484
6.94_653.2170m/z	653.217	6.94						1.25216		22.7023	2.4789
12.05_530.3008m/z	530.301	12.05						1.62866	0.51741		2.49956
7.90_329.1898m/z	329.19	7.9						1.70615	2.29169	6.01269	2.63249
7.66_458.1590m/z	458.159	7.66						1.06442	8.32935	23.5116	2.81945
10.89_502.2694m/z	502.269	10.89						1.07113	0.423172		3.8098
9.81_861.5504m/z	861.55	9.81						8.97731		4.61851	4.09392
12.37_536.2076m/z	536.208	12.37						1.57558			4.39087
12.73_550.3502m/z	550.35	12.73						1.67254			4.7564
11.23_528.2852m/z	528.285	11.23						1.70576			5.29496
7.23_373.0830m/z	373.083	7.23						2.57732		8.65193	5.32196
12.64_562.2232m/z	562.223	12.64						1.25053			5.41917
7.02_435.0530m/z	435.053	7.02						1.70338		9.55755	6.05007
13.34_558.3324m/z	558.332	13.34						1.13527	0.211688		6.09245
6.83_338.0475m/z	338.048	6.83						1.31488		6.93517	7.04135
7.59_681.2027m/z	681.203	7.59						1.75743		10.0021	7.58512
13.34_568.3621m/z	568.362	13.34						3.18462	0.275767		7.68659
8.22_516.2008m/z	516.201	8.22						1.38055		11.1329	7.7615
6.07_605.2251m/z	605.225	6.07						2.61461		8.87853	7.81347
12.36_915.5857m/z	915.586	12.36						1.49399			8.43544
13.29_580.2345m/z	580.235	13.29						1.68352		3.89764	8.49064
12.73_592.3612m/z	592.361	12.73						1.26731		5.31123	8.59304
11.23_479.2958m/z	479.296	11.23						1.20237		3.93123	8.67583
11.64_564.3307m/z	564.331	11.64						5.59685	0.334947		8.81986
12.46_554.3456m/z	554.346	12.46						1.21882		3.14111	8.87488
11.67_588.3308m/z	588.331	11.67						4.40647		7.51655	11.7949
12.02_947.6117m/z	947.612	12.02						1.42691		4.52227	12.7858
12.09_590.3461m/z	590.346	12.09						1.87942		6.24854	12.8039
8.15_500.2061m/z	500.206	8.15						1.11678		9.21161	13.0855
11.05_562.3144m/z	562.314	11.05						2.50223		4.19832	14.5144
11.09_586.3150m/z	586.315	11.09						4.49148		12.4468	18.8429
5.44_586.2481m/z	586.248	5.44						1.88377		46.2289	24.1493
15.91_555.2723m/z	555.272	15.91						2.83033		15.1024	24.4477
10.95_536.2985m/z	536.298	10.95						1.37169	0.422159	9.7731	25.5945
13.29_961.6273m/z	961.627	13.29						1.24276		8.91174	32.0322
5.94_344.1818m/z	344.182	5.94						2.35059		27.3588	33.0111
5.87_561.5408m/z	561.541	5.87						5.19654		113.168	48.3601
6.06_129.0554m/z	129.055	6.06						1.83865		76.5745	64.6363
5.60_390.1329m/z	390.133	5.6						1.66512		366.729	72.8642
5.56_721.2812m/z	721.281	5.56						2.01773		51.1103	87.9238
6.07_302.1087m/z	302.109	6.07						1.83121		37.4419	131.402
5.77_220.0646m/z	220.065	5.77						1.13872		109.075	208.778
5.06_540.0537m/z	540.054	5.06						13.3132		306.832	281.216
6.56_638.1595m/z	638.159	6.56						2.32609		6.07491e+07	1.55058e+07
5.11_318.0276m/z	318.028	5.11						1.22098		-1.47063e+07	1.75793e+07
6.32_351.0684m/z	351.068	6.32						4.76625		9807.31	2.7143e+07
7.69_759.1798m/z	759.18	7.69						3.40604		1.37424e+07	3.09125e+07
5.78_219.5630m/z	219.563	5.78						2.05936		8.7766e+08	8.64624e+08
0.90_353.5068m/z	353.507	0.9						1.47604	-8.38887e+07	-6.53244e+07
6.51_482.6171m/z	482.617	6.51						1.32032	0.00830393	0.0017043
15.70_348.2871m/z	348.287	15.7						1.45908	0.171057	0.0191432
13.57_513.3187m/z	513.319	13.57						1.46474	0.0309877	0.0298473
5.54_470.1779m/z	470.178	5.54						1.05971	0.0465981	0.0335572
5.92_758.8728m/z	758.873	5.92						1.23663	0.0765762	0.0394183
13.57_523.3478m/z	523.348	13.57						1.69741	0.0336347	0.0414206
7.74_838.9155m/z	838.915	7.74						1.15239	0.165383	0.0561352
12.66_685.4019m/z	685.402	12.66						1.94829	0.0813772	0.0807272
12.94_711.4174m/z	711.417	12.94						1.21642	0.0533111	0.110999
5.33_533.1864m/z	533.186	5.33						9.21919	0.111481	0.124625
7.06_676.3363m/z	676.336	7.06						1.11046	0.421282	0.130665
6.34_571.3441m/z	571.344	6.34						2.74068	0.288713	0.131883
7.37_812.0318m/z	812.032	7.37						1.85467	0.249416	0.137252
0.98_220.0823m/z	220.082	0.98						1.31732	0.19849	0.140495
7.37_812.7000m/z	812.7	7.37						1.44824	0.260681	0.142263
6.91_940.4664m/z	940.466	6.91						3.36973	0.320649	0.151554
7.37_812.3661m/z	812.366	7.37						1.7546	0.318043	0.151816
6.91_940.9681m/z	940.968	6.91						2.93771	0.320848	0.154466
5.48_681.2853m/z	681.285	5.48						1.19413	0.210461	0.157986
5.23_727.4123m/z	727.412	5.23						1.10049	0.331801	0.16245
5.73_749.4193m/z	749.419	5.73						1.72648	0.432282	0.177557
6.02_985.4337m/z	985.434	6.02						1.21546	0.25156	0.190669
5.67_467.2125m/z	467.212	5.67						1.01013	0.579131	0.192859
5.80_531.2764m/z	531.276	5.8						1.32117	0.199199	0.193244
7.74_443.2497m/z	443.25	7.74						1.19984	0.406207	0.217256
6.70_950.4865m/z	950.486	6.7						2.04814	0.581166	0.234907
7.08_705.8858m/z	705.886	7.08						1.81124	0.399378	0.247925
7.08_706.3867m/z	706.387	7.08						1.37108	0.445806	0.265345
6.94_800.4367m/z	800.437	6.94						1.35603	0.415397	0.275492
6.94_799.9354m/z	799.935	6.94						1.60083	0.411192	0.281071
5.99_853.8855m/z	853.885	5.99						1.7071	0.471447	0.29481
5.99_854.3868m/z	854.387	5.99						1.49933	0.465141	0.295764
6.23_952.4684m/z	952.468	6.23						1.62323	0.376326	0.303566
5.67_935.4395m/z	935.439	5.67						1.71785	0.509131	0.315831
5.33_312.0946m/z	312.095	5.33						8.95607	0.302307	0.32438
0.98_256.0588m/z	256.059	0.98						1.32197	0.217255	0.342861
5.39_302.0655m/z	302.065	5.39						2.9351	0.370524	0.3515
7.47_945.9338m/z	945.934	7.47						1.09679	0.301221	0.357777
5.31_304.0613m/z	304.061	5.31						2.77448	0.312018	0.366473
5.41_692.3294m/z	692.329	5.41						1.14871	0.581454	0.370118
5.72_962.8003m/z	962.8	5.72						1.40025	0.399609	0.449286
5.72_963.1347m/z	963.135	5.72						1.40619	0.418741	0.475603
5.83_428.2506m/z	428.251	5.83						1.73032	1.54349	1.55995
7.66_434.1594m/z	434.159	7.66						3.71344	2.14129	1.8551
5.56_357.2132m/z	357.213	5.56						1.98444	2.86439	2.22783
5.46_726.3797m/z	726.38	5.46						1.84808	1.64267	2.28065
8.11_460.1748m/z	460.175	8.11						1.94554	3.38117	7.9452
0.77_287.0492m/z	287.049	0.77						1.61057	23.0061	14.8434
0.98_263.9762m/z	263.976	0.98						1.25101	14.2031	31.8001
0.98_263.4755m/z	263.476	0.98						3.09563	21.5482	34.8516
16.41_719.4866m/z	719.487	16.41						2.30407	63.5022	71.2855

## Sheet: HILIC-POS
Table S3. The key information of 401 differential metabolite features obtained by HILIC-POS analysis mode
Metabolic feature	m/z	RT(min)	Metabolite name	Metabolite ID	Formula	Score	Mass Error(ppm)	VIP	FC(16/DMSO)	FC(32/DMSO)	FC(32/16)
0.75_385.2732m/z	385.273	0.75	Persicachrome	HMDB0036425	C25H36O3	40	-1.30247	1.40951		5.26012	4.21516
0.86_782.5691m/z	782.569	0.86	PC(16:0/20:4(5Z,8Z,11Z,14Z))	HMDB0007982	C44H80NO8P	40	-0.42269	6.34204		3.71014	3.80211
0.85_856.5821m/z	856.582	0.85	PC(20:4(5Z,8Z,11Z,14Z)/22:5(4Z,7Z,10Z,13Z,16Z))	HMDB0008450	C50H82NO8P	40.1	-3.5254	2.07907		5.76023	3.52725
0.85_832.5843m/z	832.584	0.85	PC(18:1(11Z)/22:6(4Z,7Z,10Z,13Z,16Z,19Z))	HMDB0008090	C48H82NO8P	40.2	-0.890072	2.51004		2.06028	2.06205
0.73_279.1583m/z	279.158	0.73	2-[(3,3-dimethyloxiran-2-yl)methyl]-4-(3-methylbut-2-en-1-yl)benzene-1,3,5-triol	HMDB0133048	C16H22O4	40.2	-2.97877	1.52887	0.406221
0.85_834.5990m/z	834.599	0.85	PC(18:0/22:6(4Z,7Z,10Z,13Z,16Z,19Z))	HMDB0008057	C48H84NO8P	40.5	-2.10354	3.64877		3.17252	2.7368
11.88_262.0493m/z	262.049	11.88	O-Phosphotyrosine	HMDB0006049	C9H12NO6P	40.7	7.05766	1.15015	1.91141	2.18124
1.20_480.3428m/z	480.343	1.2	LysoPC(P-16:0)	HMDB0010407	C24H50NO6P	40.8	-4.29349	1.12745	0.384487
6.90_740.5536m/z	740.554	6.9	PC(P-16:0/18:3(6Z,9Z,12Z))	HMDB0011212	C42H78NO7P	40.9	-7.16549	1.27225		0.0853277
6.30_740.5537m/z	740.554	6.3	PC(P-16:0/18:3(6Z,9Z,12Z))	HMDB0011212	C42H78NO7P	40.9	-7.04004	2.13869		0.0955227
11.05_405.0083m/z	405.008	11.05	Uridine5'-diphosphate	HMDB0000295	C9H14N2O12P2	41.1	-2.89187	1.25172	0.445359	0.304397
0.88_758.5697m/z	758.57	0.88	PC(18:2(9Z,12Z)/16:0)	HMDB0008133	C42H80NO8P	41.2	0.382471	7.50902		1.83172	1.80956
0.89_706.5385m/z	706.538	0.89	PC(14:0/16:0)	HMDB0007869	C38H76NO8P	41.8	0.480332	3.56509		2.03369
12.89_405.0093m/z	405.009	12.89	Uridine5'-diphosphate	HMDB0000295	C9H14N2O12P2	41.8	-0.332742	2.8229	2.44511
7.80_296.0649m/z	296.065	7.8	5-Aminoimidazoleribonucleotide	HMDB0001235	C8H14N3O7P	42.1	2.22185	1.03718	2.22105	3.75692	1.70292
8.17_292.1024m/z	292.102	8.17	Toyocamycin	96312	C12H13N5O4	42.2	-5.75128	1.90362		0.457881	0.609091
6.28_766.5665m/z	766.567	6.28	2-O-(5,8,11,14,17-Eicosapentaenoyl)-1-O-hexadecylglycero-3-phosphocholine	HMDB0039528	C44H80NO7P	42.3	-10.4922	2.04443		0.113164
8.11_365.1055m/z	365.106	8.11	Ser-His-OH	65203	C15H16N4O7	42.6	-10.2135	4.84985		1.95791	1.67419
6.95_768.5829m/z	768.583	6.95	PC(o-16:0/20:4(8Z,11Z,14Z,17Z))	HMDB0013407	C44H82NO7P	42.7	-9.40695	2.21162		0.105269
10.41_379.1281m/z	379.128	10.41	AspAsnMet	19688	C13H22N4O7S	43	-0.148329	5.81496		1.80408
0.73_391.2839m/z	391.284	0.73	D8'-MerulinicacidA	HMDB0041454	C24H38O4	43.2	-1.04421	4.37191	0.469439
0.73_884.5416m/z	884.542	0.73	PS(22:4(7Z,10Z,13Z,16Z)/22:6(4Z,7Z,10Z,13Z,16Z,19Z))	HMDB0116782	C50H78NO10P	43.6	-2.27258	2.75874		26.7842	12.9574
13.57_876.4303m/z	876.43	13.57	Gliadorphin	HMDB0059786	C43H57N9O11	43.9	5.98149	2.57276		0.184655	0.222642
7.49_130.0498m/z	130.05	7.49	Pyroglutamicacid	HMDB0000267	C5H7NO3	44.1	-0.776318	3.37826	1.52542	1.55114
0.89_703.5732m/z	703.573	0.89	SM(d18:0/16:1(9Z))	HMDB0013464	C39H79N2O6P	44.2	-2.41075	5.70413		2.32777	2.16776
13.63_404.0240m/z	404.024	13.63	CDP	HMDB0001546	C9H15N3O11P2	44.3	-3.65401	1.21992	1.98918
14.34_483.9909m/z	483.991	14.34	Cytidinetriphosphate	HMDB0000082	C9H16N3O14P3	44.4	-1.91564	1.83829	3.3839	2.79408
7.20_247.0577m/z	247.058	7.2	CoriandroneC	HMDB0041525	C13H10O5	44.6	-9.73988	1.48347		0.550359
7.80_537.1934m/z	537.193	7.8	8-Hydroxypinoresinol4-glucoside	HMDB0033282	C26H32O12	44.8	-6.10541	2.98627		1.6756
6.90_808.5812m/z	808.581	6.9	PC(18:1(11Z)/20:4(8Z,11Z,14Z,17Z))	HMDB0008082	C46H82NO8P	44.9	-4.829	3.22153		0.133853
6.97_766.5680m/z	766.568	6.97	2-O-(5,8,11,14,17-Eicosapentaenoyl)-1-O-hexadecylglycero-3-phosphocholine	HMDB0039528	C44H80NO7P	45.3	-8.47887	1.36774		0.122741
1.22_570.3534m/z	570.353	1.22	LysoPC(22:5(4Z,7Z,10Z,13Z,16Z))	HMDB0010402	C30H52NO7P	45.5	-3.57222	1.31926		4.75455	5.438
11.35_491.2092m/z	491.209	11.35	Cymorcindiglucoside	HMDB0039386	C18H30N6O10	45.6	-0.807633	2.48925		0.459848	0.510445
6.22_754.5349m/z	754.535	6.22	PC(14:0/20:4(5Z,8Z,11Z,14Z))	HMDB0007883	C42H76NO8P	45.6	-4.34037	2.64075		0.196916
0.81_840.5681m/z	840.568	0.81	PS(22:0/18:4(6Z,9Z,12Z,15Z))	HMDB0112718	C46H82NO10P	45.9	-8.07238	3.02081		3.27934
11.06_204.0862m/z	204.086	11.06	N-acetyl-L-2-aminoadipate(2-)	HMDB0062715	C8H13NO5	46.3	-2.07086	2.27036	0.446885	0.288441	0.645466
1.22_568.3374m/z	568.337	1.22	LysoPC(22:6(4Z,7Z,10Z,13Z,16Z,19Z))	HMDB0010404	C30H50NO7P	46.4	-4.16156	1.08951		3.7231	4.54852
9.61_203.1498m/z	203.15	9.61	Symmetricdimethylarginine	HMDB0003334	C8H18N4O2	46.4	-2.04317	2.31972		0.549265
8.08_361.2062m/z	361.206	8.08	GlnThrIle	18797	C15H28N4O6	46.4	-5.35533	1.20147	0.341766	0.170875
0.85_816.5916m/z	816.592	0.85	PC(22:6(4Z,7Z,10Z,13Z,16Z,19Z)/P-18:1(11Z))	HMDB0008753	C48H82NO7P	46.7	1.80052	1.70783	0.593543
0.89_724.5252m/z	724.525	0.89	PE(P-16:0/20:4(8Z,11Z,14Z,17Z))	HMDB0011353	C41H74NO7P	46.9	-3.3024	2.8		2.43826	2.93306
6.90_754.5345m/z	754.534	6.9	PC(14:0/20:4(5Z,8Z,11Z,14Z))	HMDB0007883	C42H76NO8P	47	-4.77377	1.3669		0.169542
11.11_293.0972m/z	293.097	11.11	EdeticAcid	HMDB0015109	C10H16N2O8	47.1	-2.54347	1.50494	0.287951	0.236838
10.94_357.2487m/z	357.249	10.94	IleProLys	16048	C17H32N4O4	47.1	-2.56042	1.06754	1.67672
14.39_523.9968m/z	523.997	14.39	Guanosinetriphosphate	HMDB0001273	C10H16N5O14P3	47.2	-2.2576	1.80935	1.77836
0.89_496.3382m/z	496.338	0.89	LysoPC(0:0/16:0)	HMDB0240262	C24H50NO7P	47.4	-3.12574	2.50117			2.08684
4.76_204.1229m/z	204.123	4.76	L-Acetylcarnitine	HMDB0000201	C9H17NO4	47.8	-0.604552	4.46851	0.451718	0.191817
10.67_276.1181m/z	276.118	10.67	Glutamylglutamine	HMDB0028817	C10H17N3O6	48	-3.41973	0.981707	0.440043		1.8845
8.11_110.0705m/z	110.07	8.11	4-PyrimidineMethanamine(hydrochloride)	45035	C5H7N3	48	-7.19939	1.47348		2.01445
12.18_291.1296m/z	291.13	12.18	Argininosuccinicacid	HMDB0000052	C10H18N4O6	48.1	-1.00615	2.16345	1.95753		0.470084
1.22_524.3667m/z	524.367	1.22	LysoPC(18:0)	HMDB0010384	C26H54NO7P	48.1	-8.35048	2.51989	0.364543
11.80_305.0967m/z	305.097	11.8	N-Acetylaspartylglutamicacid	HMDB0001067	C11H16N2O8	48.2	-3.97934	0.975753		0.390504	0.494798
3.69_335.1056m/z	335.106	3.69	PenicillinG	HMDB0015186	C16H18N2O4S	48.8	-1.17168	3.65581		2.80133
2.42_137.0447m/z	137.045	2.42	Allopurinol	HMDB0014581	C5H4N4O	48.9	-8.15619	1.38318	0.630351	0.0898476	0.142645
1.15_426.3561m/z	426.356	1.15	Oleoylcarnitine	HMDB0005065	C25H47NO4	48.9	-4.04265	1.22225	0.109728	0.0231258	0.213071
8.63_361.1821m/z	361.182	8.63	GlyGluArg	21169	C13H24N6O6	48.9	-2.51613	1.16288	0.547636	0.406847
1.34_468.3072m/z	468.307	1.34	LysoPC(14:0/0:0)	HMDB0010379	C22H46NO7P	49	-2.69828	1.45566			2.69693
8.32_216.0630m/z	216.063	8.32	sn-glycero-3-Phosphoethanolamine	HMDB0059660	C5H14NO6P	49.3	-0.842178	1.62098		0.476413	0.598393
1.96_260.1850m/z	260.185	1.96	L-Hexanoylcarnitine	HMDB0000756	C13H25NO4	49.3	-2.30588	1.68731		0.249602	0.280385
3.02_188.0704m/z	188.07	3.02	Indoleacrylicacid	HMDB0000734	C11H9NO2	49.3	-1.24512	3.74538	1.53264
1.25_542.3221m/z	542.322	1.25	LysoPC(20:5(5Z,8Z,11Z,14Z,17Z))	HMDB0010397	C25H43N5O8	49.4	6.82172	1.56724		9.79326	7.28884
3.78_137.0705m/z	137.071	3.78	2-Methylnicotinamide	HMDB0059711	C7H8N2O	49.6	-3.20121	3.8417	7.19868	12.7276	1.77348
0.81_313.0706m/z	313.071	0.81	AflatoxinB1	HMDB0006552	C17H12O6	49.6	-0.324674	2.92292	-1.96038e+08	-1.48496e+08
2.89_232.1545m/z	232.155	2.89	Butyrylcarnitine	HMDB0002013	C11H21NO4	49.8	0.611205	6.4969		0.415409	0.417627
4.76_116.0703m/z	116.07	4.76	D-Proline	HMDB0003411	C5H9NO2	50.2	-2.97711	2.48377		0.624319	0.601479
1.23_544.3373m/z	544.337	1.23	LysoPC(20:4(5Z,8Z,11Z,14Z))	HMDB0010395	C28H50NO7P	50.3	-4.59036	2.51982		4.42659	5.80147
2.47_104.1068m/z	104.107	2.47	Choline	56	C5H13NO	50.4	-1.88741	3.55819		1.50613
10.77_170.0565m/z	170.056	10.77	Phosphodimethylethanolamine	HMDB0060244	C4H12NO4P	50.5	-6.99882	1.18961	4.08191	4.08011
10.80_560.0770m/z	560.077	10.8	Adenosinediphosphateribose	HMDB0001178	C15H23N5O14P2	50.7	-3.51403	1.2744		14.1252	8.00518
2.40_246.1699m/z	246.17	2.4	2-Methylbutyroylcarnitine	HMDB0000378	C12H23NO4	50.7	-0.366295	5.82081		0.407641	0.301025
7.70_160.1330m/z	160.133	7.7	METHACHOLINE	43545	C8H17NO2	50.7	-1.40946	3.3686	0.557812	0.200576	0.35968
11.00_364.0642m/z	364.064	11	Guanosinemonophosphate	HMDB0001397	C10H14N5O8P	50.9	-3.07323	1.09326		2.56781	3.54711
8.29_112.9989m/z	112.999	8.29	Methylphosphate	HMDB0061711	CH5O4P	50.9	-8.17442	1.15717	0.299657	0.221586
11.51_615.1532m/z	615.153	11.51	CytidinemonophosphateN-acetylneuraminicacid	HMDB0001176	C20H31N4O16P	51	-2.17199	1.70436	0.378004	0.229466	0.607114
0.75_838.5577m/z	838.558	0.75	PE(DiMe(11,3)/MonoMe(11,5))	HMDB0061477	C46H80NO10P	51.1	-1.8157	2.04797		2.56061	2.4854
9.98_666.1316m/z	666.132	9.98	NADH	HMDB0001487	C21H29N7O14P2	51.1	-0.641981	4.85713			0.280462
7.55_146.1171m/z	146.117	7.55	3-Dehydroxycarnitine	HMDB0006831	C7H15NO2	51.2	-2.89071	1.87438	0.570138	0.327861	0.575156
8.24_342.1381m/z	342.138	8.24	6-(alpha-D-Glucosaminyl)-1D-myo-inositol	HMDB0011668	C13H19N5O6	51.2	-8.00026	1.25298		0.577033
1.26_520.3376m/z	520.338	1.26	LysoPC(18:2(9Z,12Z))	HMDB0010386	C26H50NO7P	51.5	-4.26353	3.02439			5.31468
1.83_268.1041m/z	268.104	1.83	Adenosine	HMDB0000050	C10H13N5O4	51.5	0.447878	7.07578	0.140165	0.13124
1.19_372.3096m/z	372.31	1.19	(±)-Myristoylcarnitine	85175	C21H41NO4	51.5	-3.34026	1.52414	0.243963	0.0208393	0.086552
8.17_310.1130m/z	310.113	8.17	N-Acetylneuraminicacid	HMDB0000230	C11H19NO9	51.7	-0.7138	2.16285		0.458016	0.608201
11.06_608.0886m/z	608.089	11.06	UDP-N-acetyl-D-mannosamine	HMDB0013112	C17H27N3O17P2	51.7	-0.357496	8.23834	0.474214	0.330359
3.38_152.0558m/z	152.056	3.38	2-Hydroxyadenine	HMDB0000403	C5H5N5O	51.7	-5.72529	1.84362	0.195991	0.15563
13.03_427.0942m/z	427.094	13.03	Cysteineglutathionedisulfide	HMDB0000656	C13H22N4O8S2	51.7	-2.31437	2.18023	0.346322
3.72_218.1385m/z	218.138	3.72	(±)-Propionylcarnitine	85176	C10H19NO4	51.7	-1.02932	4.70797	0.513876	0.10527	0.205699
6.60_288.2023m/z	288.202	6.6	Isoleucyl-Arginine	HMDB0028901	C12H25N5O3	52.4	-2.46445	2.76749		4.02947	3.20356
11.29_223.0746m/z	223.075	11.29	L-Cystathionine	HMDB0000099	C7H14N2O4S	52.4	-0.580566	3.53829		0.202695	0.280109
11.11_489.1140m/z	489.114	11.11	Citicoline	HMDB0001413	C14H26N4O11P2	52.5	-1.2893	2.43394	1.92382	1.91194
3.19_222.0961m/z	222.096	3.19	N-Acetylmannosamine	HMDB0001129	C8H15NO6	52.7	-5.03016	1.20578	0.197216	0.357297	1.82028
7.48_147.0764m/z	147.076	7.48	D-Glutamine	HMDB0003423	C5H10N2O3	52.7	-0.403601	2.37936	1.52695	1.51139
9.95_384.1147m/z	384.115	9.95	Succinyladenosine	HMDB0000912	C14H17N5O8	52.8	-0.876503	2.52778	0.399679	0.341314
0.75_401.3403m/z	401.34	0.75	25-Hydroxytachysterol3	HMDB0006722	C27H44O2	52.9	-2.87933	2.09044	0.575066
9.61_262.1502m/z	262.15	9.61	Serylarginine	HMDB0029033	C9H19N5O4	53	-2.81972	1.00758		1.53559	1.53652
1.32_502.2909m/z	502.291	1.32	LysoPE(0:0/20:4(8Z,11Z,14Z,17Z))	HMDB0011488	C32H39NO4	53	-8.56092	1.34386		4.36006	5.9706
9.51_134.0439m/z	134.044	9.51	D-Asparticacid	HMDB0006483	C4H7NO4	53.4	-6.46326	1.82452	2.52216	2.06765
13.79_508.0024m/z	508.002	13.79	Adenosinetriphosphate	HMDB0000538	C10H16N5O13P3	53.5	-1.16617	7.635	2.18882		0.529174
8.41_282.1180m/z	282.118	8.41	N-(1-Deoxy-1-fructosyl)threonine	HMDB0037843	C11H15N5O4	53.9	-5.87427	1.05721		0.567374	0.65955
8.11_156.0759m/z	156.076	8.11	L-2-Amino-3-(1-pyrazolyl)propanoicacid	HMDB0034267	C6H9N3O2	54.3	-5.54841	2.186		1.96852
11.57_184.0732m/z	184.073	11.57	Phosphocholine	3318	C5H14NO4P	54.4	-0.815472	16.84	2.39025	2.91667
3.38_284.0981m/z	284.098	3.38	Guanosine	HMDB0000133	C10H13N5O5	54.8	-2.93966	1.53784	0.181748	0.146349
9.51_88.0384m/z	88.0384	9.51	2-Aminoacrylicacid	HMDB0003609	C3H5NO2	55.4	-10.3922	1.41055	4.6484	3.40279
13.70_424.1015m/z	424.101	13.7	S-(1,2-DICARBOXYETHYL)GLUTATHIONE	44314	C14H21N3O10S	55.6	-1.35481	2.00774		0.549266	0.360861
0.73_261.1477m/z	261.148	0.73	5-methyl-5-(4-methylpent-3-en-1-yl)-3,6-dioxatricyclo[5.4.0.0Â²,â´]undeca-1(7),8,10-trien-8-ol	HMDB0134728	C16H20O3	55.7	-3.02307	1.01998	0.373189
4.65_265.1118m/z	265.112	4.65	Thiamine	229	C12H16N4OS	55.7	0.339035	3.48736		1.73346
11.99_399.1428m/z	399.143	11.99	S-Adenosylmethionine	3289	C15H22N6O5S	55.8	-4.34644	1.19799	1.60005	2.83697	1.77148
14.17_484.9758m/z	484.976	14.17	Uridinetriphosphate	HMDB0000285	C9H15N2O15P3	56	-0.0563752	3.44541	4.02792	3.17626
3.02_146.0591m/z	146.059	3.02	4-formylIndole	96392	C9H7NO	56.2	-6.71235	1.11552	1.49509
1.34_152.0698m/z	152.07	1.34	2-Amino-3-methylbenzoate	HMDB0060680	C8H9NO2	57.3	-5.18075	1.81602	1.57926
13.54_744.0816m/z	744.082	13.54	NicotinamideAdenineDinucleotidePhosphate(NADP+)	102	C21H28N7O17P3	57.7	-1.4681	1.71513	1.74949		0.556322
3.02_205.0965m/z	205.096	3.02	DL-Tryptophan	65534	C11H12N2O2	58.3	-3.32877	2.05602	1.58921
3.06_752.5539m/z	752.554	3.06						1.05956	0.18333
1.15_768.5813m/z	768.581	1.15						5.47384	0.290826
0.73_383.3290m/z	383.329	0.73						1.25231	0.324044
1.15_784.5799m/z	784.58	1.15						7.35859	0.343252
1.26_508.3712m/z	508.371	1.26						1.74204	0.4383
0.73_149.0226m/z	149.023	0.73						1.66477	0.472534
0.73_436.3410m/z	436.341	0.73						1.26495	0.633076
4.42_389.9512m/z	389.951	4.42						1.93143	1.50906
4.33_924.7523m/z	924.752	4.33						1.36087	1.51806
4.45_391.9493m/z	391.949	4.45						1.13531	1.53415
4.46_487.9275m/z	487.928	4.46						1.26479	1.55826
4.45_587.9032m/z	587.903	4.45						1.66773	1.56312
4.33_922.7541m/z	922.754	4.33						2.21445	1.57142
4.45_585.9054m/z	585.905	4.45						2.33663	1.59196
11.06_471.1806m/z	471.181	11.06						1.24359	1.59415
4.45_687.8783m/z	687.878	4.45						1.08542	1.60582
4.45_685.8806m/z	685.881	4.45						2.19421	1.63219
4.45_683.8825m/z	683.883	4.45						3.04358	1.647
4.33_826.7750m/z	826.775	4.33						1.49408	1.64868
4.45_879.8355m/z	879.836	4.45						1.35232	1.73737
4.45_977.8122m/z	977.812	4.45						1.1338	1.7866
11.58_584.0870m/z	584.087	11.58						2.04234	1.8531
11.59_405.0079m/z	405.008	11.59						2.01864	1.85583
12.89_422.0347m/z	422.035	12.89						1.56978	2.4956
9.44_330.0719m/z	330.072	9.44						1.26972	3.69232
0.81_358.1272m/z	358.127	0.81						1.14889	-5.2845e+06	-6.92529e+06
4.98_826.0087m/z	826.009	4.98						1.37758	0.0830769	0.0031085
0.80_391.3400m/z	391.34	0.8						2.31708	0.0572589	0.00322848
4.98_744.0059m/z	744.006	4.98						1.45849	0.0745104	0.00334287
4.98_662.0028m/z	662.003	4.98						1.52147	0.0881167	0.00404162
4.98_497.9966m/z	497.997	4.98						1.41682	0.0916943	0.00445261
4.93_816.0577m/z	816.058	4.93						1.1434	0.0780554	0.00451605
4.98_333.9910m/z	333.991	4.98						1.28839	0.110352	0.00574225
6.30_816.5864m/z	816.586	6.3						1.33023		0.00599
4.93_734.0544m/z	734.054	4.93						1.27903	0.0805597	0.00744985
4.93_324.0399m/z	324.04	4.93						1.61909	0.109419	0.00877244
4.93_652.0514m/z	652.051	4.93						1.36159	0.0899666	0.00900024
4.93_570.0487m/z	570.049	4.93						1.64532	0.0935763	0.00934046
4.93_160.0336m/z	160.034	4.93						1.1788	0.118905	0.0120248
4.98_579.9997m/z	580	4.98						2.00546	0.111915	0.0188714
6.95_772.6141m/z	772.614	6.95						1.43888		0.0211837
4.98_908.0121m/z	908.012	4.98						1.32625	0.104469	0.0295637
0.80_408.3665m/z	408.366	0.8						1.19076	0.0825883	0.0374937
5.53_822.5549m/z	822.555	5.53						1.13121		0.0387241
6.28_792.5853m/z	792.585	6.28						1.03099		0.0422222
11.65_665.0986m/z	665.099	11.65						1.44919	0.0658023	0.0463635
3.25_690.5402m/z	690.54	3.25						1.04872	0.138122	0.0500525
4.23_922.5318m/z	922.532	4.23						1.59336		0.0557889
0.80_413.3219m/z	413.322	0.8						1.28329	0.0718043	0.0580195
6.95_794.6006m/z	794.601	6.95						1.42323		0.0662879
6.25_786.5991m/z	786.599	6.25						2.93696		0.0672362
3.11_816.6211m/z	816.621	3.11						1.1317	0.0894976	0.0689705
3.11_821.6222m/z	821.622	3.11						1.24645	0.0592738	0.0697333
6.97_824.5552m/z	824.555	6.97						2.16691		0.0698322
5.55_880.5673m/z	880.567	5.55						1.13917		0.0720092
5.48_890.5836m/z	890.584	5.48						2.31244		0.0736382
3.08_800.6293m/z	800.629	3.08						1.61554	0.111404	0.0745737
6.95_718.5709m/z	718.571	6.95						1.6156		0.0767908
6.25_794.5987m/z	794.599	6.25						1.66323		0.0793217
6.95_744.5826m/z	744.583	6.95						1.46572		0.0867263
4.57_756.5288m/z	756.529	4.57						1.14598	0.422371	0.088187
4.57_811.5747m/z	811.575	4.57						1.40744	0.264925	0.0931781
6.28_768.5827m/z	768.583	6.28						3.15534		0.0932268
3.38_589.1709m/z	589.171	3.38						1.33551	0.04682	0.0953834
5.29_946.5692m/z	946.569	5.29						1.08536		0.0980921
6.95_742.5633m/z	742.563	6.95						1.1612		0.0981245
6.95_746.6007m/z	746.601	6.95						2.42285		0.104068
5.68_796.5415m/z	796.542	5.68						1.61791		0.104857
5.48_850.5850m/z	850.585	5.48						1.42868		0.113247
11.43_880.4034m/z	880.403	11.43						1.39886	0.189758	0.114793
5.73_824.5561m/z	824.556	5.73						2.2952		0.12043
6.28_809.5841m/z	809.584	6.28						3.44022		0.120815
4.59_832.5600m/z	832.56	4.59						1.04424	0.368087	0.130243
5.48_862.5528m/z	862.553	5.48						1.01172		0.130627
6.25_761.5874m/z	761.587	6.25						2.49777		0.133761
4.23_896.5162m/z	896.516	4.23						1.97988		0.137191
6.11_913.5677m/z	913.568	6.11						1.20103		0.138176
7.38_798.5398m/z	798.54	7.38						1.4179		0.14441
5.48_864.5684m/z	864.568	5.48						3.17345		0.1447
6.95_761.5877m/z	761.588	6.95						2.97646		0.151401
6.25_732.5523m/z	732.552	6.25						2.82713		0.151902
6.25_758.5668m/z	758.567	6.25						1.50039		0.153837
6.20_782.5657m/z	782.566	6.2						6.10837		0.154893
12.96_497.1152m/z	497.115	12.96						1.05934	0.259312	0.159824
6.28_798.5402m/z	798.54	6.28						2.80282		0.16128
6.97_798.5400m/z	798.54	6.97						2.27166		0.16262
6.95_706.5382m/z	706.538	6.95						1.12912		0.167037
6.95_758.5675m/z	758.567	6.95						1.67218		0.17607
6.22_780.5502m/z	780.55	6.22						1.67149		0.177648
3.11_764.5599m/z	764.56	3.11						1.02574	0.127649	0.178627
6.90_782.5657m/z	782.566	6.9						4.41865		0.181925
7.20_669.3655m/z	669.365	7.2						1.16542	0.287899	0.188189
4.57_824.5559m/z	824.556	4.57						3.87425		0.204045
5.73_798.5402m/z	798.54	5.73						2.6159		0.207431
1.15_770.6010m/z	770.601	1.15						5.85164	0.250395	0.210159
4.18_811.5911m/z	811.591	4.18						1.17811	0.329095	0.210184
6.95_732.5524m/z	732.552	6.95						3.85538		0.210229
6.70_799.5435m/z	799.543	6.7						1.06479		0.224182
6.95_780.5500m/z	780.55	6.95						1.289		0.224595
4.21_770.5104m/z	770.51	4.21						1.13353		0.248724
11.46_483.1192m/z	483.119	11.46						1.52883	0.24974	0.254218
4.57_798.5404m/z	798.54	4.57						4.78113		0.293596
6.23_725.5540m/z	725.554	6.23						1.25995		0.303485
1.15_744.5797m/z	744.58	1.15						8.03128	0.360966	0.303644
6.95_725.5536m/z	725.554	6.95						1.17411		0.311511
4.57_796.5248m/z	796.525	4.57						1.66032		0.317748
4.59_822.5393m/z	822.539	4.59						1.17372	0.420714	0.327317
9.37_655.3762m/z	655.376	9.37						2.97782	0.576563	0.329943
4.98_203.0518m/z	203.052	4.98						1.66864	0.606427	0.356708
6.97_756.5464m/z	756.546	6.97						1.03723		0.365078
5.28_836.5349m/z	836.535	5.28						1.47256		0.369153
0.89_692.5552m/z	692.555	0.89						1.46735		0.412494
0.75_739.5255m/z	739.525	0.75						1.07335	0.597524	0.4288
0.75_757.5348m/z	757.535	0.75						1.08931		0.441538
12.58_484.1162m/z	484.116	12.58						1.7415	0.508019	0.452931
3.40_306.0800m/z	306.08	3.4						1.12387	0.412525	0.607545
8.30_558.1787m/z	558.179	8.3						1.52528		0.65555
7.86_515.2124m/z	515.212	7.86						5.3805		0.659202
7.71_288.0747m/z	288.075	7.71						1.53534		0.661112
13.39_286.0553m/z	286.055	13.39						1.22889		0.67204
13.39_304.0661m/z	304.066	13.39						1.85658		0.673276
4.45_781.8587m/z	781.859	4.45						1.55425	1.7543	1.51229
7.49_84.0442m/z	84.0442	7.49						1.92825	1.51416	1.55306
4.45_979.8111m/z	979.811	4.45						1.18742	1.82282	1.55741
4.45_881.8339m/z	881.834	4.45						1.14761	1.77633	1.55856
5.48_344.9838m/z	344.984	5.48						1.4389		1.61528
13.87_571.5652m/z	571.565	13.87						1.0415		1.62146
4.45_783.8569m/z	783.857	4.45						1.23749	1.86602	1.6922
0.75_205.0848m/z	205.085	0.75						1.08767		1.69875
4.33_824.7769m/z	824.777	4.33						2.57509	1.91569	1.72046
11.59_567.0609m/z	567.061	11.59						1.57784	2.56235	1.73229
4.65_122.0713m/z	122.071	4.65						1.63602		1.73573
7.76_472.2864m/z	472.286	7.76						0.982434		1.77972
9.65_568.1834m/z	568.183	9.65						1.13362	2.5852	1.87177
0.89_732.5543m/z	732.554	0.89						8.01452		1.88417
17.76_338.9662m/z	338.966	17.76						1.09114		1.93882
14.17_507.9563m/z	507.956	14.17						2.18692	2.81538	1.97291
11.77_514.1089m/z	514.109	11.77						1.01376		2.05867
6.59_396.1276m/z	396.128	6.59						1.01225	1.63123	2.15
0.75_530.3462m/z	530.346	0.75						1.49981		2.19957
0.89_520.3366m/z	520.337	0.89						1.35056		2.39619
8.26_869.4560m/z	869.456	8.26						1.06713	1.79736	2.41311
14.17_604.9142m/z	604.914	14.17						1.28722	3.54148	2.41679
8.11_381.0783m/z	381.078	8.11						1.55473	1.79287	2.4422
9.51_116.0333m/z	116.033	9.51						1.08591	3.29789	2.70208
0.77_546.3448m/z	546.345	0.77						1.26102	1.5898	2.96459
14.17_502.0012m/z	502.001	14.17						1.94444	4.00322	3.12075
3.43_481.2050m/z	481.205	3.43						1.03362	2.25041	3.19172
11.02_369.2484m/z	369.248	11.02						1.69448	3.70206	3.3519
7.40_839.5125m/z	839.513	7.4						1.1043		3.49829
14.17_522.9218m/z	522.922	14.17						1.49908	3.96112	3.88285
11.57_124.9982m/z	124.998	11.57						2.67863	3.22826	4.0739
0.78_488.3568m/z	488.357	0.78						3.70716		4.19475
14.34_521.9374m/z	521.937	14.34						1.07598	3.11591	4.21102
0.77_444.3306m/z	444.331	0.77						2.60736		4.21476
0.80_713.4434m/z	713.443	0.8						1.05915	17.6751	4.77985
0.81_884.5939m/z	884.594	0.81						2.42675		4.81805
11.55_86.0947m/z	86.0947	11.55						2.59979	3.90617	4.82222
10.76_344.1680m/z	344.168	10.76						1.03506	5.36003	4.95426
11.58_750.1267m/z	750.127	11.58						2.44725	6.21376	5.11401
5.56_215.1000m/z	215.1	5.56						1.21748		5.41234
11.55_166.0612m/z	166.061	11.55						1.30508	4.23068	6.04885
3.77_254.1491m/z	254.149	3.77						1.05519	8.50859	10.5548
11.55_367.1390m/z	367.139	11.55						15.9085	8.29744	10.9272
11.52_550.2043m/z	550.204	11.52						7.84637	150.146	223.336
0.73_888.5693m/z	888.569	0.73						0.990615		-2.37139e+07	60.4562
13.57_438.7187m/z	438.719	13.57						0.991877		0.307343	0.376646
11.05_920.1420m/z	920.142	11.05						0.993246	0.194285	0.0355899	0.18321
11.06_809.0096m/z	809.01	11.06						1.00146	0.253126	0.0789299	0.312904
6.62_594.3671m/z	594.367	6.62						1.00477	32.0262	176.004	6.16368
3.41_203.0517m/z	203.052	3.41						1.00766	2.23459	5.02638	2.24374
7.70_420.1269m/z	420.127	7.7						1.01207	1.5277		0.480657
13.79_518.9869m/z	518.987	13.79						1.02733	3.12251		0.259065
11.99_611.1006m/z	611.101	11.99						1.04506	5.47053		0.0553057
1.10_530.3456m/z	530.346	1.1						1.05047		48.8547	9.44954
14.75_768.2766m/z	768.277	14.75						1.0518	2.88156	1.53788	0.534224
11.29_134.0261m/z	134.026	11.29						1.06721		0.217513	0.312586
0.75_819.5172m/z	819.517	0.75						1.07281		4.06684	6.6199
0.73_831.4962m/z	831.496	0.73						1.07508		218.071	39.6272
13.87_843.2084m/z	843.208	13.87						1.07704		2.3089	2.03941
13.79_589.9922m/z	589.992	13.79						1.08325	2.48423		0.46857
13.34_765.9036m/z	765.904	13.34						1.08697		0.654772	0.486361
6.83_407.1635m/z	407.163	6.83						1.09199		0.149501	0.185218
0.77_499.2674m/z	499.267	0.77						1.09694		2.12194	2.02672
4.94_595.2738m/z	595.274	4.94						1.10779	7.04465	27.8259	3.94544
13.81_686.3587m/z	686.359	13.81						1.11785		0.547675	0.446137
4.93_898.0590m/z	898.059	4.93						1.12793	0.089994	0.0134598	0.160388
13.78_537.9604m/z	537.96	13.78						1.13442	3.1125		0.265454
9.94_450.1269m/z	450.127	9.94						1.14891		0.479333	0.638525
14.27_158.9954m/z	158.995	14.27						1.15798		2.25265	2.00146
5.50_262.9808m/z	262.981	5.5						1.16092		1.81924	1.5772
0.77_501.2828m/z	501.283	0.77						1.16559		1.95242	2.11486
8.83_760.4053m/z	760.405	8.83						1.16843		4.16945	2.58564
11.54_798.2193m/z	798.219	11.54						1.17215	16.1491	10.1015	0.626064
6.44_394.2142m/z	394.214	6.44						1.17817		0.331379	0.354985
4.77_70.0646m/z	70.0646	4.77						1.18369		0.636773	0.621215
4.51_740.9394m/z	740.939	4.51						1.1978			0.652335
9.17_742.4067m/z	742.407	9.17						1.20237		1.75034	2.01477
0.89_494.3223m/z	494.322	0.89						1.20481		1.9144	2.08672
0.75_836.5418m/z	836.542	0.75						1.21273		10.6082	11.384
3.17_94.0641m/z	94.0641	3.17						1.21856	7.13817	0.0230246	0.00315682
0.72_658.5194m/z	658.519	0.72						1.22074		2.5127	2.10112
11.96_282.0403m/z	282.04	11.96						1.2304	2.10398	4.53632	2.15916
11.43_707.6739m/z	707.674	11.43						1.24092	0.143227	0.367011	2.65153
0.91_904.5871m/z	904.587	0.91						1.24902		6.93523	10.5382
8.33_431.1177m/z	431.118	8.33						1.26482		0.277684	0.383801
11.52_569.1793m/z	569.179	11.52						1.26643		-3.45706e+08	5.73819
5.53_421.3276m/z	421.328	5.53						1.26975		1.68675	1.51571
4.93_488.0453m/z	488.045	4.93						1.27159	0.0922426	0.00659625	0.0764429
14.17_990.9126m/z	990.913	14.17						1.27959	10.5861	5.46182	0.517503
2.84_598.3326m/z	598.333	2.84						1.28914		2.28728	1.9581
6.93_750.3742m/z	750.374	6.93						1.30323		4.22069	2.51745
4.99_635.0479m/z	635.048	4.99						1.30834	0.623115	0.173826	0.281105
6.44_263.1455m/z	263.146	6.44						1.35637		0.582197	0.577943
13.40_653.3068m/z	653.307	13.4						1.38483		0.417577	0.457922
9.36_387.6982m/z	387.698	9.36						1.42676		2.6864	2.46766
11.43_707.3400m/z	707.34	11.43						1.42939	0.129931	0.336704	2.68556
11.06_186.0751m/z	186.075	11.06						1.43193	0.386468	0.18769	0.485687
13.79_570.9971m/z	570.997	13.79						1.43888	2.58412		0.456106
8.83_759.9042m/z	759.904	8.83						1.4438		3.87157	2.45509
16.54_216.9485m/z	216.948	16.54						1.46556		2.268	1.81687
13.57_566.2717m/z	566.272	13.57						1.47739		0.546027	0.511723
0.86_804.5619m/z	804.562	0.86						1.49825		3.35898	3.15379
10.59_688.3507m/z	688.351	10.59						1.52304		0.393823	0.465222
9.15_741.9059m/z	741.906	9.15						1.56016		1.82	2.0967
0.89_722.5107m/z	722.511	0.89						1.5646		2.28793	2.45317
11.52_477.6461m/z	477.646	11.52						1.5892	1.02407e+08	4.3904e+08	5.06138
0.89_740.5248m/z	740.525	0.89						1.59168		2.82608	3.36519
0.86_778.5643m/z	778.564	0.86						1.62812		4.07143	3.78714
0.77_421.3165m/z	421.317	0.77						1.66706		2.05839	1.70508
9.36_774.3881m/z	774.388	9.36						1.72198		2.65817	2.36203
7.80_280.0916m/z	280.092	7.8						1.73011		1.75797	1.56655
0.85_837.6169m/z	837.617	0.85						1.73313		3.29278	3.1673
0.85_830.5677m/z	830.568	0.85						1.78778		4.91106	3.63491
6.55_323.2165m/z	323.216	6.55						1.79287	0.513936	0.130713	0.255089
0.77_376.2589m/z	376.259	0.77						1.79483		1.71928	1.59308
12.24_783.8627m/z	783.863	12.24						1.80496		0.518564	0.482966
0.86_742.5600m/z	742.56	0.86						1.8252	0.56818		1.76429
3.58_254.1493m/z	254.149	3.58						1.83351	-3.02252e+06	-2.82489e+07	4.62102
11.54_294.5797m/z	294.58	11.54						1.86042	-1.90449e+08	-3.32459e+08	4.1086
14.39_545.9629m/z	545.963	14.39						1.87138	1.88172		0.537629
0.72_721.5052m/z	721.505	0.72						1.93245		1.78479	2.41222
13.40_652.8058m/z	652.806	13.4						1.93342		0.409353	0.450693
0.73_867.5154m/z	867.515	0.73						1.95374		41.8907	19.0301
0.73_849.5062m/z	849.506	0.73						1.98164		33.5547	16.7527
3.64_235.1647m/z	235.165	3.64						1.98421		0.251687	0.264325
8.26_388.1804m/z	388.18	8.26						1.98716		1.59524	1.61165
8.83_748.9145m/z	748.914	8.83						2.00747		1.5146	1.50813
3.20_244.0785m/z	244.078	3.2						2.03819	0.242937		3.04379
0.85_854.5695m/z	854.569	0.85						2.10438		5.02614	3.71472
15.08_158.9956m/z	158.996	15.08						2.11154		1.76488	1.49591
14.16_523.9697m/z	523.97	14.16						2.12933	4.32414	2.53498	0.586848
6.44_525.2837m/z	525.284	6.44						2.14772		0.365587	0.38312
0.75_803.5269m/z	803.527	0.75						2.19732			2.67738
11.05_625.1139m/z	625.114	11.05						2.27138	0.445064	0.280938	0.632979
13.40_735.3512m/z	735.351	13.4						2.27705		0.576859	0.531333
0.75_821.5314m/z	821.531	0.75						2.27754		2.98236	2.95937
14.34_505.9604m/z	505.96	14.34						2.28405	3.91507	1.90628	0.48924
13.57_565.9383m/z	565.938	13.57						2.30041		0.544004	0.504754
8.17_274.0920m/z	274.092	8.17						2.33817		0.457542	0.613541
0.89_730.5400m/z	730.54	0.89						2.34015		2.21199	1.70875
12.24_783.3620m/z	783.362	12.24						2.39661		0.485656	0.459632
9.00_673.3874m/z	673.387	9						2.45043		0.331302	0.417541
13.78_545.9487m/z	545.949	13.78						2.47842	2.51436		0.365401
15.39_214.9532m/z	214.953	15.39						2.51792		2.16	1.71676
0.88_748.5299m/z	748.53	0.88						2.68554		2.14932	2.48965
11.52_733.2699m/z	733.27	11.52						2.76455	-3.63376e+07	-4.70917e+07	1.69696
13.49_757.4003m/z	757.4	13.49						2.80211		0.336512	0.367235
0.85_764.5478m/z	764.548	0.85						2.80476		1.9366	2.61428
7.86_772.3142m/z	772.314	7.86						2.85398		0.465846	0.511527
13.57_565.6039m/z	565.604	13.57						2.868		0.538773	0.49829
0.80_810.5500m/z	810.55	0.8						2.90632		3.91503	5.61595
0.72_708.5107m/z	708.511	0.72						2.9159		2.48846	2.20231
13.57_848.4030m/z	848.403	13.57						3.14855		0.465207	0.438745
0.88_756.5528m/z	756.553	0.88						3.16237		2.39037	3.05466
2.81_573.2372m/z	573.237	2.81						3.24564		3.30226	2.66003
8.11_707.2211m/z	707.221	8.11						3.27622		2.17955	1.77358
0.85_790.5746m/z	790.575	0.85						3.28388			2.13496
9.86_574.0936m/z	574.094	9.86						3.37762		25.7229	13.7179
14.17_506.9454m/z	506.945	14.17						3.57161	4.54886	2.42827	0.534748
0.86_811.6027m/z	811.603	0.86						3.78984		2.83506	3.18988
13.49_756.8995m/z	756.899	13.49						3.83321		0.311787	0.341489
0.89_735.5703m/z	735.57	0.89						3.93069		4.40634	3.48411
13.57_847.9019m/z	847.902	13.57						4.05083		0.460899	0.434094
0.86_780.5547m/z	780.555	0.86						4.28		4.46905	3.99849
0.86_806.5705m/z	806.571	0.86						4.36898		3.52134	3.03195
0.85_766.5641m/z	766.564	0.85						5.01145		1.87801	2.77586
13.79_529.9723m/z	529.972	13.79						6.16918	2.20309		0.628617
0.86_784.5841m/z	784.584	0.86						6.70638		2.06741	2.78175
0.86_808.5844m/z	808.584	0.86						7.41559		3.9785	3.50944

## Sheet: HILIC-NEG
Table S3. The key information of 319 differential metabolite features obtained by HILIC-NEG analysis mode
Metabolic feature	m/z	RT(min)	Metabolite name	Metabolite ID	Formula	Score	Mass Error(ppm)	VIP	FC(16/DMSO)	FC(32/DMSO)	FC(32/16)
0.84_227.2016m/z	227.202	0.84	Myristicacid	HMDB0000806	C14H28O2	39.9	-0.390452	1.30881	0.584952	0.615795
0.75_819.5184m/z	819.518	0.75	PG(22:6(4Z,7Z,10Z,13Z,16Z,19Z)/18:1(11Z))	HMDB0116632	C46H77O10P	39.9	0.245803	4.14445	0.438209
0.81_281.2487m/z	281.249	0.81	Oleicacid	HMDB0000207	C18H34O2	40	0.192561	3.85446	0.443215	0.5095
0.70_433.1399m/z	433.14	0.7	HoPhe-Phe-OH	65012	C24H22N2O6	40.1	-1.47934	1.58617		2.09932	1.7131
0.92_768.5500m/z	768.55	0.92	PE(18:0/20:3(5Z,8Z,11Z))	HMDB0009001	C43H80NO8P	40.1	-6.28985	1.22779		4.97183	6.63431
8.58_387.1132m/z	387.113	8.58	Sulfinpyrazonesulfide	HMDB0060943	C23H20N2O2S	40.1	-10.4319	1.80817		1.63305
11.35_563.0678m/z	563.068	11.35	dTDP-D-glucose	HMDB0001328	C16H26N2O16P2	40.3	-1.13705	4.23305	0.546318	0.459376
9.31_267.0718m/z	267.072	9.31	3-Deoxy-D-glycero-D-galacto-2-nonulosonicacid	HMDB0000425	C9H16O9	40.6	-1.22815	1.70516	0.672473	0.390951	0.580684
11.32_300.0384m/z	300.038	11.32	N-Acetylgalactosamine4-sulphate	HMDB0000781	C8H15NO9S	40.7	-3.4137	2.01706		0.277306	0.424076
0.79_309.2791m/z	309.279	0.79	OleicAcidethylester	45007	C20H38O2	41.3	-2.68913	1.21244	0.337481	0.17871
0.76_773.5341m/z	773.534	0.76	PG(18:2(9Z,12Z)/18:0)	HMDB0010647	C42H79O10P	41.3	0.400203	2.67016	0.372402	0.478235
11.73_481.1044m/z	481.104	11.73	(-)-Epigallocatechin3'-glucuronide	HMDB0041638	C21H22O13	41.4	11.6578	2.52992	0.520225	0.604424
6.64_742.5383m/z	742.538	6.64	PE(18:1(9Z)/18:1(11Z))	HMDB0009058	C41H78NO8P	41.4	-1.31399	1.40212		0.219984
2.97_619.2883m/z	619.288	2.97	1-Arachidonoylglycerophosphoinositol	HMDB0061690	C29H49O12P	41.7	-0.891472	2.19022	0.284564		6.87542
9.87_231.0621m/z	231.062	9.87	Kifunensine	45180	C8H12N2O6	42.3	-0.626684	1.88796	0.441874	0.574408
0.75_339.1986m/z	339.199	0.75	NORETHINDRONEACETATE	44171	C22H28O3	42.3	5.84731	1.23668	0.501984		3.64541
3.91_773.5342m/z	773.534	3.91	PG(18:2(9Z,12Z)/18:0)	HMDB0010647	C42H79O10P	42.4	0.544827	2.35798	0.2958	0.0619816
9.11_408.1623m/z	408.162	9.11	N-Carbamoylglucuronidelorcaserin	HMDB0061159	C21H28ClNO5	42.5	9.7653	1.1114	1.69744		0.426571
6.66_773.5333m/z	773.533	6.66	PG(18:1(11Z)/18:1(11Z))	HMDB0010618	C42H79O10P	42.5	-0.602543	1.41026		0.0439781
0.82_253.2168m/z	253.217	0.82	Palmitoleicacid	HMDB0003229	C16H30O2	43.3	-1.84564	1.15408	0.632004
0.92_738.5079m/z	738.508	0.92	PE(20:4(5Z,8Z,11Z,14Z)/16:0)	HMDB0009385	C41H74NO8P	43.4	0.000133236	1.76922		2.95278	4.67319
0.79_329.2472m/z	329.247	0.79	4,8,12,15,19-Docosapentaenoicacid	HMDB0039133	C22H34O2	43.7	-4.33117	1.45274		2.48841	2.43638
10.94_273.0378m/z	273.038	10.94	Alloathyriol	HMDB0038715	C14H10O6	43.8	-9.83073	1.76584	4.40488	3.47948
0.81_327.2322m/z	327.232	0.81	Docosahexaenoicacid	HMDB0002183	C22H32O2	43.9	-2.402	1.97078		2.41135	2.66939
9.99_433.1928m/z	433.193	9.99	1,1'-Ethylidenebistryptophan	HMDB0034899	C24H26N4O4	44	10.7772	1.32677	1.94002
10.17_784.1502m/z	784.15	10.17	FAD	HMDB0001248	C27H33N9O15P2	44	0.387929	1.08933		0.510864	0.655475
11.35_606.0756m/z	606.076	11.35	Uridinediphosphate-N-acetylglucosamine	HMDB0000290	C17H27N3O17P2	44.4	2.18271	30.6154	0.499221	0.369098
9.25_218.0671m/z	218.067	9.25	O-Succinyl-L-homoserine	362	C8H13NO6	44.5	0.312465	1.72089		0.207994	0.343377
0.79_232.1702m/z	232.17	0.79	RotundineB	HMDB0035232	C15H23NO	44.5	-2.04	1.06845		4.88249	2.73596
3.04_599.3186m/z	599.319	3.04	2-Stearoylglycerophosphoinositol	HMDB0061704	C27H53O12P	44.7	-2.57952	2.49861	0.300038		4.32999
10.26_382.0991m/z	382.099	10.26	Succinyladenosine	HMDB0000912	C14H17N5O8	44.7	-3.37291	1.45162	0.405578	0.372229
0.90_722.5135m/z	722.514	0.9	PE(20:4(8Z,11Z,14Z,17Z)/P-16:0)	HMDB0009444	C41H74NO7P	44.9	0.718487	3.55708		2.26335	3.41849
1.38_436.2819m/z	436.282	1.38	PE(P-16:0e/0:0)	HMDB0011152	C21H44NO6P	45.7	-3.34574	1.36156	0.53138
11.33_202.0713m/z	202.071	11.33	N-acetyl-L-2-aminoadipate(2-)	HMDB0062715	C8H13NO5	45.9	-3.94813	1.46972	0.0721967	0.020723
0.90_842.5916m/z	842.592	0.9	PS(22:1(13Z)/18:1(9Z))	HMDB0112743	C46H86NO10P	46.4	-0.0419972	2.58416	0.590982	2.49544	4.22502
1.17_868.6050m/z	868.605	1.17	PS(22:0/20:3(5Z,8Z,11Z))	HMDB0112722	C48H88NO10P	46.6	-2.622	1.10026		4.68714	5.9345
11.30_362.0495m/z	362.05	11.3	Guanosinemonophosphate	HMDB0001397	C10H14N5O8P	46.8	-3.38837	1.65397	0.194187		6.07583
9.91_273.0379m/z	273.038	9.91	Alloathyriol	HMDB0038715	C14H10O6	47.1	-9.19434	2.05918		0.577774	0.407575
0.78_515.2634m/z	515.263	0.78	CavipetinEisomer2	HMDB0059923	C29H40O8	47.2	-3.27044	1.20134		2.45903	2.17582
11.87_565.0487m/z	565.049	11.87	UDP-D-galactose(2-)	HMDB0062573	C15H24N2O17P2	47.4	1.76736	11.3652	1.83497		0.543723
1.41_480.3078m/z	480.308	1.41	LysoPE(18:0/0:0)	HMDB0011130	C23H48NO7P	47.5	-3.73055	1.99623	0.546486		4.29428
8.66_110.9849m/z	110.985	8.66	Methylphosphate	HMDB0061711	CH5O4P	47.6	-3.28655	2.28069	0.301521	0.22793
0.82_255.2330m/z	255.233	0.82	Palmiticacid	HMDB0000220	C16H32O2	47.8	0.0226979	4.07236	0.652865		1.69337
6.31_844.6067m/z	844.607	6.31	PS(18:0/22:1(13Z))	HMDB0112380	C46H88NO10P	47.8	-0.701264	2.13588		0.140686
12.19_588.0744m/z	588.074	12.19	GDP-L-fucose	HMDB0001095	C16H25N5O15P2	47.9	-0.891158	1.50099			0.634152
8.38_195.0509m/z	195.051	8.38	Gluconicacid	HMDB0000625	C6H12O7	47.9	-0.503166	4.69133	0.434572	0.349544
1.93_135.0318m/z	135.032	1.93	Hypoxanthine	HMDB0000157	C5H4N4O	48	4.49149	1.84854		0.325729	0.410763
0.75_205.1596m/z	205.16	0.75	2-benzylheptan-1-ol	HMDB0133179	C14H22O	48.1	-0.827277	2.79313		3.13118	3.42604
0.76_311.1678m/z	311.168	0.76	N-Undecylbenzenesulfonicacid	HMDB0032549	C17H28O3S	48.2	-2.77344	1.56275		2.1408	2.79764
8.05_166.0180m/z	166.018	8.05	N-Acetyltaurine	HMDB0240253	C4H9NO4S	48.4	0.127584	2.5301		0.443662	0.574136
6.25_790.5584m/z	790.558	6.25	PS(20:0/16:0)	HMDB0112514	C42H82NO10P	48.4	-2.49077	1.41754		0.257125
0.81_303.2325m/z	303.233	0.81	Arachidonicacid	HMDB0001043	C20H32O2	48.5	-1.64768	2.78093		2.683	3.95967
14.43_481.9758m/z	481.976	14.43	Cytidinetriphosphate	HMDB0000082	C9H16N3O14P3	48.5	-3.01706	1.70427	3.64479	2.94569
0.76_325.1831m/z	325.183	0.76	2-Dodecylbenzenesulfonicacid	HMDB0031031	C18H30O3S	48.6	-3.5908	1.60423	0.61878	1.99586	3.24292
0.89_866.5921m/z	866.592	0.89	PS(20:4(8Z,11Z,14Z,17Z)/22:0)	HMDB0112672	C48H86NO10P	48.6	0.461754	2.9356		4.91749	5.82522
2.68_252.0871m/z	252.087	2.68	N-lactoyl-Tyrosine	HMDB0062177	C12H15NO5	48.9	-2.56559	1.26897	0.480779	0.250101	0.520847
7.09_239.0768m/z	239.077	7.09	D-glycero-L-galacto-Octulose	HMDB0029954	C8H16O8	49.1	-1.6312	1.44637		0.542447
0.89_892.6056m/z	892.606	0.89	PS(22:0/22:5(7Z,10Z,13Z,16Z,19Z))	HMDB0112732	C50H88NO10P	49.1	-1.86912	1.37351		3.87126	4.23461
1.93_266.0894m/z	266.089	1.93	Adenosine	HMDB0000050	C10H13N5O4	50.1	-0.37827	4.28599	0.11875	0.129539
3.36_235.0718m/z	235.072	3.36	N'-Formylkynurenine	HMDB0001200	C11H12N2O4	50.1	-2.62349	1.12736	0.150235	0.0513471
12.95_604.0700m/z	604.07	12.95	GDP-alpha-D-mannose(2-)	HMDB0062759	C16H25N5O16P2	50.4	0.210968	1.48696			0.650424
3.67_282.0841m/z	282.084	3.67	Guanosine	HMDB0000133	C10H13N5O5	50.4	-0.906199	3.16909	0.131459	0.144363
1.35_602.3452m/z	602.345	1.35	JanthitremE	HMDB0030529	C37H49NO6	50.5	-5.89215	1.40474	0.608324	5.86039	9.53081
1.46_478.2925m/z	478.293	1.46	LysoPE(18:1(11Z)/0:0)	HMDB0011505	C23H46NO7P	50.5	-2.97	2.12669			2.81775
0.92_500.2772m/z	500.277	0.92	LysoPE(20:4(5Z,8Z,11Z,14Z)/0:0)	HMDB0011517	C25H44NO7P	50.9	-2.20988	1.33369	0.506104	3.09813	6.27616
11.15_300.0482m/z	300.048	11.15	N-acetyl-alpha-D-galactosamine1-phosphate	HMDB0059626	C8H16NO9P	51	-2.59859	2.66338	0.358436	0.250047
7.41_292.1035m/z	292.103	7.41	N-Acetylmuramate	HMDB0060493	C11H19NO8	51	-0.983673	1.04617	0.0985739	0.0142828	0.144317
3.94_844.6069m/z	844.607	3.94	PS(22:0/18:1(11Z))	HMDB0112713	C46H88NO10P	51	-0.474481	1.47522		0.210374
14.25_402.9939m/z	402.994	14.25	Uridine5'-diphosphate	HMDB0000295	C9H14N2O12P2	51	-2.44701	2.88398	3.70482	2.95884
11.81_242.0798m/z	242.08	11.81	Cytidine	HMDB0000089	C9H13N3O5	51.1	6.50128	4.67992	4.66294	5.76244
11.81_613.1405m/z	613.14	11.81	CytidinemonophosphateN-acetylneuraminicacid	HMDB0001176	C20H31N4O16P	51.3	0.819325	5.69161	0.377179	0.250696
0.92_478.2927m/z	478.293	0.92	LysoPE(18:1(11Z)/0:0)	HMDB0011505	C23H46NO7P	51.3	-2.46919	1.54917	0.391323
5.25_367.1045m/z	367.104	5.25	3-O-Caffeoyl-4-O-methylquinicacid	HMDB0039960	C17H20O9	51.4	2.86583	4.13169		3.25519	2.42663
0.90_840.5773m/z	840.577	0.9	PS(20:3(8Z,11Z,14Z)/20:0)	HMDB0112625	C46H84NO10P	51.4	1.5827	2.5285		4.53107	6.34127
7.64_195.0510m/z	195.051	7.64	Gluconicacid	HMDB0000625	C6H12O7	51.5	0.0423341	3.50909			0.594195
10.42_476.0706m/z	476.071	10.42	Chondroitin4-sulfate	HMDB0000652	C14H23NO15S	51.7	-1.98805	1.90374	4.68917	3.38886
6.28_818.5916m/z	818.592	6.28	PS(20:0/18:0)	HMDB0112516	C44H86NO10P	51.9	-0.0851644	2.6248		0.284977
12.54_275.0882m/z	275.088	12.54	gamma-Glutamylglutamicacid	HMDB0011737	C10H16N2O7	52.1	-1.16987	1.37504	2.28907	3.6272
14.25_482.9606m/z	482.961	14.25	Uridinetriphosphate	HMDB0000285	C9H15N2O15P3	52.1	-1.38926	5.91781	6.12374	3.25913	0.543199
6.84_130.0619m/z	130.062	6.84	3-Guanidinopropanoate	44712	C4H9N3O2	52.2	-2.45935	1.14576		0.503011	0.557236
1.46_498.2611m/z	498.261	1.46	LysoPE(0:0/20:5(5Z,8Z,11Z,14Z,17Z))	HMDB0011489	C25H42NO7P	52.3	-2.99481	1.08143		6.45522	7.83561
10.54_306.0498m/z	306.05	10.54	dCMP	HMDB0001202	C9H14N3O7P	52.4	0.58726	1.45235	4.77768		0.216592
13.89_422.0870m/z	422.087	13.89	S-(1,2-DICARBOXYETHYL)GLUTATHIONE	44314	C14H21N3O10S	52.4	-1.13248	3.88969	2.12207	0.551634	0.271252
5.13_360.1293m/z	360.129	5.13	De-O-methylsimmondsin	HMDB0041208	C15H23NO9	52.5	-2.07638	6.10502	1.50478	1.89119
1.26_391.2846m/z	391.285	1.26	Deoxycholicacid	265	C24H40O4	52.6	-2.03141	4.36279		5.5936
9.69_174.0410m/z	174.041	9.69	N-Acetyl-L-asparticacid	HMDB0000812	C6H9NO5	52.6	0.950496	4.38006		0.630086
7.39_230.1030m/z	230.103	7.39	Isovalerylglutamicacid	HMDB0000726	C10H17NO5	52.7	-1.71963	1.27507	4.16078	2.63141
13.27_425.0798m/z	425.08	13.27	Cysteineglutathionedisulfide	HMDB0000656	C13H22N4O8S2	52.9	-1.87296	3.31094	0.344126
11.73_189.0517m/z	189.052	11.73	Glycyl-Aspartate	HMDB0028837	C6H10N2O5	53.1	-0.142783	1.58743	2.66967	1.79459
2.66_267.0737m/z	267.074	2.66	Inosine	HMDB0000195	C10H12N4O5	53.2	0.615901	7.73972	0.426841	0.0784724	0.184074
13.58_480.9803m/z	480.98	13.58	Thymidine5'-triphosphate	HMDB0001342	C10H17N2O14P3	53.2	-3.57926	1.56828	6.53386	3.91504
13.95_505.9880m/z	505.988	13.95	Adenosinetriphosphate	HMDB0000538	C10H16N5O13P3	53.3	-0.837629	11.499	2.81587		0.479133
13.95_426.0206m/z	426.021	13.95	ADP	HMDB0001341	C10H15N5O10P2	53.3	-3.59066	3.41115	1.81409
14.46_521.9820m/z	521.982	14.46	Guanosinetriphosphate	HMDB0001273	C10H16N5O14P3	53.3	-2.68623	1.42266	1.71083
1.73_202.1084m/z	202.108	1.73	N-lactoyl-Leucine	HMDB0062176	C9H17NO4	53.5	-0.189077	1.51248			0.51143
3.64_190.0720m/z	190.072	3.64	CalystegineC1	HMDB0031346	C7H13NO5	53.7	-0.339195	2.16006	0.409236	0.0939947	0.233467
12.04_303.0833m/z	303.083	12.04	N-Acetylaspartylglutamicacid	HMDB0001067	C11H16N2O8	53.8	-0.434011	4.62972	0.647983	0.353886	0.545681
10.21_176.9357m/z	176.936	10.21	Pyrophosphate	HMDB0000250	H4O7P2	53.9	-1.14128	1.56832		0.489568	0.582796
8.67_214.0489m/z	214.049	8.67	sn-glycero-3-Phosphoethanolamine	HMDB0059660	C5H14NO6P	54	1.31561	4.11722		0.523783
3.38_147.0449m/z	147.045	3.38	Cinnamicacid	HMDB0000567	C9H8O2	54.1	-1.66396	1.85209		1.6808
9.84_132.0305m/z	132.03	9.84	L-Asparticacid	HMDB0000191	C4H7NO4	54.1	1.71844	3.45851	2.63223	2.94913
4.20_218.1036m/z	218.104	4.2	Pantothenicacid	HMDB0000210	C9H17NO5	54.1	1.07219	7.71475		0.513073	0.481002
2.68_166.0176m/z	166.018	2.68	N-Acetyltaurine	HMDB0240253	C4H9NO4S	54.3	-2.15701	1.82656	0.269066	0.111143
1.17_840.5757m/z	840.576	1.17	PS(20:0/20:3(5Z,8Z,11Z))	HMDB0112526	C46H84NO10P	54.3	-0.357175	1.97419		5.37059
8.52_308.0988m/z	308.099	8.52	N-Acetylneuraminicacid	HMDB0000230	C11H19NO9	54.4	0.469344	7.5491		0.464952	0.592933
1.26_812.5432m/z	812.543	1.26	PS(20:3(8Z,11Z,14Z)/18:0)	HMDB0012422	C44H80NO10P	54.4	-1.89965	1.15057			15.8275
0.82_285.0762m/z	285.076	0.82	Asperxanthone	HMDB0030852	C16H14O5	54.6	-2.29991	1.60462		1.23043e+08
8.16_239.0769m/z	239.077	8.16	D-glycero-L-galacto-Octulose	HMDB0029954	C8H16O8	54.7	-1.56673	1.36963	0.628216	0.565743
4.39_160.0613m/z	160.061	4.39	hydroxybutyrylglycine	HMDB0094716	C6H11NO4	54.7	-1.69058	1.22416		0.266784	0.272264
11.71_289.0325m/z	289.033	11.71	Sedoheptulose1-phosphate	HMDB0060509	C7H15O10P	54.7	-1.87288	1.38828	0.571311
11.58_221.0602m/z	221.06	11.58	L-Cystathionine	HMDB0000099	C7H14N2O4S	54.8	0.0162216	4.09709		0.284714	0.357244
3.73_179.0559m/z	179.056	3.73	Beta-D-Glucose	HMDB0000516	C6H12O6	55	-1.1145	3.48946	1.61972
7.44_258.1822m/z	258.182	7.44	Isoleucyl-Lysine	HMDB0028912	C12H25N3O3	55.1	-0.502895	2.48839		0.43624	0.340301
11.82_168.0431m/z	168.043	11.82	Phosphodimethylethanolamine	HMDB0060244	C4H12NO4P	55.1	-0.193286	5.19186	4.04619	5.29256
11.35_402.9936m/z	402.994	11.35	Uridinediphosphate(UDP)	97	C9H14N2O12P2	55.1	-3.16348	2.48396	0.550492	0.305277	0.559283
0.78_211.1338m/z	211.134	0.78	Dihydrojasmonicacid	HMDB0033601	C12H20O3	55.8	-0.619616	1.71211		2.02872	1.49219
10.02_346.0558m/z	346.056	10.02	Adenosinemonophosphate	34478	C10H14N5O7P	55.9	0.0957898	5.04247	0.51578
6.63_130.0511m/z	130.051	6.63	Trans-4-Hydroxy-L-proline	257	C5H9NO3	55.9	0.943765	1.44667		0.462953	0.476382
3.38_164.0718m/z	164.072	3.38	L-Phenylalanine	HMDB0000159	C9H11NO2	56	0.538374	4.6152		1.81909
3.83_146.0455m/z	146.046	3.83	L-Glutamicacid	HMDB0000148	C5H9NO4	56.1	-2.27665	1.34788	0.29228	0.108744	0.368447
3.19_160.0614m/z	160.061	3.19	N-methyl-L-glutamicAcid	HMDB0062660	C6H11NO4	56.1	-0.919533	1.18669	0.22473	0.0518463	0.237636
11.56_259.0224m/z	259.022	11.56	D-fructose1-phosphate	HMDB0060467	C6H13O9P	57	-0.277392	2.46266		0.575669
8.16_179.0563m/z	179.056	8.16	myo-Inositol	144	C6H12O6	57.1	0.993235	3.308	0.653567	0.597827
3.41_203.0826m/z	203.083	3.41	L-Tryptophan	HMDB0000929	C11H12N2O2	57.2	0.231658	3.71874	1.52992	1.81491
0.92_720.4974m/z	720.497	0.92	PE(20:5(5Z,8Z,11Z,14Z,17Z)/P-16:0)	HMDB0009477	C41H72NO7P	57.7	0.0301141	2.56368		2.22821	3.2729
13.75_742.0681m/z	742.068	13.75	NicotinamideAdenineDinucleotidePhosphate(NADP+)	102	C21H28N7O17P3	58	-0.108587	1.58621	2.36216		0.640123
8.24_374.1209m/z	374.121	8.24						1.67123			0.525748
5.07_333.0882m/z	333.088	5.07						1.56483			0.543724
4.87_467.0585m/z	467.058	4.87						1.08576			0.57285
12.48_781.8494m/z	781.849	12.48						1.44117			0.60573
0.92_554.3456m/z	554.346	0.92						1.8296			2.43141
1.35_857.5182m/z	857.518	1.35						2.18118			10.7361
11.85_648.1538m/z	648.154	11.85						1.22552		-1.37469e+08
11.81_974.3436m/z	974.344	11.81						1.19972		-7.66981e+07
4.22_437.2129m/z	437.213	4.22						4.95492		0.307989
3.35_526.1649m/z	526.165	3.35						10.3207		0.334069
13.59_128.0345m/z	128.035	13.59						1.20123		0.516465
7.03_358.1340m/z	358.134	7.03						1.38632		0.555256
13.71_755.3871m/z	755.387	13.71						1.4852		0.589975
3.83_215.0324m/z	215.032	3.83						1.28711		0.653558
0.95_833.5185m/z	833.519	0.95						1.11312		3.23133
0.95_857.5184m/z	857.518	0.95						1.2359		7.54646
3.25_270.9732m/z	270.973	3.25						1.28287		9.88239
5.34_206.0098m/z	206.01	5.34						1.37895		0.013228	0.0180346
8.93_247.0388m/z	247.039	8.93						1.44275		0.35968	0.229156
6.83_654.3397m/z	654.34	6.83						1.1788		0.204873	0.253121
11.48_386.2759m/z	386.276	11.48						1.28876		0.35156	0.377
6.64_310.1108m/z	310.111	6.64						1.46647		0.631279	0.531882
13.62_650.7922m/z	650.792	13.62						1.43498		0.506211	0.536479
8.51_650.2156m/z	650.216	8.51						4.42595		0.441164	0.5541
8.21_573.2188m/z	573.219	8.21						2.13977		0.421827	0.576403
8.05_286.0602m/z	286.06	8.05						5.44852		0.448359	0.581493
6.66_88.0407m/z	88.0407	6.66						1.83699		0.603095	0.582482
8.52_170.0454m/z	170.045	8.52						1.24965		0.440933	0.59201
12.48_781.3483m/z	781.348	12.48						1.78521		0.684246	0.610174
8.52_290.0873m/z	290.087	8.52						1.29684		0.468289	0.613307
13.71_754.8862m/z	754.886	13.71						2.04266		0.547457	0.624275
10.21_194.9458m/z	194.946	10.21						1.30309		0.542095	0.652232
0.76_374.2441m/z	374.244	0.76						1.93533		1.65983	1.5152
9.16_736.4102m/z	736.41	9.16						1.20154		1.62511	1.79409
9.16_735.9093m/z	735.909	9.16						1.52858		1.62644	1.81587
0.79_353.0480m/z	353.048	0.79						2.02643		1.63252	1.84615
0.78_559.2897m/z	559.29	0.78						1.12861		2.21553	2.14528
6.70_374.0925m/z	374.092	6.7						1.18585		3.96337	2.16659
7.02_788.4332m/z	788.433	7.02						1.22786		6.08481	2.339
5.25_366.1074m/z	366.107	5.25						1.90485		3.39402	2.47097
0.90_816.5770m/z	816.577	0.9						2.91845		2.14905	2.52297
0.71_473.2821m/z	473.282	0.71						4.26418		1.94852	2.54056
0.92_788.5341m/z	788.534	0.92						1.88363		2.50997	2.69128
10.63_575.7974m/z	575.797	10.63						1.34487		2.36097	2.79936
0.90_760.5254m/z	760.525	0.9						1.4751		2.64939	2.96313
0.93_761.5802m/z	761.58	0.93						1.81679		2.75727	2.97993
0.81_301.2161m/z	301.216	0.81						1.64792		3.05492	3.08613
0.92_762.5157m/z	762.516	0.92						2.30429		2.77511	3.3881
0.90_748.5280m/z	748.528	0.9						4.88558		2.54737	3.53898
2.46_737.5360m/z	737.536	2.46						1.07246		3.93401	3.88577
0.89_836.5555m/z	836.556	0.89						1.2239		3.92987	3.9534
0.92_736.5014m/z	736.501	0.92						1.53489		3.09794	3.98129
0.90_751.5468m/z	751.547	0.9						1.71735		3.01587	4.47043
0.89_864.5772m/z	864.577	0.89						1.79784		4.07934	4.57539
0.90_814.5607m/z	814.561	0.9						1.44053		2.93245	4.64246
0.92_764.5287m/z	764.529	0.92						4.67035		4.32102	4.74523
3.04_761.5805m/z	761.581	3.04						1.13345		8.08569	5.20248
0.87_912.5738m/z	912.574	0.87						1.08102		10.2356	5.57718
0.90_838.5640m/z	838.564	0.9						1.87402		4.69327	5.77558
0.95_883.5343m/z	883.534	0.95						2.37343		3.57452	5.78642
1.17_838.5588m/z	838.559	1.17						1.27993		7.60574	8.55625
0.92_555.2734m/z	555.273	0.92						1.41083		10.6824	16.9124
0.75_843.5165m/z	843.516	0.75						1.23287	0.118977
0.75_841.5016m/z	841.502	0.75						1.26442	0.133278
0.92_780.5207m/z	780.521	0.92						1.33898	0.251416
0.75_845.5285m/z	845.529	0.75						1.25456	0.254885
0.75_822.5347m/z	822.535	0.75						1.49048	0.263603
0.75_599.4982m/z	599.498	0.75						1.15184	0.314007
1.34_582.3737m/z	582.374	1.34						1.37989	0.37752
1.38_540.3325m/z	540.332	1.38						1.40389	0.422149
1.35_566.3486m/z	566.349	1.35						1.49848	0.483515
10.86_386.0332m/z	386.033	10.86						3.03208	0.493074
1.38_554.3458m/z	554.346	1.38						3.44412	0.533721
11.05_760.0783m/z	760.078	11.05						1.19606	0.630179
6.80_442.1628m/z	442.163	6.8						1.33463	1.71005
14.26_535.0842m/z	535.084	14.26						1.27931	1.77533
8.61_282.0647m/z	282.065	8.61						2.10845	1.91375
8.79_339.0857m/z	339.086	8.79						1.31798	2.2202
13.95_524.9616m/z	524.962	13.95						1.96924	4.61915		0.212202
4.65_990.7953m/z	990.795	4.65						1.38587	1.91454		0.348318
11.87_522.0405m/z	522.04	11.87						1.90806	2.58941		0.557354
0.92_580.3617m/z	580.362	0.92						1.86696	0.502933		1.92184
0.90_826.5929m/z	826.593	0.9						1.69804	0.457786		2.49866
0.89_852.6095m/z	852.61	0.89						2.03157	0.596733		2.9382
0.89_850.5954m/z	850.595	0.89						1.66219	0.576575		2.95622
0.89_824.5792m/z	824.579	0.89						1.49829	0.479238		4.13557
0.89_822.5629m/z	822.563	0.89						1.16373	0.517817		5.75287
1.94_541.1719m/z	541.172	1.94						6.07476	0.0333096	0.0169826
1.94_540.1746m/z	540.175	1.94						2.34395	0.0359837	0.0191082
1.91_354.1041m/z	354.104	1.91						1.82882	0.0800373	0.0986537
1.93_312.0938m/z	312.094	1.93						2.0095	0.0890068	0.142435
1.93_326.1098m/z	326.11	1.93						3.02373	0.0994587	0.100122
11.94_540.0531m/z	540.053	11.94						1.49906	0.11421	0.110759
8.64_222.9771m/z	222.977	8.64						1.99535	0.215675	0.133603
8.66_190.9514m/z	190.951	8.66						1.25086	0.225375	0.149654
1.91_302.0648m/z	302.065	1.91						1.11182	0.248797	0.303944
3.48_258.0560m/z	258.056	3.48						1.716	0.249653	0.238718
8.64_565.0927m/z	565.093	8.64						1.72089	0.256665	0.163758
3.48_256.0587m/z	256.059	3.48						2.98078	0.257763	0.237353
1.93_518.1444m/z	518.144	1.93						3.5326	0.260683	0.0895261
1.94_517.1474m/z	517.147	1.94						1.39472	0.267788	0.0993783
13.18_495.1013m/z	495.101	13.18						2.07933	0.285363	0.204251
7.39_799.9347m/z	799.935	7.39						1.1053	0.285368	0.18309
0.92_509.2874m/z	509.287	0.92						1.67944	0.288613	0.638507
13.18_495.6022m/z	495.602	13.18						1.15055	0.308623	0.224865
1.41_540.3620m/z	540.362	1.41						1.30434	0.354174	0.514024
8.45_537.1662m/z	537.166	8.45						1.69291	0.395638	0.389154
10.58_510.9889m/z	510.989	10.58						2.46704	0.42738	0.260743
11.56_519.0507m/z	519.051	11.56						1.7623	0.475255	0.346597
11.35_303.0347m/z	303.035	11.35						1.3906	0.491278	0.434928
11.35_928.5909m/z	928.591	11.35						1.47017	0.503283	0.418508
11.35_494.0459m/z	494.046	11.35						3.10767	0.508422	0.465146
3.86_974.5579m/z	974.558	3.86						1.11391	0.562476	0.169576
11.35_302.5339m/z	302.534	11.35						3.39607	0.59879	0.604752
7.56_245.0434m/z	245.043	7.56						4.1463	0.614011	0.530935
10.58_254.9913m/z	254.991	10.58						2.02561	0.664996	0.578678
14.11_343.9938m/z	343.994	14.11						2.2497	0.674103	0.50368
3.76_398.1653m/z	398.165	3.76						1.85569	1.54325	1.49276
8.58_487.1766m/z	487.177	8.58						2.02556	1.99129	2.55759
9.82_88.0405m/z	88.0405	9.82						1.91759	2.30391	2.3979
14.25_392.9018m/z	392.902	14.25						2.03711	2.50358	1.77302
5.13_399.0944m/z	399.094	5.13						1.36013	2.56011	3.04879
14.26_251.9621m/z	251.962	14.26						1.30809	3.59533	2.68973
12.32_354.0604m/z	354.06	12.32						1.51015	4.20572	6.75471
11.87_374.0546m/z	374.055	11.87						1.0908	15.3905	12.5373
11.85_931.1797m/z	931.18	11.85						1.79481	28.7461	19.0195
11.87_556.6202m/z	556.62	11.87						2.00089	161.195	119.762
11.81_791.2785m/z	791.279	11.81						1.91574	291.994	367.835
5.35_934.0859m/z	934.086	5.35						1.70246	0.217361	0.000768679	0.00339799
5.37_862.0338m/z	862.034	5.37						1.87023	0.557716	0.00256175	0.00419639
5.35_852.0833m/z	852.083	5.35						1.91582	0.234318	0.00106084	0.00434344
5.37_780.0313m/z	780.031	5.37						2.23574	0.55674	0.00323365	0.00552542
5.37_944.0374m/z	944.037	5.37						1.65741	0.535741	0.00383553	0.00696225
5.37_616.0245m/z	616.024	5.37						2.1928	0.613154	0.00492504	0.00769301
5.37_698.0276m/z	698.028	5.37						2.25294	0.566954	0.00459608	0.00798712
5.35_688.0768m/z	688.077	5.35						2.257	0.27264	0.00264704	0.00940559
5.35_534.0209m/z	534.021	5.35						2.03099	0.645021	0.00635469	0.00964901
5.35_452.0174m/z	452.017	5.35						1.80105	0.645578	0.00729418	0.0107763
5.35_770.0800m/z	770.08	5.35						2.32194	0.244017	0.00280381	0.0109854
5.34_442.0667m/z	442.067	5.34						1.95559	0.293005	0.00600199	0.0200246
5.34_360.0640m/z	360.064	5.34						1.47509	0.287582	0.00619748	0.0212912
5.35_524.0699m/z	524.07	5.35						2.11015	0.28656	0.00899562	0.0305763
5.34_196.0587m/z	196.059	5.34						1.74513	0.3389	0.0130044	0.037304
8.52_617.2046m/z	617.205	8.52						5.79408	0.58839	0.0529299	0.0886472
12.04_607.1733m/z	607.173	12.04						1.62957	0.480627	0.0788932	0.162102
2.66_303.0492m/z	303.049	2.66						1.54038	0.413876	0.0701446	0.169558
8.51_504.1562m/z	504.156	8.51						1.73646	0.211982	0.040142	0.18833
11.36_806.9979m/z	806.998	11.36						2.74639	0.407245	0.097803	0.245923
14.25_505.4581m/z	505.458	14.25						1.40908	7.81249	2.28176	0.292765
8.07_573.1268m/z	573.127	8.07						1.63528	0.628877	0.193455	0.305222
14.26_493.9454m/z	493.945	14.26						1.72486	18.0273	6.33851	0.353382
11.32_704.0427m/z	704.043	11.32						2.75046	0.360521	0.129309	0.357558
13.95_603.9561m/z	603.956	13.95						2.17307	3.24372		0.397224
12.29_651.2477m/z	651.248	12.29						1.2918	2.13268		0.400645
14.43_563.9664m/z	563.966	14.43						1.24066	4.38671	2.03971	0.46397
12.06_128.0348m/z	128.035	12.06						1.18146	0.560329	0.265771	0.478221
8.21_830.3225m/z	830.322	8.21						1.64106	0.666902	0.322691	0.483501
14.26_484.9737m/z	484.974	14.26						1.60883	5.69352	2.87053	0.507946
11.36_604.1607m/z	604.161	11.36						1.76925	0.437533	0.226688	0.518881
12.04_285.0727m/z	285.073	12.04						5.20343	0.64578	0.359565	0.556666
11.87_282.0197m/z	282.02	11.87						1.25499	2.05546		0.567717
14.26_504.9315m/z	504.932	14.26						1.39209	6.04329	3.43099	0.56945
11.81_796.2064m/z	796.206	11.81						1.30882	65.6758	37.603	0.580585
8.52_87.0084m/z	87.0084	8.52						1.21852	0.609015	0.361422	0.592949
13.96_587.9783m/z	587.978	13.96						4.67759	2.1445		0.608625
11.87_748.1141m/z	748.114	11.87						2.79493	5.44102	3.33493	0.612519
14.26_564.9514m/z	564.951	14.26						3.57224	4.4039	2.73519	0.622134
14.87_788.2576m/z	788.258	14.87						1.31302	2.62211	1.67386	0.637906
9.91_376.1005m/z	376.101	9.91						1.58646	0.53758	0.34408	0.641434
14.79_787.7611m/z	787.761	14.79						1.37819	2.66178	1.72068	0.646001
11.87_373.5533m/z	373.553	11.87						2.88756	5.02505	3.28158	0.652024
14.79_707.2287m/z	707.229	14.79						1.28548	2.26137	1.49719	0.662172
0.81_283.2634m/z	283.263	0.81						3.05616	0.591918		1.86091
8.58_496.1769m/z	496.177	8.58						2.16346	2.44656	5.72656	2.39022
0.75_465.2896m/z	465.29	0.75						1.37824	0.460925		2.40226
0.79_305.2471m/z	305.247	0.79						1.05124	0.641874	1.8653	2.90127
0.92_740.5230m/z	740.523	0.92						1.53214	0.515258		3.54731
1.38_578.3453m/z	578.345	1.38						1.97525	0.330787	2.62997	7.87382
0.96_885.5488m/z	885.549	0.96						2.8004	0.50697	4.23	8.33633
0.75_817.5016m/z	817.502	0.75						1.77839	0.256832	6.82303	27.1623
3.67_601.1515m/z	601.152	3.67						1.02287	0.00121332	0.00625734
1.99_424.1262m/z	424.126	1.99						1.68719	0.0510091	0.0795405
11.92_663.0850m/z	663.085	11.92						1.25635	0.0861895	0.0824608
1.91_459.1619m/z	459.162	1.91						1.80195	0.164234	0.104568
12.06_633.1216m/z	633.122	12.06						1.18858	0.41536	0.122427
11.35_628.0552m/z	628.055	11.35						1.04981	0.54883	0.743063
8.63_453.1012m/z	453.101	8.63						9.45082	0.550266	0.424691
9.71_653.3629m/z	653.363	9.71						1.51781	0.570756	0.401254
6.98_430.1546m/z	430.155	6.98						1.86487	1.82831	1.95992
14.26_580.9280m/z	580.928	14.26						1.31414	5.2224	4.1928
11.81_608.2115m/z	608.212	11.81						2.66144	24.9326	28.7543
11.81_425.1446m/z	425.145	11.81						2.17235	33.8689	41.3353
11.87_465.0860m/z	465.086	11.87						2.19724	46.4671	32.8352
