# Supplementary material for: Comprehensive Metabolomic Analysis Reveals Dynamic Metabolic Reprogramming in Hep3B Cells with Aflatoxin B1 Exposure
Source: Toxins (Basel). 2021 May 27;13(6):384. doi: 10.3390/toxins13060384 (PMC8229485; doi:10.3390/toxins13060384)
Supplement: Supplementary file 1 [file toxins-13-00384-s001.zip › Table S4.xlsx]

## Sheet: RPLC-POS
Table S4. The key information of 161 differential metabolites obtained by RPLC-POS analysis mode
Metabolite feature	m/z	RT(min)	Metabolite name	Metabolite ID	Formula	Score	Mass Error(ppm)	VIP	FC(16/DMSO)	FC(32/DMSO)	FC(32/16)
1.22_184.0728m/z	184.073	1.22	Phosphocholine	3318	C5H14NO4P	56.4	-2.77145	8.63026	5.67004	8.21999
8.29_243.0870m/z	243.087	8.29	Lumichrome	64742	C12H10N4O2	55.5	-2.72738	1.63191		2.12793	4.76882
5.78_152.0558m/z	152.056	5.78	Guanine	315	C5H5N5O	55.2	-5.9585	1.44173	0.654297	0.397754
6.58_359.2278m/z	359.228	6.58	IleGlnVal	17167	C16H30N4O5	55.1	-3.16077	1.34988	1.87515	1.90559
1.32_114.0652m/z	114.065	1.32	Creatinine	8	C4H7N3O	55	-8.73504	1.12687	1.53341
12.61_357.2782m/z	357.278	12.61	Tetracosahexaenoicacid	HMDB0002007	C24H36O2	54.9	-1.7059	8.44493	163.091	18.1848	0.248813
12.22_288.1986m/z	288.199	12.22	CAY10444	44894	C15H29NO2S	53.7	-2.13425	2.62491	1.84301	3.03101	1.6287
15.33_135.0794m/z	135.079	15.33	Chavicol	71442	C9H10O	53.7	-7.42522	2.09827		5.53924	2.82969
5.78_284.0983m/z	284.098	5.78	Guanosine	HMDB0000133	C10H13N5O5	53.1	-2.24345	1.12559	0.60754	0.316679	0.544793
2.37_308.0909m/z	308.091	2.37	Glutathione	HMDB0000125	C10H17N3O6S	52.9	-0.634135	26.2437	1.83057		0.65033
12.61_375.2881m/z	375.288	12.61	3b-Hydroxy-5-cholenoicacid	HMDB0000308	C24H38O3	52.9	-3.4	2.59032	90.9848	11.6715	0.266375
12.52_195.1009m/z	195.101	12.52	Butylsalicylate	HMDB0040730	C11H14O3	52.9	-3.22442	2.10893	1.81149	2.3919
2.12_162.0749m/z	162.075	2.12	Glutamate,gamma-methylester	HMDB0061715	C6H11NO4	52.7	-7.08271	1.60171	4.37812	4.09673	2.91829
1.28_137.0701m/z	137.07	1.28	Trigonellinamide	274	C7H8N2O	51.9	-6.01635	3.693	6.95416	6.47826
12.52_167.0698m/z	167.07	12.52	Ethylsalicylate	HMDB0029817	C9H10O3	51.7	-2.92042	2.55538	1.86139	2.44729
5.78_269.0877m/z	269.088	5.78	Inosine	HMDB0000195	C10H12N4O5	51.6	-1.34816	1.36595		0.240638	0.166337
6.05_328.1381m/z	328.138	6.05	N-(1-Deoxy-1-fructosyl)phenylalanine	HMDB0037846	C15H21NO7	51	-2.9	1.25033		1.83051
6.50_261.1437m/z	261.144	6.5	gamma-Glutamylleucine	HMDB0011171	C11H20N2O5	50.8	-3.02298	2.71123	2.82105	1.85248	0.66002
11.74_468.3079m/z	468.308	11.74	LysoPC(14:0/0:0)	HMDB0010379	C22H46NO7P	50.6	-1.23853	5.12099		4.31285	3.55453
1.46_204.1225m/z	204.123	1.46	Acetylcarnitine	956	C9H17NO4	50.5	-2.78318	6.43273	0.474066	0.229493	0.490108
14.58_524.3700m/z	524.37	14.58	LysoPC(18:0)	HMDB0010384	C26H54NO7P	50.5	-2.1114	6.23115	0.484045		2.0518
6.46_146.0594m/z	146.059	6.46	4-formylIndole	96392	C9H7NO	50.4	-4.39856	3.07858	1.55194
12.34_502.2915m/z	502.291	12.34	LysoPE(0:0/20:4(8Z,11Z,14Z,17Z))	HMDB0011488	C25H44NO7P	50.4	-2.6	2.77446			3.86608
5.69_666.1305m/z	666.13	5.69	NADH	HMDB0001487	C21H29N7O14P2	50	-2.35406	7.66727	0.543838	0.324935	0.610504
10.62_344.2790m/z	344.279	10.62	Dodecanoylcarnitine	HMDB0002250	C19H37NO4	49.9	-1.42078	2.62744	0.347598	0.0704102	0.207828
5.83_162.0573m/z	162.057	5.83	trans-S-(1-Propenyl)-L-cysteine	HMDB0029440	C6H11NO2S	49.6	-6.10056	1.12699		2.99081	2.08689
13.37_480.3078m/z	480.308	13.37	LysoPE(18:1(9Z)/0:0)	HMDB0011506	C23H46NO7P	49	-1.42459	3.57846			1.85563
9.64_287.0909m/z	287.091	9.64	(R)-Pabulenol	HMDB0034438	C16H14O5	49	-1.74491	1.56785	106.724	210.167	12.6209
15.33_119.0845m/z	119.085	15.33	Indane	HMDB0059837	C9H10	49	-8.6	1.82367		4.74489	2.44572
1.29_162.1119m/z	162.112	1.29	L-Carnitine	HMDB0000062	C7H15NO3	48.9	-3.30412	4.6525		0.495162	0.491705
3.55_508.0021m/z	508.002	3.55	Adenosinetriphosphate	HMDB0000538	C10H16N5O13P3	48.8	-1.75127	9.65814	4.2772	3.95653
2.09_118.0856m/z	118.086	2.09	5-Aminopentanoicacid	HMDB0003355	C5H11NO2	48.8	-5.72787	2.93451	1.58384		0.662154
1.41_293.0979m/z	293.098	1.41	EdeticAcid	HMDB0015109	C10H16N2O8	48.8		10.5565		2.26335	1.91592
5.66_260.1593m/z	260.159	5.66	Isoleucyl-Gamma-glutamate	HMDB0028921	C11H21N3O4	48.8	-4.4791	1.20842	1.65151	1.54491
7.58_194.0809m/z	194.081	7.58	Phenylacetylglycine	HMDB0000821	C10H11NO3	48.5	-1.23382	2.80216	2.55773	1.6295	0.64188
13.43_544.3357m/z	544.336	13.43	LysoPC(20:4(5Z,8Z,11Z,14Z))	HMDB0010395	C28H50NO7P	48.4	2.95533	4.43133		3.0403	2.40626
11.88_500.2762m/z	500.276	11.88	LysoPE(0:0/20:5(5Z,8Z,11Z,14Z,17Z))	HMDB0011489	C25H42NO7P	48.4	-2	3.6361	1.83315	7.6156	4.39836
1.23_120.0643m/z	120.064	1.23	L-Homoserine	HMDB0000719	C4H9NO3	48.2	-9.88298	1.48511	1.61178
6.06_149.0588m/z	149.059	6.06	3,4-Dihydro-2H-1-benzopyran-2-one	HMDB0036626	C9H8O2	48.2	-5.98937	1.74322	1.5038
9.71_313.0708m/z	313.071	9.71	AflatoxinB1	HMDB0006552	C17H12O6	48.1	0.330155	5.77061	16974.5	11528.6	0.643176
13.06_518.3193m/z	518.319	13.06	LysoPC(18:3(6Z,9Z,12Z))	HMDB0010387	C26H48NO7P	48	-9.3	3.24668		1.93073	1.55978
14.47_482.3235m/z	482.324	14.47	LysoPE(18:0/0:0)	HMDB0011130	C23H48NO7P	48	-1.2	2.94697		1.61239	2.329
11.49_372.3112m/z	372.311	11.49	Tetradecanoylcarnitine	HMDB0005066	C21H41NO4	47.9	0.88098	7.36544	0.26263	0.0619964	0.258631
12.85_570.3549m/z	570.355	12.85	LysoPC(22:5(4Z,7Z,10Z,13Z,16Z))	HMDB0010402	C30H52NO7P	47.9	-0.9	4.33663	1.77216	5.58635	3.29098
6.74_246.1699m/z	246.17	6.74	Pivaloylcarnitine	HMDB0041993	C12H23NO4	47.8	-0.3649	9.61812		0.430495	0.317411
7.00_407.2643m/z	407.264	7	LysIlePhe	20694	C21H34N4O4	47.7	-2.53448	1.64418		1.63784	1.94054
14.11_259.1895m/z	259.19	14.11	2-Hydroxypropyl2-isopropyl-5-methylcyclohexylcarbonate	HMDB0059946	C14H26O4	47.7	-3.40679	3.20431		5.73286	3.21203
13.43_522.3552m/z	522.355	13.43	LysoPC(18:1(9Z))	HMDB0002815	C26H52NO7P	47.6	-0.5	17.3878		3.73858	2.97413
5.82_218.1384m/z	218.138	5.82	Propionylcarnitine	HMDB0000824	C10H19NO4	47.5	-1.20969	6.53875	0.586793	0.131574	0.230643
5.61_560.0769m/z	560.077	5.61	Adenosinediphosphateribose	HMDB0001178	C15H23N5O14P2	47.5	-3.62749	1.17543	0.500553	0.297317	0.58746
1.67_608.0878m/z	608.088	1.67	UDP-N-acetyl-D-mannosamine	HMDB0013112	C17H27N3O17P2	47.5	-1.6	8.30647	0.551148	0.44509
13.79_510.3562m/z	510.356	13.79	1-heptadecanoyl-sn-glycero-3-phosphocholine	24068	C25H52NO7P	47.4	1.58101	1.64418	0.542108		2.69927
12.55_520.3388m/z	520.339	12.55	LysoPC(18:2(9Z,12Z))	HMDB0010386	C26H50NO7P	47.4	-1.8	11.0005	1.90681	14.6835	10.7227
12.56_544.3389m/z	544.339	12.56	LysoPC(20:4(8Z,11Z,14Z,17Z))	HMDB0010396	C28H50NO7P	47.4	-1.6	8.46784	1.91723	12.0729	6.89172
5.98_247.1281m/z	247.128	5.98	gamma-Glutamylvaline	HMDB0011172	C10H18N2O5	47.4	-2.99661	1.64679	2.40117		0.610927
12.61_269.1739m/z	269.174	12.61	3,11,12-Trihydroxy-1(10)-spirovetiven-2-one	HMDB0038154	C15H24O4	47.3	-3.1829	1.11948	1.82938	2.44878
6.08_166.0861m/z	166.086	6.08	L-Phenylalanine	HMDB0000159	C9H11NO2	47.2	-0.911966	8.54857	1.59496
9.74_316.2475m/z	316.248	9.74	Decanoylcarnitine	HMDB0000651	C17H33NO4	47	-2.21727	1.36636	0.353642	0.107434	0.305109
13.87_286.2367m/z	286.237	13.87	Myristoylglycine	HMDB0013250	C16H31NO3	47	-3.5	1.29328		0.191203	0.298947
7.63_260.1853m/z	260.185	7.63	L-Hexanoylcarnitine	HMDB0000756	C13H25NO4	46.9	-1.4499	3.0292		0.218808	0.268555
5.60_305.0961m/z	305.096	5.6	N-Acetylaspartylglutamicacid	HMDB0001067	C11H16N2O8	46.9	-5.9	2.50888		0.535012	0.550329
13.06_496.3394m/z	496.339	13.06	LysoPC(16:0)	HMDB0010382	C24H50NO7P	46.8	-0.740764	13.7417		2.25842	2.05904
14.85_688.5194m/z	688.519	14.85	PE(15:0/P-18:1(11Z))	HMDB0008918	C38H74NO7P	46.6	-11.9	7.29571		1.58604
14.30_417.3346m/z	417.335	14.3	3beta-Hydroxy-5-cholestenoate	HMDB0012453	C27H44O3	46.6	-4.23544	1.251		0.490681	0.584625
6.17_184.0960m/z	184.096	6.17	3,4,5,6-Tetrahydrohippuricacid	HMDB0061679	C9H13NO3	46.6	-4.60767	1.76896	1.59833
13.49_840.5671m/z	840.567	13.49	PS(18:3(6Z,9Z,12Z)/22:1(13Z))	HMDB0112461	C46H82NO10P	46.6	-9.3	7.68553	108.211	10.457	0.25719
5.03_95.0483m/z	95.0483	5.03	Phenol	HMDB0000228	C6H6O	46.3	-8.45686	1.73102	1.59153
11.96_195.1371m/z	195.137	11.96	Neocnidilide	HMDB0034450	C12H18O2	46.3	-4.21902	1.23632		2.20198	1.52405
2.39_179.0477m/z	179.048	2.39	Cysteinylglycine	HMDB0000078	C5H10N2O3S	46.2	-4.70658	6.53256	1.78891
13.62_309.2054m/z	309.205	13.62	(6E,8E,10R,12Z)-10-Hydroxy-3-oxooctadecatrienoicacid	HMDB0062357	C18H28O4	46.2	-2.19548	1.9054		4.51055	2.94637
12.32_400.3427m/z	400.343	12.32	L-Palmitoylcarnitine	HMDB0000222	C23H45NO4	46.1	1.35341	10.4125	0.262089	0.137519	0.548545
12.52_568.3387m/z	568.339	12.52	LysoPC(22:6(4Z,7Z,10Z,13Z,16Z,19Z))	HMDB0010404	C30H50NO7P	46.1	-1.9	4.55053		4.43845	3.10891
12.74_508.3385m/z	508.339	12.74	LysoPE(0:0/20:1(11Z))	HMDB0011482	C25H50NO7P	46.1	-2.5	4.17496	1.93914	7.07901	4.48096
12.37_482.3232m/z	482.323	12.37	LysoPC(15:0)	HMDB0010381	C23H48NO7P	45.8	-1.9	2.53295		4.80522	3.86923
5.64_344.1324m/z	344.132	5.64	N-(1-Deoxy-1-fructosyl)tyrosine	HMDB0037845	C15H21NO8	45.7	-4.7	1.19791		3.7016	1.95659
5.90_768.1211m/z	768.121	5.9	CoenzymeA	HMDB0001423	C21H36N7O16P3S	45.6	-1.8	1.70867			0.523993
12.15_599.3172m/z	599.317	12.15	1-Oleoylglycerophosphoinositol	HMDB0061693	C27H51O12P	45.6	-3.1	3.43658	1.7244		0.620575
14.30_279.1580m/z	279.158	14.3	2-[(3,3-dimethyloxiran-2-yl)methyl]-4-(3-methylbut-2-en-1-yl)benzene-1,3,5-triol	HMDB0133048	C16H22O4	45.5	-3.97588	1.85315		1.86885
13.59_752.5159m/z	752.516	13.59	PE(15:0/22:5(4Z,7Z,10Z,13Z,16Z))	HMDB0008911	C42H74NO8P	45.4	-8.7	13.4939	113.057	11.6405	0.265127
5.68_156.1371m/z	156.137	5.68	2,2,6,6-Tetramethyl-4-piperidinone	HMDB0031179	C9H17NO	45.3	-7.4	1.36555	1.88088	2.18249
5.90_350.1009m/z	350.101	5.9	S-(Formylmethyl)glutathione	HMDB0060507	C12H19N3O7S	45.3	-2.2	1.98135	2.73998		0.51486
13.63_235.1679m/z	235.168	13.63	Petasalbin	HMDB0035639	C15H22O2	45.2	-5.90163	2.09295	1.65022	2.27561
5.78_137.0450m/z	137.045	5.78	Hypoxanthine	HMDB0000157	C5H4N4O	45.1	-5.60476	2.42735		0.209416	0.134675
6.31_232.1545m/z	232.155	6.31	Isobutyryl-L-carnitine	HMDB0000736	C11H21NO4	45	0.629046	8.57623		0.409977	0.391218
12.50_426.3570m/z	426.357	12.5	Octadecenoylcarnitine	HMDB0094687	C25H47NO4	45	-1.8	9.40083	0.144054	0.0645547	0.451507
10.89_573.3017m/z	573.302	10.89	1-hexadecanoyl-sn-glycero-3-phospho-D-myo-inositol	HMDB0062714	C25H49O12P	44.9	4.50124	1.11789	1.65303	1.73428
9.91_297.0754m/z	297.075	9.91	Gyrocyanin	HMDB0034126	C17H12O5	44.8	-1.18462	1.01974	15.0726	5.70686	0.387209
15.64_702.5356m/z	702.536	15.64	PE(16:0/P-18:1(11Z))	HMDB0008951	C39H76NO7P	44.6	-10.8	10.004		1.58467
12.06_452.2781m/z	452.278	12.06	LysoPE(16:1(9Z)/0:0)	HMDB0011504	C21H42NO7P	44.6	2.04785	2.0144		2.30007	1.96676
12.49_478.2917m/z	478.292	12.49	LysoPE(18:2(9Z,12Z)/0:0)	HMDB0011507	C23H44NO7P	44.6	6.66904	2.26528		4.04976	4.7855
13.07_428.3721m/z	428.372	13.07	Stearoylcarnitine	HMDB0000848	C25H49NO4	44.5	-3	4.24285	0.161816	0.213394
13.42_438.2971m/z	438.297	13.42	PE(P-16:0e/0:0)	HMDB0011152	C21H44NO6P	44.5	-1.7	4.27947	0.585989	0.530669
12.78_528.3073m/z	528.307	12.78	LysoPE(0:0/22:5(4Z,7Z,10Z,13Z,16Z))	HMDB0011494	C27H46NO7P	44.5	-2.3	2.31555	1.63241	3.87934	2.39645
6.31_786.1629m/z	786.163	6.31	FAD	HMDB0001248	C27H33N9O15P2	44.4	-1.96307	1.97377		0.5628	0.61115
2.09_72.0803m/z	72.0803	2.09	Pyrrolidine	HMDB0031641	C4H9N	44.4	-6.6	2.35081	1.60305
12.99_504.3075m/z	504.308	12.99	LysoPE(0:0/20:3(11Z,14Z,17Z))	HMDB0011484	C25H46NO7P	44.2	-2	1.09064		4.62741	4.11636
12.74_209.1526m/z	209.153	12.74	Eremopetasinorol	HMDB0029668	C13H20O2	44.2	-4.9	1.11067	1.83918	3.3302	1.88649
11.39_416.3365m/z	416.337	11.39	3-hydroxyhexadecanoylcarnitine	HMDB0061642	C23H45NO5	44.1	-1.4	2.39026	0.0843566	0.0108533	0.120884
13.90_383.2783m/z	383.278	13.9	Misoprostol	HMDB0015064	C22H38O5	43.9	-2.27481	3.63783	37.5924	5.84707	0.358554
15.21_317.2461m/z	317.246	15.21	Calusterone	HMDB0004627	C21H32O2	43.8	-4.38954	1.23065	1.93177	28.0354	217.957
12.52_502.2919m/z	502.292	12.52	LysoPE(20:4(8Z,11Z,14Z,17Z)/0:0)	HMDB0011518	C32H39NO4	43.7	-6.50012	5.32024	1.51644	7.01425	4.70715
13.45_482.3598m/z	482.36	13.45	Lyso-PAFC-16	24070	C24H52NO6P	43.6	-1.49323	8.05229	0.553924	0.194331	0.350949
8.79_288.2164m/z	288.216	8.79	L-Octanoylcarnitine	HMDB0000791	C15H29NO4	43.5	-2.00565	1.3542	0.396407	0.117232	0.311423
5.93_271.0744m/z	271.074	5.93	3-(Cystein-S-yl)acetaminophen	HMDB0240217	C11H14N2O4S	43.5	-1.3	2.09778	1.78292
12.11_516.3045m/z	516.304	12.11	LysoPC(18:4(6Z,9Z,12Z,15Z))	HMDB0010389	C26H46NO7P	43.4	3.34921	3.90088		7.97021	4.51038
5.91_459.1714m/z	459.171	5.91	a-L-Fucopyranosyl-(1->2)-b-D-galactopyranosyl-(1->2)-D-xylose	HMDB0041222	C17H30O14	43.4	1.3	1.88521	0.287235		22.0331
5.28_113.0334m/z	113.033	5.28	Uracil	HMDB0000300	C4H4N2O2	43.3	-10.1713	1.24472	10.1901	6.23072	0.620434
14.54_634.4487m/z	634.449	14.54	PE(14:1(9Z)/14:0)	HMDB0008854	C33H64NO8P	43.2	7	4.90525	2.40793	4.45771	1.61978
1.23_537.1930m/z	537.193	1.23	8-Hydroxypinoresinol4-glucoside	HMDB0033282	C26H32O12	43.2	-6.9	1.26954		0.473433	0.574461
5.88_262.1638m/z	262.164	5.88	hydroxyisovaleroylcarnitine	HMDB0062555	C12H23NO5	43	-4.2	2.1416	0.533083	0.252255	0.473302
7.61_540.3299m/z	540.33	7.61	HisLysGlnLys	154947	C23H41N9O6	42.9	8.67716	2.25298	60.2009	2.33517	0.0852441
12.11_494.3234m/z	494.323	12.11	LysoPC(16:1(9Z)/0:0)	HMDB0010383	C24H48NO7P	42.8	-1.50828	12.0466		7.18393	3.74888
13.39_546.3509m/z	546.351	13.39	LysoPC(20:3(5Z,8Z,11Z))	HMDB0010393	C28H52NO7P	42.6	6.96205	1.2012	1.84508	3.69476	2.18861
16.26_716.5512m/z	716.551	16.26	PC(P-18:0/14:1(9Z))	HMDB0011237	C40H78NO7P	42.6	-10.7	8.09549		1.68221
6.76_187.0960m/z	187.096	6.76	5-Butyltetrahydro-2-oxo-3-furancarboxylicacid	HMDB0030992	C9H14O4	42.6	-2.5	1.35132		0.479188	0.360589
5.60_327.0785m/z	327.079	5.6	Asp-Abu-OH	65298	C13H14N2O8	42.5	-11.6384	1.34109			0.66977
12.58_170.0953m/z	170.095	12.58	4-Aminobiphenyl	HMDB0013195	C12H11N	42.4	-6.84622	1.33952		5.49747	3.30584
16.29_848.6284m/z	848.628	16.29	PS(24:0/16:0)	HMDB0112884	C46H90NO10P	42.4	-10.7	2.95737	1.52346
7.64_304.2109m/z	304.211	7.64	3-hydroxyoctanoylcarnitine	HMDB0061634	C15H29NO5	42.3	-3.1	1.11586	0.140939	0.0451599	0.319864
15.03_283.1740m/z	283.174	15.03	Hexaethyleneglycol	HMDB0061822	C12H26O7	42.3	-4.2	1.18378		1.65366
12.47_526.2975m/z	526.298	12.47	LysoPE(22:6(4Z,7Z,10Z,13Z,16Z,19Z)/0:0)	HMDB0011526	C27H44NO7P	42.2	8.9	3.13137		2.6868	2.34324
5.69_192.0851m/z	192.085	5.69	CalystegineC1	HMDB0031346	C7H13NO5	42.1	-7.8	1.06073	0.438894	0.0884117	0.203174
11.91_386.3252m/z	386.325	11.91	Pentadecanoylcarnitine	HMDB0062517	C22H43NO4	42.1	-3.4	1.95662	0.194243	0.0895794	0.454342
13.15_291.1949m/z	291.195	13.15	EcklonialactoneA	65409	C18H26O3	41.9	-1.88596	1.86706		2.77229	2.05864
7.43_561.2686m/z	561.269	7.43	TyrHisLeuGlu	258062	C26H36N6O8	41.9	3.2897	1.10866	1.72824	3.06855	1.78633
11.93_542.3231m/z	542.323	11.93	LeuAlaProLeuGlu	265004	C25H43N5O8	41.9	8.51807	5.6542	2.02898	17.0896	10.0315
13.79_548.3690m/z	548.369	13.79	LysoPC(20:2(11Z,14Z))	HMDB0010392	C28H54NO7P	41.9	-3.8	1.47007		3.80622	7.04732
12.34_542.3205m/z	542.321	12.34	LysoPC(20:5(5Z,8Z,11Z,14Z,17Z))	HMDB0010397	C28H48NO7P	41.9	-6.7	1.30918	5.17192		10.9795
7.32_648.3783m/z	648.378	7.32	NummularineA	HMDB0029336	C36H49N5O6	41.9	4.3	3.19698	53.4237	2.70777	0.122611
13.97_353.1952m/z	353.195	13.97	[4]-Gingerdiol3,5-diacetate	HMDB0039132	C19H28O6	41.9	-2	2.07283	2.0883	2.90346
10.53_388.3046m/z	388.305	10.53	3-hydroxytetradecanoylcarnitine	HMDB0061640	C21H41NO5	41.9	-2.9	1.57462	0.12187	0.0186968	0.152866
15.00_502.3151m/z	502.315	15	ArgAlaGlnLys	215747	C20H39N9O6	41.8	10.9575	2.87284		1.86768
6.31_173.0798m/z	173.08	6.31	2-Octenedioicacid	HMDB0000341	C8H12O4	41.8	-6.257	1.28384		0.567383	0.556343
5.77_366.1327m/z	366.133	5.77	MetSerGlu	22553	C13H23N3O7S	41.7	-0.7873	1.33985	1.58391	2.177
18.85_690.5061m/z	690.506	18.85	PE(16:0/16:1(9Z))	HMDB0008924	C37H72NO8P	41.5	-1.1	1.06306	2.95364	3.29356
1.47_684.1392m/z	684.139	1.47	(6S)-6-beta-hydroxy-1,4,5,6-tetrahydronicotinamide-adeninedinucleotide	HMDB0059644	C21H31N7O15P2	41.4	-5	1.81689	3.67821	2.64834
13.91_572.2942m/z	572.294	13.91	Kinetensin4-7	HMDB0012986	C26H37N9O6	41.3	0.3	1.16067	2.34555	4.76339	2.78165
6.12_740.3540m/z	740.354	6.12	GlabrinD	HMDB0033613	C36H49N7O10	41.3	-10	2.16319	0.535003		25.8786
2.99_379.1273m/z	379.127	2.99	AspAsnMet	19688	C13H22N4O7S	41.2	-2.48307	6.7775	4.13755	3.90528
14.30_854.5787m/z	854.579	14.3	PC(22:6(4Z,7Z,10Z,13Z,16Z,19Z)/20:4(5Z,8Z,11Z,14Z))	HMDB0008739	C50H80NO8P	41.1	10.9	1.90775		2.45222
11.66_442.3504m/z	442.35	11.66	2-Hydroxy-3-methoxyestrone	HMDB0011195	C25H47NO5	41.1	-5.2	2.08528	0.121445	0.0840063
14.65_864.6231m/z	864.623	14.65	3-O-Sulfogalactosylceramide(d18:1/22:0)	HMDB0012316	C46H89NO11S	41	0.2	1.20219		1.53976
10.94_414.3049m/z	414.305	10.94	N-DocosahexaenoylGABA	HMDB0062332	C26H39NO3	40.8	11.2	1.26199	0.569645	0.490572
3.75_248.1481m/z	248.148	3.75	(R)-3-hydroxybutyrylcarnitine	HMDB0062735	C11H21NO5	40.8	-4.6	2.05421	0.27654	0.110552	0.399683
14.84_317.3040m/z	317.304	14.84	1,2,4-Nonadecanetriol	HMDB0032112	C19H40O3	40.7	-3.12554	1.50853	0.0990196	0.0174854	0.218518
11.94_415.2108m/z	415.211	11.94	LysHisMet	17238	C17H30N6O4S	40.6	-3.40957	1.84997		1.67317
6.70_581.3135m/z	581.313	6.7	HordatineB	HMDB0030459	C29H40N8O5	40.6	-10.2	1.01672	0.395209		2.94722
13.81_537.3380m/z	537.338	13.81	TyrValLysLys	262447	C26H44N6O6	40.5	-2.85523	3.61809	109.856	12.1464	0.323854
13.81_508.3749m/z	508.375	13.81	LysoPC(P-18:0)	HMDB0013122	C26H54NO6P	40.5	-2.5	5.43131		0.36016	0.439232
11.82_376.2595m/z	376.26	11.82	LysThrLys	19689	C16H33N5O5	40.4	10.6771	5.57144		1.78875
13.62_539.2595m/z	539.26	13.62	TyrSerAsnArg	261713	C22H34N8O8	40.4	4.20289	1.21492		1.59501
5.63_229.1536m/z	229.154	5.63	ProLeu	23647	C11H20N2O3	40.3	-4.88007	1.10238	0.662333	0.423301	0.63909
13.55_572.3699m/z	572.37	13.55	LeuSerProLysLys	264871	C26H49N7O7	40.3	-11.8536	1.41404		8.57048	7.98599
14.84_742.5378m/z	742.538	14.84	PE(16:0/20:3(5Z,8Z,11Z))	HMDB0008935	C41H76NO8P	40.3	-0.4	3.51618		4.37709
13.76_581.3643m/z	581.364	13.76	IleHisArgArg	162173	C24H44N12O5	39.9	2.23391	3.59188	96.7519	11.6673	0.328577
6.12_292.1016m/z	292.102	6.12	Toyocamycin	96312	C12H13N5O4	39.8	-8.45113	1.83903	0.607123	1.64342	585.051
12.33_602.3388m/z	602.339	12.33	GluGluValLeuIle	264167	C27H47N5O10	39.8	-1.26432	1.10482	2.10068		0.531548
14.64_315.2302m/z	315.23	14.64	Methyldehydroabietate	265055	C21H30O2	39.8	-5.28062	1.17737		9.02375	26.0082
13.34_357.2604m/z	357.26	13.34	13,14-dihydro-PGE1	36193	C20H36O5	39.7	-8.86692	2.39046	0.107486	0.0155757	0.151308
12.61_410.3253m/z	410.325	12.61	PGF2adiethylamide	45673	C24H43NO4	39.7	-2.87664	3.93081	69.7314	9.89209	0.250346
15.30_510.3901m/z	510.39	15.3	2-O-ethylPAFC-16	62939	C26H56NO6P	39.6	-3.31559	2.32799	0.46327	0.335787

## Sheet: RPLC-NEG
Table S4. The key information of 70 differential metabolites obtained by RPLC-NEG analysis mode
Metabolite feature	m/z	RT(min)	Metabolite name	Metabolite ID	Formula	Score	Mass Error(ppm)	VIP	FC(16/DMSO)	FC(32/DMSO)	FC(32/16)
5.06_662.1030m/z	662.103	5.06	Nicotinamideadeninedinucleotide(NAD)	101	C21H27N7O14P2	56.7	1.77549	14.1784		1900.77	1602.39
3.42_166.0508m/z	166.051	3.42	Pyridoxal(VitaminB6)	2203	C8H9NO3	50.2	-1.02768	1.28423		195.849	641.904
5.37_255.0442m/z	255.044	5.37	N1,N4-Diacetylsulfanilamide	2528	C10H12N2O4S	42	-1.04737	1.68245	16.6635	10.2473	0.615923
6.32_385.1394m/z	385.139	6.32	Val-HoPhe-OH	65342	C20H22N2O6	39.7	-2.74814	2.81909	2.07855		0.549981
5.46_447.1550m/z	447.155	5.46	HoPhe-HoPhe-OH	65354	C25H24N2O6	41	-2.48294	1.32413		69.6258	45.0446
6.91_476.1699m/z	476.17	6.91	Pralatrexate	85196	C23H23N7O5	39.6	2.30165	1.60696		25.4008
13.67_564.2391m/z	564.239	13.67	GluArgPheAsp	133162	C24H35N7O9	39.6	-5.82416	1.21772			7.14759
6.09_500.3075m/z	500.308	6.09	IleGluLeuLys	160867	C23H43N5O7	41.4	-2.96949	1.55503	0.389549	0.41265
5.33_134.0472m/z	134.047	5.33	Adenine	HMDB0000034	C5H5N5	43	-0.143974	5.45394	0.332239	0.63405
0.98_426.0213m/z	426.021	0.98	Adenosine3',5'-diphosphate	HMDB0000061	C10H15N5O10P2	48.2	-1.91339	8.56876		4.04626
5.33_266.0896m/z	266.09	5.33	Deoxyguanosine	HMDB0000085	C10H13N5O4	50.6	0.363544	6.96959	0.299651	0.358719
0.77_191.0196m/z	191.02	0.77	Citric acid	HMDB0000094	C6H8O7	46.1	-0.431287	1.48955	0.343104	0.312489
5.77_440.1316m/z	440.132	5.77	Folic acid	HMDB0000121	C19H19N7O6	46.1	-1.79088	3.84157		59.6134	320.312
0.77_132.0303m/z	132.03	0.77	L-Asparticacid	HMDB0000191	C4H7NO4	52.4	0.201264	3.17175	3.60549	2.7941
4.92_267.0732m/z	267.073	4.92	Inosine	HMDB0000195	C10H12N4O5	47.8	-1.10194	2.54591		69.2119	150.024
5.18_218.1037m/z	218.104	5.18	Pantothenicacid	HMDB0000210	C9H17NO5	50.2	1.33399	15.8758		2373.83	960.078
0.95_323.0282m/z	323.028	0.95	Uridine5'-monophosphate	HMDB0000288	C9H13N2O9P	47.3	-1.35841	4.40346		15.919	5.27191
2.57_243.0623m/z	243.062	2.57	Uridine	HMDB0000296	C9H12N2O6	51.7	0.277246	3.36979		2.21171	1.87928
2.50_283.0678m/z	283.068	2.5	Xanthosine	HMDB0000299	C10H12N4O6	48.7	-1.99027	1.22735	0.399907	0.0213142	0.0506763
10.01_163.0762m/z	163.076	10.01	2-Phenylbutyricacid	HMDB0000329	C10H12O2	50.8	-1.43123	1.36083		2.45622
11.16_215.1651m/z	215.165	11.16	3-Hydroxydodecanoicacid	HMDB0000387	C12H24O3	58.1	-0.787872	1.34296	0.162652	0.0758702
0.87_505.9876m/z	505.988	0.87	Adenosinetriphosphate	HMDB0000538	C10H16N5O13P3	48.9	-1.6519	4.34747		10.2904
5.67_293.1125m/z	293.113	5.67	gamma-Glutamylphenylalanine	HMDB0000594	C14H18N2O5	51.4	-6.01025	1.22999		60.2704	18.2809
2.44_181.0502m/z	181.05	2.44	Hydroxyphenyllacticacid	HMDB0000755	C9H10O4	52.8	-2.57938	1.14464	0.467952	0.00474982	0.0105295
6.30_192.0669m/z	192.067	6.3	Phenylacetylglycine	HMDB0000821	C10H11NO3	45.7	1.34069	13.6532	2.03034
5.24_330.0606m/z	330.061	5.24	Deoxyadenosinemonophosphate	HMDB0000905	C10H14N5O6P	40.3	-0.780816	1.28614		35.8416	283.469
14.74_303.2324m/z	303.232	14.74	Arachidonicacid	HMDB0001043	C20H32O2	46.3	-1.69442	1.37525		4.4816	6.43378
2.75_166.0507m/z	166.051	2.75	Pyridoxal	HMDB0001545	C8H9NO3	50.6	-1.40782	1.47214		0.00975388	0.00909492
14.13_301.2166m/z	301.217	14.13	Eicosapentaenoicacid	HMDB0001999	C20H30O2	45.6	-2.23658	1.25402		5.44595	6.46595
6.72_377.1918m/z	377.192	6.72	Pentosidine	HMDB0003933	C17H26N6O4	40.2	-6.63769	1.10941	1.94337		0.526222
8.80_311.0556m/z	311.056	8.8	AflatoxinB1	HMDB0006552	C17H12O6	54.7	-1.51002	3.11419	-2.51235e+07	-1.67234e+07
8.01_730.4519m/z	730.452	8.01	PE(18:4(6Z,9Z,12Z,15Z)/18:4(6Z,9Z,12Z,15Z))	HMDB0009195	C41H66NO8P	41.2	8.94168	2.74366	0.324959	0.0719499	0.221298
12.06_480.3085m/z	480.308	12.06	LysoPC(15:0)	HMDB0010381	C23H48NO7P	46.7	-2.17472	2.21324		2.22919	3.68826
13.29_480.3093m/z	480.309	13.29	LysoPE(0:0/18:0)	HMDB0011129	C23H48NO7P	46.8	-0.475101	4.2576		4.75091	8.56211
5.28_259.1293m/z	259.129	5.28	gamma-Glutamylleucine	HMDB0011171	C11H20N2O5	54.8	-2.62237	1.64811		3487.87	-1.70301e+08
11.40_476.2774m/z	476.277	11.4	LysoPE(0:0/18:2(9Z,12Z))	HMDB0011477	C23H44NO7P	46.7	-1.78418	1.3748	0.315702	4.26182	13.5423
11.00_474.2614m/z	474.261	11	LysoPE(0:0/18:3(6Z,9Z,12Z))	HMDB0011478	C23H42NO7P	47.7	-2.55995	1.19452	0.175608		16.227
10.89_452.2770m/z	452.277	10.89	LysoPE(16:0/0:0)	HMDB0011503	C21H44NO7P	42.6	-2.6886	1.80421		2.86384	5.28759
10.24_478.2926m/z	478.293	10.24	LysoPE(18:1(9Z)/0:0)	HMDB0011506	C23H46NO7P	41.8	-2.79734	1.35838	0.596923
11.46_500.2776m/z	500.278	11.46	LysoPE(20:4(5Z,8Z,11Z,14Z)/0:0)	HMDB0011517	C25H44NO7P	45.9	-1.42025	3.1609		7.46539	13.7856
11.06_498.2621m/z	498.262	11.06	LysoPE(20:5(5Z,8Z,11Z,14Z,17Z)/0:0)	HMDB0011519	C25H42NO7P	48.4	-1.10206	4.8047		9.3704	12.1209
2.61_190.0537m/z	190.054	2.61	N-Acetyl-L-methionine	HMDB0011745	C7H13NO3S	53.8	-3.248	1.24006	2.26454	0.000538161	0.000239384
6.09_277.1551m/z	277.155	6.09	Leucyl-phenylalanine	HMDB0013243	C15H22N2O3	43.3	-2.5251	1.02763			0.503922
13.40_284.2224m/z	284.222	13.4	Myristoylglycine	HMDB0013250	C16H31NO3	44.3	-2.59868	1.21528	0.32343	0.147178	0.454079
5.13_292.1300m/z	292.13	5.13	Glutaminylphenylalanine	HMDB0028804	C14H19N3O4	49.4	-0.87631	2.14778	1.80309
3.52_258.1816m/z	258.182	3.52	Isoleucyl-Lysine	HMDB0028912	C12H25N3O3	47.4	-2.57064	1.26901	1.78686	0.163005	0.0957807
5.54_392.1125m/z	392.113	5.54	gamma-L-Glutamyl-S-(2-carboxy-1-propyl)cysteinylglycine	HMDB0029394	C14H23N3O8S	52.8	-2.17507	1.68832		1176.03	982.187
5.51_176.0385m/z	176.038	5.51	Cycloalliin	HMDB0029417	C6H11NO3S	53.5	-1.29323	1.13721		2.66326e+07	1010.66
0.96_133.0504m/z	133.05	0.96	2,3-Dihydroxy-2-methylbutanoicacid	HMDB0029576	C5H10O4	55	-1.86325	1.58289	0.140636	0.0519685
0.87_367.1052m/z	367.105	0.87	3-O-Feruloylquinicacid	HMDB0030669	C17H20O9	50.7	4.83549	2.65048		1.67383	1.76309
2.88_94.9804m/z	94.9804	2.88	Silicicacid	HMDB0031436	H4O4Si	46.5	-2.45584	1.11622		0.0881219	0.080432
2.60_150.0560m/z	150.056	2.6	3alpha,4,7,7alpha-Tetrahydro-1H-isoindole-1,3(2H)-dione	HMDB0033903	C8H9NO2	50.4	-0.591966	2.46639		0.000318545	0.000248998
3.39_168.0666m/z	168.067	3.39	6-Acetyl-2,3-dihydro-2-(hydroxymethyl)-4(1H)-pyridinone	HMDB0035178	C8H11NO3	52.8	0.0319074	2.70795			560.627
10.43_293.1756m/z	293.176	10.43	TanacetolA	HMDB0035722	C17H26O4	49	-0.871417	2.5035		2.97511	2.15347
7.22_629.3515m/z	629.351	7.22	GoshonosideF7	HMDB0038378	C32H54O12	44.2	-4.37628	1.3813		1.78404
5.56_407.1718m/z	407.172	5.56	3-O-MethylniveusinA	HMDB0039084	C21H28O8	40.6	1.59627	4.56968	1.68452
0.84_313.1118m/z	313.112	0.84	6-Hydroxyenterolactone	HMDB0041700	C18H18O5	40.6	11.5996	1.15632	2.34807	4.41363
7.35_437.0858m/z	437.086	7.35	Riboflavincyclic-4',5'-phosphate	HMDB0059614	C17H19N4O8P	46.2	-2.16609	1.96783		0.513232
5.62_682.1284m/z	682.128	5.62	(6S)-6-beta-hydroxy-1,4,5,6-tetrahydronicotinamide-adeninedinucleotide	HMDB0059644	C21H31N7O15P2	43.3	0.520084	2.70245		7.30655e+07	1.28427e+08
5.65_203.0023m/z	203.002	5.65	O-methoxycatechol-O-sulphate	HMDB0060013	C7H8O5S	48.1	1.41992	5.03835		3.22895e+07	7.54888e+06
6.69_172.9910m/z	172.991	6.69	Phenolsulphate	HMDB0060015	C6H6O4S	54.2	-2.18302	2.51307			18006.4
7.61_351.1011m/z	351.101	7.61	Penicilloicacid	HMDB0060617	C16H20N2O5S	43.5	-2.58294	2.59571		3.04166
12.63_466.2927m/z	466.293	12.63	1-Heptadecanoylglycerophosphoethanolamine	HMDB0061691	C22H46NO7P	45.7	-2.58463	1.25946		11.9742	17.9449
7.44_236.0931m/z	236.093	7.44	N-lactoyl-Phenylalanine	HMDB0062175	C12H15NO4	49.6	1.08883	2.53357		0.465356	0.494284
6.80_202.1086m/z	202.109	6.8	N-lactoyl-Leucine	HMDB0062176	C9H17NO4	49.5	0.648985	3.91273	1.58104		0.494656
11.38_830.5916m/z	830.592	11.38	PS(15:0/24:1(15Z))	HMDB0112341	C45H86NO10P	48.8	-0.0235898	3.83191	2.4563
7.08_725.1936m/z	725.194	7.08	6-[(2-{4-[(3-{[3,4-dihydroxy-4-(hydroxymethyl)oxolan-2-yl]oxy}-4,5-dihydroxy-6-(hydroxymethyl)oxan-2-yl)oxy]phenyl}-4-oxo-3,4-dihydro-2H-1-benzopyran-7-yl)oxy]-3,4,5-trihydroxyoxane-2-carboxylicacid	HMDB0124935	C32H38O19	41.4	0.209219	1.14277		16.3506
9.43_371.0588m/z	371.059	9.43	6-{[3-(3,4-dihydroxyphenyl)-2-oxopropanoyl]oxy}-3,4,5-trihydroxyoxane-2-carboxylicacid	HMDB0125449	C15H16O11	41.9	-8.55754	4.26582		0.482532	0.644585
0.87_277.0729m/z	277.073	0.87	8-(1,2-dihydroxypropan-2-yl)-9-hydroxy-2H,8H,9H-furo[2,3-h]chromen-2-one	HMDB0128947	C14H14O6	46.6	4.10072	1.22686		3.29356	2.16107
8.63_578.1606m/z	578.161	8.63	5,7-dihydroxy-2-(4-hydroxyphenyl)-3-[(3,4,5-trihydroxy-6-{[(3,4,5-trihydroxy-6-methyloxan-2-yl)oxy]methyl}oxan-2-yl)oxy]-1Î»â´-chromen-1-ylium	HMDB0140837	C27H31O14+	40.9	-6.08887	1.29291	15.253

## Sheet: HILIC-POS
Table S4. The key information of 107 differential metabolites obtained by HILIC-POS analysis mode
Metabolite feature	m/z	RT(min)	Metabolite name	Metabolite ID	Formula	Score	Mass Error(ppm)	VIP	FC(16/DMSO)	FC(32/DMSO)	FC(32/16)
3.02_205.0965m/z	205.096	3.02	DL-Tryptophan	65534	C11H12N2O2	58.3	-3.32877	2.05602	1.58921
13.54_744.0816m/z	744.082	13.54	NicotinamideAdenineDinucleotidePhosphate(NADP+)	102	C21H28N7O17P3	57.7	-1.4681	1.71513	1.74949		0.556322
1.34_152.0698m/z	152.07	1.34	2-Amino-3-methylbenzoate	HMDB0060680	C8H9NO2	57.3	-5.18075	1.81602	1.57926
3.02_146.0591m/z	146.059	3.02	4-formylIndole	96392	C9H7NO	56.2	-6.71235	1.11552	1.49509
14.17_484.9758m/z	484.976	14.17	Uridinetriphosphate	HMDB0000285	C9H15N2O15P3	56	-0.0563752	3.44541	4.02792	3.17626
11.99_399.1428m/z	399.143	11.99	S-Adenosylmethionine	3289	C15H22N6O5S	55.8	-4.34644	1.19799	1.60005	2.83697	1.77148
4.65_265.1118m/z	265.112	4.65	Thiamine	229	C12H16N4OS	55.7	0.339035	3.48736		1.73346
0.73_261.1477m/z	261.148	0.73	5-methyl-5-(4-methylpent-3-en-1-yl)-3,6-dioxatricyclo[5.4.0.0Â²,â´]undeca-1(7),8,10-trien-8-ol	HMDB0134728	C16H20O3	55.7	-3.02307	1.01998	0.373189
13.70_424.1015m/z	424.101	13.7	S-(1,2-DICARBOXYETHYL)GLUTATHIONE	44314	C14H21N3O10S	55.6	-1.35481	2.00774		0.549266	0.360861
9.51_88.0384m/z	88.0384	9.51	2-Aminoacrylicacid	HMDB0003609	C3H5NO2	55.4	-10.3922	1.41055	4.6484	3.40279
3.38_284.0981m/z	284.098	3.38	Guanosine	HMDB0000133	C10H13N5O5	54.8	-2.93966	1.53784	0.181748	0.146349
11.57_184.0732m/z	184.073	11.57	Phosphocholine	3318	C5H14NO4P	54.4	-0.815472	16.84	2.39025	2.91667
8.11_156.0759m/z	156.076	8.11	L-2-Amino-3-(1-pyrazolyl)propanoicacid	HMDB0034267	C6H9N3O2	54.3	-5.54841	2.186		1.96852
8.41_282.1180m/z	282.118	8.41	N-(1-Deoxy-1-fructosyl)threonine	HMDB0037843	C11H15N5O4	53.9	-5.87427	1.05721		0.567374	0.65955
13.79_508.0024m/z	508.002	13.79	Adenosinetriphosphate	HMDB0000538	C10H16N5O13P3	53.5	-1.16617	7.635	2.18882		0.529174
9.51_134.0439m/z	134.044	9.51	D-Asparticacid	HMDB0006483	C4H7NO4	53.4	-6.46326	1.82452	2.52216	2.06765
1.32_502.2909m/z	502.291	1.32	LysoPE(0:0/20:4(8Z,11Z,14Z,17Z))	HMDB0011488	C32H39NO4	53	-8.56092	1.34386		4.36006	5.9706
9.61_262.1502m/z	262.15	9.61	Serylarginine	HMDB0029033	C9H19N5O4	53	-2.81972	1.00758		1.53559	1.53652
0.75_401.3403m/z	401.34	0.75	25-Hydroxytachysterol3	HMDB0006722	C27H44O2	52.9	-2.87933	2.09044	0.575066
9.95_384.1147m/z	384.115	9.95	Succinyladenosine	HMDB0000912	C14H17N5O8	52.8	-0.876503	2.52778	0.399679	0.341314
3.19_222.0961m/z	222.096	3.19	N-Acetylmannosamine	HMDB0001129	C8H15NO6	52.7	-5.03016	1.20578	0.197216	0.357297	1.82028
7.48_147.0764m/z	147.076	7.48	D-Glutamine	HMDB0003423	C5H10N2O3	52.7	-0.403601	2.37936	1.52695	1.51139
11.11_489.1140m/z	489.114	11.11	Citicoline	HMDB0001413	C14H26N4O11P2	52.5	-1.2893	2.43394	1.92382	1.91194
11.29_223.0746m/z	223.075	11.29	L-Cystathionine	HMDB0000099	C7H14N2O4S	52.4	-0.580566	3.53829		0.202695	0.280109
6.60_288.2023m/z	288.202	6.6	Isoleucyl-Arginine	HMDB0028901	C12H25N5O3	52.4	-2.46445	2.76749		4.02947	3.20356
3.72_218.1385m/z	218.138	3.72	(±)-Propionylcarnitine	85176	C10H19NO4	51.7	-1.02932	4.70797	0.513876	0.10527	0.205699
8.17_310.1130m/z	310.113	8.17	N-Acetylneuraminicacid	HMDB0000230	C11H19NO9	51.7	-0.7138	2.16285		0.458016	0.608201
3.38_152.0558m/z	152.056	3.38	2-Hydroxyadenine	HMDB0000403	C5H5N5O	51.7	-5.72529	1.84362	0.195991	0.15563
13.03_427.0942m/z	427.094	13.03	Cysteineglutathionedisulfide	HMDB0000656	C13H22N4O8S2	51.7	-2.31437	2.18023	0.346322
11.06_608.0886m/z	608.089	11.06	UDP-N-acetyl-D-mannosamine	HMDB0013112	C17H27N3O17P2	51.7	-0.357496	8.23834	0.474214	0.330359
1.19_372.3096m/z	372.31	1.19	(±)-Myristoylcarnitine	85175	C21H41NO4	51.5	-3.34026	1.52414	0.243963	0.0208393	0.086552
1.83_268.1041m/z	268.104	1.83	Adenosine	HMDB0000050	C10H13N5O4	51.5	0.447878	7.07578	0.140165	0.13124
1.26_520.3376m/z	520.338	1.26	LysoPC(18:2(9Z,12Z))	HMDB0010386	C26H50NO7P	51.5	-4.26353	3.02439			5.31468
7.55_146.1171m/z	146.117	7.55	3-Dehydroxycarnitine	HMDB0006831	C7H15NO2	51.2	-2.89071	1.87438	0.570138	0.327861	0.575156
8.24_342.1381m/z	342.138	8.24	6-(alpha-D-Glucosaminyl)-1D-myo-inositol	HMDB0011668	C13H19N5O6	51.2	-8.00026	1.25298		0.577033
9.98_666.1316m/z	666.132	9.98	NADH	HMDB0001487	C21H29N7O14P2	51.1	-0.641981	4.85713			0.280462
0.75_838.5577m/z	838.558	0.75	PE(DiMe(11,3)/MonoMe(11,5))	HMDB0061477	C46H80NO10P	51.1	-1.8157	2.04797		2.56061	2.4854
11.51_615.1532m/z	615.153	11.51	CytidinemonophosphateN-acetylneuraminicacid	HMDB0001176	C20H31N4O16P	51	-2.17199	1.70436	0.378004	0.229466	0.607114
11.00_364.0642m/z	364.064	11	Guanosinemonophosphate	HMDB0001397	C10H14N5O8P	50.9	-3.07323	1.09326		2.56781	3.54711
8.29_112.9989m/z	112.999	8.29	Methylphosphate	HMDB0061711	CH5O4P	50.9	-8.17442	1.15717	0.299657	0.221586
7.70_160.1330m/z	160.133	7.7	METHACHOLINE	43545	C8H17NO2	50.7	-1.40946	3.3686	0.557812	0.200576	0.35968
2.40_246.1699m/z	246.17	2.4	2-Methylbutyroylcarnitine	HMDB0000378	C12H23NO4	50.7	-0.366295	5.82081		0.407641	0.301025
10.80_560.0770m/z	560.077	10.8	Adenosinediphosphateribose	HMDB0001178	C15H23N5O14P2	50.7	-3.51403	1.2744		14.1252	8.00518
10.77_170.0565m/z	170.056	10.77	Phosphodimethylethanolamine	HMDB0060244	C4H12NO4P	50.5	-6.99882	1.18961	4.08191	4.08011
2.47_104.1068m/z	104.107	2.47	Choline	56	C5H13NO	50.4	-1.88741	3.55819		1.50613
1.23_544.3373m/z	544.337	1.23	LysoPC(20:4(5Z,8Z,11Z,14Z))	HMDB0010395	C28H50NO7P	50.3	-4.59036	2.51982		4.42659	5.80147
4.76_116.0703m/z	116.07	4.76	D-Proline	HMDB0003411	C5H9NO2	50.2	-2.97711	2.48377		0.624319	0.601479
2.89_232.1545m/z	232.155	2.89	Butyrylcarnitine	HMDB0002013	C11H21NO4	49.8	0.611205	6.4969		0.415409	0.417627
0.81_313.0706m/z	313.071	0.81	AflatoxinB1	HMDB0006552	C17H12O6	49.6	-0.324674	2.92292	-1.96038e+08	-1.48496e+08
3.78_137.0705m/z	137.071	3.78	2-Methylnicotinamide	HMDB0059711	C7H8N2O	49.6	-3.20121	3.8417	7.19868	12.7276	1.77348
1.25_542.3221m/z	542.322	1.25	LysoPC(20:5(5Z,8Z,11Z,14Z,17Z))	HMDB0010397	C25H43N5O8	49.4	6.82172	1.56724		9.79326	7.28884
3.02_188.0704m/z	188.07	3.02	Indoleacrylicacid	HMDB0000734	C11H9NO2	49.3	-1.24512	3.74538	1.53264
1.96_260.1850m/z	260.185	1.96	L-Hexanoylcarnitine	HMDB0000756	C13H25NO4	49.3	-2.30588	1.68731		0.249602	0.280385
8.32_216.0630m/z	216.063	8.32	sn-glycero-3-Phosphoethanolamine	HMDB0059660	C5H14NO6P	49.3	-0.842178	1.62098		0.476413	0.598393
1.34_468.3072m/z	468.307	1.34	LysoPC(14:0/0:0)	HMDB0010379	C22H46NO7P	49	-2.69828	1.45566			2.69693
8.63_361.1821m/z	361.182	8.63	GlyGluArg	21169	C13H24N6O6	48.9	-2.51613	1.16288	0.547636	0.406847
1.15_426.3561m/z	426.356	1.15	Oleoylcarnitine	HMDB0005065	C25H47NO4	48.9	-4.04265	1.22225	0.109728	0.0231258	0.213071
2.42_137.0447m/z	137.045	2.42	Allopurinol	HMDB0014581	C5H4N4O	48.9	-8.15619	1.38318	0.630351	0.0898476	0.142645
3.69_335.1056m/z	335.106	3.69	PenicillinG	HMDB0015186	C16H18N2O4S	48.8	-1.17168	3.65581		2.80133
11.80_305.0967m/z	305.097	11.8	N-Acetylaspartylglutamicacid	HMDB0001067	C11H16N2O8	48.2	-3.97934	0.975753		0.390504	0.494798
12.18_291.1296m/z	291.13	12.18	Argininosuccinicacid	HMDB0000052	C10H18N4O6	48.1	-1.00615	2.16345	1.95753		0.470084
1.22_524.3667m/z	524.367	1.22	LysoPC(18:0)	HMDB0010384	C26H54NO7P	48.1	-8.35048	2.51989	0.364543
8.11_110.0705m/z	110.07	8.11	4-PyrimidineMethanamine(hydrochloride)	45035	C5H7N3	48	-7.19939	1.47348		2.01445
10.67_276.1181m/z	276.118	10.67	Glutamylglutamine	HMDB0028817	C10H17N3O6	48	-3.41973	0.981707	0.440043		1.8845
4.76_204.1229m/z	204.123	4.76	L-Acetylcarnitine	HMDB0000201	C9H17NO4	47.8	-0.604552	4.46851	0.451718	0.191817
0.89_496.3382m/z	496.338	0.89	LysoPC(0:0/16:0)	HMDB0240262	C24H50NO7P	47.4	-3.12574	2.50117			2.08684
14.39_523.9968m/z	523.997	14.39	Guanosinetriphosphate	HMDB0001273	C10H16N5O14P3	47.2	-2.2576	1.80935	1.77836
10.94_357.2487m/z	357.249	10.94	IleProLys	16048	C17H32N4O4	47.1	-2.56042	1.06754	1.67672
11.11_293.0972m/z	293.097	11.11	EdeticAcid	HMDB0015109	C10H16N2O8	47.1	-2.54347	1.50494	0.287951	0.236838
6.90_754.5345m/z	754.534	6.9	PC(14:0/20:4(5Z,8Z,11Z,14Z))	HMDB0007883	C42H76NO8P	47	-4.77377	1.3669		0.169542
0.89_724.5252m/z	724.525	0.89	PE(P-16:0/20:4(8Z,11Z,14Z,17Z))	HMDB0011353	C41H74NO7P	46.9	-3.3024	2.8		2.43826	2.93306
0.85_816.5916m/z	816.592	0.85	PC(22:6(4Z,7Z,10Z,13Z,16Z,19Z)/P-18:1(11Z))	HMDB0008753	C48H82NO7P	46.7	1.80052	1.70783	0.593543
8.08_361.2062m/z	361.206	8.08	GlnThrIle	18797	C15H28N4O6	46.4	-5.35533	1.20147	0.341766	0.170875
9.61_203.1498m/z	203.15	9.61	Symmetricdimethylarginine	HMDB0003334	C8H18N4O2	46.4	-2.04317	2.31972		0.549265
1.22_568.3374m/z	568.337	1.22	LysoPC(22:6(4Z,7Z,10Z,13Z,16Z,19Z))	HMDB0010404	C30H50NO7P	46.4	-4.16156	1.08951		3.7231	4.54852
11.06_204.0862m/z	204.086	11.06	N-acetyl-L-2-aminoadipate(2-)	HMDB0062715	C8H13NO5	46.3	-2.07086	2.27036	0.446885	0.288441	0.645466
0.81_840.5681m/z	840.568	0.81	PS(22:0/18:4(6Z,9Z,12Z,15Z))	HMDB0112718	C46H82NO10P	45.9	-8.07238	3.02081		3.27934
11.35_491.2092m/z	491.209	11.35	Cymorcindiglucoside	HMDB0039386	C18H30N6O10	45.6	-0.807633	2.48925		0.459848	0.510445
1.22_570.3534m/z	570.353	1.22	LysoPC(22:5(4Z,7Z,10Z,13Z,16Z))	HMDB0010402	C30H52NO7P	45.5	-3.57222	1.31926		4.75455	5.438
6.97_766.5680m/z	766.568	6.97	2-O-(5,8,11,14,17-Eicosapentaenoyl)-1-O-hexadecylglycero-3-phosphocholine	HMDB0039528	C44H80NO7P	45.3	-8.47887	1.36774		0.122741
6.90_808.5812m/z	808.581	6.9	PC(18:1(11Z)/20:4(8Z,11Z,14Z,17Z))	HMDB0008082	C46H82NO8P	44.9	-4.829	3.22153		0.133853
7.80_537.1934m/z	537.193	7.8	8-Hydroxypinoresinol4-glucoside	HMDB0033282	C26H32O12	44.8	-6.10541	2.98627		1.6756
7.20_247.0577m/z	247.058	7.2	CoriandroneC	HMDB0041525	C13H10O5	44.6	-9.73988	1.48347		0.550359
14.34_483.9909m/z	483.991	14.34	Cytidinetriphosphate	HMDB0000082	C9H16N3O14P3	44.4	-1.91564	1.83829	3.3839	2.79408
13.63_404.0240m/z	404.024	13.63	CDP	HMDB0001546	C9H15N3O11P2	44.3	-3.65401	1.21992	1.98918
0.89_703.5732m/z	703.573	0.89	SM(d18:0/16:1(9Z))	HMDB0013464	C39H79N2O6P	44.2	-2.41075	5.70413		2.32777	2.16776
7.49_130.0498m/z	130.05	7.49	Pyroglutamicacid	HMDB0000267	C5H7NO3	44.1	-0.776318	3.37826	1.52542	1.55114
13.57_876.4303m/z	876.43	13.57	Gliadorphin	HMDB0059786	C43H57N9O11	43.9	5.98149	2.57276		0.184655	0.222642
0.73_884.5416m/z	884.542	0.73	PS(22:4(7Z,10Z,13Z,16Z)/22:6(4Z,7Z,10Z,13Z,16Z,19Z))	HMDB0116782	C50H78NO10P	43.6	-2.27258	2.75874		26.7842	12.9574
0.73_391.2839m/z	391.284	0.73	D8'-MerulinicacidA	HMDB0041454	C24H38O4	43.2	-1.04421	4.37191	0.469439
10.41_379.1281m/z	379.128	10.41	AspAsnMet	19688	C13H22N4O7S	43	-0.148329	5.81496		1.80408
6.95_768.5829m/z	768.583	6.95	PC(o-16:0/20:4(8Z,11Z,14Z,17Z))	HMDB0013407	C44H82NO7P	42.7	-9.40695	2.21162		0.105269
8.11_365.1055m/z	365.106	8.11	Ser-His-OH	65203	C15H16N4O7	42.6	-10.2135	4.84985		1.95791	1.67419
8.17_292.1024m/z	292.102	8.17	Toyocamycin	96312	C12H13N5O4	42.2	-5.75128	1.90362		0.457881	0.609091
7.80_296.0649m/z	296.065	7.8	5-Aminoimidazoleribonucleotide	HMDB0001235	C8H14N3O7P	42.1	2.22185	1.03718	2.22105	3.75692	1.70292
12.89_405.0093m/z	405.009	12.89	Uridine5'-diphosphate	HMDB0000295	C9H14N2O12P2	41.8	-0.332742	2.8229	2.44511
0.89_706.5385m/z	706.538	0.89	PC(14:0/16:0)	HMDB0007869	C38H76NO8P	41.8	0.480332	3.56509		2.03369
0.88_758.5697m/z	758.57	0.88	PC(18:2(9Z,12Z)/16:0)	HMDB0008133	C42H80NO8P	41.2	0.382471	7.50902		1.83172	1.80956
6.90_740.5536m/z	740.554	6.9	PC(P-16:0/18:3(6Z,9Z,12Z))	HMDB0011212	C42H78NO7P	40.9	-7.16549	1.27225		0.0853277
1.20_480.3428m/z	480.343	1.2	LysoPC(P-16:0)	HMDB0010407	C24H50NO6P	40.8	-4.29349	1.12745	0.384487
11.88_262.0493m/z	262.049	11.88	O-Phosphotyrosine	HMDB0006049	C9H12NO6P	40.7	7.05766	1.15015	1.91141	2.18124
0.85_834.5990m/z	834.599	0.85	PC(18:0/22:6(4Z,7Z,10Z,13Z,16Z,19Z))	HMDB0008057	C48H84NO8P	40.5	-2.10354	3.64877		3.17252	2.7368
0.85_832.5843m/z	832.584	0.85	PC(18:1(11Z)/22:6(4Z,7Z,10Z,13Z,16Z,19Z))	HMDB0008090	C48H82NO8P	40.2	-0.890072	2.51004		2.06028	2.06205
0.73_279.1583m/z	279.158	0.73	2-[(3,3-dimethyloxiran-2-yl)methyl]-4-(3-methylbut-2-en-1-yl)benzene-1,3,5-triol	HMDB0133048	C16H22O4	40.2	-2.97877	1.52887	0.406221
0.85_856.5821m/z	856.582	0.85	PC(20:4(5Z,8Z,11Z,14Z)/22:5(4Z,7Z,10Z,13Z,16Z))	HMDB0008450	C50H82NO8P	40.1	-3.5254	2.07907		5.76023	3.52725
0.86_782.5691m/z	782.569	0.86	PC(16:0/20:4(5Z,8Z,11Z,14Z))	HMDB0007982	C44H80NO8P	40	-0.42269	6.34204		3.71014	3.80211
0.75_385.2732m/z	385.273	0.75	Persicachrome	HMDB0036425	C25H36O3	40	-1.30247	1.40951		5.26012	4.21516

## Sheet: HILIC-NEG
Table S4. The key information of 120 differential metabolites obtained by HILIC-NEG analysis mode
Metabolite feature	m/z	RT(min)	Metabolite name	Metabolite ID	Formula	Score	Mass Error(ppm)	VIP	FC(16/DMSO)	FC(32/DMSO)	FC(32/16)
13.75_742.0681m/z	742.068	13.75	NicotinamideAdenineDinucleotidePhosphate(NADP+)	102	C21H28N7O17P3	58	-0.108587	1.58621	2.36216		0.640123
0.92_720.4974m/z	720.497	0.92	PE(20:5(5Z,8Z,11Z,14Z,17Z)/P-16:0)	HMDB0009477	C41H72NO7P	57.7	0.0301141	2.56368		2.22821	3.2729
3.41_203.0826m/z	203.083	3.41	L-Tryptophan	HMDB0000929	C11H12N2O2	57.2	0.231658	3.71874	1.52992	1.81491
8.16_179.0563m/z	179.056	8.16	myo-Inositol	144	C6H12O6	57.1	0.993235	3.308	0.653567	0.597827
11.56_259.0224m/z	259.022	11.56	D-fructose1-phosphate	HMDB0060467	C6H13O9P	57	-0.277392	2.46266		0.575669
3.83_146.0455m/z	146.046	3.83	L-Glutamicacid	HMDB0000148	C5H9NO4	56.1	-2.27665	1.34788	0.29228	0.108744	0.368447
3.19_160.0614m/z	160.061	3.19	N-methyl-L-glutamicAcid	HMDB0062660	C6H11NO4	56.1	-0.919533	1.18669	0.22473	0.0518463	0.237636
3.38_164.0718m/z	164.072	3.38	L-Phenylalanine	HMDB0000159	C9H11NO2	56	0.538374	4.6152		1.81909
6.63_130.0511m/z	130.051	6.63	Trans-4-Hydroxy-L-proline	257	C5H9NO3	55.9	0.943765	1.44667		0.462953	0.476382
10.02_346.0558m/z	346.056	10.02	Adenosinemonophosphate	34478	C10H14N5O7P	55.9	0.0957898	5.04247	0.51578
0.78_211.1338m/z	211.134	0.78	Dihydrojasmonicacid	HMDB0033601	C12H20O3	55.8	-0.619616	1.71211		2.02872	1.49219
11.35_402.9936m/z	402.994	11.35	Uridinediphosphate(UDP)	97	C9H14N2O12P2	55.1	-3.16348	2.48396	0.550492	0.305277	0.559283
7.44_258.1822m/z	258.182	7.44	Isoleucyl-Lysine	HMDB0028912	C12H25N3O3	55.1	-0.502895	2.48839		0.43624	0.340301
11.82_168.0431m/z	168.043	11.82	Phosphodimethylethanolamine	HMDB0060244	C4H12NO4P	55.1	-0.193286	5.19186	4.04619	5.29256
3.73_179.0559m/z	179.056	3.73	Beta-D-Glucose	HMDB0000516	C6H12O6	55	-1.1145	3.48946	1.61972
11.58_221.0602m/z	221.06	11.58	L-Cystathionine	HMDB0000099	C7H14N2O4S	54.8	0.0162216	4.09709		0.284714	0.357244
8.16_239.0769m/z	239.077	8.16	D-glycero-L-galacto-Octulose	HMDB0029954	C8H16O8	54.7	-1.56673	1.36963	0.628216	0.565743
11.71_289.0325m/z	289.033	11.71	Sedoheptulose1-phosphate	HMDB0060509	C7H15O10P	54.7	-1.87288	1.38828	0.571311
4.39_160.0613m/z	160.061	4.39	hydroxybutyrylglycine	HMDB0094716	C6H11NO4	54.7	-1.69058	1.22416		0.266784	0.272264
0.82_285.0762m/z	285.076	0.82	Asperxanthone	HMDB0030852	C16H14O5	54.6	-2.29991	1.60462		1.23043e+08
8.52_308.0988m/z	308.099	8.52	N-Acetylneuraminicacid	HMDB0000230	C11H19NO9	54.4	0.469344	7.5491		0.464952	0.592933
1.26_812.5432m/z	812.543	1.26	PS(20:3(8Z,11Z,14Z)/18:0)	HMDB0012422	C44H80NO10P	54.4	-1.89965	1.15057			15.8275
1.17_840.5757m/z	840.576	1.17	PS(20:0/20:3(5Z,8Z,11Z))	HMDB0112526	C46H84NO10P	54.3	-0.357175	1.97419		5.37059
2.68_166.0176m/z	166.018	2.68	N-Acetyltaurine	HMDB0240253	C4H9NO4S	54.3	-2.15701	1.82656	0.269066	0.111143
9.84_132.0305m/z	132.03	9.84	L-Asparticacid	HMDB0000191	C4H7NO4	54.1	1.71844	3.45851	2.63223	2.94913
4.20_218.1036m/z	218.104	4.2	Pantothenicacid	HMDB0000210	C9H17NO5	54.1	1.07219	7.71475		0.513073	0.481002
3.38_147.0449m/z	147.045	3.38	Cinnamicacid	HMDB0000567	C9H8O2	54.1	-1.66396	1.85209		1.6808
8.67_214.0489m/z	214.049	8.67	sn-glycero-3-Phosphoethanolamine	HMDB0059660	C5H14NO6P	54	1.31561	4.11722		0.523783
10.21_176.9357m/z	176.936	10.21	Pyrophosphate	HMDB0000250	H4O7P2	53.9	-1.14128	1.56832		0.489568	0.582796
12.04_303.0833m/z	303.083	12.04	N-Acetylaspartylglutamicacid	HMDB0001067	C11H16N2O8	53.8	-0.434011	4.62972	0.647983	0.353886	0.545681
3.64_190.0720m/z	190.072	3.64	CalystegineC1	HMDB0031346	C7H13NO5	53.7	-0.339195	2.16006	0.409236	0.0939947	0.233467
1.73_202.1084m/z	202.108	1.73	N-lactoyl-Leucine	HMDB0062176	C9H17NO4	53.5	-0.189077	1.51248			0.51143
13.95_505.9880m/z	505.988	13.95	Adenosinetriphosphate	HMDB0000538	C10H16N5O13P3	53.3	-0.837629	11.499	2.81587		0.479133
14.46_521.9820m/z	521.982	14.46	Guanosinetriphosphate	HMDB0001273	C10H16N5O14P3	53.3	-2.68623	1.42266	1.71083
13.95_426.0206m/z	426.021	13.95	ADP	HMDB0001341	C10H15N5O10P2	53.3	-3.59066	3.41115	1.81409
2.66_267.0737m/z	267.074	2.66	Inosine	HMDB0000195	C10H12N4O5	53.2	0.615901	7.73972	0.426841	0.0784724	0.184074
13.58_480.9803m/z	480.98	13.58	Thymidine5'-triphosphate	HMDB0001342	C10H17N2O14P3	53.2	-3.57926	1.56828	6.53386	3.91504
11.73_189.0517m/z	189.052	11.73	Glycyl-Aspartate	HMDB0028837	C6H10N2O5	53.1	-0.142783	1.58743	2.66967	1.79459
13.27_425.0798m/z	425.08	13.27	Cysteineglutathionedisulfide	HMDB0000656	C13H22N4O8S2	52.9	-1.87296	3.31094	0.344126
7.39_230.1030m/z	230.103	7.39	Isovalerylglutamicacid	HMDB0000726	C10H17NO5	52.7	-1.71963	1.27507	4.16078	2.63141
1.26_391.2846m/z	391.285	1.26	Deoxycholicacid	265	C24H40O4	52.6	-2.03141	4.36279		5.5936
9.69_174.0410m/z	174.041	9.69	N-Acetyl-L-asparticacid	HMDB0000812	C6H9NO5	52.6	0.950496	4.38006		0.630086
5.13_360.1293m/z	360.129	5.13	De-O-methylsimmondsin	HMDB0041208	C15H23NO9	52.5	-2.07638	6.10502	1.50478	1.89119
13.89_422.0870m/z	422.087	13.89	S-(1,2-DICARBOXYETHYL)GLUTATHIONE	44314	C14H21N3O10S	52.4	-1.13248	3.88969	2.12207	0.551634	0.271252
10.54_306.0498m/z	306.05	10.54	dCMP	HMDB0001202	C9H14N3O7P	52.4	0.58726	1.45235	4.77768		0.216592
1.46_498.2611m/z	498.261	1.46	LysoPE(0:0/20:5(5Z,8Z,11Z,14Z,17Z))	HMDB0011489	C25H42NO7P	52.3	-2.99481	1.08143		6.45522	7.83561
6.84_130.0619m/z	130.062	6.84	3-Guanidinopropanoate	44712	C4H9N3O2	52.2	-2.45935	1.14576		0.503011	0.557236
14.25_482.9606m/z	482.961	14.25	Uridinetriphosphate	HMDB0000285	C9H15N2O15P3	52.1	-1.38926	5.91781	6.12374	3.25913	0.543199
12.54_275.0882m/z	275.088	12.54	gamma-Glutamylglutamicacid	HMDB0011737	C10H16N2O7	52.1	-1.16987	1.37504	2.28907	3.6272
6.28_818.5916m/z	818.592	6.28	PS(20:0/18:0)	HMDB0112516	C44H86NO10P	51.9	-0.0851644	2.6248		0.284977
10.42_476.0706m/z	476.071	10.42	Chondroitin4-sulfate	HMDB0000652	C14H23NO15S	51.7	-1.98805	1.90374	4.68917	3.38886
7.64_195.0510m/z	195.051	7.64	Gluconicacid	HMDB0000625	C6H12O7	51.5	0.0423341	3.50909			0.594195
5.25_367.1045m/z	367.104	5.25	3-O-Caffeoyl-4-O-methylquinicacid	HMDB0039960	C17H20O9	51.4	2.86583	4.13169		3.25519	2.42663
0.90_840.5773m/z	840.577	0.9	PS(20:3(8Z,11Z,14Z)/20:0)	HMDB0112625	C46H84NO10P	51.4	1.5827	2.5285		4.53107	6.34127
11.81_613.1405m/z	613.14	11.81	CytidinemonophosphateN-acetylneuraminicacid	HMDB0001176	C20H31N4O16P	51.3	0.819325	5.69161	0.377179	0.250696
0.92_478.2927m/z	478.293	0.92	LysoPE(18:1(11Z)/0:0)	HMDB0011505	C23H46NO7P	51.3	-2.46919	1.54917	0.391323
11.81_242.0798m/z	242.08	11.81	Cytidine	HMDB0000089	C9H13N3O5	51.1	6.50128	4.67992	4.66294	5.76244
14.25_402.9939m/z	402.994	14.25	Uridine5'-diphosphate	HMDB0000295	C9H14N2O12P2	51	-2.44701	2.88398	3.70482	2.95884
11.15_300.0482m/z	300.048	11.15	N-acetyl-alpha-D-galactosamine1-phosphate	HMDB0059626	C8H16NO9P	51	-2.59859	2.66338	0.358436	0.250047
7.41_292.1035m/z	292.103	7.41	N-Acetylmuramate	HMDB0060493	C11H19NO8	51	-0.983673	1.04617	0.0985739	0.0142828	0.144317
3.94_844.6069m/z	844.607	3.94	PS(22:0/18:1(11Z))	HMDB0112713	C46H88NO10P	51	-0.474481	1.47522		0.210374
0.92_500.2772m/z	500.277	0.92	LysoPE(20:4(5Z,8Z,11Z,14Z)/0:0)	HMDB0011517	C25H44NO7P	50.9	-2.20988	1.33369	0.506104	3.09813	6.27616
1.35_602.3452m/z	602.345	1.35	JanthitremE	HMDB0030529	C37H49NO6	50.5	-5.89215	1.40474	0.608324	5.86039	9.53081
3.67_282.0841m/z	282.084	3.67	Guanosine	HMDB0000133	C10H13N5O5	50.4	-0.906199	3.16909	0.131459	0.144363
12.95_604.0700m/z	604.07	12.95	GDP-alpha-D-mannose(2-)	HMDB0062759	C16H25N5O16P2	50.4	0.210968	1.48696			0.650424
1.93_266.0894m/z	266.089	1.93	Adenosine	HMDB0000050	C10H13N5O4	50.1	-0.37827	4.28599	0.11875	0.129539
3.36_235.0718m/z	235.072	3.36	N'-Formylkynurenine	HMDB0001200	C11H12N2O4	50.1	-2.62349	1.12736	0.150235	0.0513471
0.89_892.6056m/z	892.606	0.89	PS(22:0/22:5(7Z,10Z,13Z,16Z,19Z))	HMDB0112732	C50H88NO10P	49.1	-1.86912	1.37351		3.87126	4.23461
2.68_252.0871m/z	252.087	2.68	N-lactoyl-Tyrosine	HMDB0062177	C12H15NO5	48.9	-2.56559	1.26897	0.480779	0.250101	0.520847
0.76_325.1831m/z	325.183	0.76	2-Dodecylbenzenesulfonicacid	HMDB0031031	C18H30O3S	48.6	-3.5908	1.60423	0.61878	1.99586	3.24292
0.89_866.5921m/z	866.592	0.89	PS(20:4(8Z,11Z,14Z,17Z)/22:0)	HMDB0112672	C48H86NO10P	48.6	0.461754	2.9356		4.91749	5.82522
14.43_481.9758m/z	481.976	14.43	Cytidinetriphosphate	HMDB0000082	C9H16N3O14P3	48.5	-3.01706	1.70427	3.64479	2.94569
0.81_303.2325m/z	303.233	0.81	Arachidonicacid	HMDB0001043	C20H32O2	48.5	-1.64768	2.78093		2.683	3.95967
6.25_790.5584m/z	790.558	6.25	PS(20:0/16:0)	HMDB0112514	C42H82NO10P	48.4	-2.49077	1.41754		0.257125
0.76_311.1678m/z	311.168	0.76	N-Undecylbenzenesulfonicacid	HMDB0032549	C17H28O3S	48.2	-2.77344	1.56275		2.1408	2.79764
0.75_205.1596m/z	205.16	0.75	2-benzylheptan-1-ol	HMDB0133179	C14H22O	48.1	-0.827277	2.79313		3.13118	3.42604
1.93_135.0318m/z	135.032	1.93	Hypoxanthine	HMDB0000157	C5H4N4O	48	4.49149	1.84854		0.325729	0.410763
12.19_588.0744m/z	588.074	12.19	GDP-L-fucose	HMDB0001095	C16H25N5O15P2	47.9	-0.891158	1.50099			0.634152
0.82_255.2330m/z	255.233	0.82	Palmiticacid	HMDB0000220	C16H32O2	47.8	0.0226979	4.07236	0.652865		1.69337
6.31_844.6067m/z	844.607	6.31	PS(18:0/22:1(13Z))	HMDB0112380	C46H88NO10P	47.8	-0.701264	2.13588		0.140686
8.66_110.9849m/z	110.985	8.66	Methylphosphate	HMDB0061711	CH5O4P	47.6	-3.28655	2.28069	0.301521	0.22793
1.41_480.3078m/z	480.308	1.41	LysoPE(18:0/0:0)	HMDB0011130	C23H48NO7P	47.5	-3.73055	1.99623	0.546486		4.29428
11.87_565.0487m/z	565.049	11.87	UDP-D-galactose(2-)	HMDB0062573	C15H24N2O17P2	47.4	1.76736	11.3652	1.83497		0.543723
0.78_515.2634m/z	515.263	0.78	CavipetinEisomer2	HMDB0059923	C29H40O8	47.2	-3.27044	1.20134		2.45903	2.17582
9.91_273.0379m/z	273.038	9.91	Alloathyriol	HMDB0038715	C14H10O6	47.1	-9.19434	2.05918		0.577774	0.407575
11.30_362.0495m/z	362.05	11.3	Guanosinemonophosphate	HMDB0001397	C10H14N5O8P	46.8	-3.38837	1.65397	0.194187		6.07583
1.17_868.6050m/z	868.605	1.17	PS(22:0/20:3(5Z,8Z,11Z))	HMDB0112722	C48H88NO10P	46.6	-2.622	1.10026		4.68714	5.9345
0.90_842.5916m/z	842.592	0.9	PS(22:1(13Z)/18:1(9Z))	HMDB0112743	C46H86NO10P	46.4	-0.0419972	2.58416	0.590982	2.49544	4.22502
11.33_202.0713m/z	202.071	11.33	N-acetyl-L-2-aminoadipate(2-)	HMDB0062715	C8H13NO5	45.9	-3.94813	1.46972	0.0721967	0.020723
1.38_436.2819m/z	436.282	1.38	PE(P-16:0e/0:0)	HMDB0011152	C21H44NO6P	45.7	-3.34574	1.36156	0.53138
0.90_722.5135m/z	722.514	0.9	PE(20:4(8Z,11Z,14Z,17Z)/P-16:0)	HMDB0009444	C41H74NO7P	44.9	0.718487	3.55708		2.26335	3.41849
10.26_382.0991m/z	382.099	10.26	Succinyladenosine	HMDB0000912	C14H17N5O8	44.7	-3.37291	1.45162	0.405578	0.372229
3.04_599.3186m/z	599.319	3.04	2-Stearoylglycerophosphoinositol	HMDB0061704	C27H53O12P	44.7	-2.57952	2.49861	0.300038		4.32999
9.25_218.0671m/z	218.067	9.25	O-Succinyl-L-homoserine	362	C8H13NO6	44.5	0.312465	1.72089		0.207994	0.343377
0.79_232.1702m/z	232.17	0.79	RotundineB	HMDB0035232	C15H23NO	44.5	-2.04	1.06845		4.88249	2.73596
11.35_606.0756m/z	606.076	11.35	Uridinediphosphate-N-acetylglucosamine	HMDB0000290	C17H27N3O17P2	44.4	2.18271	30.6154	0.499221	0.369098
10.17_784.1502m/z	784.15	10.17	FAD	HMDB0001248	C27H33N9O15P2	44	0.387929	1.08933		0.510864	0.655475
9.99_433.1928m/z	433.193	9.99	1,1'-Ethylidenebistryptophan	HMDB0034899	C24H26N4O4	44	10.7772	1.32677	1.94002
0.81_327.2322m/z	327.232	0.81	Docosahexaenoicacid	HMDB0002183	C22H32O2	43.9	-2.402	1.97078		2.41135	2.66939
0.79_329.2472m/z	329.247	0.79	4,8,12,15,19-Docosapentaenoicacid	HMDB0039133	C22H34O2	43.7	-4.33117	1.45274		2.48841	2.43638
0.92_738.5079m/z	738.508	0.92	PE(20:4(5Z,8Z,11Z,14Z)/16:0)	HMDB0009385	C41H74NO8P	43.4	0.000133236	1.76922		2.95278	4.67319
0.82_253.2168m/z	253.217	0.82	Palmitoleicacid	HMDB0003229	C16H30O2	43.3	-1.84564	1.15408	0.632004
6.66_773.5333m/z	773.533	6.66	PG(18:1(11Z)/18:1(11Z))	HMDB0010618	C42H79O10P	42.5	-0.602543	1.41026		0.0439781
9.11_408.1623m/z	408.162	9.11	N-Carbamoylglucuronidelorcaserin	HMDB0061159	C21H28ClNO5	42.5	9.7653	1.1114	1.69744		0.426571
3.91_773.5342m/z	773.534	3.91	PG(18:2(9Z,12Z)/18:0)	HMDB0010647	C42H79O10P	42.4	0.544827	2.35798	0.2958	0.0619816
0.75_339.1986m/z	339.199	0.75	NORETHINDRONEACETATE	44171	C22H28O3	42.3	5.84731	1.23668	0.501984		3.64541
9.87_231.0621m/z	231.062	9.87	Kifunensine	45180	C8H12N2O6	42.3	-0.626684	1.88796	0.441874	0.574408
2.97_619.2883m/z	619.288	2.97	1-Arachidonoylglycerophosphoinositol	HMDB0061690	C29H49O12P	41.7	-0.891472	2.19022	0.284564		6.87542
6.64_742.5383m/z	742.538	6.64	PE(18:1(9Z)/18:1(11Z))	HMDB0009058	C41H78NO8P	41.4	-1.31399	1.40212		0.219984
11.73_481.1044m/z	481.104	11.73	(-)-Epigallocatechin3'-glucuronide	HMDB0041638	C21H22O13	41.4	11.6578	2.52992	0.520225	0.604424
0.79_309.2791m/z	309.279	0.79	OleicAcidethylester	45007	C20H38O2	41.3	-2.68913	1.21244	0.337481	0.17871
11.32_300.0384m/z	300.038	11.32	N-Acetylgalactosamine4-sulphate	HMDB0000781	C8H15NO9S	40.7	-3.4137	2.01706		0.277306	0.424076
9.31_267.0718m/z	267.072	9.31	3-Deoxy-D-glycero-D-galacto-2-nonulosonicacid	HMDB0000425	C9H16O9	40.6	-1.22815	1.70516	0.672473	0.390951	0.580684
11.35_563.0678m/z	563.068	11.35	dTDP-D-glucose	HMDB0001328	C16H26N2O16P2	40.3	-1.13705	4.23305	0.546318	0.459376
0.70_433.1399m/z	433.14	0.7	HoPhe-Phe-OH	65012	C24H22N2O6	40.1	-1.47934	1.58617		2.09932	1.7131
0.92_768.5500m/z	768.55	0.92	PE(18:0/20:3(5Z,8Z,11Z))	HMDB0009001	C43H80NO8P	40.1	-6.28985	1.22779		4.97183	6.63431
8.58_387.1132m/z	387.113	8.58	Sulfinpyrazonesulfide	HMDB0060943	C23H20N2O2S	40.1	-10.4319	1.80817		1.63305
0.81_281.2487m/z	281.249	0.81	Oleicacid	HMDB0000207	C18H34O2	40	0.192561	3.85446	0.443215	0.5095
0.84_227.2016m/z	227.202	0.84	Myristicacid	HMDB0000806	C14H28O2	39.9	-0.390452	1.30881	0.584952	0.615795
0.75_819.5184m/z	819.518	0.75	PG(22:6(4Z,7Z,10Z,13Z,16Z,19Z)/18:1(11Z))	HMDB0116632	C46H77O10P	39.9	0.245803	4.14445	0.438209

## Sheet: Four modes combinations
Table S4. The key information of 393 differential metabolites quantified by 4 analysis modes
		RPLC-POS											RPLC-NEG											HILIC-POS											HILIC-NEG
Metabolite ID	Quantified mode times	Metabolic feature	m/z	RT(min)	Metabolite name	Formula	Score	Mass Error(ppm)	VIP	FC(16/DMSO)	FC(32/DMSO)	FC(32/16)	Metabolic feature	m/z	RT(min)	Metabolite name	Formula	Score	Mass Error(ppm)	VIP	FC(16/DMSO)	FC(32/DMSO)	FC(32/16)	Metabolic feature	m/z	RT(min)	Metabolite name	Formula	Score	Mass Error(ppm)	VIP	FC(16/DMSO)	FC(32/DMSO)	FC(32/16)	Metabolic feature	m/z	RT(min)	Metabolite name	Formula	Score	Mass Error(ppm)	VIP	FC(16/DMSO)	FC(32/DMSO)	FC(32/16)
HMDB0000538	4	3.55_508.0021m/z	508.002	3.55	Adenosinetriphosphate	C10H16N5O13P3	48.8	-1.75127	9.65814	4.2772	3.95653		0.87_505.9876m/z	505.988	0.87	Adenosinetriphosphate	C10H16N5O13P3	48.9	-1.6519	4.34747		10.2904		13.79_508.0024m/z	508.002	13.79	Adenosinetriphosphate	C10H16N5O13P3	53.5	-1.16617	7.635	2.18882		0.529174	13.95_505.9880m/z	505.988	13.95	Adenosinetriphosphate	C10H16N5O13P3	53.3	-0.837629	11.499	2.81587		0.479133
HMDB0001067	3	5.60_305.0961m/z	305.096	5.6	N-Acetylaspartylglutamicacid	C11H16N2O8	46.9	-5.9	2.50888		0.535012	0.550329												11.80_305.0967m/z	305.097	11.8	N-Acetylaspartylglutamicacid	C11H16N2O8	48.2	-3.97934	0.975753		0.390504	0.494798	12.04_303.0833m/z	303.083	12.04	N-Acetylaspartylglutamicacid	C11H16N2O8	53.8	-0.434011	4.62972	0.647983	0.353886	0.545681
HMDB0006552	3	9.71_313.0708m/z	313.071	9.71	AflatoxinB1	C17H12O6	48.1	0.330155	5.77061	16974.5	11528.6	0.643176	8.80_311.0556m/z	311.056	8.8	AflatoxinB1	C17H12O6	54.7	-1.51002	3.11419	-2.51235e+07	-1.67234e+07		0.81_313.0706m/z	313.071	0.81	AflatoxinB1	C17H12O6	49.6	-0.324674	2.92292	-1.96038e+08	-1.48496e+08
HMDB0000195	3	5.78_269.0877m/z	269.088	5.78	Inosine	C10H12N4O5	51.6	-1.34816	1.36595		0.240638	0.166337	2.67_267.0732m/z	267.073	2.67	Inosine	C10H12N4O5	45.9	-0.943676	4.61867	0.438396	0.000500794	0.00117425												2.66_267.0737m/z	267.074	2.66	Inosine	C10H12N4O5	53.2	0.615901	7.73972	0.426841	0.0784724	0.184074
HMDB0000133	3	5.78_284.0983m/z	284.098	5.78	Guanosine	C10H13N5O5	53.1	-2.24345	1.12559	0.60754	0.316679	0.544793												3.38_284.0981m/z	284.098	3.38	Guanosine	C10H13N5O5	54.8	-2.93966	1.53784	0.181748	0.146349		3.67_282.0841m/z	282.084	3.67	Guanosine	C10H13N5O5	50.4	-0.906199	3.16909	0.131459	0.144363
96312	2	6.12_292.1016m/z	292.102	6.12	Toyocamycin	C12H13N5O4	39.8	-8.45113	1.83903	0.607123	1.64342	585.051												8.17_292.1024m/z	292.102	8.17	Toyocamycin	C12H13N5O4	42.2	-5.75128	1.90362		0.457881	0.609091
19688	2	2.99_379.1273m/z	379.127	2.99	AspAsnMet	C13H22N4O7S	41.2	-2.48307	6.7775	4.13755	3.90528													10.41_379.1281m/z	379.128	10.41	AspAsnMet	C13H22N4O7S	43	-0.148329	5.81496		1.80408
HMDB0059644	2	1.47_684.1392m/z	684.139	1.47	(6S)-6-beta-hydroxy-1,4,5,6-tetrahydronicotinamide-adeninedinucleotide	C21H31N7O15P2	41.4	-5	1.81689	3.67821	2.64834		5.62_682.1284m/z	682.128	5.62	(6S)-6-beta-hydroxy-1,4,5,6-tetrahydronicotinamide-adeninedinucleotide	C21H31N7O15P2	43.3	0.520084	2.70245		7.30655e+07	1.28427e+08
HMDB0010397	2	12.34_542.3205m/z	542.321	12.34	LysoPC(20:5(5Z,8Z,11Z,14Z,17Z))	C28H48NO7P	41.9	-6.7	1.30918	5.17192		10.9795												1.25_542.3221m/z	542.322	1.25	LysoPC(20:5(5Z,8Z,11Z,14Z,17Z))	C25H43N5O8	49.4	6.82172	1.56724		9.79326	7.28884
HMDB0031346	2	5.69_192.0851m/z	192.085	5.69	CalystegineC1	C7H13NO5	42.1	-7.8	1.06073	0.438894	0.0884117	0.203174																							3.64_190.0720m/z	190.072	3.64	CalystegineC1	C7H13NO5	53.7	-0.339195	2.16006	0.409236	0.0939947	0.233467
HMDB0033282	2	1.23_537.1930m/z	537.193	1.23	8-Hydroxypinoresinol4-glucoside	C26H32O12	43.2	-6.9	1.26954		0.473433	0.574461												7.80_537.1934m/z	537.193	7.8	8-Hydroxypinoresinol4-glucoside	C26H32O12	44.8	-6.10541	2.98627		1.6756
HMDB0001248	2	6.31_786.1629m/z	786.163	6.31	FAD	C27H33N9O15P2	44.4	-1.96307	1.97377		0.5628	0.61115																							10.17_784.1502m/z	784.15	10.17	FAD	C27H33N9O15P2	44	0.387929	1.08933		0.510864	0.655475
HMDB0011152	2	13.42_438.2971m/z	438.297	13.42	PE(P-16:0e/0:0)	C21H44NO6P	44.5	-1.7	4.27947	0.585989	0.530669																								1.38_436.2819m/z	436.282	1.38	PE(P-16:0e/0:0)	C21H44NO6P	45.7	-3.34574	1.36156	0.53138
HMDB0000157	2	5.78_137.0450m/z	137.045	5.78	Hypoxanthine	C5H4N4O	45.1	-5.60476	2.42735		0.209416	0.134675																							1.93_135.0318m/z	135.032	1.93	Hypoxanthine	C5H4N4O	48	4.49149	1.84854		0.325729	0.410763
HMDB0133048	2	14.30_279.1580m/z	279.158	14.3	2-[(3,3-dimethyloxiran-2-yl)methyl]-4-(3-methylbut-2-en-1-yl)benzene-1,3,5-triol	C16H22O4	45.5	-3.97588	1.85315		1.86885													0.73_279.1583m/z	279.158	0.73	2-[(3,3-dimethyloxiran-2-yl)methyl]-4-(3-methylbut-2-en-1-yl)benzene-1,3,5-triol	C16H22O4	40.2	-2.97877	1.52887	0.406221
HMDB0010381	2	12.37_482.3232m/z	482.323	12.37	LysoPC(15:0)	C23H48NO7P	45.8	-1.9	2.53295		4.80522	3.86923	12.06_480.3085m/z	480.308	12.06	LysoPC(15:0)	C23H48NO7P	46.7	-2.17472	2.21324		2.22919	3.68826
HMDB0010404	2	12.52_568.3387m/z	568.339	12.52	LysoPC(22:6(4Z,7Z,10Z,13Z,16Z,19Z))	C30H50NO7P	46.1	-1.9	4.55053		4.43845	3.10891												1.22_568.3374m/z	568.337	1.22	LysoPC(22:6(4Z,7Z,10Z,13Z,16Z,19Z))	C30H50NO7P	46.4	-4.16156	1.08951		3.7231	4.54852
HMDB0000756	2	7.63_260.1853m/z	260.185	7.63	L-Hexanoylcarnitine	C13H25NO4	46.9	-1.4499	3.0292		0.218808	0.268555												1.96_260.1850m/z	260.185	1.96	L-Hexanoylcarnitine	C13H25NO4	49.3	-2.30588	1.68731		0.249602	0.280385
HMDB0013250	2	13.87_286.2367m/z	286.237	13.87	Myristoylglycine	C16H31NO3	47	-3.5	1.29328		0.191203	0.298947	13.40_284.2224m/z	284.222	13.4	Myristoylglycine	C16H31NO3	44.3	-2.59868	1.21528	0.32343	0.147178	0.454079
HMDB0000159	2	6.08_166.0861m/z	166.086	6.08	L-Phenylalanine	C9H11NO2	47.2	-0.911966	8.54857	1.59496																									3.38_164.0718m/z	164.072	3.38	L-Phenylalanine	C9H11NO2	56	0.538374	4.6152		1.81909
HMDB0010386	2	12.55_520.3388m/z	520.339	12.55	LysoPC(18:2(9Z,12Z))	C26H50NO7P	47.4	-1.8	11.0005	1.90681	14.6835	10.7227												1.26_520.3376m/z	520.338	1.26	LysoPC(18:2(9Z,12Z))	C26H50NO7P	51.5	-4.26353	3.02439			5.31468
HMDB0001178	2	5.61_560.0769m/z	560.077	5.61	Adenosinediphosphateribose	C15H23N5O14P2	47.5	-3.62749	1.17543	0.500553	0.297317	0.58746												10.80_560.0770m/z	560.077	10.8	Adenosinediphosphateribose	C15H23N5O14P2	50.7	-3.51403	1.2744		14.1252	8.00518
HMDB0013112	2	1.67_608.0878m/z	608.088	1.67	UDP-N-acetyl-D-mannosamine	C17H27N3O17P2	47.5	-1.6	8.30647	0.551148	0.44509													11.06_608.0886m/z	608.089	11.06	UDP-N-acetyl-D-mannosamine	C17H27N3O17P2	51.7	-0.357496	8.23834	0.474214	0.330359
HMDB0010402	2	12.85_570.3549m/z	570.355	12.85	LysoPC(22:5(4Z,7Z,10Z,13Z,16Z))	C30H52NO7P	47.9	-0.9	4.33663	1.77216	5.58635	3.29098												1.22_570.3534m/z	570.353	1.22	LysoPC(22:5(4Z,7Z,10Z,13Z,16Z))	C30H52NO7P	45.5	-3.57222	1.31926		4.75455	5.438
HMDB0011130	2	14.47_482.3235m/z	482.324	14.47	LysoPE(18:0/0:0)	C23H48NO7P	48	-1.2	2.94697		1.61239	2.329																							1.41_480.3078m/z	480.308	1.41	LysoPE(18:0/0:0)	C23H48NO7P	47.5	-3.73055	1.99623	0.546486		4.29428
HMDB0011489	2	11.88_500.2762m/z	500.276	11.88	LysoPE(0:0/20:5(5Z,8Z,11Z,14Z,17Z))	C25H42NO7P	48.4	-2	3.6361	1.83315	7.6156	4.39836																							1.46_498.2611m/z	498.261	1.46	LysoPE(0:0/20:5(5Z,8Z,11Z,14Z,17Z))	C25H42NO7P	52.3	-2.99481	1.08143		6.45522	7.83561
HMDB0010395	2	13.43_544.3357m/z	544.336	13.43	LysoPC(20:4(5Z,8Z,11Z,14Z))	C28H50NO7P	48.4	2.95533	4.43133		3.0403	2.40626												1.23_544.3373m/z	544.337	1.23	LysoPC(20:4(5Z,8Z,11Z,14Z))	C28H50NO7P	50.3	-4.59036	2.51982		4.42659	5.80147
HMDB0000821	2	7.58_194.0809m/z	194.081	7.58	Phenylacetylglycine	C10H11NO3	48.5	-1.23382	2.80216	2.55773	1.6295	0.64188	6.30_192.0669m/z	192.067	6.3	Phenylacetylglycine	C10H11NO3	45.7	1.34069	13.6532	2.03034
HMDB0015109	2	1.41_293.0979m/z	293.098	1.41	EdeticAcid	C10H16N2O8	48.8		10.5565		2.26335	1.91592												11.11_293.0972m/z	293.097	11.11	EdeticAcid	C10H16N2O8	47.1	-2.54347	1.50494	0.287951	0.236838
HMDB0011506	2	13.37_480.3078m/z	480.308	13.37	LysoPE(18:1(9Z)/0:0)	C23H46NO7P	49	-1.42459	3.57846			1.85563	10.24_478.2926m/z	478.293	10.24	LysoPE(18:1(9Z)/0:0)	C23H46NO7P	41.8	-2.79734	1.35838	0.596923
HMDB0001487	2	5.69_666.1305m/z	666.13	5.69	NADH	C21H29N7O14P2	50	-2.35406	7.66727	0.543838	0.324935	0.610504												9.98_666.1316m/z	666.132	9.98	NADH	C21H29N7O14P2	51.1	-0.641981	4.85713			0.280462
HMDB0011488	2	12.34_502.2915m/z	502.291	12.34	LysoPE(0:0/20:4(8Z,11Z,14Z,17Z))	C25H44NO7P	50.4	-2.6	2.77446			3.86608												1.32_502.2909m/z	502.291	1.32	LysoPE(0:0/20:4(8Z,11Z,14Z,17Z))	C32H39NO4	53	-8.56092	1.34386		4.36006	5.9706
96392	2	6.46_146.0594m/z	146.059	6.46	4-formylIndole	C9H7NO	50.4	-4.39856	3.07858	1.55194														3.02_146.0591m/z	146.059	3.02	4-formylIndole	C9H7NO	56.2	-6.71235	1.11552	1.49509
HMDB0010384	2	14.58_524.3700m/z	524.37	14.58	LysoPC(18:0)	C26H54NO7P	50.5	-2.1114	6.23115	0.484045		2.0518												1.22_524.3667m/z	524.367	1.22	LysoPC(18:0)	C26H54NO7P	48.1	-8.35048	2.51989	0.364543
HMDB0010379	2	11.74_468.3079m/z	468.308	11.74	LysoPC(14:0/0:0)	C22H46NO7P	50.6	-1.23853	5.12099		4.31285	3.55453												1.34_468.3072m/z	468.307	1.34	LysoPC(14:0/0:0)	C22H46NO7P	49	-2.69828	1.45566			2.69693
HMDB0011171	2	6.50_261.1437m/z	261.144	6.5	gamma-Glutamylleucine	C11H20N2O5	50.8	-3.02298	2.71123	2.82105	1.85248	0.66002	5.28_259.1293m/z	259.129	5.28	gamma-Glutamylleucine	C11H20N2O5	54.8	-2.62237	1.64811		3487.87	-1.70301e+08
3318	2	1.22_184.0728m/z	184.073	1.22	Phosphocholine	C5H14NO4P	56.4	-2.77145	8.63026	5.67004	8.21999													11.57_184.0732m/z	184.073	11.57	Phosphocholine	C5H14NO4P	54.4	-0.815472	16.84	2.39025	2.91667
HMDB0011517	2												11.46_500.2776m/z	500.278	11.46	LysoPE(20:4(5Z,8Z,11Z,14Z)/0:0)	C25H44NO7P	45.9	-1.42025	3.1609		7.46539	13.7856												0.92_500.2772m/z	500.277	0.92	LysoPE(20:4(5Z,8Z,11Z,14Z)/0:0)	C25H44NO7P	50.9	-2.20988	1.33369	0.506104	3.09813	6.27616
HMDB0001043	2												14.74_303.2324m/z	303.232	14.74	Arachidonicacid	C20H32O2	46.3	-1.69442	1.37525		4.4816	6.43378												0.81_303.2325m/z	303.233	0.81	Arachidonicacid	C20H32O2	48.5	-1.64768	2.78093		2.683	3.95967
HMDB0028912	2												3.52_258.1816m/z	258.182	3.52	Isoleucyl-Lysine	C12H25N3O3	47.4	-2.57064	1.26901	1.78686	0.163005	0.0957807												7.44_258.1822m/z	258.182	7.44	Isoleucyl-Lysine	C12H25N3O3	55.1	-0.502895	2.48839		0.43624	0.340301
HMDB0062176	2												6.80_202.1086m/z	202.109	6.8	N-lactoyl-Leucine	C9H17NO4	49.5	0.648985	3.91273	1.58104		0.494656												1.73_202.1084m/z	202.108	1.73	N-lactoyl-Leucine	C9H17NO4	53.5	-0.189077	1.51248			0.51143
HMDB0000210	2												5.18_218.1037m/z	218.104	5.18	Pantothenicacid	C9H17NO5	50.2	1.33399	15.8758		2373.83	960.078												4.20_218.1036m/z	218.104	4.2	Pantothenicacid	C9H17NO5	54.1	1.07219	7.71475		0.513073	0.481002
HMDB0000191	2												0.77_132.0303m/z	132.03	0.77	L-Asparticacid	C4H7NO4	52.4	0.201264	3.17175	3.60549	2.7941													9.84_132.0305m/z	132.03	9.84	L-Asparticacid	C4H7NO4	54.1	1.71844	3.45851	2.63223	2.94913
HMDB0000295	2																							11.05_405.0083m/z	405.008	11.05	Uridine5'-diphosphate	C9H14N2O12P2	41.1	-2.89187	1.25172	0.445359	0.304397		14.25_402.9939m/z	402.994	14.25	Uridine5'-diphosphate	C9H14N2O12P2	51	-2.44701	2.88398	3.70482	2.95884
HMDB0000082	2																							14.34_483.9909m/z	483.991	14.34	Cytidinetriphosphate	C9H16N3O14P3	44.4	-1.91564	1.83829	3.3839	2.79408		14.43_481.9758m/z	481.976	14.43	Cytidinetriphosphate	C9H16N3O14P3	48.5	-3.01706	1.70427	3.64479	2.94569
HMDB0062715	2																							11.06_204.0862m/z	204.086	11.06	N-acetyl-L-2-aminoadipate(2-)	C8H13NO5	46.3	-2.07086	2.27036	0.446885	0.288441	0.645466	11.33_202.0713m/z	202.071	11.33	N-acetyl-L-2-aminoadipate(2-)	C8H13NO5	45.9	-3.94813	1.46972	0.0721967	0.020723
HMDB0001273	2																							14.39_523.9968m/z	523.997	14.39	Guanosinetriphosphate	C10H16N5O14P3	47.2	-2.2576	1.80935	1.77836			14.46_521.9820m/z	521.982	14.46	Guanosinetriphosphate	C10H16N5O14P3	53.3	-2.68623	1.42266	1.71083
HMDB0059660	2																							8.32_216.0630m/z	216.063	8.32	sn-glycero-3-Phosphoethanolamine	C5H14NO6P	49.3	-0.842178	1.62098		0.476413	0.598393	8.67_214.0489m/z	214.049	8.67	sn-glycero-3-Phosphoethanolamine	C5H14NO6P	54	1.31561	4.11722		0.523783
HMDB0060244	2																							10.77_170.0565m/z	170.056	10.77	Phosphodimethylethanolamine	C4H12NO4P	50.5	-6.99882	1.18961	4.08191	4.08011		11.82_168.0431m/z	168.043	11.82	Phosphodimethylethanolamine	C4H12NO4P	55.1	-0.193286	5.19186	4.04619	5.29256
HMDB0001397	2																							11.00_364.0642m/z	364.064	11	Guanosinemonophosphate	C10H14N5O8P	50.9	-3.07323	1.09326		2.56781	3.54711	11.30_362.0495m/z	362.05	11.3	Guanosinemonophosphate	C10H14N5O8P	46.8	-3.38837	1.65397	0.194187		6.07583
HMDB0061711	2																							8.29_112.9989m/z	112.999	8.29	Methylphosphate	CH5O4P	50.9	-8.17442	1.15717	0.299657	0.221586		8.66_110.9849m/z	110.985	8.66	Methylphosphate	CH5O4P	47.6	-3.28655	2.28069	0.301521	0.22793
HMDB0001176	2																							11.51_615.1532m/z	615.153	11.51	CytidinemonophosphateN-acetylneuraminicacid	C20H31N4O16P	51	-2.17199	1.70436	0.378004	0.229466	0.607114	11.81_613.1405m/z	613.14	11.81	CytidinemonophosphateN-acetylneuraminicacid	C20H31N4O16P	51.3	0.819325	5.69161	0.377179	0.250696
HMDB0000050	2																							1.83_268.1041m/z	268.104	1.83	Adenosine	C10H13N5O4	51.5	0.447878	7.07578	0.140165	0.13124		1.93_266.0894m/z	266.089	1.93	Adenosine	C10H13N5O4	50.1	-0.37827	4.28599	0.11875	0.129539
HMDB0000230	2																							8.17_310.1130m/z	310.113	8.17	N-Acetylneuraminicacid	C11H19NO9	51.7	-0.7138	2.16285		0.458016	0.608201	8.52_308.0988m/z	308.099	8.52	N-Acetylneuraminicacid	C11H19NO9	54.4	0.469344	7.5491		0.464952	0.592933
HMDB0000656	2																							13.03_427.0942m/z	427.094	13.03	Cysteineglutathionedisulfide	C13H22N4O8S2	51.7	-2.31437	2.18023	0.346322			13.27_425.0798m/z	425.08	13.27	Cysteineglutathionedisulfide	C13H22N4O8S2	52.9	-1.87296	3.31094	0.344126
HMDB0000099	2																							11.29_223.0746m/z	223.075	11.29	L-Cystathionine	C7H14N2O4S	52.4	-0.580566	3.53829		0.202695	0.280109	11.58_221.0602m/z	221.06	11.58	L-Cystathionine	C7H14N2O4S	54.8	0.0162216	4.09709		0.284714	0.357244
HMDB0000912	2																							9.95_384.1147m/z	384.115	9.95	Succinyladenosine	C14H17N5O8	52.8	-0.876503	2.52778	0.399679	0.341314		10.26_382.0991m/z	382.099	10.26	Succinyladenosine	C14H17N5O8	44.7	-3.37291	1.45162	0.405578	0.372229
44314	2																							13.70_424.1015m/z	424.101	13.7	S-(1,2-DICARBOXYETHYL)GLUTATHIONE	C14H21N3O10S	55.6	-1.35481	2.00774		0.549266	0.360861	13.89_422.0870m/z	422.087	13.89	S-(1,2-DICARBOXYETHYL)GLUTATHIONE	C14H21N3O10S	52.4	-1.13248	3.88969	2.12207	0.551634	0.271252
HMDB0000285	2																							14.17_484.9758m/z	484.976	14.17	Uridinetriphosphate	C9H15N2O15P3	56	-0.0563752	3.44541	4.02792	3.17626		14.25_482.9606m/z	482.961	14.25	Uridinetriphosphate	C9H15N2O15P3	52.1	-1.38926	5.91781	6.12374	3.25913	0.543199
102	2																							13.54_744.0816m/z	744.082	13.54	NicotinamideAdenineDinucleotidePhosphate(NADP+)	C21H28N7O17P3	57.7	-1.4681	1.71513	1.74949		0.556322	13.75_742.0681m/z	742.068	13.75	NicotinamideAdenineDinucleotidePhosphate(NADP+)	C21H28N7O17P3	58	-0.108587	1.58621	2.36216		0.640123
62939	1	15.30_510.3901m/z	510.39	15.3	2-O-ethylPAFC-16	C26H56NO6P	39.6	-3.31559	2.32799	0.46327	0.335787
36193	1	13.34_357.2604m/z	357.26	13.34	13,14-dihydro-PGE1	C20H36O5	39.7	-8.86692	2.39046	0.107486	0.0155757	0.151308
45673	1	12.61_410.3253m/z	410.325	12.61	PGF2adiethylamide	C24H43NO4	39.7	-2.87664	3.93081	69.7314	9.89209	0.250346
265055	1	14.64_315.2302m/z	315.23	14.64	Methyldehydroabietate	C21H30O2	39.8	-5.28062	1.17737		9.02375	26.0082
264167	1	12.33_602.3388m/z	602.339	12.33	GluGluValLeuIle	C27H47N5O10	39.8	-1.26432	1.10482	2.10068		0.531548
162173	1	13.76_581.3643m/z	581.364	13.76	IleHisArgArg	C24H44N12O5	39.9	2.23391	3.59188	96.7519	11.6673	0.328577
23647	1	5.63_229.1536m/z	229.154	5.63	ProLeu	C11H20N2O3	40.3	-4.88007	1.10238	0.662333	0.423301	0.63909
264871	1	13.55_572.3699m/z	572.37	13.55	LeuSerProLysLys	C26H49N7O7	40.3	-11.8536	1.41404		8.57048	7.98599
HMDB0008935	1	14.84_742.5378m/z	742.538	14.84	PE(16:0/20:3(5Z,8Z,11Z))	C41H76NO8P	40.3	-0.4	3.51618		4.37709
261713	1	13.62_539.2595m/z	539.26	13.62	TyrSerAsnArg	C22H34N8O8	40.4	4.20289	1.21492		1.59501
19689	1	11.82_376.2595m/z	376.26	11.82	LysThrLys	C16H33N5O5	40.4	10.6771	5.57144		1.78875
262447	1	13.81_537.3380m/z	537.338	13.81	TyrValLysLys	C26H44N6O6	40.5	-2.85523	3.61809	109.856	12.1464	0.323854
HMDB0013122	1	13.81_508.3749m/z	508.375	13.81	LysoPC(P-18:0)	C26H54NO6P	40.5	-2.5	5.43131		0.36016	0.439232
17238	1	11.94_415.2108m/z	415.211	11.94	LysHisMet	C17H30N6O4S	40.6	-3.40957	1.84997		1.67317
HMDB0030459	1	6.70_581.3135m/z	581.313	6.7	HordatineB	C29H40N8O5	40.6	-10.2	1.01672	0.395209		2.94722
HMDB0032112	1	14.84_317.3040m/z	317.304	14.84	1,2,4-Nonadecanetriol	C19H40O3	40.7	-3.12554	1.50853	0.0990196	0.0174854	0.218518
HMDB0062735	1	3.75_248.1481m/z	248.148	3.75	(R)-3-hydroxybutyrylcarnitine	C11H21NO5	40.8	-4.6	2.05421	0.27654	0.110552	0.399683
HMDB0062332	1	10.94_414.3049m/z	414.305	10.94	N-DocosahexaenoylGABA	C26H39NO3	40.8	11.2	1.26199	0.569645	0.490572
HMDB0012316	1	14.65_864.6231m/z	864.623	14.65	3-O-Sulfogalactosylceramide(d18:1/22:0)	C46H89NO11S	41	0.2	1.20219		1.53976
HMDB0011195	1	11.66_442.3504m/z	442.35	11.66	2-Hydroxy-3-methoxyestrone	C25H47NO5	41.1	-5.2	2.08528	0.121445	0.0840063
HMDB0008739	1	14.30_854.5787m/z	854.579	14.3	PC(22:6(4Z,7Z,10Z,13Z,16Z,19Z)/20:4(5Z,8Z,11Z,14Z))	C50H80NO8P	41.1	10.9	1.90775		2.45222
HMDB0012986	1	13.91_572.2942m/z	572.294	13.91	Kinetensin4-7	C26H37N9O6	41.3	0.3	1.16067	2.34555	4.76339	2.78165
HMDB0033613	1	6.12_740.3540m/z	740.354	6.12	GlabrinD	C36H49N7O10	41.3	-10	2.16319	0.535003		25.8786
HMDB0008924	1	18.85_690.5061m/z	690.506	18.85	PE(16:0/16:1(9Z))	C37H72NO8P	41.5	-1.1	1.06306	2.95364	3.29356
22553	1	5.77_366.1327m/z	366.133	5.77	MetSerGlu	C13H23N3O7S	41.7	-0.7873	1.33985	1.58391	2.177
HMDB0000341	1	6.31_173.0798m/z	173.08	6.31	2-Octenedioicacid	C8H12O4	41.8	-6.257	1.28384		0.567383	0.556343
215747	1	15.00_502.3151m/z	502.315	15	ArgAlaGlnLys	C20H39N9O6	41.8	10.9575	2.87284		1.86768
258062	1	7.43_561.2686m/z	561.269	7.43	TyrHisLeuGlu	C26H36N6O8	41.9	3.2897	1.10866	1.72824	3.06855	1.78633
265004	1	11.93_542.3231m/z	542.323	11.93	LeuAlaProLeuGlu	C25H43N5O8	41.9	8.51807	5.6542	2.02898	17.0896	10.0315
HMDB0029336	1	7.32_648.3783m/z	648.378	7.32	NummularineA	C36H49N5O6	41.9	4.3	3.19698	53.4237	2.70777	0.122611
HMDB0061640	1	10.53_388.3046m/z	388.305	10.53	3-hydroxytetradecanoylcarnitine	C21H41NO5	41.9	-2.9	1.57462	0.12187	0.0186968	0.152866
HMDB0039132	1	13.97_353.1952m/z	353.195	13.97	[4]-Gingerdiol3,5-diacetate	C19H28O6	41.9	-2	2.07283	2.0883	2.90346
65409	1	13.15_291.1949m/z	291.195	13.15	EcklonialactoneA	C18H26O3	41.9	-1.88596	1.86706		2.77229	2.05864
HMDB0010392	1	13.79_548.3690m/z	548.369	13.79	LysoPC(20:2(11Z,14Z))	C28H54NO7P	41.9	-3.8	1.47007		3.80622	7.04732
HMDB0062517	1	11.91_386.3252m/z	386.325	11.91	Pentadecanoylcarnitine	C22H43NO4	42.1	-3.4	1.95662	0.194243	0.0895794	0.454342
HMDB0011526	1	12.47_526.2975m/z	526.298	12.47	LysoPE(22:6(4Z,7Z,10Z,13Z,16Z,19Z)/0:0)	C27H44NO7P	42.2	8.9	3.13137		2.6868	2.34324
HMDB0061634	1	7.64_304.2109m/z	304.211	7.64	3-hydroxyoctanoylcarnitine	C15H29NO5	42.3	-3.1	1.11586	0.140939	0.0451599	0.319864
HMDB0061822	1	15.03_283.1740m/z	283.174	15.03	Hexaethyleneglycol	C12H26O7	42.3	-4.2	1.18378		1.65366
HMDB0013195	1	12.58_170.0953m/z	170.095	12.58	4-Aminobiphenyl	C12H11N	42.4	-6.84622	1.33952		5.49747	3.30584
HMDB0112884	1	16.29_848.6284m/z	848.628	16.29	PS(24:0/16:0)	C46H90NO10P	42.4	-10.7	2.95737	1.52346
65298	1	5.60_327.0785m/z	327.079	5.6	Asp-Abu-OH	C13H14N2O8	42.5	-11.6384	1.34109			0.66977
HMDB0010393	1	13.39_546.3509m/z	546.351	13.39	LysoPC(20:3(5Z,8Z,11Z))	C28H52NO7P	42.6	6.96205	1.2012	1.84508	3.69476	2.18861
HMDB0030992	1	6.76_187.0960m/z	187.096	6.76	5-Butyltetrahydro-2-oxo-3-furancarboxylicacid	C9H14O4	42.6	-2.5	1.35132		0.479188	0.360589
HMDB0011237	1	16.26_716.5512m/z	716.551	16.26	PC(P-18:0/14:1(9Z))	C40H78NO7P	42.6	-10.7	8.09549		1.68221
HMDB0010383	1	12.11_494.3234m/z	494.323	12.11	LysoPC(16:1(9Z)/0:0)	C24H48NO7P	42.8	-1.50828	12.0466		7.18393	3.74888
154947	1	7.61_540.3299m/z	540.33	7.61	HisLysGlnLys	C23H41N9O6	42.9	8.67716	2.25298	60.2009	2.33517	0.0852441
HMDB0062555	1	5.88_262.1638m/z	262.164	5.88	hydroxyisovaleroylcarnitine	C12H23NO5	43	-4.2	2.1416	0.533083	0.252255	0.473302
HMDB0008854	1	14.54_634.4487m/z	634.449	14.54	PE(14:1(9Z)/14:0)	C33H64NO8P	43.2	7	4.90525	2.40793	4.45771	1.61978
HMDB0000300	1	5.28_113.0334m/z	113.033	5.28	Uracil	C4H4N2O2	43.3	-10.1713	1.24472	10.1901	6.23072	0.620434
HMDB0010389	1	12.11_516.3045m/z	516.304	12.11	LysoPC(18:4(6Z,9Z,12Z,15Z))	C26H46NO7P	43.4	3.34921	3.90088		7.97021	4.51038
HMDB0041222	1	5.91_459.1714m/z	459.171	5.91	a-L-Fucopyranosyl-(1->2)-b-D-galactopyranosyl-(1->2)-D-xylose	C17H30O14	43.4	1.3	1.88521	0.287235		22.0331
HMDB0000791	1	8.79_288.2164m/z	288.216	8.79	L-Octanoylcarnitine	C15H29NO4	43.5	-2.00565	1.3542	0.396407	0.117232	0.311423
HMDB0240217	1	5.93_271.0744m/z	271.074	5.93	3-(Cystein-S-yl)acetaminophen	C11H14N2O4S	43.5	-1.3	2.09778	1.78292
24070	1	13.45_482.3598m/z	482.36	13.45	Lyso-PAFC-16	C24H52NO6P	43.6	-1.49323	8.05229	0.553924	0.194331	0.350949
HMDB0010387	1	11.88_518.3223m/z	518.322	11.88	LysoPC(18:3(6Z,9Z,12Z))	C26H48NO7P	43.6	-3.6	2.87678	1.74595	11.314	9.88852
HMDB0011518	1	12.52_502.2919m/z	502.292	12.52	LysoPE(20:4(8Z,11Z,14Z,17Z)/0:0)	C32H39NO4	43.7	-6.50012	5.32024	1.51644	7.01425	4.70715
HMDB0004627	1	15.21_317.2461m/z	317.246	15.21	Calusterone	C21H32O2	43.8	-4.38954	1.23065	1.93177	28.0354	217.957
HMDB0015064	1	13.90_383.2783m/z	383.278	13.9	Misoprostol	C22H38O5	43.9	-2.27481	3.63783	37.5924	5.84707	0.358554
HMDB0061642	1	11.39_416.3365m/z	416.337	11.39	3-hydroxyhexadecanoylcarnitine	C23H45NO5	44.1	-1.4	2.39026	0.0843566	0.0108533	0.120884
HMDB0029668	1	12.74_209.1526m/z	209.153	12.74	Eremopetasinorol	C13H20O2	44.2	-4.9	1.11067	1.83918	3.3302	1.88649
HMDB0011484	1	12.99_504.3075m/z	504.308	12.99	LysoPE(0:0/20:3(11Z,14Z,17Z))	C25H46NO7P	44.2	-2	1.09064		4.62741	4.11636
HMDB0031641	1	2.09_72.0803m/z	72.0803	2.09	Pyrrolidine	C4H9N	44.4	-6.6	2.35081	1.60305
HMDB0011494	1	12.78_528.3073m/z	528.307	12.78	LysoPE(0:0/22:5(4Z,7Z,10Z,13Z,16Z))	C27H46NO7P	44.5	-2.3	2.31555	1.63241	3.87934	2.39645
HMDB0000848	1	13.07_428.3721m/z	428.372	13.07	Stearoylcarnitine	C25H49NO4	44.5	-3	4.24285	0.161816	0.213394
HMDB0011504	1	12.06_452.2781m/z	452.278	12.06	LysoPE(16:1(9Z)/0:0)	C21H42NO7P	44.6	2.04785	2.0144		2.30007	1.96676
HMDB0011507	1	12.49_478.2917m/z	478.292	12.49	LysoPE(18:2(9Z,12Z)/0:0)	C23H44NO7P	44.6	6.66904	2.26528		4.04976	4.7855
HMDB0008951	1	15.64_702.5356m/z	702.536	15.64	PE(16:0/P-18:1(11Z))	C39H76NO7P	44.6	-10.8	10.004		1.58467
HMDB0034126	1	9.91_297.0754m/z	297.075	9.91	Gyrocyanin	C17H12O5	44.8	-1.18462	1.01974	15.0726	5.70686	0.387209
HMDB0062714	1	10.89_573.3017m/z	573.302	10.89	1-hexadecanoyl-sn-glycero-3-phospho-D-myo-inositol	C25H49O12P	44.9	4.50124	1.11789	1.65303	1.73428
HMDB0094687	1	12.50_426.3570m/z	426.357	12.5	Octadecenoylcarnitine	C25H47NO4	45	-1.8	9.40083	0.144054	0.0645547	0.451507
HMDB0000736	1	6.31_232.1545m/z	232.155	6.31	Isobutyryl-L-carnitine	C11H21NO4	45	0.629046	8.57623		0.409977	0.391218
HMDB0035639	1	13.63_235.1679m/z	235.168	13.63	Petasalbin	C15H22O2	45.2	-5.90163	2.09295	1.65022	2.27561
HMDB0031179	1	5.68_156.1371m/z	156.137	5.68	2,2,6,6-Tetramethyl-4-piperidinone	C9H17NO	45.3	-7.4	1.36555	1.88088	2.18249
HMDB0060507	1	5.90_350.1009m/z	350.101	5.9	S-(Formylmethyl)glutathione	C12H19N3O7S	45.3	-2.2	1.98135	2.73998		0.51486
HMDB0008911	1	13.59_752.5159m/z	752.516	13.59	PE(15:0/22:5(4Z,7Z,10Z,13Z,16Z))	C42H74NO8P	45.4	-8.7	13.4939	113.057	11.6405	0.265127
HMDB0001423	1	5.90_768.1211m/z	768.121	5.9	CoenzymeA	C21H36N7O16P3S	45.6	-1.8	1.70867			0.523993
HMDB0061693	1	12.15_599.3172m/z	599.317	12.15	1-Oleoylglycerophosphoinositol	C27H51O12P	45.6	-3.1	3.43658	1.7244		0.620575
HMDB0037845	1	5.64_344.1324m/z	344.132	5.64	N-(1-Deoxy-1-fructosyl)tyrosine	C15H21NO8	45.7	-4.7	1.19791		3.7016	1.95659
HMDB0011482	1	12.74_508.3385m/z	508.339	12.74	LysoPE(0:0/20:1(11Z))	C25H50NO7P	46.1	-2.5	4.17496	1.93914	7.07901	4.48096
HMDB0000222	1	12.32_400.3427m/z	400.343	12.32	L-Palmitoylcarnitine	C23H45NO4	46.1	1.35341	10.4125	0.262089	0.137519	0.548545
HMDB0062357	1	13.62_309.2054m/z	309.205	13.62	(6E,8E,10R,12Z)-10-Hydroxy-3-oxooctadecatrienoicacid	C18H28O4	46.2	-2.19548	1.9054		4.51055	2.94637
HMDB0000078	1	2.39_179.0477m/z	179.048	2.39	Cysteinylglycine	C5H10N2O3S	46.2	-4.70658	6.53256	1.78891
HMDB0034450	1	11.96_195.1371m/z	195.137	11.96	Neocnidilide	C12H18O2	46.3	-4.21902	1.23632		2.20198	1.52405
HMDB0000228	1	5.03_95.0483m/z	95.0483	5.03	Phenol	C6H6O	46.3	-8.45686	1.73102	1.59153
HMDB0112461	1	13.49_840.5671m/z	840.567	13.49	PS(18:3(6Z,9Z,12Z)/22:1(13Z))	C46H82NO10P	46.6	-9.3	7.68553	108.211	10.457	0.25719
HMDB0012453	1	14.30_417.3346m/z	417.335	14.3	3beta-Hydroxy-5-cholestenoate	C27H44O3	46.6	-4.23544	1.251		0.490681	0.584625
HMDB0008918	1	14.85_688.5194m/z	688.519	14.85	PE(15:0/P-18:1(11Z))	C38H74NO7P	46.6	-11.9	7.29571		1.58604
HMDB0061679	1	6.17_184.0960m/z	184.096	6.17	3,4,5,6-Tetrahydrohippuricacid	C9H13NO3	46.6	-4.60767	1.76896	1.59833
HMDB0010382	1	13.06_496.3394m/z	496.339	13.06	LysoPC(16:0)	C24H50NO7P	46.8	-0.740764	13.7417		2.25842	2.05904
HMDB0000651	1	9.74_316.2475m/z	316.248	9.74	Decanoylcarnitine	C17H33NO4	47	-2.21727	1.36636	0.353642	0.107434	0.305109
HMDB0038154	1	12.61_269.1739m/z	269.174	12.61	3,11,12-Trihydroxy-1(10)-spirovetiven-2-one	C15H24O4	47.3	-3.1829	1.11948	1.82938	2.44878
HMDB0010396	1	12.56_544.3389m/z	544.339	12.56	LysoPC(20:4(8Z,11Z,14Z,17Z))	C28H50NO7P	47.4	-1.6	8.46784	1.91723	12.0729	6.89172
24068	1	13.79_510.3562m/z	510.356	13.79	1-heptadecanoyl-sn-glycero-3-phosphocholine	C25H52NO7P	47.4	1.58101	1.64418	0.542108		2.69927
HMDB0011172	1	5.98_247.1281m/z	247.128	5.98	gamma-Glutamylvaline	C10H18N2O5	47.4	-2.99661	1.64679	2.40117		0.610927
HMDB0002815	1	13.20_522.3548m/z	522.355	13.2	LysoPC(18:1(9Z))	C26H52NO7P	47.4	-1.2	6.32635	1.74872
HMDB0000824	1	5.82_218.1384m/z	218.138	5.82	Propionylcarnitine	C10H19NO4	47.5	-1.20969	6.53875	0.586793	0.131574	0.230643
20694	1	7.00_407.2643m/z	407.264	7	LysIlePhe	C21H34N4O4	47.7	-2.53448	1.64418		1.63784	1.94054
HMDB0059946	1	14.11_259.1895m/z	259.19	14.11	2-Hydroxypropyl2-isopropyl-5-methylcyclohexylcarbonate	C14H26O4	47.7	-3.40679	3.20431		5.73286	3.21203
HMDB0041993	1	6.74_246.1699m/z	246.17	6.74	Pivaloylcarnitine	C12H23NO4	47.8	-0.3649	9.61812		0.430495	0.317411
HMDB0005066	1	11.49_372.3112m/z	372.311	11.49	Tetradecanoylcarnitine	C21H41NO4	47.9	0.88098	7.36544	0.26263	0.0619964	0.258631
HMDB0036626	1	6.06_149.0588m/z	149.059	6.06	3,4-Dihydro-2H-1-benzopyran-2-one	C9H8O2	48.2	-5.98937	1.74322	1.5038
HMDB0000719	1	1.23_120.0643m/z	120.064	1.23	L-Homoserine	C4H9NO3	48.2	-9.88298	1.48511	1.61178
HMDB0028921	1	5.66_260.1593m/z	260.159	5.66	Isoleucyl-Gamma-glutamate	C11H21N3O4	48.8	-4.4791	1.20842	1.65151	1.54491
HMDB0003355	1	2.09_118.0856m/z	118.086	2.09	5-Aminopentanoicacid	C5H11NO2	48.8	-5.72787	2.93451	1.58384		0.662154
HMDB0000062	1	1.29_162.1119m/z	162.112	1.29	L-Carnitine	C7H15NO3	48.9	-3.30412	4.6525		0.495162	0.491705
HMDB0034438	1	9.64_287.0909m/z	287.091	9.64	(R)-Pabulenol	C16H14O5	49	-1.74491	1.56785	106.724	210.167	12.6209
HMDB0059837	1	15.33_119.0845m/z	119.085	15.33	Indane	C9H10	49	-8.6	1.82367		4.74489	2.44572
HMDB0029440	1	5.83_162.0573m/z	162.057	5.83	trans-S-(1-Propenyl)-L-cysteine	C6H11NO2S	49.6	-6.10056	1.12699		2.99081	2.08689
HMDB0002250	1	10.62_344.2790m/z	344.279	10.62	Dodecanoylcarnitine	C19H37NO4	49.9	-1.42078	2.62744	0.347598	0.0704102	0.207828
956	1	1.46_204.1225m/z	204.123	1.46	Acetylcarnitine	C9H17NO4	50.5	-2.78318	6.43273	0.474066	0.229493	0.490108
HMDB0037846	1	6.05_328.1381m/z	328.138	6.05	N-(1-Deoxy-1-fructosyl)phenylalanine	C15H21NO7	51	-2.9	1.25033		1.83051
HMDB0029817	1	12.52_167.0698m/z	167.07	12.52	Ethylsalicylate	C9H10O3	51.7	-2.92042	2.55538	1.86139	2.44729
274	1	1.28_137.0701m/z	137.07	1.28	Trigonellinamide	C7H8N2O	51.9	-6.01635	3.693	6.95416	6.47826
HMDB0061715	1	2.12_162.0749m/z	162.075	2.12	Glutamate,gamma-methylester	C6H11NO4	52.7	-7.08271	1.60171	4.37812	4.09673	2.91829
HMDB0000308	1	12.61_375.2881m/z	375.288	12.61	3b-Hydroxy-5-cholenoicacid	C24H38O3	52.9	-3.4	2.59032	90.9848	11.6715	0.266375
HMDB0040730	1	12.52_195.1009m/z	195.101	12.52	Butylsalicylate	C11H14O3	52.9	-3.22442	2.10893	1.81149	2.3919
HMDB0000125	1	2.37_308.0909m/z	308.091	2.37	Glutathione	C10H17N3O6S	52.9	-0.634135	26.2437	1.83057		0.65033
44894	1	12.22_288.1986m/z	288.199	12.22	CAY10444	C15H29NO2S	53.7	-2.13425	2.62491	1.84301	3.03101	1.6287
71442	1	15.33_135.0794m/z	135.079	15.33	Chavicol	C9H10O	53.7	-7.42522	2.09827		5.53924	2.82969
HMDB0002007	1	12.61_357.2782m/z	357.278	12.61	Tetracosahexaenoicacid	C24H36O2	54.9	-1.7059	8.44493	163.091	18.1848	0.248813
8	1	1.32_114.0652m/z	114.065	1.32	Creatinine	C4H7N3O	55	-8.73504	1.12687	1.53341
17167	1	6.58_359.2278m/z	359.228	6.58	IleGlnVal	C16H30N4O5	55.1	-3.16077	1.34988	1.87515	1.90559
315	1	5.78_152.0558m/z	152.056	5.78	Guanine	C5H5N5O	55.2	-5.9585	1.44173	0.654297	0.397754
64742	1	8.29_243.0870m/z	243.087	8.29	Lumichrome	C12H10N4O2	55.5	-2.72738	1.63191		2.12793	4.76882
85196	1												6.91_476.1699m/z	476.17	6.91	Pralatrexate	C23H23N7O5	39.6	2.30165	1.60696		25.4008
133162	1												13.67_564.2391m/z	564.239	13.67	GluArgPheAsp	C24H35N7O9	39.6	-5.82416	1.21772			7.14759
65342	1												6.32_385.1394m/z	385.139	6.32	Val-HoPhe-OH	C20H22N2O6	39.7	-2.74814	2.81909	2.07855		0.549981
HMDB0003933	1												6.72_377.1918m/z	377.192	6.72	Pentosidine	C17H26N6O4	40.2	-6.63769	1.10941	1.94337		0.526222
HMDB0000905	1												5.24_330.0606m/z	330.061	5.24	Deoxyadenosinemonophosphate	C10H14N5O6P	40.3	-0.780816	1.28614		35.8416	283.469
HMDB0039084	1												5.56_407.1718m/z	407.172	5.56	3-O-MethylniveusinA	C21H28O8	40.6	1.59627	4.56968	1.68452
HMDB0041700	1												0.84_313.1118m/z	313.112	0.84	6-Hydroxyenterolactone	C18H18O5	40.6	11.5996	1.15632	2.34807	4.41363
HMDB0140837	1												8.63_578.1606m/z	578.161	8.63	5,7-dihydroxy-2-(4-hydroxyphenyl)-3-[(3,4,5-trihydroxy-6-{[(3,4,5-trihydroxy-6-methyloxan-2-yl)oxy]methyl}oxan-2-yl)oxy]-1Î»â´-chromen-1-ylium	C27H31O14+	40.9	-6.08887	1.29291	15.253
65354	1												5.46_447.1550m/z	447.155	5.46	HoPhe-HoPhe-OH	C25H24N2O6	41	-2.48294	1.32413		69.6258	45.0446
HMDB0009195	1												8.01_730.4519m/z	730.452	8.01	PE(18:4(6Z,9Z,12Z,15Z)/18:4(6Z,9Z,12Z,15Z))	C41H66NO8P	41.2	8.94168	2.74366	0.324959	0.0719499	0.221298
HMDB0124935	1												7.08_725.1936m/z	725.194	7.08	6-[(2-{4-[(3-{[3,4-dihydroxy-4-(hydroxymethyl)oxolan-2-yl]oxy}-4,5-dihydroxy-6-(hydroxymethyl)oxan-2-yl)oxy]phenyl}-4-oxo-3,4-dihydro-2H-1-benzopyran-7-yl)oxy]-3,4,5-trihydroxyoxane-2-carboxylicacid	C32H38O19	41.4	0.209219	1.14277		16.3506
160867	1												6.09_500.3075m/z	500.308	6.09	IleGluLeuLys	C23H43N5O7	41.4	-2.96949	1.55503	0.389549	0.41265
HMDB0125449	1												9.43_371.0588m/z	371.059	9.43	6-{[3-(3,4-dihydroxyphenyl)-2-oxopropanoyl]oxy}-3,4,5-trihydroxyoxane-2-carboxylicacid	C15H16O11	41.9	-8.55754	4.26582		0.482532	0.644585
2528	1												5.37_255.0442m/z	255.044	5.37	N1,N4-Diacetylsulfanilamide	C10H12N2O4S	42	-1.04737	1.68245	16.6635	10.2473	0.615923
HMDB0011503	1												10.89_452.2770m/z	452.277	10.89	LysoPE(16:0/0:0)	C21H44NO7P	42.6	-2.6886	1.80421		2.86384	5.28759
HMDB0000034	1												5.33_134.0472m/z	134.047	5.33	Adenine	C5H5N5	43	-0.143974	5.45394	0.332239	0.63405
HMDB0013243	1												6.09_277.1551m/z	277.155	6.09	Leucyl-phenylalanine	C15H22N2O3	43.3	-2.5251	1.02763			0.503922
HMDB0060617	1												7.61_351.1011m/z	351.101	7.61	Penicilloicacid	C16H20N2O5S	43.5	-2.58294	2.59571		3.04166
HMDB0038378	1												7.22_629.3515m/z	629.351	7.22	GoshonosideF7	C32H54O12	44.2	-4.37628	1.3813		1.78404
HMDB0001999	1												14.13_301.2166m/z	301.217	14.13	Eicosapentaenoicacid	C20H30O2	45.6	-2.23658	1.25402		5.44595	6.46595
HMDB0061691	1												12.63_466.2927m/z	466.293	12.63	1-Heptadecanoylglycerophosphoethanolamine	C22H46NO7P	45.7	-2.58463	1.25946		11.9742	17.9449
HMDB0000121	1												5.77_440.1316m/z	440.132	5.77	Folicacid	C19H19N7O6	46.1	-1.79088	3.84157		59.6134	320.312
HMDB0000094	1												0.77_191.0196m/z	191.02	0.77	Citricacid	C6H8O7	46.1	-0.431287	1.48955	0.343104	0.312489
HMDB0059614	1												7.35_437.0858m/z	437.086	7.35	Riboflavincyclic-4',5'-phosphate	C17H19N4O8P	46.2	-2.16609	1.96783		0.513232
HMDB0031436	1												2.88_94.9804m/z	94.9804	2.88	Silicicacid	H4O4Si	46.5	-2.45584	1.11622		0.0881219	0.080432
HMDB0128947	1												0.87_277.0729m/z	277.073	0.87	8-(1,2-dihydroxypropan-2-yl)-9-hydroxy-2H,8H,9H-furo[2,3-h]chromen-2-one	C14H14O6	46.6	4.10072	1.22686		3.29356	2.16107
HMDB0011477	1												11.40_476.2774m/z	476.277	11.4	LysoPE(0:0/18:2(9Z,12Z))	C23H44NO7P	46.7	-1.78418	1.3748	0.315702	4.26182	13.5423
HMDB0011129	1												13.29_480.3093m/z	480.309	13.29	LysoPE(0:0/18:0)	C23H48NO7P	46.8	-0.475101	4.2576		4.75091	8.56211
HMDB0000288	1												0.95_323.0282m/z	323.028	0.95	Uridine5'-monophosphate	C9H13N2O9P	47.3	-1.35841	4.40346		15.919	5.27191
HMDB0011478	1												11.00_474.2614m/z	474.261	11	LysoPE(0:0/18:3(6Z,9Z,12Z))	C23H42NO7P	47.7	-2.55995	1.19452	0.175608		16.227
HMDB0060013	1												5.65_203.0023m/z	203.002	5.65	O-methoxycatechol-O-sulphate	C7H8O5S	48.1	1.41992	5.03835		3.22895e+07	7.54888e+06
HMDB0000061	1												0.98_426.0213m/z	426.021	0.98	Adenosine3',5'-diphosphate	C10H15N5O10P2	48.2	-1.91339	8.56876		4.04626
HMDB0011519	1												11.06_498.2621m/z	498.262	11.06	LysoPE(20:5(5Z,8Z,11Z,14Z,17Z)/0:0)	C25H42NO7P	48.4	-1.10206	4.8047		9.3704	12.1209
HMDB0000299	1												2.50_283.0678m/z	283.068	2.5	Xanthosine	C10H12N4O6	48.7	-1.99027	1.22735	0.399907	0.0213142	0.0506763
HMDB0112341	1												11.38_830.5916m/z	830.592	11.38	PS(15:0/24:1(15Z))	C45H86NO10P	48.8	-0.0235898	3.83191	2.4563
HMDB0035722	1												10.43_293.1756m/z	293.176	10.43	TanacetolA	C17H26O4	49	-0.871417	2.5035		2.97511	2.15347
HMDB0028804	1												5.13_292.1300m/z	292.13	5.13	Glutaminylphenylalanine	C14H19N3O4	49.4	-0.87631	2.14778	1.80309
HMDB0062175	1												7.44_236.0931m/z	236.093	7.44	N-lactoyl-Phenylalanine	C12H15NO4	49.6	1.08883	2.53357		0.465356	0.494284
HMDB0060015	1												2.75_172.9916m/z	172.992	2.75	Phenolsulphate	C6H6O4S	49.6	0.992587	1.97722		0.216413
2203	1												3.42_166.0508m/z	166.051	3.42	Pyridoxal(VitaminB6)	C8H9NO3	50.2	-1.02768	1.28423		195.849	641.904
HMDB0033903	1												2.60_150.0560m/z	150.056	2.6	3alpha,4,7,7alpha-Tetrahydro-1H-isoindole-1,3(2H)-dione	C8H9NO2	50.4	-0.591966	2.46639		0.000318545	0.000248998
HMDB0001545	1												2.75_166.0507m/z	166.051	2.75	Pyridoxal	C8H9NO3	50.6	-1.40782	1.47214		0.00975388	0.00909492
HMDB0000085	1												5.33_266.0896m/z	266.09	5.33	Deoxyguanosine	C10H13N5O4	50.6	0.363544	6.96959	0.299651	0.358719
HMDB0030669	1												0.87_367.1052m/z	367.105	0.87	3-O-Feruloylquinicacid	C17H20O9	50.7	4.83549	2.65048		1.67383	1.76309
HMDB0000329	1												10.01_163.0762m/z	163.076	10.01	2-Phenylbutyricacid	C10H12O2	50.8	-1.43123	1.36083		2.45622
HMDB0000594	1												5.67_293.1125m/z	293.113	5.67	gamma-Glutamylphenylalanine	C14H18N2O5	51.4	-6.01025	1.22999		60.2704	18.2809
HMDB0035178	1												2.60_168.0666m/z	168.067	2.6	6-Acetyl-2,3-dihydro-2-(hydroxymethyl)-4(1H)-pyridinone	C8H11NO3	51.7	-0.0523751	2.99658		0.00106288	0.0009362
HMDB0000296	1												2.57_243.0623m/z	243.062	2.57	Uridine	C9H12N2O6	51.7	0.277246	3.36979		2.21171	1.87928
HMDB0029394	1												5.54_392.1125m/z	392.113	5.54	gamma-L-Glutamyl-S-(2-carboxy-1-propyl)cysteinylglycine	C14H23N3O8S	52.8	-2.17507	1.68832		1176.03	982.187
HMDB0000755	1												2.44_181.0502m/z	181.05	2.44	Hydroxyphenyllacticacid	C9H10O4	52.8	-2.57938	1.14464	0.467952	0.00474982	0.0105295
HMDB0029417	1												5.51_176.0385m/z	176.038	5.51	Cycloalliin	C6H11NO3S	53.5	-1.29323	1.13721		2.66326e+07	1010.66
HMDB0011745	1												2.61_190.0537m/z	190.054	2.61	N-Acetyl-L-methionine	C7H13NO3S	53.8	-3.248	1.24006	2.26454	0.000538161	0.000239384
HMDB0029576	1												0.96_133.0504m/z	133.05	0.96	2,3-Dihydroxy-2-methylbutanoicacid	C5H10O4	55	-1.86325	1.58289	0.140636	0.0519685
101	1												2.56_662.1022m/z	662.102	2.56	Nicotinamideadeninedinucleotide(NAD)	C21H27N7O14P2	56	0.567826	3.64413		0.022994	0.0246136
HMDB0000387	1												11.16_215.1651m/z	215.165	11.16	3-Hydroxydodecanoicacid	C12H24O3	58.1	-0.787872	1.34296	0.162652	0.0758702
HMDB0036425	1																							0.75_385.2732m/z	385.273	0.75	Persicachrome	C25H36O3	40	-1.30247	1.40951		5.26012	4.21516
HMDB0007982	1																							0.86_782.5691m/z	782.569	0.86	PC(16:0/20:4(5Z,8Z,11Z,14Z))	C44H80NO8P	40	-0.42269	6.34204		3.71014	3.80211
HMDB0008450	1																							0.85_856.5821m/z	856.582	0.85	PC(20:4(5Z,8Z,11Z,14Z)/22:5(4Z,7Z,10Z,13Z,16Z))	C50H82NO8P	40.1	-3.5254	2.07907		5.76023	3.52725
HMDB0008090	1																							0.85_832.5843m/z	832.584	0.85	PC(18:1(11Z)/22:6(4Z,7Z,10Z,13Z,16Z,19Z))	C48H82NO8P	40.2	-0.890072	2.51004		2.06028	2.06205
HMDB0008057	1																							0.85_834.5990m/z	834.599	0.85	PC(18:0/22:6(4Z,7Z,10Z,13Z,16Z,19Z))	C48H84NO8P	40.5	-2.10354	3.64877		3.17252	2.7368
HMDB0006049	1																							11.88_262.0493m/z	262.049	11.88	O-Phosphotyrosine	C9H12NO6P	40.7	7.05766	1.15015	1.91141	2.18124
HMDB0010407	1																							1.20_480.3428m/z	480.343	1.2	LysoPC(P-16:0)	C24H50NO6P	40.8	-4.29349	1.12745	0.384487
HMDB0011212	1																							6.90_740.5536m/z	740.554	6.9	PC(P-16:0/18:3(6Z,9Z,12Z))	C42H78NO7P	40.9	-7.16549	1.27225		0.0853277
HMDB0008133	1																							0.88_758.5697m/z	758.57	0.88	PC(18:2(9Z,12Z)/16:0)	C42H80NO8P	41.2	0.382471	7.50902		1.83172	1.80956
HMDB0007869	1																							0.89_706.5385m/z	706.538	0.89	PC(14:0/16:0)	C38H76NO8P	41.8	0.480332	3.56509		2.03369
HMDB0001235	1																							7.80_296.0649m/z	296.065	7.8	5-Aminoimidazoleribonucleotide	C8H14N3O7P	42.1	2.22185	1.03718	2.22105	3.75692	1.70292
HMDB0039528	1																							6.28_766.5665m/z	766.567	6.28	2-O-(5,8,11,14,17-Eicosapentaenoyl)-1-O-hexadecylglycero-3-phosphocholine	C44H80NO7P	42.3	-10.4922	2.04443		0.113164
65203	1																							8.11_365.1055m/z	365.106	8.11	Ser-His-OH	C15H16N4O7	42.6	-10.2135	4.84985		1.95791	1.67419
HMDB0013407	1																							6.95_768.5829m/z	768.583	6.95	PC(o-16:0/20:4(8Z,11Z,14Z,17Z))	C44H82NO7P	42.7	-9.40695	2.21162		0.105269
HMDB0041454	1																							0.73_391.2839m/z	391.284	0.73	D8'-MerulinicacidA	C24H38O4	43.2	-1.04421	4.37191	0.469439
HMDB0116782	1																							0.73_884.5416m/z	884.542	0.73	PS(22:4(7Z,10Z,13Z,16Z)/22:6(4Z,7Z,10Z,13Z,16Z,19Z))	C50H78NO10P	43.6	-2.27258	2.75874		26.7842	12.9574
HMDB0059786	1																							13.57_876.4303m/z	876.43	13.57	Gliadorphin	C43H57N9O11	43.9	5.98149	2.57276		0.184655	0.222642
HMDB0000267	1																							7.49_130.0498m/z	130.05	7.49	Pyroglutamicacid	C5H7NO3	44.1	-0.776318	3.37826	1.52542	1.55114
HMDB0013464	1																							0.89_703.5732m/z	703.573	0.89	SM(d18:0/16:1(9Z))	C39H79N2O6P	44.2	-2.41075	5.70413		2.32777	2.16776
HMDB0001546	1																							13.63_404.0240m/z	404.024	13.63	CDP	C9H15N3O11P2	44.3	-3.65401	1.21992	1.98918
HMDB0041525	1																							7.20_247.0577m/z	247.058	7.2	CoriandroneC	C13H10O5	44.6	-9.73988	1.48347		0.550359
HMDB0008082	1																							6.90_808.5812m/z	808.581	6.9	PC(18:1(11Z)/20:4(8Z,11Z,14Z,17Z))	C46H82NO8P	44.9	-4.829	3.22153		0.133853
HMDB0039386	1																							11.35_491.2092m/z	491.209	11.35	Cymorcindiglucoside	C18H30N6O10	45.6	-0.807633	2.48925		0.459848	0.510445
HMDB0007883	1																							6.22_754.5349m/z	754.535	6.22	PC(14:0/20:4(5Z,8Z,11Z,14Z))	C42H76NO8P	45.6	-4.34037	2.64075		0.196916
HMDB0112718	1																							0.81_840.5681m/z	840.568	0.81	PS(22:0/18:4(6Z,9Z,12Z,15Z))	C46H82NO10P	45.9	-8.07238	3.02081		3.27934
HMDB0003334	1																							9.61_203.1498m/z	203.15	9.61	Symmetricdimethylarginine	C8H18N4O2	46.4	-2.04317	2.31972		0.549265
18797	1																							8.08_361.2062m/z	361.206	8.08	GlnThrIle	C15H28N4O6	46.4	-5.35533	1.20147	0.341766	0.170875
HMDB0008753	1																							0.85_816.5916m/z	816.592	0.85	PC(22:6(4Z,7Z,10Z,13Z,16Z,19Z)/P-18:1(11Z))	C48H82NO7P	46.7	1.80052	1.70783	0.593543
HMDB0011353	1																							0.89_724.5252m/z	724.525	0.89	PE(P-16:0/20:4(8Z,11Z,14Z,17Z))	C41H74NO7P	46.9	-3.3024	2.8		2.43826	2.93306
16048	1																							10.94_357.2487m/z	357.249	10.94	IleProLys	C17H32N4O4	47.1	-2.56042	1.06754	1.67672
HMDB0240262	1																							0.89_496.3382m/z	496.338	0.89	LysoPC(0:0/16:0)	C24H50NO7P	47.4	-3.12574	2.50117			2.08684
HMDB0000201	1																							4.76_204.1229m/z	204.123	4.76	L-Acetylcarnitine	C9H17NO4	47.8	-0.604552	4.46851	0.451718	0.191817
HMDB0028817	1																							10.67_276.1181m/z	276.118	10.67	Glutamylglutamine	C10H17N3O6	48	-3.41973	0.981707	0.440043		1.8845
45035	1																							8.11_110.0705m/z	110.07	8.11	4-PyrimidineMethanamine(hydrochloride)	C5H7N3	48	-7.19939	1.47348		2.01445
HMDB0000052	1																							12.18_291.1296m/z	291.13	12.18	Argininosuccinicacid	C10H18N4O6	48.1	-1.00615	2.16345	1.95753		0.470084
HMDB0015186	1																							3.69_335.1056m/z	335.106	3.69	PenicillinG	C16H18N2O4S	48.8	-1.17168	3.65581		2.80133
HMDB0014581	1																							2.42_137.0447m/z	137.045	2.42	Allopurinol	C5H4N4O	48.9	-8.15619	1.38318	0.630351	0.0898476	0.142645
HMDB0005065	1																							1.15_426.3561m/z	426.356	1.15	Oleoylcarnitine	C25H47NO4	48.9	-4.04265	1.22225	0.109728	0.0231258	0.213071
21169	1																							8.63_361.1821m/z	361.182	8.63	GlyGluArg	C13H24N6O6	48.9	-2.51613	1.16288	0.547636	0.406847
HMDB0000734	1																							3.02_188.0704m/z	188.07	3.02	Indoleacrylicacid	C11H9NO2	49.3	-1.24512	3.74538	1.53264
HMDB0059711	1																							3.78_137.0705m/z	137.071	3.78	2-Methylnicotinamide	C7H8N2O	49.6	-3.20121	3.8417	7.19868	12.7276	1.77348
HMDB0002013	1																							2.89_232.1545m/z	232.155	2.89	Butyrylcarnitine	C11H21NO4	49.8	0.611205	6.4969		0.415409	0.417627
HMDB0003411	1																							4.76_116.0703m/z	116.07	4.76	D-Proline	C5H9NO2	50.2	-2.97711	2.48377		0.624319	0.601479
56	1																							2.47_104.1068m/z	104.107	2.47	Choline	C5H13NO	50.4	-1.88741	3.55819		1.50613
HMDB0000378	1																							2.40_246.1699m/z	246.17	2.4	2-Methylbutyroylcarnitine	C12H23NO4	50.7	-0.366295	5.82081		0.407641	0.301025
43545	1																							7.70_160.1330m/z	160.133	7.7	METHACHOLINE	C8H17NO2	50.7	-1.40946	3.3686	0.557812	0.200576	0.35968
HMDB0061477	1																							0.75_838.5577m/z	838.558	0.75	PE(DiMe(11,3)/MonoMe(11,5))	C46H80NO10P	51.1	-1.8157	2.04797		2.56061	2.4854
HMDB0006831	1																							7.55_146.1171m/z	146.117	7.55	3-Dehydroxycarnitine	C7H15NO2	51.2	-2.89071	1.87438	0.570138	0.327861	0.575156
HMDB0011668	1																							8.24_342.1381m/z	342.138	8.24	6-(alpha-D-Glucosaminyl)-1D-myo-inositol	C13H19N5O6	51.2	-8.00026	1.25298		0.577033
85175	1																							1.19_372.3096m/z	372.31	1.19	(±)-Myristoylcarnitine	C21H41NO4	51.5	-3.34026	1.52414	0.243963	0.0208393	0.086552
HMDB0000403	1																							3.38_152.0558m/z	152.056	3.38	2-Hydroxyadenine	C5H5N5O	51.7	-5.72529	1.84362	0.195991	0.15563
85176	1																							3.72_218.1385m/z	218.138	3.72	(±)-Propionylcarnitine	C10H19NO4	51.7	-1.02932	4.70797	0.513876	0.10527	0.205699
HMDB0028901	1																							6.60_288.2023m/z	288.202	6.6	Isoleucyl-Arginine	C12H25N5O3	52.4	-2.46445	2.76749		4.02947	3.20356
HMDB0001413	1																							11.11_489.1140m/z	489.114	11.11	Citicoline	C14H26N4O11P2	52.5	-1.2893	2.43394	1.92382	1.91194
HMDB0001129	1																							3.19_222.0961m/z	222.096	3.19	N-Acetylmannosamine	C8H15NO6	52.7	-5.03016	1.20578	0.197216	0.357297	1.82028
HMDB0003423	1																							7.48_147.0764m/z	147.076	7.48	D-Glutamine	C5H10N2O3	52.7	-0.403601	2.37936	1.52695	1.51139
HMDB0006722	1																							0.75_401.3403m/z	401.34	0.75	25-Hydroxytachysterol3	C27H44O2	52.9	-2.87933	2.09044	0.575066
HMDB0029033	1																							9.61_262.1502m/z	262.15	9.61	Serylarginine	C9H19N5O4	53	-2.81972	1.00758		1.53559	1.53652
HMDB0006483	1																							9.51_134.0439m/z	134.044	9.51	D-Asparticacid	C4H7NO4	53.4	-6.46326	1.82452	2.52216	2.06765
HMDB0037843	1																							8.41_282.1180m/z	282.118	8.41	N-(1-Deoxy-1-fructosyl)threonine	C11H15N5O4	53.9	-5.87427	1.05721		0.567374	0.65955
HMDB0034267	1																							8.11_156.0759m/z	156.076	8.11	L-2-Amino-3-(1-pyrazolyl)propanoicacid	C6H9N3O2	54.3	-5.54841	2.186		1.96852
HMDB0003609	1																							9.51_88.0384m/z	88.0384	9.51	2-Aminoacrylicacid	C3H5NO2	55.4	-10.3922	1.41055	4.6484	3.40279
HMDB0134728	1																							0.73_261.1477m/z	261.148	0.73	5-methyl-5-(4-methylpent-3-en-1-yl)-3,6-dioxatricyclo[5.4.0.0Â²,â´]undeca-1(7),8,10-trien-8-ol	C16H20O3	55.7	-3.02307	1.01998	0.373189
229	1																							4.65_265.1118m/z	265.112	4.65	Thiamine	C12H16N4OS	55.7	0.339035	3.48736		1.73346
3289	1																							11.99_399.1428m/z	399.143	11.99	S-Adenosylmethionine	C15H22N6O5S	55.8	-4.34644	1.19799	1.60005	2.83697	1.77148
HMDB0060680	1																							1.34_152.0698m/z	152.07	1.34	2-Amino-3-methylbenzoate	C8H9NO2	57.3	-5.18075	1.81602	1.57926
65534	1																							3.02_205.0965m/z	205.096	3.02	DL-Tryptophan	C11H12N2O2	58.3	-3.32877	2.05602	1.58921
HMDB0000806	1																																		0.84_227.2016m/z	227.202	0.84	Myristicacid	C14H28O2	39.9	-0.390452	1.30881	0.584952	0.615795
HMDB0116632	1																																		0.75_819.5184m/z	819.518	0.75	PG(22:6(4Z,7Z,10Z,13Z,16Z,19Z)/18:1(11Z))	C46H77O10P	39.9	0.245803	4.14445	0.438209
HMDB0000207	1																																		0.81_281.2487m/z	281.249	0.81	Oleicacid	C18H34O2	40	0.192561	3.85446	0.443215	0.5095
65012	1																																		0.70_433.1399m/z	433.14	0.7	HoPhe-Phe-OH	C24H22N2O6	40.1	-1.47934	1.58617		2.09932	1.7131
HMDB0009001	1																																		0.92_768.5500m/z	768.55	0.92	PE(18:0/20:3(5Z,8Z,11Z))	C43H80NO8P	40.1	-6.28985	1.22779		4.97183	6.63431
HMDB0060943	1																																		8.58_387.1132m/z	387.113	8.58	Sulfinpyrazonesulfide	C23H20N2O2S	40.1	-10.4319	1.80817		1.63305
HMDB0001328	1																																		11.35_563.0678m/z	563.068	11.35	dTDP-D-glucose	C16H26N2O16P2	40.3	-1.13705	4.23305	0.546318	0.459376
HMDB0000425	1																																		9.31_267.0718m/z	267.072	9.31	3-Deoxy-D-glycero-D-galacto-2-nonulosonicacid	C9H16O9	40.6	-1.22815	1.70516	0.672473	0.390951	0.580684
HMDB0000781	1																																		11.32_300.0384m/z	300.038	11.32	N-Acetylgalactosamine4-sulphate	C8H15NO9S	40.7	-3.4137	2.01706		0.277306	0.424076
45007	1																																		0.79_309.2791m/z	309.279	0.79	OleicAcidethylester	C20H38O2	41.3	-2.68913	1.21244	0.337481	0.17871
HMDB0010647	1																																		0.76_773.5341m/z	773.534	0.76	PG(18:2(9Z,12Z)/18:0)	C42H79O10P	41.3	0.400203	2.67016	0.372402	0.478235
HMDB0041638	1																																		11.73_481.1044m/z	481.104	11.73	(-)-Epigallocatechin3'-glucuronide	C21H22O13	41.4	11.6578	2.52992	0.520225	0.604424
HMDB0009058	1																																		6.64_742.5383m/z	742.538	6.64	PE(18:1(9Z)/18:1(11Z))	C41H78NO8P	41.4	-1.31399	1.40212		0.219984
HMDB0061690	1																																		2.97_619.2883m/z	619.288	2.97	1-Arachidonoylglycerophosphoinositol	C29H49O12P	41.7	-0.891472	2.19022	0.284564		6.87542
45180	1																																		9.87_231.0621m/z	231.062	9.87	Kifunensine	C8H12N2O6	42.3	-0.626684	1.88796	0.441874	0.574408
44171	1																																		0.75_339.1986m/z	339.199	0.75	NORETHINDRONEACETATE	C22H28O3	42.3	5.84731	1.23668	0.501984		3.64541
HMDB0061159	1																																		9.11_408.1623m/z	408.162	9.11	N-Carbamoylglucuronidelorcaserin	C21H28ClNO5	42.5	9.7653	1.1114	1.69744		0.426571
HMDB0010618	1																																		6.66_773.5333m/z	773.533	6.66	PG(18:1(11Z)/18:1(11Z))	C42H79O10P	42.5	-0.602543	1.41026		0.0439781
HMDB0003229	1																																		0.82_253.2168m/z	253.217	0.82	Palmitoleicacid	C16H30O2	43.3	-1.84564	1.15408	0.632004
HMDB0009385	1																																		0.92_738.5079m/z	738.508	0.92	PE(20:4(5Z,8Z,11Z,14Z)/16:0)	C41H74NO8P	43.4	0.000133236	1.76922		2.95278	4.67319
HMDB0039133	1																																		0.79_329.2472m/z	329.247	0.79	4,8,12,15,19-Docosapentaenoicacid	C22H34O2	43.7	-4.33117	1.45274		2.48841	2.43638
HMDB0038715	1																																		10.94_273.0378m/z	273.038	10.94	Alloathyriol	C14H10O6	43.8	-9.83073	1.76584	4.40488	3.47948
HMDB0002183	1																																		0.81_327.2322m/z	327.232	0.81	Docosahexaenoicacid	C22H32O2	43.9	-2.402	1.97078		2.41135	2.66939
HMDB0034899	1																																		9.99_433.1928m/z	433.193	9.99	1,1'-Ethylidenebistryptophan	C24H26N4O4	44	10.7772	1.32677	1.94002
HMDB0000290	1																																		11.35_606.0756m/z	606.076	11.35	Uridinediphosphate-N-acetylglucosamine	C17H27N3O17P2	44.4	2.18271	30.6154	0.499221	0.369098
362	1																																		9.25_218.0671m/z	218.067	9.25	O-Succinyl-L-homoserine	C8H13NO6	44.5	0.312465	1.72089		0.207994	0.343377
HMDB0035232	1																																		0.79_232.1702m/z	232.17	0.79	RotundineB	C15H23NO	44.5	-2.04	1.06845		4.88249	2.73596
HMDB0061704	1																																		3.04_599.3186m/z	599.319	3.04	2-Stearoylglycerophosphoinositol	C27H53O12P	44.7	-2.57952	2.49861	0.300038		4.32999
HMDB0009444	1																																		0.90_722.5135m/z	722.514	0.9	PE(20:4(8Z,11Z,14Z,17Z)/P-16:0)	C41H74NO7P	44.9	0.718487	3.55708		2.26335	3.41849
HMDB0112743	1																																		0.90_842.5916m/z	842.592	0.9	PS(22:1(13Z)/18:1(9Z))	C46H86NO10P	46.4	-0.0419972	2.58416	0.590982	2.49544	4.22502
HMDB0112722	1																																		1.17_868.6050m/z	868.605	1.17	PS(22:0/20:3(5Z,8Z,11Z))	C48H88NO10P	46.6	-2.622	1.10026		4.68714	5.9345
HMDB0059923	1																																		0.78_515.2634m/z	515.263	0.78	CavipetinEisomer2	C29H40O8	47.2	-3.27044	1.20134		2.45903	2.17582
HMDB0062573	1																																		11.87_565.0487m/z	565.049	11.87	UDP-D-galactose(2-)	C15H24N2O17P2	47.4	1.76736	11.3652	1.83497		0.543723
HMDB0000220	1																																		0.82_255.2330m/z	255.233	0.82	Palmiticacid	C16H32O2	47.8	0.0226979	4.07236	0.652865		1.69337
HMDB0112380	1																																		6.31_844.6067m/z	844.607	6.31	PS(18:0/22:1(13Z))	C46H88NO10P	47.8	-0.701264	2.13588		0.140686
HMDB0001095	1																																		12.19_588.0744m/z	588.074	12.19	GDP-L-fucose	C16H25N5O15P2	47.9	-0.891158	1.50099			0.634152
HMDB0000625	1																																		8.38_195.0509m/z	195.051	8.38	Gluconicacid	C6H12O7	47.9	-0.503166	4.69133	0.434572	0.349544
HMDB0133179	1																																		0.75_205.1596m/z	205.16	0.75	2-benzylheptan-1-ol	C14H22O	48.1	-0.827277	2.79313		3.13118	3.42604
HMDB0032549	1																																		0.76_311.1678m/z	311.168	0.76	N-Undecylbenzenesulfonicacid	C17H28O3S	48.2	-2.77344	1.56275		2.1408	2.79764
HMDB0240253	1																																		8.05_166.0180m/z	166.018	8.05	N-Acetyltaurine	C4H9NO4S	48.4	0.127584	2.5301		0.443662	0.574136
HMDB0112514	1																																		6.25_790.5584m/z	790.558	6.25	PS(20:0/16:0)	C42H82NO10P	48.4	-2.49077	1.41754		0.257125
HMDB0031031	1																																		0.76_325.1831m/z	325.183	0.76	2-Dodecylbenzenesulfonicacid	C18H30O3S	48.6	-3.5908	1.60423	0.61878	1.99586	3.24292
HMDB0112672	1																																		0.89_866.5921m/z	866.592	0.89	PS(20:4(8Z,11Z,14Z,17Z)/22:0)	C48H86NO10P	48.6	0.461754	2.9356		4.91749	5.82522
HMDB0062177	1																																		2.68_252.0871m/z	252.087	2.68	N-lactoyl-Tyrosine	C12H15NO5	48.9	-2.56559	1.26897	0.480779	0.250101	0.520847
HMDB0029954	1																																		7.09_239.0768m/z	239.077	7.09	D-glycero-L-galacto-Octulose	C8H16O8	49.1	-1.6312	1.44637		0.542447
HMDB0112732	1																																		0.89_892.6056m/z	892.606	0.89	PS(22:0/22:5(7Z,10Z,13Z,16Z,19Z))	C50H88NO10P	49.1	-1.86912	1.37351		3.87126	4.23461
HMDB0001200	1																																		3.36_235.0718m/z	235.072	3.36	N'-Formylkynurenine	C11H12N2O4	50.1	-2.62349	1.12736	0.150235	0.0513471
HMDB0062759	1																																		12.95_604.0700m/z	604.07	12.95	GDP-alpha-D-mannose(2-)	C16H25N5O16P2	50.4	0.210968	1.48696			0.650424
HMDB0030529	1																																		1.35_602.3452m/z	602.345	1.35	JanthitremE	C37H49NO6	50.5	-5.89215	1.40474	0.608324	5.86039	9.53081
HMDB0011505	1																																		1.46_478.2925m/z	478.293	1.46	LysoPE(18:1(11Z)/0:0)	C23H46NO7P	50.5	-2.97	2.12669			2.81775
HMDB0059626	1																																		11.15_300.0482m/z	300.048	11.15	N-acetyl-alpha-D-galactosamine1-phosphate	C8H16NO9P	51	-2.59859	2.66338	0.358436	0.250047
HMDB0060493	1																																		7.41_292.1035m/z	292.103	7.41	N-Acetylmuramate	C11H19NO8	51	-0.983673	1.04617	0.0985739	0.0142828	0.144317
HMDB0112713	1																																		3.94_844.6069m/z	844.607	3.94	PS(22:0/18:1(11Z))	C46H88NO10P	51	-0.474481	1.47522		0.210374
HMDB0000089	1																																		11.81_242.0798m/z	242.08	11.81	Cytidine	C9H13N3O5	51.1	6.50128	4.67992	4.66294	5.76244
HMDB0039960	1																																		5.25_367.1045m/z	367.104	5.25	3-O-Caffeoyl-4-O-methylquinicacid	C17H20O9	51.4	2.86583	4.13169		3.25519	2.42663
HMDB0112625	1																																		0.90_840.5773m/z	840.577	0.9	PS(20:3(8Z,11Z,14Z)/20:0)	C46H84NO10P	51.4	1.5827	2.5285		4.53107	6.34127
HMDB0000652	1																																		10.42_476.0706m/z	476.071	10.42	Chondroitin4-sulfate	C14H23NO15S	51.7	-1.98805	1.90374	4.68917	3.38886
HMDB0112516	1																																		6.28_818.5916m/z	818.592	6.28	PS(20:0/18:0)	C44H86NO10P	51.9	-0.0851644	2.6248		0.284977
HMDB0011737	1																																		12.54_275.0882m/z	275.088	12.54	gamma-Glutamylglutamicacid	C10H16N2O7	52.1	-1.16987	1.37504	2.28907	3.6272
44712	1																																		6.84_130.0619m/z	130.062	6.84	3-Guanidinopropanoate	C4H9N3O2	52.2	-2.45935	1.14576		0.503011	0.557236
HMDB0001202	1																																		10.54_306.0498m/z	306.05	10.54	dCMP	C9H14N3O7P	52.4	0.58726	1.45235	4.77768		0.216592
HMDB0041208	1																																		5.13_360.1293m/z	360.129	5.13	De-O-methylsimmondsin	C15H23NO9	52.5	-2.07638	6.10502	1.50478	1.89119
265	1																																		1.26_391.2846m/z	391.285	1.26	Deoxycholicacid	C24H40O4	52.6	-2.03141	4.36279		5.5936
HMDB0000812	1																																		9.69_174.0410m/z	174.041	9.69	N-Acetyl-L-asparticacid	C6H9NO5	52.6	0.950496	4.38006		0.630086
HMDB0000726	1																																		7.39_230.1030m/z	230.103	7.39	Isovalerylglutamicacid	C10H17NO5	52.7	-1.71963	1.27507	4.16078	2.63141
HMDB0028837	1																																		11.73_189.0517m/z	189.052	11.73	Glycyl-Aspartate	C6H10N2O5	53.1	-0.142783	1.58743	2.66967	1.79459
HMDB0001342	1																																		13.58_480.9803m/z	480.98	13.58	Thymidine5'-triphosphate	C10H17N2O14P3	53.2	-3.57926	1.56828	6.53386	3.91504
HMDB0001341	1																																		13.95_426.0206m/z	426.021	13.95	ADP	C10H15N5O10P2	53.3	-3.59066	3.41115	1.81409
HMDB0000250	1																																		10.21_176.9357m/z	176.936	10.21	Pyrophosphate	H4O7P2	53.9	-1.14128	1.56832		0.489568	0.582796
HMDB0000567	1																																		3.38_147.0449m/z	147.045	3.38	Cinnamicacid	C9H8O2	54.1	-1.66396	1.85209		1.6808
HMDB0112526	1																																		1.17_840.5757m/z	840.576	1.17	PS(20:0/20:3(5Z,8Z,11Z))	C46H84NO10P	54.3	-0.357175	1.97419		5.37059
HMDB0012422	1																																		1.26_812.5432m/z	812.543	1.26	PS(20:3(8Z,11Z,14Z)/18:0)	C44H80NO10P	54.4	-1.89965	1.15057			15.8275
HMDB0030852	1																																		0.82_285.0762m/z	285.076	0.82	Asperxanthone	C16H14O5	54.6	-2.29991	1.60462		1.23043e+08
HMDB0094716	1																																		4.39_160.0613m/z	160.061	4.39	hydroxybutyrylglycine	C6H11NO4	54.7	-1.69058	1.22416		0.266784	0.272264
HMDB0060509	1																																		11.71_289.0325m/z	289.033	11.71	Sedoheptulose1-phosphate	C7H15O10P	54.7	-1.87288	1.38828	0.571311
HMDB0000516	1																																		3.73_179.0559m/z	179.056	3.73	Beta-D-Glucose	C6H12O6	55	-1.1145	3.48946	1.61972
97	1																																		11.35_402.9936m/z	402.994	11.35	Uridinediphosphate(UDP)	C9H14N2O12P2	55.1	-3.16348	2.48396	0.550492	0.305277	0.559283
HMDB0033601	1																																		0.78_211.1338m/z	211.134	0.78	Dihydrojasmonicacid	C12H20O3	55.8	-0.619616	1.71211		2.02872	1.49219
34478	1																																		10.02_346.0558m/z	346.056	10.02	Adenosinemonophosphate	C10H14N5O7P	55.9	0.0957898	5.04247	0.51578
257	1																																		6.63_130.0511m/z	130.051	6.63	Trans-4-Hydroxy-L-proline	C5H9NO3	55.9	0.943765	1.44667		0.462953	0.476382
HMDB0000148	1																																		3.83_146.0455m/z	146.046	3.83	L-Glutamicacid	C5H9NO4	56.1	-2.27665	1.34788	0.29228	0.108744	0.368447
HMDB0062660	1																																		3.19_160.0614m/z	160.061	3.19	N-methyl-L-glutamicAcid	C6H11NO4	56.1	-0.919533	1.18669	0.22473	0.0518463	0.237636
HMDB0060467	1																																		11.56_259.0224m/z	259.022	11.56	D-fructose1-phosphate	C6H13O9P	57	-0.277392	2.46266		0.575669
144	1																																		8.16_179.0563m/z	179.056	8.16	myo-Inositol	C6H12O6	57.1	0.993235	3.308	0.653567	0.597827
HMDB0000929	1																																		3.41_203.0826m/z	203.083	3.41	L-Tryptophan	C11H12N2O2	57.2	0.231658	3.71874	1.52992	1.81491
HMDB0009477	1																																		0.92_720.4974m/z	720.497	0.92	PE(20:5(5Z,8Z,11Z,14Z,17Z)/P-16:0)	C41H72NO7P	57.7	0.0301141	2.56368		2.22821	3.2729
