# Supplementary material for: Comprehensive Metabolomic Analysis Reveals Dynamic Metabolic Reprogramming in Hep3B Cells with Aflatoxin B1 Exposure
Source: Toxins (Basel). 2021 May 27;13(6):384. doi: 10.3390/toxins13060384 (PMC8229485; doi:10.3390/toxins13060384)
Supplement: Supplementary file 1 [file toxins-13-00384-s001.zip › Table S6.xlsx]

## Sheet: Sheet1
Table S6. The significant decrease of 26 acylcarnitines with AFB1 exposure
Metabolic feature	m/z	RT(min)	Metabolite name	Metabolite ID	Formula	Score	Mass Error(ppm)	VIP	FC(16/DMSO)	FC(32/DMSO)	FC(32/16)	Mode
11.39_416.3365m/z	416.337	11.39	3-hydroxyhexadecanoylcarnitine	HMDB0061642	C23H45NO5	44.1	-1.4	2.39026	0.0843566	0.0108533	0.120884	RPLC-POS
10.53_388.3046m/z	388.305	10.53	3-hydroxytetradecanoylcarnitine	HMDB0061640	C21H41NO5	41.9	-2.9	1.57462	0.12187	0.0186968	0.152866	RPLC-POS
1.19_372.3096m/z	372.31	1.19	(±)-Myristoylcarnitine	85175	C21H41NO4	51.5	-3.34026	1.52414	0.243963	0.0208393	0.086552	HILIC-POS
1.15_426.3561m/z	426.356	1.15	Oleoylcarnitine	HMDB0005065	C25H47NO4	48.9	-4.04265	1.22225	0.109728	0.0231258	0.213071	HILIC-POS
7.64_304.2109m/z	304.211	7.64	3-hydroxyoctanoylcarnitine	HMDB0061634	C15H29NO5	42.3	-3.1	1.11586	0.140939	0.0451599	0.319864	RPLC-POS
11.49_372.3112m/z	372.311	11.49	Tetradecanoylcarnitine	HMDB0005066	C21H41NO4	47.9	0.88098	7.36544	0.26263	0.0619964	0.258631	RPLC-POS
12.50_426.3570m/z	426.357	12.5	Octadecenoylcarnitine	HMDB0094687	C25H47NO4	45	-1.8	9.40083	0.144054	0.0645547	0.451507	RPLC-POS
10.62_344.2790m/z	344.279	10.62	Dodecanoylcarnitine	HMDB0002250	C19H37NO4	49.9	-1.42078	2.62744	0.347598	0.0704102	0.207828	RPLC-POS
11.91_386.3252m/z	386.325	11.91	Pentadecanoylcarnitine	HMDB0062517	C22H43NO4	42.1	-3.4	1.95662	0.194243	0.0895794	0.454342	RPLC-POS
3.72_218.1385m/z	218.138	3.72	(±)-Propionylcarnitine	85176	C10H19NO4	51.7	-1.02932	4.70797	0.513876	0.10527	0.205699	HILIC-POS
9.74_316.2475m/z	316.248	9.74	Decanoylcarnitine	HMDB0000651	C17H33NO4	47	-2.21727	1.36636	0.353642	0.107434	0.305109	RPLC-POS
3.75_248.1481m/z	248.148	3.75	(R)-3-hydroxybutyrylcarnitine	HMDB0062735	C11H21NO5	40.8	-4.6	2.05421	0.27654	0.110552	0.399683	RPLC-POS
8.79_288.2164m/z	288.216	8.79	L-Octanoylcarnitine	HMDB0000791	C15H29NO4	43.5	-2.00565	1.3542	0.396407	0.117232	0.311423	RPLC-POS
5.82_218.1384m/z	218.138	5.82	Propionylcarnitine	HMDB0000824	C10H19NO4	47.5	-1.20969	6.53875	0.586793	0.131574	0.230643	RPLC-POS
12.32_400.3427m/z	400.343	12.32	L-Palmitoylcarnitine	HMDB0000222	C23H45NO4	46.1	1.35341	10.4125	0.262089	0.137519	0.548545	RPLC-POS
4.76_204.1229m/z	204.123	4.76	L-Acetylcarnitine	HMDB0000201	C9H17NO4	47.8	-0.604552	4.46851	0.451718	0.191817		HILIC-POS
13.07_428.3721m/z	428.372	13.07	Stearoylcarnitine	HMDB0000848	C25H49NO4	44.5	-3	4.24285	0.161816	0.213394		RPLC-POS
1.46_204.1225m/z	204.123	1.46	Acetylcarnitine	956	C9H17NO4	50.5	-2.78318	6.43273	0.474066	0.229493	0.490108	RPLC-POS
1.96_260.1850m/z	260.185	1.96	L-Hexanoylcarnitine	HMDB0000756	C13H25NO4	49.3	-2.30588	1.68731		0.249602	0.280385	HILIC-POS
5.88_262.1638m/z	262.164	5.88	hydroxyisovaleroylcarnitine	HMDB0062555	C12H23NO5	43	-4.2	2.1416	0.533083	0.252255	0.473302	RPLC-POS
7.55_146.1171m/z	146.117	7.55	3-Dehydroxycarnitine	HMDB0006831	C7H15NO2	51.2	-2.89071	1.87438	0.570138	0.327861	0.575156	HILIC-POS
2.40_246.1699m/z	246.17	2.4	2-Methylbutyroylcarnitine	HMDB0000378	C12H23NO4	50.7	-0.366295	5.82081		0.407641	0.301025	HILIC-POS
6.31_232.1545m/z	232.155	6.31	Isobutyryl-L-carnitine	HMDB0000736	C11H21NO4	45	0.629046	8.57623		0.409977	0.391218	RPLC-POS
2.89_232.1545m/z	232.155	2.89	Butyrylcarnitine	HMDB0002013	C11H21NO4	49.8	0.611205	6.4969		0.415409	0.417627	HILIC-POS
6.74_246.1699m/z	246.17	6.74	Pivaloylcarnitine	HMDB0041993	C12H23NO4	47.8	-0.3649	9.61812		0.430495	0.317411	RPLC-POS
1.29_162.1119m/z	162.112	1.29	L-Carnitine	HMDB0000062	C7H15NO3	48.9	-3.30412	4.6525		0.495162	0.491705	RPLC-POS
